# Supplementary material for: Enhancer–silencer transitions in the human genome
Source: HighWire-hosted journal article supplement (doi:10.1101/gr.275992.121), 2022-02-01
Supplement: Supplemental_Table_S1.xlsx [file Supplemental_Table_S1.xlsx]

## Sheet: summary
Table S1.	Predicted enhancer and silencers
	number of silencers	number of enhancers
ESC	152384	199610
T cell	219971	156451
Monocyte	72387	73613
HepG2	89217	63572
K562	102609	89967
HPC	93702	131432

## Sheet: silencers in ESC
Chromosome	start	end
Chr1	567122	568122
Chr1	567368	568368
Chr1	567914	568914
Chr1	569258	570258
Chr1	723691	724691
Chr1	724001	725001
Chr1	724447	725447
Chr1	724761	725761
Chr1	726517	727517
Chr1	811997	812997
Chr1	824533	825533
Chr1	928346	929346
Chr1	948844	949844
Chr1	948996	949996
Chr1	967134	968134
Chr1	967305	968305
Chr1	1000698	1001698
Chr1	1090728	1091728
Chr1	1134579	1135579
Chr1	1165787	1166787
Chr1	1182577	1183577
Chr1	1186109	1187109
Chr1	1200073	1201073
Chr1	1214807	1215807
Chr1	1218208	1219208
Chr1	1219935	1220935
Chr1	1235066	1236066
Chr1	1235549	1236549
Chr1	1263976	1264976
Chr1	1287865	1288865
Chr1	1357341	1358341
Chr1	1439863	1440863
Chr1	1531772	1532772
Chr1	1540074	1541074
Chr1	1619045	1620045
Chr1	1695393	1696393
Chr1	1786788	1787788
Chr1	1787302	1788302
Chr1	1791717	1792717
Chr1	1793376	1794376
Chr1	1795567	1796567
Chr1	1806677	1807677
Chr1	1811802	1812802
Chr1	1845117	1846117
Chr1	1849103	1850103
Chr1	1874872	1875872
Chr1	1875077	1876077
Chr1	1875316	1876316
Chr1	1902124	1903124
Chr1	1905971	1906971
Chr1	1909874	1910874
Chr1	1913083	1914083
Chr1	1980227	1981227
Chr1	2022526	2023526
Chr1	2050893	2051893
Chr1	2063372	2064372
Chr1	2099000	2100000
Chr1	2178811	2179811
Chr1	2187201	2188201
Chr1	2200416	2201416
Chr1	2299450	2300450
Chr1	2313700	2314700
Chr1	2337878	2338878
Chr1	2340157	2341157
Chr1	2436533	2437533
Chr1	2470459	2471459
Chr1	2529626	2530626
Chr1	2561264	2562264
Chr1	2563502	2564502
Chr1	2567894	2568894
Chr1	2583169	2584169
Chr1	2583330	2584330
Chr1	2583772	2584772
Chr1	2583986	2584986
Chr1	2584783	2585783
Chr1	2585098	2586098
Chr1	2585372	2586372
Chr1	2585686	2586686
Chr1	2585929	2586929
Chr1	2586646	2587646
Chr1	2587205	2588205
Chr1	2615039	2616039
Chr1	2615438	2616438
Chr1	2620186	2621186
Chr1	2621281	2622281
Chr1	2621605	2622605
Chr1	2628739	2629739
Chr1	2688642	2689642
Chr1	2729902	2730902
Chr1	2838277	2839277
Chr1	2940274	2941274
Chr1	3021053	3022053
Chr1	3034413	3035413
Chr1	3174030	3175030
Chr1	3200915	3201915
Chr1	3253473	3254473
Chr1	3714012	3715012
Chr1	3726411	3727411
Chr1	4133222	4134222
Chr1	4157802	4158802
Chr1	4271269	4272269
Chr1	4362661	4363661
Chr1	4377005	4378005
Chr1	5258105	5259105
Chr1	5285010	5286010
Chr1	5336461	5337461
Chr1	5411144	5412144
Chr1	5436225	5437225
Chr1	5486977	5487977
Chr1	5508078	5509078
Chr1	5508264	5509264
Chr1	5655649	5656649
Chr1	5698356	5699356
Chr1	5700655	5701655
Chr1	5726942	5727942
Chr1	5728476	5729476
Chr1	5731208	5732208
Chr1	5731469	5732469
Chr1	5731878	5732878
Chr1	5732228	5733228
Chr1	5746615	5747615
Chr1	5767346	5768346
Chr1	5842000	5843000
Chr1	5879873	5880873
Chr1	5890885	5891885
Chr1	5918608	5919608
Chr1	5921340	5922340
Chr1	6034905	6035905
Chr1	6037664	6038664
Chr1	6061273	6062273
Chr1	6087894	6088894
Chr1	6093994	6094994
Chr1	6094455	6095455
Chr1	6243452	6244452
Chr1	6247040	6248040
Chr1	6415538	6416538
Chr1	6422864	6423864
Chr1	6442193	6443193
Chr1	6447160	6448160
Chr1	6475256	6476256
Chr1	6493945	6494945
Chr1	6504893	6505893
Chr1	6540580	6541580
Chr1	6616689	6617689
Chr1	6643902	6644902
Chr1	6749175	6750175
Chr1	6750128	6751128
Chr1	6795368	6796368
Chr1	6802977	6803977
Chr1	6817451	6818451
Chr1	6947729	6948729
Chr1	7000680	7001680
Chr1	7058011	7059011
Chr1	7062478	7063478
Chr1	7106003	7107003
Chr1	7135106	7136106
Chr1	7162843	7163843
Chr1	7163184	7164184
Chr1	7163568	7164568
Chr1	7164141	7165141
Chr1	7199229	7200229
Chr1	7200818	7201818
Chr1	7288186	7289186
Chr1	7415819	7416819
Chr1	7470327	7471327
Chr1	7579437	7580437
Chr1	7635263	7636263
Chr1	7643215	7644215
Chr1	7963046	7964046
Chr1	8031728	8032728
Chr1	8063983	8064983
Chr1	8110842	8111842
Chr1	8125978	8126978
Chr1	8166637	8167637
Chr1	8213142	8214142
Chr1	8226031	8227031
Chr1	8227562	8228562
Chr1	8272503	8273503
Chr1	8327057	8328057
Chr1	8373919	8374919
Chr1	8378280	8379280
Chr1	8388637	8389637
Chr1	8409321	8410321
Chr1	8457846	8458846
Chr1	8525468	8526468
Chr1	8585331	8586331
Chr1	8727997	8728997
Chr1	8744339	8745339
Chr1	8943983	8944983
Chr1	9022967	9023967
Chr1	9069427	9070427
Chr1	9082534	9083534
Chr1	9090806	9091806
Chr1	9129374	9130374
Chr1	9129538	9130538
Chr1	9159345	9160345
Chr1	9169709	9170709
Chr1	9180325	9181325
Chr1	9182204	9183204
Chr1	9243698	9244698
Chr1	9277709	9278709
Chr1	9292863	9293863
Chr1	9301054	9302054
Chr1	9326492	9327492
Chr1	9470396	9471396
Chr1	9470552	9471552
Chr1	9470708	9471708
Chr1	9513411	9514411
Chr1	9590819	9591819
Chr1	9675296	9676296
Chr1	9677727	9678727
Chr1	9695505	9696505
Chr1	9738200	9739200
Chr1	9762848	9763848
Chr1	9846283	9847283
Chr1	9852069	9853069
Chr1	9856640	9857640
Chr1	9868550	9869550
Chr1	9938247	9939247
Chr1	10105684	10106684
Chr1	10233274	10234274
Chr1	10437173	10438173
Chr1	10515793	10516793
Chr1	10576657	10577657
Chr1	10588008	10589008
Chr1	10615869	10616869
Chr1	10722459	10723459
Chr1	10863731	10864731
Chr1	10932957	10933957
Chr1	11028872	11029872
Chr1	11038388	11039388
Chr1	11041804	11042804
Chr1	11049624	11050624
Chr1	11049887	11050887
Chr1	11090503	11091503
Chr1	11091361	11092361
Chr1	11091856	11092856
Chr1	11112623	11113623
Chr1	11112943	11113943
Chr1	11114114	11115114
Chr1	11162317	11163317
Chr1	11378733	11379733
Chr1	11413431	11414431
Chr1	11425516	11426516
Chr1	11433786	11434786
Chr1	11533384	11534384
Chr1	11591026	11592026
Chr1	11603539	11604539
Chr1	11610453	11611453
Chr1	11614193	11615193
Chr1	11650165	11651165
Chr1	11671686	11672686
Chr1	11715510	11716510
Chr1	11725833	11726833
Chr1	11726344	11727344
Chr1	11737201	11738201
Chr1	11742787	11743787
Chr1	11790096	11791096
Chr1	11801700	11802700
Chr1	11813540	11814540
Chr1	11847796	11848796
Chr1	11899629	11900629
Chr1	11905521	11906521
Chr1	11914626	11915626
Chr1	11925218	11926218
Chr1	11947363	11948363
Chr1	11961148	11962148
Chr1	12056715	12057715
Chr1	12077992	12078992
Chr1	12109511	12110511
Chr1	12124157	12125157
Chr1	12126677	12127677
Chr1	12126898	12127898
Chr1	12133601	12134601
Chr1	12136850	12137850
Chr1	12298525	12299525
Chr1	12550151	12551151
Chr1	12550312	12551312
Chr1	12613708	12614708
Chr1	12625726	12626726
Chr1	12651039	12652039
Chr1	12652203	12653203
Chr1	12661006	12662006
Chr1	12689880	12690880
Chr1	12775525	12776525
Chr1	12805611	12806611
Chr1	12819986	12820986
Chr1	13849947	13850947
Chr1	13881093	13882093
Chr1	13901112	13902112
Chr1	14276838	14277838
Chr1	14292197	14293197
Chr1	14437306	14438306
Chr1	14450928	14451928
Chr1	14690219	14691219
Chr1	14926577	14927577
Chr1	15003988	15004988
Chr1	15063675	15064675
Chr1	15095666	15096666
Chr1	15130829	15131829
Chr1	15153147	15154147
Chr1	15176849	15177849
Chr1	15237078	15238078
Chr1	15249553	15250553
Chr1	15266108	15267108
Chr1	15272200	15273200
Chr1	15461086	15462086
Chr1	15481870	15482870
Chr1	15497665	15498665
Chr1	15497911	15498911
Chr1	15524222	15525222
Chr1	15534072	15535072
Chr1	15666533	15667533
Chr1	15710017	15711017
Chr1	15716882	15717882
Chr1	15791797	15792797
Chr1	15922962	15923962
Chr1	16004743	16005743
Chr1	16065927	16066927
Chr1	16069345	16070345
Chr1	16088685	16089685
Chr1	16109430	16110430
Chr1	16114243	16115243
Chr1	16186267	16187267
Chr1	16284484	16285484
Chr1	16370401	16371401
Chr1	16371935	16372935
Chr1	16398298	16399298
Chr1	16409054	16410054
Chr1	16425088	16426088
Chr1	16439915	16440915
Chr1	16482752	16483752
Chr1	16508556	16509556
Chr1	16508783	16509783
Chr1	16511030	16512030
Chr1	16539279	16540279
Chr1	16562312	16563312
Chr1	16574218	16575218
Chr1	16756817	16757817
Chr1	16801126	16802126
Chr1	16819145	16820145
Chr1	16823640	16824640
Chr1	16835237	16836237
Chr1	16856554	16857554
Chr1	16886709	16887709
Chr1	16887230	16888230
Chr1	16892693	16893693
Chr1	16893039	16894039
Chr1	16893214	16894214
Chr1	16901811	16902811
Chr1	16926652	16927652
Chr1	16929169	16930169
Chr1	16934555	16935555
Chr1	16940752	16941752
Chr1	16948198	16949198
Chr1	16951095	16952095
Chr1	16952251	16953251
Chr1	16958011	16959011
Chr1	16958651	16959651
Chr1	16959183	16960183
Chr1	16964793	16965793
Chr1	16965107	16966107
Chr1	16969098	16970098
Chr1	16969279	16970279
Chr1	16975659	16976659
Chr1	16976148	16977148
Chr1	17029368	17030368
Chr1	17030060	17031060
Chr1	17031379	17032379
Chr1	17034746	17035746
Chr1	17035159	17036159
Chr1	17036292	17037292
Chr1	17038080	17039080
Chr1	17038241	17039241
Chr1	17044363	17045363
Chr1	17044802	17045802
Chr1	17047060	17048060
Chr1	17083875	17084875
Chr1	17092768	17093768
Chr1	17098640	17099640
Chr1	17225271	17226271
Chr1	17232351	17233351
Chr1	17241718	17242718
Chr1	17273689	17274689
Chr1	17289583	17290583
Chr1	17295414	17296414
Chr1	17308198	17309198
Chr1	17340781	17341781
Chr1	17381178	17382178
Chr1	17385812	17386812
Chr1	17539355	17540355
Chr1	17565537	17566537
Chr1	17565817	17566817
Chr1	17712574	17713574
Chr1	17718473	17719473
Chr1	17731909	17732909
Chr1	17760685	17761685
Chr1	17760865	17761865
Chr1	17778182	17779182
Chr1	17811748	17812748
Chr1	17834135	17835135
Chr1	17847043	17848043
Chr1	17856131	17857131
Chr1	17876584	17877584
Chr1	17883456	17884456
Chr1	17915475	17916475
Chr1	17927883	17928883
Chr1	18015531	18016531
Chr1	18023060	18024060
Chr1	18071090	18072090
Chr1	18071374	18072374
Chr1	18157764	18158764
Chr1	18245674	18246674
Chr1	18246520	18247520
Chr1	18247153	18248153
Chr1	18250937	18251937
Chr1	18270868	18271868
Chr1	18310764	18311764
Chr1	18318221	18319221
Chr1	18336598	18337598
Chr1	18388414	18389414
Chr1	18475238	18476238
Chr1	18523530	18524530
Chr1	18564362	18565362
Chr1	18659382	18660382
Chr1	18661378	18662378
Chr1	18725309	18726309
Chr1	18794770	18795770
Chr1	18799319	18800319
Chr1	18857077	18858077
Chr1	18873645	18874645
Chr1	18896038	18897038
Chr1	18925906	18926906
Chr1	18928886	18929886
Chr1	18934687	18935687
Chr1	18955025	18956025
Chr1	18959806	18960806
Chr1	18960171	18961171
Chr1	19003167	19004167
Chr1	19044199	19045199
Chr1	19053566	19054566
Chr1	19358308	19359308
Chr1	19358971	19359971
Chr1	19388816	19389816
Chr1	19693233	19694233
Chr1	19813867	19814867
Chr1	19967154	19968154
Chr1	20006847	20007847
Chr1	20010728	20011728
Chr1	20063494	20064494
Chr1	20098147	20099147
Chr1	20111947	20112947
Chr1	20135249	20136249
Chr1	20135497	20136497
Chr1	20143375	20144375
Chr1	20275107	20276107
Chr1	20276114	20277114
Chr1	20283746	20284746
Chr1	20284015	20285015
Chr1	20310207	20311207
Chr1	20316913	20317913
Chr1	20423017	20424017
Chr1	20423179	20424179
Chr1	20427092	20428092
Chr1	20491624	20492624
Chr1	20505076	20506076
Chr1	20510768	20511768
Chr1	20511367	20512367
Chr1	20538504	20539504
Chr1	20542802	20543802
Chr1	20617577	20618577
Chr1	20655994	20656994
Chr1	20656282	20657282
Chr1	20753173	20754173
Chr1	20765477	20766477
Chr1	20766928	20767928
Chr1	20779778	20780778
Chr1	20784935	20785935
Chr1	20876886	20877886
Chr1	20911032	20912032
Chr1	20914841	20915841
Chr1	20992981	20993981
Chr1	21023690	21024690
Chr1	21025627	21026627
Chr1	21053339	21054339
Chr1	21057074	21058074
Chr1	21089066	21090066
Chr1	21339615	21340615
Chr1	21455811	21456811
Chr1	21455933	21456933
Chr1	21516870	21517870
Chr1	21645620	21646620
Chr1	21648115	21649115
Chr1	21673160	21674160
Chr1	21696737	21697737
Chr1	21697025	21698025
Chr1	21822129	21823129
Chr1	21823048	21824048
Chr1	21879775	21880775
Chr1	21901535	21902535
Chr1	21905907	21906907
Chr1	21935960	21936960
Chr1	21947411	21948411
Chr1	21974087	21975087
Chr1	21989726	21990726
Chr1	21997698	21998698
Chr1	22094657	22095657
Chr1	22112005	22113005
Chr1	22208514	22209514
Chr1	22302949	22303949
Chr1	22374795	22375795
Chr1	22466906	22467906
Chr1	22483607	22484607
Chr1	22496032	22497032
Chr1	22500637	22501637
Chr1	22602006	22603006
Chr1	22646401	22647401
Chr1	22661013	22662013
Chr1	22703180	22704180
Chr1	22709899	22710899
Chr1	22710167	22711167
Chr1	22719298	22720298
Chr1	22926724	22927724
Chr1	22937618	22938618
Chr1	22951660	22952660
Chr1	22984590	22985590
Chr1	22988565	22989565
Chr1	22996548	22997548
Chr1	23004894	23005894
Chr1	23005570	23006570
Chr1	23035458	23036458
Chr1	23075643	23076643
Chr1	23118967	23119967
Chr1	23124298	23125298
Chr1	23188189	23189189
Chr1	23373852	23374852
Chr1	23426464	23427464
Chr1	23496101	23497101
Chr1	23505133	23506133
Chr1	23527099	23528099
Chr1	23536422	23537422
Chr1	23588704	23589704
Chr1	23671376	23672376
Chr1	23718385	23719385
Chr1	23823701	23824701
Chr1	23882586	23883586
Chr1	23882853	23883853
Chr1	23883166	23884166
Chr1	23883362	23884362
Chr1	23887787	23888787
Chr1	23921073	23922073
Chr1	23942622	23943622
Chr1	23977295	23978295
Chr1	23999244	24000244
Chr1	24042522	24043522
Chr1	24116402	24117402
Chr1	24124769	24125769
Chr1	24135852	24136852
Chr1	24373376	24374376
Chr1	24397793	24398793
Chr1	24478837	24479837
Chr1	24481615	24482615
Chr1	24515010	24516010
Chr1	24519524	24520524
Chr1	24535181	24536181
Chr1	24561877	24562877
Chr1	24575044	24576044
Chr1	24580976	24581976
Chr1	24696886	24697886
Chr1	24767636	24768636
Chr1	24809653	24810653
Chr1	24834385	24835385
Chr1	25023597	25024597
Chr1	25051965	25052965
Chr1	25053702	25054702
Chr1	25055578	25056578
Chr1	25080341	25081341
Chr1	25175414	25176414
Chr1	25183871	25184871
Chr1	25264720	25265720
Chr1	25347681	25348681
Chr1	25430864	25431864
Chr1	25524937	25525937
Chr1	25610599	25611599
Chr1	25616182	25617182
Chr1	25695330	25696330
Chr1	25729188	25730188
Chr1	25831979	25832979
Chr1	25854797	25855797
Chr1	25912281	25913281
Chr1	26000878	26001878
Chr1	26020732	26021732
Chr1	26121811	26122811
Chr1	26123696	26124696
Chr1	26193990	26194990
Chr1	26216738	26217738
Chr1	26244821	26245821
Chr1	26388679	26389679
Chr1	26468323	26469323
Chr1	26672162	26673162
Chr1	26684901	26685901
Chr1	26700737	26701737
Chr1	26803708	26804708
Chr1	26812370	26813370
Chr1	26864185	26865185
Chr1	26971351	26972351
Chr1	27046550	27047550
Chr1	27136719	27137719
Chr1	27274757	27275757
Chr1	27293086	27294086
Chr1	27305120	27306120
Chr1	27327696	27328696
Chr1	27328192	27329192
Chr1	27329005	27330005
Chr1	27329205	27330205
Chr1	27355816	27356816
Chr1	27383314	27384314
Chr1	27412396	27413396
Chr1	27438306	27439306
Chr1	27480251	27481251
Chr1	27496868	27497868
Chr1	27677887	27678887
Chr1	27695067	27696067
Chr1	27802378	27803378
Chr1	27844134	27845134
Chr1	27844783	27845783
Chr1	27855127	27856127
Chr1	27864966	27865966
Chr1	27887664	27888664
Chr1	27898800	27899800
Chr1	27917090	27918090
Chr1	27926621	27927621
Chr1	27931717	27932717
Chr1	27934791	27935791
Chr1	27935117	27936117
Chr1	27942674	27943674
Chr1	27967312	27968312
Chr1	27977341	27978341
Chr1	27984717	27985717
Chr1	27985127	27986127
Chr1	27997922	27998922
Chr1	28039328	28040328
Chr1	28104257	28105257
Chr1	28194990	28195990
Chr1	28195537	28196537
Chr1	28195682	28196682
Chr1	28197980	28198980
Chr1	28249266	28250266
Chr1	28258468	28259468
Chr1	28287993	28288993
Chr1	28475735	28476735
Chr1	28480275	28481275
Chr1	28503419	28504419
Chr1	28522051	28523051
Chr1	28522556	28523556
Chr1	28613064	28614064
Chr1	28613628	28614628
Chr1	28694281	28695281
Chr1	28828440	28829440
Chr1	28836628	28837628
Chr1	28838090	28839090
Chr1	28839242	28840242
Chr1	28841059	28842059
Chr1	28845416	28846416
Chr1	28845691	28846691
Chr1	28846630	28847630
Chr1	28847585	28848585
Chr1	28903448	28904448
Chr1	28904921	28905921
Chr1	28908661	28909661
Chr1	28916392	28917392
Chr1	28921631	28922631
Chr1	28980533	28981533
Chr1	28985491	28986491
Chr1	29110977	29111977
Chr1	29111573	29112573
Chr1	29133328	29134328
Chr1	29137354	29138354
Chr1	29157131	29158131
Chr1	29163306	29164306
Chr1	29211764	29212764
Chr1	29212186	29213186
Chr1	29212599	29213599
Chr1	29239775	29240775
Chr1	29472644	29473644
Chr1	29503554	29504554
Chr1	29523691	29524691
Chr1	29569539	29570539
Chr1	29571994	29572994
Chr1	29623646	29624646
Chr1	29638878	29639878
Chr1	29786221	29787221
Chr1	29798198	29799198
Chr1	29829051	29830051
Chr1	30113648	30114648
Chr1	30209128	30210128
Chr1	30356255	30357255
Chr1	30394927	30395927
Chr1	30447610	30448610
Chr1	30795433	30796433
Chr1	30839435	30840435
Chr1	31214953	31215953
Chr1	31221147	31222147
Chr1	31231354	31232354
Chr1	31268032	31269032
Chr1	31273524	31274524
Chr1	31318419	31319419
Chr1	31345314	31346314
Chr1	31352471	31353471
Chr1	31360873	31361873
Chr1	31375867	31376867
Chr1	31376023	31377023
Chr1	31378285	31379285
Chr1	31378522	31379522
Chr1	31381941	31382941
Chr1	31382378	31383378
Chr1	31401873	31402873
Chr1	31402510	31403510
Chr1	31543613	31544613
Chr1	31568622	31569622
Chr1	31595215	31596215
Chr1	31611272	31612272
Chr1	31624934	31625934
Chr1	31667611	31668611
Chr1	31693673	31694673
Chr1	31702048	31703048
Chr1	31849283	31850283
Chr1	31849430	31850430
Chr1	31875116	31876116
Chr1	31980662	31981662
Chr1	32029600	32030600
Chr1	32149066	32150066
Chr1	32164617	32165617
Chr1	32173033	32174033
Chr1	32213824	32214824
Chr1	32244380	32245380
Chr1	32277404	32278404
Chr1	32299799	32300799
Chr1	32345470	32346470
Chr1	32422972	32423972
Chr1	32423225	32424225
Chr1	32444139	32445139
Chr1	32527699	32528699
Chr1	32533320	32534320
Chr1	32557087	32558087
Chr1	32594752	32595752
Chr1	32677353	32678353
Chr1	32700242	32701242
Chr1	32704474	32705474
Chr1	32715014	32716014
Chr1	32797981	32798981
Chr1	32837456	32838456
Chr1	32869417	32870417
Chr1	32879770	32880770
Chr1	32907591	32908591
Chr1	32936287	32937287
Chr1	32986521	32987521
Chr1	33005970	33006970
Chr1	33132162	33133162
Chr1	33166683	33167683
Chr1	33174050	33175050
Chr1	33174784	33175784
Chr1	33220782	33221782
Chr1	33431749	33432749
Chr1	33510520	33511520
Chr1	33520917	33521917
Chr1	33548920	33549920
Chr1	33551112	33552112
Chr1	33585107	33586107
Chr1	33629726	33630726
Chr1	33634376	33635376
Chr1	33717088	33718088
Chr1	33724209	33725209
Chr1	33845051	33846051
Chr1	34435465	34436465
Chr1	34596574	34597574
Chr1	34616559	34617559
Chr1	34632774	34633774
Chr1	34757796	34758796
Chr1	35107983	35108983
Chr1	35116097	35117097
Chr1	35119514	35120514
Chr1	35161514	35162514
Chr1	35174842	35175842
Chr1	35550681	35551681
Chr1	35684725	35685725
Chr1	36126216	36127216
Chr1	36149323	36150323
Chr1	36548499	36549499
Chr1	36583833	36584833
Chr1	36616879	36617879
Chr1	36640761	36641761
Chr1	36675036	36676036
Chr1	36688389	36689389
Chr1	36867160	36868160
Chr1	36872911	36873911
Chr1	37209050	37210050
Chr1	37216086	37217086
Chr1	37240143	37241143
Chr1	37412664	37413664
Chr1	37431567	37432567
Chr1	37541454	37542454
Chr1	37561825	37562825
Chr1	37721799	37722799
Chr1	37791019	37792019
Chr1	37827766	37828766
Chr1	37845842	37846842
Chr1	37860815	37861815
Chr1	37869614	37870614
Chr1	37876036	37877036
Chr1	37901190	37902190
Chr1	37904871	37905871
Chr1	37907394	37908394
Chr1	37907895	37908895
Chr1	37952390	37953390
Chr1	38070619	38071619
Chr1	38087168	38088168
Chr1	38128789	38129789
Chr1	38398206	38399206
Chr1	38401362	38402362
Chr1	38419695	38420695
Chr1	38496459	38497459
Chr1	38503024	38504024
Chr1	38538114	38539114
Chr1	38541398	38542398
Chr1	38556735	38557735
Chr1	38618144	38619144
Chr1	38619412	38620412
Chr1	38647892	38648892
Chr1	38701346	38702346
Chr1	38735279	38736279
Chr1	38843119	38844119
Chr1	38897212	38898212
Chr1	38898601	38899601
Chr1	38919583	38920583
Chr1	39030383	39031383
Chr1	39049739	39050739
Chr1	39145368	39146368
Chr1	39221494	39222494
Chr1	39270451	39271451
Chr1	39282657	39283657
Chr1	39429482	39430482
Chr1	39439287	39440287
Chr1	39465343	39466343
Chr1	39528594	39529594
Chr1	39545665	39546665
Chr1	39633184	39634184
Chr1	39634689	39635689
Chr1	39695865	39696865
Chr1	39696355	39697355
Chr1	39876233	39877233
Chr1	39942833	39943833
Chr1	39955032	39956032
Chr1	39972612	39973612
Chr1	40024720	40025720
Chr1	40076377	40077377
Chr1	40260945	40261945
Chr1	40386795	40387795
Chr1	40387173	40388173
Chr1	40446160	40447160
Chr1	40460333	40461333
Chr1	40483550	40484550
Chr1	41035879	41036879
Chr1	41062266	41063266
Chr1	41090454	41091454
Chr1	41103793	41104793
Chr1	41112994	41113994
Chr1	41118068	41119068
Chr1	41128878	41129878
Chr1	41129821	41130821
Chr1	41134178	41135178
Chr1	41268353	41269353
Chr1	41338928	41339928
Chr1	41356859	41357859
Chr1	41429820	41430820
Chr1	41582649	41583649
Chr1	41748034	41749034
Chr1	41796382	41797382
Chr1	41823010	41824010
Chr1	41839428	41840428
Chr1	41858586	41859586
Chr1	41883372	41884372
Chr1	41939108	41940108
Chr1	41962589	41963589
Chr1	41962877	41963877
Chr1	41978736	41979736
Chr1	42007325	42008325
Chr1	42110243	42111243
Chr1	42219768	42220768
Chr1	42275792	42276792
Chr1	42316980	42317980
Chr1	42622953	42623953
Chr1	42944995	42945995
Chr1	43149478	43150478
Chr1	43185330	43186330
Chr1	43289910	43290910
Chr1	43390849	43391849
Chr1	43444304	43445304
Chr1	43532613	43533613
Chr1	43618156	43619156
Chr1	43680342	43681342
Chr1	43690462	43691462
Chr1	43815566	43816566
Chr1	43902644	43903644
Chr1	44003108	44004108
Chr1	44011702	44012702
Chr1	44019821	44020821
Chr1	44055746	44056746
Chr1	44084984	44085984
Chr1	44097483	44098483
Chr1	44102126	44103126
Chr1	44125153	44126153
Chr1	44374248	44375248
Chr1	44416576	44417576
Chr1	44433719	44434719
Chr1	44515646	44516646
Chr1	44550615	44551615
Chr1	44755660	44756660
Chr1	44821283	44822283
Chr1	44988864	44989864
Chr1	45091525	45092525
Chr1	45117574	45118574
Chr1	45147244	45148244
Chr1	45168461	45169461
Chr1	45171396	45172396
Chr1	45184655	45185655
Chr1	45203053	45204053
Chr1	45246148	45247148
Chr1	45258954	45259954
Chr1	45259955	45260955
Chr1	45263786	45264786
Chr1	45280107	45281107
Chr1	45343181	45344181
Chr1	45484020	45485020
Chr1	45766925	45767925
Chr1	45876893	45877893
Chr1	45964575	45965575
Chr1	45973695	45974695
Chr1	46041180	46042180
Chr1	46047402	46048402
Chr1	46047558	46048558
Chr1	46134506	46135506
Chr1	46634856	46635856
Chr1	46637385	46638385
Chr1	46688949	46689949
Chr1	46691485	46692485
Chr1	46693996	46694996
Chr1	46858817	46859817
Chr1	46860644	46861644
Chr1	46866501	46867501
Chr1	46878967	46879967
Chr1	46912523	46913523
Chr1	46932781	46933781
Chr1	46950126	46951126
Chr1	46985689	46986689
Chr1	46992737	46993737
Chr1	47014990	47015990
Chr1	47018897	47019897
Chr1	47078540	47079540
Chr1	47081016	47082016
Chr1	47082563	47083563
Chr1	47185267	47186267
Chr1	47201097	47202097
Chr1	47322948	47323948
Chr1	47854157	47855157
Chr1	47908136	47909136
Chr1	47923855	47924855
Chr1	47924381	47925381
Chr1	47924602	47925602
Chr1	47969198	47970198
Chr1	48035230	48036230
Chr1	48059878	48060878
Chr1	48084088	48085088
Chr1	48086342	48087342
Chr1	48092374	48093374
Chr1	48420200	48421200
Chr1	48428141	48429141
Chr1	48447030	48448030
Chr1	48456522	48457522
Chr1	48463770	48464770
Chr1	48701897	48702897
Chr1	48702146	48703146
Chr1	48936142	48937142
Chr1	49153765	49154765
Chr1	49175757	49176757
Chr1	49241212	49242212
Chr1	49413443	49414443
Chr1	49481943	49482943
Chr1	50733442	50734442
Chr1	50835218	50836218
Chr1	50901588	50902588
Chr1	50937378	50938378
Chr1	51156722	51157722
Chr1	51439280	51440280
Chr1	51695135	51696135
Chr1	51776298	51777298
Chr1	51778806	51779806
Chr1	52075958	52076958
Chr1	52807283	52808283
Chr1	53094636	53095636
Chr1	53094822	53095822
Chr1	53106742	53107742
Chr1	53131740	53132740
Chr1	53162588	53163588
Chr1	53513460	53514460
Chr1	53570830	53571830
Chr1	53582166	53583166
Chr1	53638024	53639024
Chr1	53638196	53639196
Chr1	53731460	53732460
Chr1	53769655	53770655
Chr1	53828740	53829740
Chr1	53982482	53983482
Chr1	53988427	53989427
Chr1	53991002	53992002
Chr1	54058064	54059064
Chr1	54106955	54107955
Chr1	54138778	54139778
Chr1	54149001	54150001
Chr1	54149573	54150573
Chr1	54379108	54380108
Chr1	54412482	54413482
Chr1	54673956	54674956
Chr1	54687649	54688649
Chr1	54688257	54689257
Chr1	54689238	54690238
Chr1	54776854	54777854
Chr1	54777150	54778150
Chr1	54781056	54782056
Chr1	54793852	54794852
Chr1	54814137	54815137
Chr1	54819355	54820355
Chr1	54820297	54821297
Chr1	54825802	54826802
Chr1	54838344	54839344
Chr1	54874050	54875050
Chr1	54877165	54878165
Chr1	54879797	54880797
Chr1	54881416	54882416
Chr1	54890614	54891614
Chr1	54904888	54905888
Chr1	54905580	54906580
Chr1	54930874	54931874
Chr1	54939482	54940482
Chr1	54981942	54982942
Chr1	54985076	54986076
Chr1	54998639	54999639
Chr1	55009438	55010438
Chr1	55035365	55036365
Chr1	55063268	55064268
Chr1	55113969	55114969
Chr1	55133972	55134972
Chr1	55233452	55234452
Chr1	55274171	55275171
Chr1	55275812	55276812
Chr1	55307872	55308872
Chr1	55459605	55460605
Chr1	55465463	55466463
Chr1	55501264	55502264
Chr1	55503336	55504336
Chr1	55503752	55504752
Chr1	55609067	55610067
Chr1	56655504	56656504
Chr1	56761432	56762432
Chr1	56874431	56875431
Chr1	57036510	57037510
Chr1	57663754	57664754
Chr1	57722421	57723421
Chr1	57772799	57773799
Chr1	57835241	57836241
Chr1	57843131	57844131
Chr1	58047840	58048840
Chr1	58098603	58099603
Chr1	58125726	58126726
Chr1	58530891	58531891
Chr1	58531160	58532160
Chr1	58717064	58718064
Chr1	58873374	58874374
Chr1	59086242	59087242
Chr1	59197084	59198084
Chr1	59416279	59417279
Chr1	59649932	59650932
Chr1	59823008	59824008
Chr1	60138185	60139185
Chr1	60234231	60235231
Chr1	61435333	61436333
Chr1	61490909	61491909
Chr1	61553695	61554695
Chr1	61615893	61616893
Chr1	62408759	62409759
Chr1	62478642	62479642
Chr1	62533470	62534470
Chr1	62634125	62635125
Chr1	62678279	62679279
Chr1	62678654	62679654
Chr1	62700285	62701285
Chr1	62800855	62801855
Chr1	62877861	62878861
Chr1	62995925	62996925
Chr1	63430964	63431964
Chr1	63457061	63458061
Chr1	63468968	63469968
Chr1	63932129	63933129
Chr1	64088326	64089326
Chr1	64136915	64137915
Chr1	64195745	64196745
Chr1	64212656	64213656
Chr1	64256421	64257421
Chr1	64329473	64330473
Chr1	64329626	64330626
Chr1	64381881	64382881
Chr1	65294775	65295775
Chr1	65311125	65312125
Chr1	65326950	65327950
Chr1	65353192	65354192
Chr1	65358187	65359187
Chr1	65432667	65433667
Chr1	65433402	65434402
Chr1	65433624	65434624
Chr1	65640502	65641502
Chr1	65733083	65734083
Chr1	65758124	65759124
Chr1	66015669	66016669
Chr1	66258844	66259844
Chr1	67176835	67177835
Chr1	67614020	67615020
Chr1	67807035	67808035
Chr1	67807422	67808422
Chr1	67866718	67867718
Chr1	67926611	67927611
Chr1	68113971	68114971
Chr1	68219540	68220540
Chr1	68232570	68233570
Chr1	68286666	68287666
Chr1	68473871	68474871
Chr1	68511939	68512939
Chr1	68577197	68578197
Chr1	68627360	68628360
Chr1	68808088	68809088
Chr1	70027537	70028537
Chr1	70804307	70805307
Chr1	70952883	70953883
Chr1	70953242	70954242
Chr1	71331862	71332862
Chr1	71510964	71511964
Chr1	72429593	72430593
Chr1	72583689	72584689
Chr1	72926087	72927087
Chr1	73190745	73191745
Chr1	74973860	74974860
Chr1	75037363	75038363
Chr1	75570238	75571238
Chr1	75950027	75951027
Chr1	76307931	76308931
Chr1	76558083	76559083
Chr1	76595162	76596162
Chr1	76751910	76752910
Chr1	78442101	78443101
Chr1	78608286	78609286
Chr1	78979347	78980347
Chr1	80461315	80462315
Chr1	81843626	81844626
Chr1	82948536	82949536
Chr1	82982955	82983955
Chr1	84010823	84011823
Chr1	84853116	84854116
Chr1	85568463	85569463
Chr1	85574770	85575770
Chr1	85587528	85588528
Chr1	86047497	86048497
Chr1	86107291	86108291
Chr1	86522314	86523314
Chr1	86804997	86805997
Chr1	86842723	86843723
Chr1	87279557	87280557
Chr1	87581742	87582742
Chr1	88147933	88148933
Chr1	88149636	88150636
Chr1	89218878	89219878
Chr1	89375755	89376755
Chr1	89387555	89388555
Chr1	89614613	89615613
Chr1	89823726	89824726
Chr1	90256558	90257558
Chr1	90272734	90273734
Chr1	90361553	90362553
Chr1	90511918	90512918
Chr1	90961847	90962847
Chr1	91028942	91029942
Chr1	91179261	91180261
Chr1	91179840	91180840
Chr1	91226460	91227460
Chr1	91588517	91589517
Chr1	91852467	91853467
Chr1	92056432	92057432
Chr1	92295022	92296022
Chr1	92550943	92551943
Chr1	93464034	93465034
Chr1	93717205	93718205
Chr1	93898915	93899915
Chr1	93927116	93928116
Chr1	94080592	94081592
Chr1	94084764	94085764
Chr1	94125241	94126241
Chr1	94160058	94161058
Chr1	94180941	94181941
Chr1	94233165	94234165
Chr1	94279951	94280951
Chr1	94310783	94311783
Chr1	94526671	94527671
Chr1	94528581	94529581
Chr1	94557457	94558457
Chr1	94795212	94796212
Chr1	95017478	95018478
Chr1	95108984	95109984
Chr1	95328051	95329051
Chr1	95393363	95394363
Chr1	95849817	95850817
Chr1	96341592	96342592
Chr1	97185920	97186920
Chr1	98310596	98311596
Chr1	100265711	100266711
Chr1	100430084	100431084
Chr1	100754262	100755262
Chr1	100926326	100927326
Chr1	100926607	100927607
Chr1	102628891	102629891
Chr1	104484367	104485367
Chr1	105476223	105477223
Chr1	105615149	105616149
Chr1	106524394	106525394
Chr1	106810385	106811385
Chr1	107737780	107738780
Chr1	107861316	107862316
Chr1	108074738	108075738
Chr1	108329596	108330596
Chr1	108673177	108674177
Chr1	109045369	109046369
Chr1	109078550	109079550
Chr1	109449087	109450087
Chr1	109733617	109734617
Chr1	109784770	109785770
Chr1	109795474	109796474
Chr1	109834507	109835507
Chr1	109837301	109838301
Chr1	109848292	109849292
Chr1	110030496	110031496
Chr1	110080027	110081027
Chr1	110213612	110214612
Chr1	110246503	110247503
Chr1	110330783	110331783
Chr1	110460571	110461571
Chr1	110630417	110631417
Chr1	110698192	110699192
Chr1	110807978	110808978
Chr1	110958624	110959624
Chr1	111017701	111018701
Chr1	111090675	111091675
Chr1	111098389	111099389
Chr1	111288995	111289995
Chr1	112023985	112024985
Chr1	112283314	112284314
Chr1	112283549	112284549
Chr1	112297100	112298100
Chr1	112407156	112408156
Chr1	112467083	112468083
Chr1	112502390	112503390
Chr1	112901144	112902144
Chr1	113262669	113263669
Chr1	113340658	113341658
Chr1	113344615	113345615
Chr1	113367358	113368358
Chr1	113449786	113450786
Chr1	113465150	113466150
Chr1	113749368	113750368
Chr1	113810381	113811381
Chr1	113930884	113931884
Chr1	114446501	114447501
Chr1	114456626	114457626
Chr1	114553072	114554072
Chr1	114574928	114575928
Chr1	114576706	114577706
Chr1	114693751	114694751
Chr1	114734686	114735686
Chr1	115015519	115016519
Chr1	115434582	115435582
Chr1	115632800	115633800
Chr1	116008750	116009750
Chr1	116034661	116035661
Chr1	116087759	116088759
Chr1	116260666	116261666
Chr1	116310874	116311874
Chr1	117142181	117143181
Chr1	117378484	117379484
Chr1	117424063	117425063
Chr1	117714793	117715793
Chr1	117837550	117838550
Chr1	117900604	117901604
Chr1	118113244	118114244
Chr1	118228313	118229313
Chr1	118256168	118257168
Chr1	119536145	119537145
Chr1	119990435	119991435
Chr1	120125584	120126584
Chr1	120226481	120227481
Chr1	120251367	120252367
Chr1	120313365	120314365
Chr1	120369405	120370405
Chr1	120497096	120498096
Chr1	121351350	121352350
Chr1	121351750	121352750
Chr1	121352364	121353364
Chr1	121352695	121353695
Chr1	121353511	121354511
Chr1	121353875	121354875
Chr1	121354179	121355179
Chr1	121354655	121355655
Chr1	121355253	121356253
Chr1	121355545	121356545
Chr1	121356297	121357297
Chr1	121356452	121357452
Chr1	121356722	121357722
Chr1	121357527	121358527
Chr1	121357694	121358694
Chr1	121358263	121359263
Chr1	121359216	121360216
Chr1	121361380	121362380
Chr1	121369814	121370814
Chr1	121375873	121376873
Chr1	121376187	121377187
Chr1	121380913	121381913
Chr1	121381519	121382519
Chr1	121381808	121382808
Chr1	121382030	121383030
Chr1	121384803	121385803
Chr1	121385798	121386798
Chr1	121386315	121387315
Chr1	121386519	121387519
Chr1	121473448	121474448
Chr1	121478159	121479159
Chr1	121479279	121480279
Chr1	121479471	121480471
Chr1	121479705	121480705
Chr1	121482822	121483822
Chr1	121483049	121484049
Chr1	142535379	142536379
Chr1	142536098	142537098
Chr1	142536495	142537495
Chr1	142537325	142538325
Chr1	142538614	142539614
Chr1	142539678	142540678
Chr1	142539817	142540817
Chr1	142540098	142541098
Chr1	142540461	142541461
Chr1	142541905	142542905
Chr1	142542188	142543188
Chr1	142585053	142586053
Chr1	142631658	142632658
Chr1	143278294	143279294
Chr1	143278550	143279550
Chr1	143279906	143280906
Chr1	143283135	143284135
Chr1	143283278	143284278
Chr1	143536240	143537240
Chr1	143879342	143880342
Chr1	143879476	143880476
Chr1	144006427	144007427
Chr1	144529717	144530717
Chr1	144534910	144535910
Chr1	144535856	144536856
Chr1	144539059	144540059
Chr1	144539347	144540347
Chr1	144550244	144551244
Chr1	144581494	144582494
Chr1	144853619	144854619
Chr1	144862632	144863632
Chr1	144886414	144887414
Chr1	144887442	144888442
Chr1	144921678	144922678
Chr1	144930377	144931377
Chr1	144975728	144976728
Chr1	144995198	144996198
Chr1	145004943	145005943
Chr1	145005163	145006163
Chr1	145015983	145016983
Chr1	145021974	145022974
Chr1	145027509	145028509
Chr1	145047684	145048684
Chr1	145059058	145060058
Chr1	145059567	145060567
Chr1	145061847	145062847
Chr1	145067915	145068915
Chr1	145071968	145072968
Chr1	145078923	145079923
Chr1	145195516	145196516
Chr1	145380961	145381961
Chr1	145399455	145400455
Chr1	145451154	145452154
Chr1	145588160	145589160
Chr1	145703481	145704481
Chr1	146560699	146561699
Chr1	146601402	146602402
Chr1	146695298	146696298
Chr1	146814732	146815732
Chr1	147069991	147070991
Chr1	147195764	147196764
Chr1	147363943	147364943
Chr1	147716937	147717937
Chr1	147719517	147720517
Chr1	147730374	147731374
Chr1	147736754	147737754
Chr1	147751939	147752939
Chr1	148008728	148009728
Chr1	148009096	148010096
Chr1	148543383	148544383
Chr1	148551858	148552858
Chr1	148863511	148864511
Chr1	148895714	148896714
Chr1	148929717	148930717
Chr1	148947986	148948986
Chr1	149203972	149204972
Chr1	149222177	149223177
Chr1	149281910	149282910
Chr1	149293831	149294831
Chr1	149872003	149873003
Chr1	149909515	149910515
Chr1	149994065	149995065
Chr1	150235022	150236022
Chr1	150543316	150544316
Chr1	150761512	150762512
Chr1	150761885	150762885
Chr1	150785226	150786226
Chr1	150945459	150946459
Chr1	150949132	150950132
Chr1	151021589	151022589
Chr1	151131145	151132145
Chr1	151264604	151265604
Chr1	151280404	151281404
Chr1	151457801	151458801
Chr1	151591279	151592279
Chr1	151687174	151688174
Chr1	151879564	151880564
Chr1	151984038	151985038
Chr1	152898279	152899279
Chr1	153164899	153165899
Chr1	153181026	153182026
Chr1	153210676	153211676
Chr1	153325795	153326795
Chr1	153379451	153380451
Chr1	153424585	153425585
Chr1	153619417	153620417
Chr1	153718295	153719295
Chr1	153755038	153756038
Chr1	153764105	153765105
Chr1	153875874	153876874
Chr1	153902428	153903428
Chr1	153931582	153932582
Chr1	153934203	153935203
Chr1	153967825	153968825
Chr1	154324693	154325693
Chr1	154407760	154408760
Chr1	154479262	154480262
Chr1	154511930	154512930
Chr1	154518609	154519609
Chr1	154545408	154546408
Chr1	154575220	154576220
Chr1	154587051	154588051
Chr1	154686726	154687726
Chr1	154713992	154714992
Chr1	154746822	154747822
Chr1	154791751	154792751
Chr1	154853883	154854883
Chr1	154878760	154879760
Chr1	154884698	154885698
Chr1	154908205	154909205
Chr1	154937725	154938725
Chr1	154943495	154944495
Chr1	154954026	154955026
Chr1	154955583	154956583
Chr1	154978989	154979989
Chr1	154992707	154993707
Chr1	154993457	154994457
Chr1	154993646	154994646
Chr1	155016182	155017182
Chr1	155030117	155031117
Chr1	155084713	155085713
Chr1	155100794	155101794
Chr1	155166402	155167402
Chr1	155175360	155176360
Chr1	155175558	155176558
Chr1	155210530	155211530
Chr1	155211310	155212310
Chr1	155219508	155220508
Chr1	155230820	155231820
Chr1	155264082	155265082
Chr1	155295615	155296615
Chr1	155881556	155882556
Chr1	155909663	155910663
Chr1	155935613	155936613
Chr1	155977886	155978886
Chr1	156002329	156003329
Chr1	156063364	156064364
Chr1	156082777	156083777
Chr1	156094519	156095519
Chr1	156110459	156111459
Chr1	156181521	156182521
Chr1	156329425	156330425
Chr1	156336828	156337828
Chr1	156402099	156403099
Chr1	156403326	156404326
Chr1	156404327	156405327
Chr1	156431262	156432262
Chr1	156453937	156454937
Chr1	156543380	156544380
Chr1	156581962	156582962
Chr1	156597101	156598101
Chr1	156605999	156606999
Chr1	156607295	156608295
Chr1	156628732	156629732
Chr1	156644588	156645588
Chr1	156651421	156652421
Chr1	156652877	156653877
Chr1	156657760	156658760
Chr1	156660198	156661198
Chr1	156670592	156671592
Chr1	156672436	156673436
Chr1	156681377	156682377
Chr1	156684292	156685292
Chr1	156696078	156697078
Chr1	156892412	156893412
Chr1	156894614	156895614
Chr1	156894828	156895828
Chr1	156895698	156896698
Chr1	156957418	156958418
Chr1	157053035	157054035
Chr1	157067258	157068258
Chr1	157140690	157141690
Chr1	157281237	157282237
Chr1	157743209	157744209
Chr1	157961683	157962683
Chr1	158178239	158179239
Chr1	158305840	158306840
Chr1	158763108	158764108
Chr1	158763304	158764304
Chr1	158975101	158976101
Chr1	159071898	159072898
Chr1	159146775	159147775
Chr1	159166008	159167008
Chr1	159391351	159392351
Chr1	159878709	159879709
Chr1	159883576	159884576
Chr1	160027552	160028552
Chr1	160066745	160067745
Chr1	160072204	160073204
Chr1	160081977	160082977
Chr1	160131786	160132786
Chr1	160137202	160138202
Chr1	160139484	160140484
Chr1	160344890	160345890
Chr1	160737780	160738780
Chr1	160749327	160750327
Chr1	160975995	160976995
Chr1	160981365	160982365
Chr1	161010962	161011962
Chr1	161123389	161124389
Chr1	161140086	161141086
Chr1	161190175	161191175
Chr1	161226608	161227608
Chr1	161442695	161443695
Chr1	161586329	161587329
Chr1	161991372	161992372
Chr1	162115323	162116323
Chr1	162243545	162244545
Chr1	164584695	164585695
Chr1	164602959	164603959
Chr1	164631394	164632394
Chr1	164748410	164749410
Chr1	164753813	164754813
Chr1	164754634	164755634
Chr1	165313102	165314102
Chr1	165851376	165852376
Chr1	165918270	165919270
Chr1	166004501	166005501
Chr1	166352642	166353642
Chr1	167127286	167128286
Chr1	167397958	167398958
Chr1	167417097	167418097
Chr1	167453765	167454765
Chr1	167668211	167669211
Chr1	167681588	167682588
Chr1	167715167	167716167
Chr1	167742995	167743995
Chr1	167789571	167790571
Chr1	167847676	167848676
Chr1	168074642	168075642
Chr1	168098884	168099884
Chr1	168212683	168213683
Chr1	168367921	168368921
Chr1	168590193	168591193
Chr1	168656718	168657718
Chr1	168800156	168801156
Chr1	169564690	169565690
Chr1	171229859	171230859
Chr1	171391267	171392267
Chr1	171452592	171453592
Chr1	171462037	171463037
Chr1	171604981	171605981
Chr1	171880415	171881415
Chr1	172600772	172601772
Chr1	172746616	172747616
Chr1	173446941	173447941
Chr1	173836021	173837021
Chr1	173999490	174000490
Chr1	174769043	174770043
Chr1	174769180	174770180
Chr1	174898736	174899736
Chr1	175085763	175086763
Chr1	175097409	175098409
Chr1	175132529	175133529
Chr1	175137618	175138618
Chr1	175189703	175190703
Chr1	175345020	175346020
Chr1	175618239	175619239
Chr1	175832607	175833607
Chr1	175871119	175872119
Chr1	176333319	176334319
Chr1	177322243	177323243
Chr1	177459101	177460101
Chr1	177679873	177680873
Chr1	177769330	177770330
Chr1	178004925	178005925
Chr1	179090450	179091450
Chr1	179261149	179262149
Chr1	179499120	179500120
Chr1	180488677	180489677
Chr1	180490180	180491180
Chr1	180512866	180513866
Chr1	180895014	180896014
Chr1	181046703	181047703
Chr1	181288810	181289810
Chr1	181392260	181393260
Chr1	181466622	181467622
Chr1	181938085	181939085
Chr1	181971372	181972372
Chr1	182030354	182031354
Chr1	182268721	182269721
Chr1	182367946	182368946
Chr1	182378979	182379979
Chr1	182564493	182565493
Chr1	182568187	182569187
Chr1	182643492	182644492
Chr1	182732887	182733887
Chr1	182750710	182751710
Chr1	182859688	182860688
Chr1	183128819	183129819
Chr1	183195677	183196677
Chr1	183203063	183204063
Chr1	183249969	183250969
Chr1	183315191	183316191
Chr1	183322479	183323479
Chr1	183337042	183338042
Chr1	183373599	183374599
Chr1	183531896	183532896
Chr1	183548938	183549938
Chr1	183555638	183556638
Chr1	183555794	183556794
Chr1	183753051	183754051
Chr1	183891100	183892100
Chr1	184192126	184193126
Chr1	184339756	184340756
Chr1	184390903	184391903
Chr1	185632287	185633287
Chr1	185978639	185979639
Chr1	186181390	186182390
Chr1	187811569	187812569
Chr1	188468531	188469531
Chr1	190791783	190792783
Chr1	191898222	191899222
Chr1	193896366	193897366
Chr1	195553705	195554705
Chr1	196504543	196505543
Chr1	196692168	196693168
Chr1	197178356	197179356
Chr1	197809983	197810983
Chr1	197876591	197877591
Chr1	198299774	198300774
Chr1	198385104	198386104
Chr1	198943692	198944692
Chr1	198995120	198996120
Chr1	199480960	199481960
Chr1	199917688	199918688
Chr1	200057450	200058450
Chr1	200195560	200196560
Chr1	200331232	200332232
Chr1	200334608	200335608
Chr1	200334909	200335909
Chr1	200649257	200650257
Chr1	200706903	200707903
Chr1	200859120	200860120
Chr1	200886272	200887272
Chr1	200991343	200992343
Chr1	201011939	201012939
Chr1	201012891	201013891
Chr1	201022051	201023051
Chr1	201096830	201097830
Chr1	201314034	201315034
Chr1	201344660	201345660
Chr1	201368971	201369971
Chr1	201401504	201402504
Chr1	201471124	201472124
Chr1	201646628	201647628
Chr1	201676829	201677829
Chr1	201696607	201697607
Chr1	201858877	201859877
Chr1	201940962	201941962
Chr1	202029926	202030926
Chr1	202036010	202037010
Chr1	202036248	202037248
Chr1	202055702	202056702
Chr1	202114042	202115042
Chr1	202146000	202147000
Chr1	202172790	202173790
Chr1	202176064	202177064
Chr1	202203391	202204391
Chr1	202257823	202258823
Chr1	202474787	202475787
Chr1	202568943	202569943
Chr1	202593564	202594564
Chr1	202618472	202619472
Chr1	202626101	202627101
Chr1	202647328	202648328
Chr1	202649433	202650433
Chr1	202661795	202662795
Chr1	202665963	202666963
Chr1	202677198	202678198
Chr1	203022352	203023352
Chr1	203022747	203023747
Chr1	203023400	203024400
Chr1	203115348	203116348
Chr1	203116947	203117947
Chr1	203165274	203166274
Chr1	203188762	203189762
Chr1	203239222	203240222
Chr1	203239791	203240791
Chr1	203246867	203247867
Chr1	203247819	203248819
Chr1	203255341	203256341
Chr1	203297652	203298652
Chr1	203314710	203315710
Chr1	203409700	203410700
Chr1	203508908	203509908
Chr1	203522332	203523332
Chr1	203523844	203524844
Chr1	203542539	203543539
Chr1	203544186	203545186
Chr1	203559428	203560428
Chr1	203561591	203562591
Chr1	203567792	203568792
Chr1	203578264	203579264
Chr1	203578481	203579481
Chr1	203593128	203594128
Chr1	203618576	203619576
Chr1	203651498	203652498
Chr1	203670925	203671925
Chr1	203752353	203753353
Chr1	203757764	203758764
Chr1	203958922	203959922
Chr1	203972692	203973692
Chr1	204005810	204006810
Chr1	204025037	204026037
Chr1	204070965	204071965
Chr1	204073943	204074943
Chr1	204105668	204106668
Chr1	204110083	204111083
Chr1	204254741	204255741
Chr1	204291313	204292313
Chr1	204310111	204311111
Chr1	204414670	204415670
Chr1	204476598	204477598
Chr1	204529436	204530436
Chr1	204569751	204570751
Chr1	204569928	204570928
Chr1	204588653	204589653
Chr1	204646669	204647669
Chr1	204661175	204662175
Chr1	204806261	204807261
Chr1	204943142	204944142
Chr1	204992477	204993477
Chr1	205013335	205014335
Chr1	205035191	205036191
Chr1	205110917	205111917
Chr1	205161015	205162015
Chr1	205224915	205225915
Chr1	205315799	205316799
Chr1	205329748	205330748
Chr1	205354504	205355504
Chr1	205407510	205408510
Chr1	205407692	205408692
Chr1	205415705	205416705
Chr1	205427761	205428761
Chr1	205452237	205453237
Chr1	205517067	205518067
Chr1	205594813	205595813
Chr1	205614357	205615357
Chr1	205629066	205630066
Chr1	205656079	205657079
Chr1	205657825	205658825
Chr1	205876616	205877616
Chr1	206641739	206642739
Chr1	206671685	206672685
Chr1	206675406	206676406
Chr1	206697864	206698864
Chr1	206735990	206736990
Chr1	206834204	206835204
Chr1	206875373	206876373
Chr1	206899527	206900527
Chr1	206907527	206908527
Chr1	207085724	207086724
Chr1	207098355	207099355
Chr1	207104786	207105786
Chr1	207489665	207490665
Chr1	207871428	207872428
Chr1	208282256	208283256
Chr1	208317591	208318591
Chr1	208547634	208548634
Chr1	209701039	209702039
Chr1	209763514	209764514
Chr1	209848909	209849909
Chr1	210437918	210438918
Chr1	210534234	210535234
Chr1	210605674	210606674
Chr1	210826780	210827780
Chr1	211028517	211029517
Chr1	211415799	211416799
Chr1	211498272	211499272
Chr1	211709663	211710663
Chr1	211786378	211787378
Chr1	211854888	211855888
Chr1	211872372	211873372
Chr1	212011520	212012520
Chr1	212092161	212093161
Chr1	212151208	212152208
Chr1	212382173	212383173
Chr1	212440501	212441501
Chr1	212659184	212660184
Chr1	213070111	213071111
Chr1	213070492	213071492
Chr1	213088002	213089002
Chr1	213088246	213089246
Chr1	213091936	213092936
Chr1	213093964	213094964
Chr1	213094102	213095102
Chr1	213096837	213097837
Chr1	213137411	213138411
Chr1	213140554	213141554
Chr1	213404956	213405956
Chr1	214104795	214105795
Chr1	214152224	214153224
Chr1	214423242	214424242
Chr1	214596092	214597092
Chr1	215107268	215108268
Chr1	215825388	215826388
Chr1	217311915	217312915
Chr1	217581735	217582735
Chr1	218633413	218634413
Chr1	220012989	220013989
Chr1	220140581	220141581
Chr1	220177369	220178369
Chr1	220473414	220474414
Chr1	220660507	220661507
Chr1	220858921	220859921
Chr1	220860835	220861835
Chr1	220899625	220900625
Chr1	220986022	220987022
Chr1	222166600	222167600
Chr1	223188069	223189069
Chr1	223191075	223192075
Chr1	223191474	223192474
Chr1	223191844	223192844
Chr1	223214586	223215586
Chr1	223348057	223349057
Chr1	223397501	223398501
Chr1	223518782	223519782
Chr1	223659337	223660337
Chr1	223835443	223836443
Chr1	224020088	224021088
Chr1	224198988	224199988
Chr1	224199319	224200319
Chr1	224199813	224200813
Chr1	224200177	224201177
Chr1	224200496	224201496
Chr1	224200735	224201735
Chr1	224201201	224202201
Chr1	224201661	224202661
Chr1	224202048	224203048
Chr1	224202633	224203633
Chr1	224203190	224204190
Chr1	224203482	224204482
Chr1	224329588	224330588
Chr1	224354970	224355970
Chr1	224476836	224477836
Chr1	224685011	224686011
Chr1	224688182	224689182
Chr1	224691788	224692788
Chr1	224961805	224962805
Chr1	225063193	225064193
Chr1	225661228	225662228
Chr1	225663365	225664365
Chr1	225708021	225709021
Chr1	225829559	225830559
Chr1	225854807	225855807
Chr1	225925339	225926339
Chr1	225947899	225948899
Chr1	225996412	225997412
Chr1	226065082	226066082
Chr1	226071065	226072065
Chr1	226071196	226072196
Chr1	226079184	226080184
Chr1	226087943	226088943
Chr1	226101175	226102175
Chr1	226118674	226119674
Chr1	226130020	226131020
Chr1	226130207	226131207
Chr1	226204549	226205549
Chr1	226208866	226209866
Chr1	226265743	226266743
Chr1	226497740	226498740
Chr1	226534353	226535353
Chr1	226539109	226540109
Chr1	226590700	226591700
Chr1	226699502	226700502
Chr1	226784219	226785219
Chr1	226866222	226867222
Chr1	226898574	226899574
Chr1	226898777	226899777
Chr1	227132099	227133099
Chr1	227498480	227499480
Chr1	227503433	227504433
Chr1	227509725	227510725
Chr1	227652654	227653654
Chr1	227728778	227729778
Chr1	227916652	227917652
Chr1	227916965	227917965
Chr1	227976721	227977721
Chr1	228248662	228249662
Chr1	228285282	228286282
Chr1	228352248	228353248
Chr1	228360776	228361776
Chr1	228372593	228373593
Chr1	228389485	228390485
Chr1	228496414	228497414
Chr1	228554215	228555215
Chr1	228567666	228568666
Chr1	228661971	228662971
Chr1	228666552	228667552
Chr1	228681086	228682086
Chr1	228713577	228714577
Chr1	228785582	228786582
Chr1	228965753	228966753
Chr1	229079015	229080015
Chr1	229163942	229164942
Chr1	229228480	229229480
Chr1	229286008	229287008
Chr1	229307405	229308405
Chr1	229365324	229366324
Chr1	229384863	229385863
Chr1	229466883	229467883
Chr1	229482952	229483952
Chr1	229499139	229500139
Chr1	230139982	230140982
Chr1	230245329	230246329
Chr1	230245720	230246720
Chr1	230277402	230278402
Chr1	230366456	230367456
Chr1	230550107	230551107
Chr1	230832158	230833158
Chr1	230833535	230834535
Chr1	230908539	230909539
Chr1	230999719	231000719
Chr1	231761332	231762332
Chr1	231934894	231935894
Chr1	232182942	232183942
Chr1	232211519	232212519
Chr1	232220214	232221214
Chr1	232254108	232255108
Chr1	232273530	232274530
Chr1	232278282	232279282
Chr1	232278788	232279788
Chr1	232286862	232287862
Chr1	232346580	232347580
Chr1	232441591	232442591
Chr1	232493247	232494247
Chr1	232684322	232685322
Chr1	232747282	232748282
Chr1	232755614	232756614
Chr1	233318056	233319056
Chr1	233323559	233324559
Chr1	233413664	233414664
Chr1	233426287	233427287
[truncated: 150,385 more rows]

## Sheet: enhancers in ESC
Chromosome	start	end
Chr1	713623	714623
Chr1	714095	715095
Chr1	762201	763201
Chr1	762405	763405
Chr1	766306	767306
Chr1	779732	780732
Chr1	780737	781737
Chr1	855852	856852
Chr1	856141	857141
Chr1	870717	871717
Chr1	870888	871888
Chr1	871099	872099
Chr1	876732	877732
Chr1	886449	887449
Chr1	893891	894891
Chr1	894197	895197
Chr1	895447	896447
Chr1	901075	902075
Chr1	901285	902285
Chr1	901862	902862
Chr1	911049	912049
Chr1	911421	912421
Chr1	918876	919876
Chr1	919314	920314
Chr1	934584	935584
Chr1	935053	936053
Chr1	935470	936470
Chr1	935780	936780
Chr1	936785	937785
Chr1	940450	941450
Chr1	948299	949299
Chr1	948673	949673
Chr1	949389	950389
Chr1	950313	951313
Chr1	950480	951480
Chr1	951137	952137
Chr1	954561	955561
Chr1	955152	956152
Chr1	955538	956538
Chr1	956143	957143
Chr1	958671	959671
Chr1	959660	960660
Chr1	968061	969061
Chr1	968407	969407
Chr1	968614	969614
Chr1	968901	969901
Chr1	970226	971226
Chr1	975882	976882
Chr1	986112	987112
Chr1	994122	995122
Chr1	994434	995434
Chr1	994797	995797
Chr1	998636	999636
Chr1	998984	999984
Chr1	1004092	1005092
Chr1	1004526	1005526
Chr1	1014615	1015615
Chr1	1015277	1016277
Chr1	1015978	1016978
Chr1	1051072	1052072
Chr1	1057118	1058118
Chr1	1057371	1058371
Chr1	1058018	1059018
Chr1	1067587	1068587
Chr1	1070513	1071513
Chr1	1071459	1072459
Chr1	1071826	1072826
Chr1	1072610	1073610
Chr1	1072828	1073828
Chr1	1079290	1080290
Chr1	1079487	1080487
Chr1	1092126	1093126
Chr1	1092522	1093522
Chr1	1092962	1093962
Chr1	1093181	1094181
Chr1	1093348	1094348
Chr1	1093483	1094483
Chr1	1097716	1098716
Chr1	1099645	1100645
Chr1	1099947	1100947
Chr1	1100250	1101250
Chr1	1105519	1106519
Chr1	1108836	1109836
Chr1	1109230	1110230
Chr1	1109508	1110508
Chr1	1111421	1112421
Chr1	1111740	1112740
Chr1	1115448	1116448
Chr1	1140835	1141835
Chr1	1148999	1149999
Chr1	1153479	1154479
Chr1	1166934	1167934
Chr1	1167332	1168332
Chr1	1179534	1180534
Chr1	1181272	1182272
Chr1	1182053	1183053
Chr1	1182925	1183925
Chr1	1208841	1209841
Chr1	1209129	1210129
Chr1	1218717	1219717
Chr1	1218891	1219891
Chr1	1220122	1221122
Chr1	1225199	1226199
Chr1	1226640	1227640
Chr1	1226891	1227891
Chr1	1227185	1228185
Chr1	1228849	1229849
Chr1	1236978	1237978
Chr1	1237968	1238968
Chr1	1239697	1240697
Chr1	1240034	1241034
Chr1	1240249	1241249
Chr1	1240633	1241633
Chr1	1241161	1242161
Chr1	1243252	1244252
Chr1	1244753	1245753
Chr1	1244941	1245941
Chr1	1250260	1251260
Chr1	1250517	1251517
Chr1	1250847	1251847
Chr1	1253294	1254294
Chr1	1259615	1260615
Chr1	1259962	1260962
Chr1	1272807	1273807
Chr1	1279674	1280674
Chr1	1280589	1281589
Chr1	1282731	1283731
Chr1	1283036	1284036
Chr1	1283292	1284292
Chr1	1284259	1285259
Chr1	1284406	1285406
Chr1	1284755	1285755
Chr1	1286713	1287713
Chr1	1286955	1287955
Chr1	1287458	1288458
Chr1	1288677	1289677
Chr1	1289014	1290014
Chr1	1290580	1291580
Chr1	1292898	1293898
Chr1	1293117	1294117
Chr1	1293519	1294519
Chr1	1294403	1295403
Chr1	1294876	1295876
Chr1	1295587	1296587
Chr1	1296176	1297176
Chr1	1296344	1297344
Chr1	1297024	1298024
Chr1	1309611	1310611
Chr1	1310255	1311255
Chr1	1311428	1312428
Chr1	1334425	1335425
Chr1	1337055	1338055
Chr1	1342199	1343199
Chr1	1345273	1346273
Chr1	1345440	1346440
Chr1	1345724	1346724
Chr1	1350614	1351614
Chr1	1352467	1353467
Chr1	1356932	1357932
Chr1	1357808	1358808
Chr1	1360430	1361430
Chr1	1360667	1361667
Chr1	1360969	1361969
Chr1	1361886	1362886
Chr1	1362220	1363220
Chr1	1362488	1363488
Chr1	1362865	1363865
Chr1	1365629	1366629
Chr1	1366943	1367943
Chr1	1367175	1368175
Chr1	1368166	1369166
Chr1	1368493	1369493
Chr1	1368825	1369825
Chr1	1369149	1370149
Chr1	1369472	1370472
Chr1	1369983	1370983
Chr1	1370307	1371307
Chr1	1375692	1376692
Chr1	1375917	1376917
Chr1	1405622	1406622
Chr1	1406009	1407009
Chr1	1406499	1407499
Chr1	1407953	1408953
Chr1	1408448	1409448
Chr1	1446073	1447073
Chr1	1446782	1447782
Chr1	1474311	1475311
Chr1	1474694	1475694
Chr1	1474817	1475817
Chr1	1475122	1476122
Chr1	1475591	1476591
Chr1	1475994	1476994
Chr1	1476161	1477161
Chr1	1486032	1487032
Chr1	1486235	1487235
Chr1	1502867	1503867
Chr1	1508914	1509914
Chr1	1509212	1510212
Chr1	1509511	1510511
Chr1	1509812	1510812
Chr1	1510134	1511134
Chr1	1529613	1530613
Chr1	1532671	1533671
Chr1	1549338	1550338
Chr1	1549482	1550482
Chr1	1550400	1551400
Chr1	1555127	1556127
Chr1	1563687	1564687
Chr1	1564178	1565178
Chr1	1564679	1565679
Chr1	1564992	1565992
Chr1	1565294	1566294
Chr1	1566029	1567029
Chr1	1566579	1567579
Chr1	1566948	1567948
Chr1	1590053	1591053
Chr1	1596648	1597648
Chr1	1596814	1597814
Chr1	1609981	1610981
Chr1	1610318	1611318
Chr1	1614560	1615560
Chr1	1619234	1620234
Chr1	1623471	1624471
Chr1	1623746	1624746
Chr1	1623937	1624937
Chr1	1624099	1625099
Chr1	1655325	1656325
Chr1	1676744	1677744
Chr1	1677098	1678098
Chr1	1677397	1678397
Chr1	1679783	1680783
Chr1	1709456	1710456
Chr1	1709961	1710961
Chr1	1710473	1711473
Chr1	1710695	1711695
Chr1	1711036	1712036
Chr1	1711393	1712393
Chr1	1711607	1712607
Chr1	1712664	1713664
Chr1	1713148	1714148
Chr1	1713399	1714399
Chr1	1713564	1714564
Chr1	1713764	1714764
Chr1	1714041	1715041
Chr1	1727611	1728611
Chr1	1776690	1777690
Chr1	1779759	1780759
Chr1	1789774	1790774
Chr1	1790040	1791040
Chr1	1790391	1791391
Chr1	1790672	1791672
Chr1	1804890	1805890
Chr1	1812126	1813126
Chr1	1820924	1821924
Chr1	1822142	1823142
Chr1	1822606	1823606
Chr1	1826146	1827146
Chr1	1826388	1827388
Chr1	1828301	1829301
Chr1	1830321	1831321
Chr1	1837256	1838256
Chr1	1839638	1840638
Chr1	1839845	1840845
Chr1	1840165	1841165
Chr1	1849383	1850383
Chr1	1849556	1850556
Chr1	1850357	1851357
Chr1	1854649	1855649
Chr1	1860144	1861144
Chr1	1881025	1882025
Chr1	1885934	1886934
Chr1	1890872	1891872
Chr1	1891162	1892162
Chr1	1891436	1892436
Chr1	1896166	1897166
Chr1	1911497	1912497
Chr1	1929474	1930474
Chr1	1934781	1935781
Chr1	1935094	1936094
Chr1	1949454	1950454
Chr1	1949671	1950671
Chr1	1974533	1975533
Chr1	1975574	1976574
Chr1	1977617	1978617
Chr1	1978179	1979179
Chr1	1978432	1979432
Chr1	1978672	1979672
Chr1	1980849	1981849
Chr1	1981597	1982597
Chr1	2012228	2013228
Chr1	2022745	2023745
Chr1	2022916	2023916
Chr1	2035691	2036691
Chr1	2039720	2040720
Chr1	2047044	2048044
Chr1	2056643	2057643
Chr1	2056875	2057875
Chr1	2064422	2065422
Chr1	2096748	2097748
Chr1	2096911	2097911
Chr1	2104655	2105655
Chr1	2105422	2106422
Chr1	2119444	2120444
Chr1	2120560	2121560
Chr1	2120978	2121978
Chr1	2121225	2122225
Chr1	2126034	2127034
Chr1	2126547	2127547
Chr1	2130426	2131426
Chr1	2135594	2136594
Chr1	2135970	2136970
Chr1	2138750	2139750
Chr1	2141139	2142139
Chr1	2141585	2142585
Chr1	2141920	2142920
Chr1	2143433	2144433
Chr1	2144017	2145017
Chr1	2154050	2155050
Chr1	2157715	2158715
Chr1	2158774	2159774
Chr1	2162917	2163917
Chr1	2168832	2169832
Chr1	2171708	2172708
Chr1	2177709	2178709
Chr1	2179338	2180338
Chr1	2182431	2183431
Chr1	2186875	2187875
Chr1	2198389	2199389
Chr1	2209280	2210280
Chr1	2210412	2211412
Chr1	2211374	2212374
Chr1	2221920	2222920
Chr1	2242612	2243612
Chr1	2244197	2245197
Chr1	2245244	2246244
Chr1	2245500	2246500
Chr1	2247370	2248370
Chr1	2248307	2249307
Chr1	2253328	2254328
Chr1	2253640	2254640
Chr1	2258886	2259886
Chr1	2268925	2269925
Chr1	2275183	2276183
Chr1	2275446	2276446
Chr1	2312859	2313859
Chr1	2322093	2323093
Chr1	2322631	2323631
Chr1	2323789	2324789
Chr1	2343004	2344004
Chr1	2343225	2344225
Chr1	2343603	2344603
Chr1	2343952	2344952
Chr1	2344631	2345631
Chr1	2345302	2346302
Chr1	2345568	2346568
Chr1	2361158	2362158
Chr1	2377591	2378591
Chr1	2398286	2399286
Chr1	2398574	2399574
Chr1	2399113	2400113
Chr1	2431493	2432493
Chr1	2435029	2436029
Chr1	2454818	2455818
Chr1	2457489	2458489
Chr1	2465965	2466965
Chr1	2472063	2473063
Chr1	2474839	2475839
Chr1	2477209	2478209
Chr1	2477925	2478925
Chr1	2478309	2479309
Chr1	2478514	2479514
Chr1	2478696	2479696
Chr1	2479088	2480088
Chr1	2479860	2480860
Chr1	2495850	2496850
Chr1	2514574	2515574
Chr1	2514947	2515947
Chr1	2516525	2517525
Chr1	2516810	2517810
Chr1	2517606	2518606
Chr1	2518432	2519432
Chr1	2542250	2543250
Chr1	2564065	2565065
Chr1	2573600	2574600
Chr1	2573960	2574960
Chr1	2574227	2575227
Chr1	2574508	2575508
Chr1	2574741	2575741
Chr1	2702863	2703863
Chr1	2704783	2705783
Chr1	2717688	2718688
Chr1	2717859	2718859
Chr1	2756644	2757644
Chr1	2799183	2800183
Chr1	2830939	2831939
Chr1	2862507	2863507
Chr1	2897659	2898659
Chr1	2937408	2938408
Chr1	2937691	2938691
Chr1	2984038	2985038
Chr1	2984724	2985724
Chr1	2985253	2986253
Chr1	2985794	2986794
Chr1	2986481	2987481
Chr1	2986901	2987901
Chr1	3021717	3022717
Chr1	3036104	3037104
Chr1	3037724	3038724
Chr1	3046016	3047016
Chr1	3051886	3052886
Chr1	3077782	3078782
Chr1	3102765	3103765
Chr1	3135512	3136512
Chr1	3138178	3139178
Chr1	3154026	3155026
Chr1	3156938	3157938
Chr1	3157149	3158149
Chr1	3163739	3164739
Chr1	3201386	3202386
Chr1	3202490	3203490
Chr1	3229399	3230399
Chr1	3229778	3230778
Chr1	3236154	3237154
Chr1	3239463	3240463
Chr1	3265926	3266926
Chr1	3267083	3268083
Chr1	3268080	3269080
Chr1	3268710	3269710
Chr1	3269325	3270325
Chr1	3271328	3272328
Chr1	3273393	3274393
Chr1	3285314	3286314
Chr1	3303526	3304526
Chr1	3308023	3309023
Chr1	3309066	3310066
Chr1	3309448	3310448
Chr1	3309686	3310686
Chr1	3309992	3310992
Chr1	3312175	3313175
Chr1	3319829	3320829
Chr1	3326367	3327367
Chr1	3347504	3348504
Chr1	3369363	3370363
Chr1	3370779	3371779
Chr1	3371482	3372482
Chr1	3387665	3388665
Chr1	3388035	3389035
Chr1	3398751	3399751
Chr1	3400068	3401068
Chr1	3407481	3408481
Chr1	3407705	3408705
Chr1	3407950	3408950
Chr1	3446611	3447611
Chr1	3447533	3448533
Chr1	3449671	3450671
Chr1	3459920	3460920
Chr1	3463682	3464682
Chr1	3507302	3508302
Chr1	3507719	3508719
Chr1	3510040	3511040
Chr1	3513909	3514909
Chr1	3514153	3515153
Chr1	3514458	3515458
Chr1	3514714	3515714
Chr1	3514879	3515879
Chr1	3523755	3524755
Chr1	3526732	3527732
Chr1	3527139	3528139
Chr1	3527363	3528363
Chr1	3527717	3528717
Chr1	3528009	3529009
Chr1	3528212	3529212
Chr1	3529654	3530654
Chr1	3529860	3530860
Chr1	3530006	3531006
Chr1	3531399	3532399
Chr1	3531589	3532589
Chr1	3540610	3541610
Chr1	3540926	3541926
Chr1	3541861	3542861
Chr1	3566241	3567241
Chr1	3567998	3568998
Chr1	3568168	3569168
Chr1	3573762	3574762
Chr1	3587721	3588721
Chr1	3588941	3589941
Chr1	3590377	3591377
Chr1	3590612	3591612
Chr1	3590929	3591929
Chr1	3591467	3592467
Chr1	3594575	3595575
Chr1	3600301	3601301
Chr1	3603754	3604754
Chr1	3603956	3604956
Chr1	3604579	3605579
Chr1	3611861	3612861
Chr1	3623508	3624508
Chr1	3625065	3626065
Chr1	3625247	3626247
Chr1	3633584	3634584
Chr1	3634241	3635241
Chr1	3635576	3636576
Chr1	3636345	3637345
Chr1	3649073	3650073
Chr1	3649436	3650436
Chr1	3649554	3650554
Chr1	3650086	3651086
Chr1	3662625	3663625
Chr1	3662960	3663960
Chr1	3663242	3664242
Chr1	3663514	3664514
Chr1	3688536	3689536
Chr1	3689440	3690440
Chr1	3691714	3692714
Chr1	3692197	3693197
Chr1	3701691	3702691
Chr1	3709730	3710730
Chr1	3712637	3713637
Chr1	3712981	3713981
Chr1	3713194	3714194
Chr1	3713523	3714523
Chr1	3717657	3718657
Chr1	3727562	3728562
Chr1	3743989	3744989
Chr1	3773501	3774501
Chr1	3773939	3774939
Chr1	3786811	3787811
Chr1	3816328	3817328
Chr1	3817465	3818465
Chr1	3823473	3824473
Chr1	3827124	3828124
Chr1	3829660	3830660
Chr1	3838504	3839504
Chr1	4076476	4077476
Chr1	4077205	4078205
Chr1	4087284	4088284
Chr1	4087509	4088509
Chr1	4093517	4094517
Chr1	4197772	4198772
Chr1	4209607	4210607
Chr1	4210020	4211020
Chr1	4273293	4274293
Chr1	4335986	4336986
Chr1	4379143	4380143
Chr1	4422348	4423348
Chr1	4456313	4457313
Chr1	4482276	4483276
Chr1	4485666	4486666
Chr1	4507559	4508559
Chr1	4507800	4508800
Chr1	4529314	4530314
Chr1	4545263	4546263
Chr1	4623861	4624861
Chr1	4644994	4645994
Chr1	4654075	4655075
Chr1	4693025	4694025
Chr1	4694648	4695648
Chr1	4710764	4711764
Chr1	4712310	4713310
Chr1	4712751	4713751
Chr1	4717000	4718000
Chr1	4744571	4745571
Chr1	4768564	4769564
Chr1	4770638	4771638
Chr1	4770915	4771915
Chr1	4801764	4802764
Chr1	4805282	4806282
Chr1	4815109	4816109
Chr1	4885806	4886806
Chr1	4940323	4941323
Chr1	4990743	4991743
Chr1	4991148	4992148
Chr1	4992761	4993761
Chr1	5079197	5080197
Chr1	5079664	5080664
Chr1	5113520	5114520
Chr1	5149624	5150624
Chr1	5158773	5159773
Chr1	5159353	5160353
Chr1	5172451	5173451
Chr1	5178078	5179078
Chr1	5178471	5179471
Chr1	5178589	5179589
Chr1	5179174	5180174
Chr1	5179585	5180585
Chr1	5184976	5185976
Chr1	5221156	5222156
Chr1	5285642	5286642
Chr1	5295251	5296251
Chr1	5327177	5328177
Chr1	5327382	5328382
Chr1	5327608	5328608
Chr1	5334492	5335492
Chr1	5475393	5476393
Chr1	5484395	5485395
Chr1	5484622	5485622
Chr1	5484924	5485924
Chr1	5514866	5515866
Chr1	5569605	5570605
Chr1	5675771	5676771
Chr1	5680774	5681774
Chr1	5712217	5713217
Chr1	5727327	5728327
Chr1	5727724	5728724
Chr1	5764485	5765485
Chr1	5769789	5770789
Chr1	5777457	5778457
Chr1	5778897	5779897
Chr1	5805497	5806497
Chr1	5805812	5806812
Chr1	5807029	5808029
Chr1	5807226	5808226
Chr1	5810804	5811804
Chr1	5811615	5812615
Chr1	5812054	5813054
Chr1	5813666	5814666
Chr1	5826753	5827753
Chr1	5827745	5828745
Chr1	5830926	5831926
Chr1	5846517	5847517
Chr1	5857970	5858970
Chr1	5870487	5871487
Chr1	5883360	5884360
Chr1	5888061	5889061
Chr1	5890464	5891464
Chr1	5891724	5892724
Chr1	5892197	5893197
Chr1	5903777	5904777
Chr1	5919968	5920968
Chr1	5925485	5926485
Chr1	5948357	5949357
Chr1	5953417	5954417
Chr1	5956716	5957716
Chr1	5961704	5962704
Chr1	5975727	5976727
Chr1	6040275	6041275
Chr1	6051581	6052581
Chr1	6052257	6053257
Chr1	6053042	6054042
Chr1	6053328	6054328
Chr1	6053855	6054855
Chr1	6070395	6071395
Chr1	6085699	6086699
Chr1	6086006	6087006
Chr1	6095504	6096504
Chr1	6101191	6102191
Chr1	6112202	6113202
Chr1	6112460	6113460
Chr1	6112660	6113660
Chr1	6113105	6114105
Chr1	6114437	6115437
Chr1	6141981	6142981
Chr1	6169606	6170606
Chr1	6187693	6188693
Chr1	6201341	6202341
Chr1	6204419	6205419
Chr1	6230729	6231729
Chr1	6231271	6232271
Chr1	6239981	6240981
Chr1	6240997	6241997
Chr1	6243213	6244213
Chr1	6245060	6246060
Chr1	6245316	6246316
Chr1	6245522	6246522
Chr1	6259267	6260267
Chr1	6259576	6260576
Chr1	6259814	6260814
Chr1	6260253	6261253
Chr1	6264735	6265735
Chr1	6265754	6266754
Chr1	6270173	6271173
Chr1	6270398	6271398
Chr1	6286948	6287948
Chr1	6295654	6296654
Chr1	6297583	6298583
Chr1	6298322	6299322
Chr1	6298606	6299606
Chr1	6299039	6300039
Chr1	6299673	6300673
Chr1	6300052	6301052
Chr1	6300297	6301297
Chr1	6300919	6301919
Chr1	6301187	6302187
Chr1	6301682	6302682
Chr1	6302063	6303063
Chr1	6302653	6303653
Chr1	6303342	6304342
Chr1	6303656	6304656
Chr1	6304780	6305780
Chr1	6305705	6306705
Chr1	6306471	6307471
Chr1	6308298	6309298
Chr1	6308448	6309448
Chr1	6308668	6309668
Chr1	6309386	6310386
Chr1	6319657	6320657
Chr1	6320012	6321012
Chr1	6320141	6321141
Chr1	6320703	6321703
Chr1	6321105	6322105
Chr1	6321397	6322397
Chr1	6322800	6323800
Chr1	6328156	6329156
Chr1	6332632	6333632
Chr1	6333073	6334073
Chr1	6395235	6396235
Chr1	6395495	6396495
Chr1	6398437	6399437
Chr1	6403190	6404190
Chr1	6407691	6408691
Chr1	6409011	6410011
Chr1	6411919	6412919
Chr1	6417039	6418039
Chr1	6417340	6418340
Chr1	6417775	6418775
Chr1	6418600	6419600
Chr1	6418991	6419991
Chr1	6419380	6420380
Chr1	6437937	6438937
Chr1	6444945	6445945
Chr1	6445486	6446486
Chr1	6451941	6452941
Chr1	6453331	6454331
Chr1	6456763	6457763
Chr1	6464435	6465435
Chr1	6474098	6475098
Chr1	6479249	6480249
Chr1	6479694	6480694
Chr1	6489738	6490738
Chr1	6494798	6495798
Chr1	6499965	6500965
Chr1	6500332	6501332
Chr1	6506746	6507746
Chr1	6507511	6508511
Chr1	6507878	6508878
Chr1	6508700	6509700
Chr1	6510638	6511638
Chr1	6514109	6515109
Chr1	6514956	6515956
Chr1	6519580	6520580
Chr1	6519904	6520904
Chr1	6520053	6521053
Chr1	6525326	6526326
Chr1	6525838	6526838
Chr1	6530319	6531319
Chr1	6531199	6532199
Chr1	6532215	6533215
Chr1	6533946	6534946
Chr1	6534622	6535622
Chr1	6535012	6536012
Chr1	6535250	6536250
Chr1	6535598	6536598
Chr1	6542797	6543797
Chr1	6544516	6545516
Chr1	6546159	6547159
Chr1	6549593	6550593
Chr1	6549852	6550852
Chr1	6550160	6551160
Chr1	6550445	6551445
Chr1	6550633	6551633
Chr1	6550850	6551850
Chr1	6551076	6552076
Chr1	6555312	6556312
Chr1	6556099	6557099
Chr1	6557042	6558042
Chr1	6557321	6558321
Chr1	6573107	6574107
Chr1	6579652	6580652
Chr1	6579989	6580989
Chr1	6583371	6584371
Chr1	6613646	6614646
Chr1	6614143	6615143
Chr1	6621585	6622585
Chr1	6639472	6640472
Chr1	6644902	6645902
Chr1	6660696	6661696
Chr1	6662634	6663634
Chr1	6663752	6664752
Chr1	6669356	6670356
Chr1	6672544	6673544
Chr1	6672780	6673780
Chr1	6673161	6674161
Chr1	6673645	6674645
Chr1	6673941	6674941
Chr1	6674340	6675340
Chr1	6675296	6676296
Chr1	6684517	6685517
Chr1	6685110	6686110
Chr1	6694317	6695317
Chr1	6706383	6707383
Chr1	6753856	6754856
Chr1	6760475	6761475
Chr1	6761479	6762479
Chr1	6790153	6791153
Chr1	6817848	6818848
Chr1	6843856	6844856
Chr1	6844566	6845566
Chr1	6845813	6846813
Chr1	6847800	6848800
Chr1	6853907	6854907
Chr1	6926542	6927542
Chr1	6932984	6933984
Chr1	6965131	6966131
Chr1	6966522	6967522
Chr1	6972582	6973582
Chr1	6987553	6988553
Chr1	7014306	7015306
Chr1	7016486	7017486
Chr1	7021495	7022495
Chr1	7022394	7023394
Chr1	7039007	7040007
Chr1	7049286	7050286
Chr1	7049502	7050502
Chr1	7055564	7056564
Chr1	7081834	7082834
Chr1	7102420	7103420
Chr1	7103537	7104537
Chr1	7104204	7105204
Chr1	7129692	7130692
Chr1	7130181	7131181
Chr1	7143970	7144970
Chr1	7177374	7178374
Chr1	7195170	7196170
Chr1	7199981	7200981
Chr1	7209069	7210069
Chr1	7209277	7210277
Chr1	7209594	7210594
Chr1	7237573	7238573
Chr1	7238056	7239056
Chr1	7246446	7247446
Chr1	7258552	7259552
Chr1	7277973	7278973
Chr1	7284492	7285492
Chr1	7305643	7306643
Chr1	7316463	7317463
Chr1	7321245	7322245
Chr1	7357146	7358146
Chr1	7357844	7358844
Chr1	7359133	7360133
Chr1	7405933	7406933
Chr1	7439265	7440265
Chr1	7448589	7449589
Chr1	7458783	7459783
Chr1	7461533	7462533
Chr1	7513827	7514827
Chr1	7520513	7521513
Chr1	7534869	7535869
Chr1	7542695	7543695
Chr1	7547318	7548318
Chr1	7560882	7561882
Chr1	7576048	7577048
Chr1	7595938	7596938
Chr1	7596268	7597268
Chr1	7596686	7597686
Chr1	7596890	7597890
Chr1	7599457	7600457
Chr1	7609832	7610832
Chr1	7610236	7611236
Chr1	7611178	7612178
Chr1	7621149	7622149
Chr1	7668540	7669540
Chr1	7697867	7698867
Chr1	7703839	7704839
Chr1	7706963	7707963
Chr1	7707293	7708293
Chr1	7727043	7728043
Chr1	7727421	7728421
Chr1	7728213	7729213
Chr1	7729244	7730244
Chr1	7730110	7731110
Chr1	7740247	7741247
Chr1	7740532	7741532
Chr1	7762085	7763085
Chr1	7762749	7763749
Chr1	7763112	7764112
Chr1	7763487	7764487
Chr1	7763661	7764661
Chr1	7764301	7765301
Chr1	7811913	7812913
Chr1	7812224	7813224
Chr1	7812522	7813522
Chr1	7815231	7816231
Chr1	7830801	7831801
Chr1	7831434	7832434
Chr1	7843494	7844494
Chr1	7844219	7845219
Chr1	7844575	7845575
Chr1	7844874	7845874
Chr1	7854907	7855907
Chr1	7867994	7868994
Chr1	7945227	7946227
Chr1	7945634	7946634
Chr1	7971911	7972911
Chr1	7972704	7973704
Chr1	7972829	7973829
Chr1	8013810	8014810
Chr1	8020377	8021377
Chr1	8020781	8021781
Chr1	8021092	8022092
Chr1	8042064	8043064
Chr1	8051552	8052552
Chr1	8074775	8075775
Chr1	8078529	8079529
Chr1	8086043	8087043
Chr1	8087290	8088290
Chr1	8130054	8131054
Chr1	8130239	8131239
Chr1	8135548	8136548
Chr1	8135953	8136953
Chr1	8136836	8137836
Chr1	8138223	8139223
Chr1	8181089	8182089
Chr1	8215298	8216298
Chr1	8225390	8226390
Chr1	8225642	8226642
Chr1	8226897	8227897
Chr1	8251117	8252117
Chr1	8261023	8262023
Chr1	8261224	8262224
Chr1	8262054	8263054
Chr1	8274534	8275534
Chr1	8276686	8277686
Chr1	8298695	8299695
Chr1	8299390	8300390
Chr1	8299870	8300870
Chr1	8319139	8320139
Chr1	8326175	8327175
Chr1	8326635	8327635
Chr1	8336282	8337282
Chr1	8361945	8362945
Chr1	8374740	8375740
Chr1	8378452	8379452
Chr1	8408744	8409744
Chr1	8411396	8412396
Chr1	8411682	8412682
Chr1	8411877	8412877
Chr1	8419025	8420025
Chr1	8420888	8421888
Chr1	8430143	8431143
Chr1	8431780	8432780
Chr1	8433319	8434319
Chr1	8433545	8434545
Chr1	8434573	8435573
Chr1	8441756	8442756
Chr1	8445159	8446159
Chr1	8456010	8457010
Chr1	8458425	8459425
Chr1	8467431	8468431
Chr1	8467690	8468690
Chr1	8468949	8469949
Chr1	8469747	8470747
Chr1	8482567	8483567
Chr1	8482813	8483813
Chr1	8483677	8484677
Chr1	8484275	8485275
Chr1	8490755	8491755
Chr1	8496923	8497923
Chr1	8497137	8498137
Chr1	8498694	8499694
Chr1	8499213	8500213
Chr1	8501063	8502063
Chr1	8503239	8504239
Chr1	8503593	8504593
Chr1	8519808	8520808
Chr1	8520506	8521506
Chr1	8523110	8524110
Chr1	8523315	8524315
Chr1	8524150	8525150
Chr1	8524791	8525791
Chr1	8540609	8541609
Chr1	8577399	8578399
Chr1	8584982	8585982
Chr1	8585644	8586644
Chr1	8586659	8587659
Chr1	8657863	8658863
Chr1	8721042	8722042
Chr1	8723450	8724450
Chr1	8730488	8731488
Chr1	8731072	8732072
Chr1	8736254	8737254
Chr1	8749469	8750469
Chr1	8760667	8761667
Chr1	8760813	8761813
Chr1	8761175	8762175
Chr1	8761864	8762864
Chr1	8762053	8763053
Chr1	8762796	8763796
Chr1	8763325	8764325
Chr1	8764180	8765180
Chr1	8766656	8767656
Chr1	8772097	8773097
Chr1	8778744	8779744
Chr1	8786149	8787149
Chr1	8790892	8791892
Chr1	8793194	8794194
Chr1	8799113	8800113
Chr1	8814687	8815687
Chr1	8823710	8824710
Chr1	8843137	8844137
Chr1	8849277	8850277
Chr1	8849680	8850680
Chr1	8854346	8855346
Chr1	8856588	8857588
Chr1	8874610	8875610
Chr1	8876936	8877936
Chr1	8877382	8878382
Chr1	8885838	8886838
Chr1	8891050	8892050
Chr1	8905090	8906090
Chr1	8908591	8909591
Chr1	8908915	8909915
Chr1	8914102	8915102
Chr1	8914263	8915263
Chr1	8916498	8917498
Chr1	8917793	8918793
Chr1	8919149	8920149
Chr1	8920877	8921877
Chr1	8922233	8923233
Chr1	8923380	8924380
Chr1	8931288	8932288
Chr1	8933248	8934248
Chr1	8936470	8937470
Chr1	8937638	8938638
Chr1	8938662	8939662
Chr1	8939863	8940863
Chr1	8953114	8954114
Chr1	8971136	8972136
Chr1	9003073	9004073
Chr1	9003283	9004283
Chr1	9011008	9012008
Chr1	9022719	9023719
Chr1	9047396	9048396
Chr1	9047745	9048745
Chr1	9064179	9065179
Chr1	9064745	9065745
Chr1	9069200	9070200
Chr1	9069699	9070699
Chr1	9085479	9086479
Chr1	9093147	9094147
Chr1	9110963	9111963
Chr1	9111107	9112107
Chr1	9111215	9112215
Chr1	9123948	9124948
Chr1	9126911	9127911
Chr1	9129086	9130086
Chr1	9160984	9161984
Chr1	9161287	9162287
Chr1	9161585	9162585
Chr1	9164216	9165216
Chr1	9170474	9171474
Chr1	9187876	9188876
Chr1	9188761	9189761
Chr1	9189198	9190198
Chr1	9201938	9202938
Chr1	9225114	9226114
Chr1	9225287	9226287
Chr1	9226461	9227461
Chr1	9241138	9242138
Chr1	9241854	9242854
Chr1	9246329	9247329
Chr1	9256189	9257189
Chr1	9293970	9294970
Chr1	9294383	9295383
Chr1	9294578	9295578
Chr1	9294810	9295810
Chr1	9307004	9308004
Chr1	9309787	9310787
Chr1	9310219	9311219
Chr1	9310378	9311378
Chr1	9312761	9313761
Chr1	9320177	9321177
Chr1	9326847	9327847
Chr1	9336471	9337471
Chr1	9338948	9339948
Chr1	9339188	9340188
Chr1	9340149	9341149
Chr1	9340613	9341613
Chr1	9351705	9352705
Chr1	9351921	9352921
Chr1	9352173	9353173
Chr1	9352398	9353398
Chr1	9379686	9380686
Chr1	9379889	9380889
Chr1	9380140	9381140
Chr1	9380535	9381535
Chr1	9380802	9381802
Chr1	9431116	9432116
Chr1	9446088	9447088
Chr1	9464301	9465301
Chr1	9472840	9473840
Chr1	9473161	9474161
Chr1	9473450	9474450
Chr1	9488430	9489430
Chr1	9501394	9502394
Chr1	9536526	9537526
Chr1	9550762	9551762
Chr1	9554813	9555813
Chr1	9555267	9556267
Chr1	9598905	9599905
Chr1	9599401	9600401
Chr1	9599618	9600618
Chr1	9599850	9600850
Chr1	9606396	9607396
Chr1	9633455	9634455
Chr1	9647877	9648877
Chr1	9648255	9649255
Chr1	9649532	9650532
Chr1	9653210	9654210
Chr1	9653614	9654614
Chr1	9708019	9709019
Chr1	9709455	9710455
Chr1	9711738	9712738
Chr1	9715096	9716096
Chr1	9733559	9734559
Chr1	9746952	9747952
Chr1	9747214	9748214
Chr1	9748919	9749919
Chr1	9749615	9750615
Chr1	9750236	9751236
Chr1	9750831	9751831
Chr1	9753559	9754559
Chr1	9760226	9761226
Chr1	9761943	9762943
Chr1	9773627	9774627
Chr1	9774150	9775150
Chr1	9776741	9777741
Chr1	9777059	9778059
Chr1	9777358	9778358
Chr1	9778869	9779869
Chr1	9780068	9781068
Chr1	9780803	9781803
Chr1	9780985	9781985
Chr1	9781217	9782217
Chr1	9781486	9782486
Chr1	9784495	9785495
Chr1	9784721	9785721
Chr1	9786227	9787227
Chr1	9820618	9821618
Chr1	9823889	9824889
Chr1	9827917	9828917
Chr1	9828600	9829600
Chr1	9835937	9836937
Chr1	9844300	9845300
Chr1	9848556	9849556
Chr1	9864953	9865953
Chr1	9883638	9884638
Chr1	9885193	9886193
Chr1	9887282	9888282
Chr1	9887607	9888607
Chr1	9890531	9891531
Chr1	9895061	9896061
Chr1	9895416	9896416
Chr1	9909604	9910604
Chr1	9909852	9910852
Chr1	9910405	9911405
Chr1	9910707	9911707
Chr1	9919020	9920020
Chr1	9921095	9922095
Chr1	9927231	9928231
Chr1	9934349	9935349
Chr1	9934651	9935651
Chr1	9934951	9935951
Chr1	9935334	9936334
Chr1	9949879	9950879
Chr1	9969435	9970435
Chr1	9970138	9971138
Chr1	9970718	9971718
Chr1	9989146	9990146
Chr1	10002145	10003145
Chr1	10002824	10003824
Chr1	10010163	10011163
Chr1	10020886	10021886
Chr1	10056623	10057623
Chr1	10056905	10057905
Chr1	10092465	10093465
Chr1	10093231	10094231
Chr1	10094236	10095236
Chr1	10125150	10126150
Chr1	10128406	10129406
Chr1	10212628	10213628
Chr1	10238711	10239711
Chr1	10269769	10270769
Chr1	10270747	10271747
Chr1	10271082	10272082
Chr1	10377880	10378880
Chr1	10379645	10380645
Chr1	10397787	10398787
Chr1	10399567	10400567
Chr1	10407299	10408299
Chr1	10413028	10414028
Chr1	10438247	10439247
Chr1	10447463	10448463
Chr1	10458561	10459561
Chr1	10474910	10475910
Chr1	10490246	10491246
Chr1	10490805	10491805
Chr1	10531422	10532422
Chr1	10531660	10532660
Chr1	10532037	10533037
Chr1	10534723	10535723
Chr1	10535213	10536213
Chr1	10554352	10555352
Chr1	10568309	10569309
Chr1	10575068	10576068
Chr1	10578894	10579894
Chr1	10589521	10590521
Chr1	10590045	10591045
Chr1	10590353	10591353
Chr1	10590562	10591562
Chr1	10600387	10601387
Chr1	10601086	10602086
Chr1	10616140	10617140
Chr1	10621701	10622701
Chr1	10637819	10638819
Chr1	10639240	10640240
Chr1	10654405	10655405
Chr1	10657750	10658750
Chr1	10658078	10659078
Chr1	10689719	10690719
Chr1	10691638	10692638
Chr1	10691770	10692770
Chr1	10692097	10693097
Chr1	10692574	10693574
Chr1	10694469	10695469
Chr1	10698361	10699361
Chr1	10699758	10700758
Chr1	10706107	10707107
Chr1	10708704	10709704
Chr1	10708961	10709961
Chr1	10709181	10710181
Chr1	10709449	10710449
Chr1	10710281	10711281
Chr1	10711125	10712125
Chr1	10711588	10712588
Chr1	10723397	10724397
Chr1	10737401	10738401
Chr1	10739363	10740363
Chr1	10739656	10740656
Chr1	10742747	10743747
Chr1	10742901	10743901
Chr1	10745251	10746251
Chr1	10746297	10747297
Chr1	10752115	10753115
Chr1	10753409	10754409
Chr1	10753695	10754695
Chr1	10754044	10755044
Chr1	10754346	10755346
Chr1	10754666	10755666
Chr1	10754923	10755923
Chr1	10763707	10764707
Chr1	10764207	10765207
Chr1	10764559	10765559
Chr1	10768175	10769175
Chr1	10769478	10770478
Chr1	10774137	10775137
Chr1	10774379	10775379
Chr1	10774683	10775683
Chr1	10781406	10782406
Chr1	10781703	10782703
Chr1	10782331	10783331
Chr1	10788285	10789285
Chr1	10788798	10789798
Chr1	10793751	10794751
Chr1	10794927	10795927
Chr1	10797880	10798880
Chr1	10798227	10799227
Chr1	10812954	10813954
Chr1	10831655	10832655
Chr1	10838215	10839215
Chr1	10848194	10849194
Chr1	10848457	10849457
Chr1	10852938	10853938
Chr1	10853894	10854894
Chr1	10854144	10855144
Chr1	10854367	10855367
Chr1	10854642	10855642
Chr1	10856616	10857616
Chr1	10859448	10860448
Chr1	10874726	10875726
Chr1	10875111	10876111
Chr1	10894387	10895387
Chr1	10895462	10896462
Chr1	10896532	10897532
Chr1	10896830	10897830
Chr1	10898210	10899210
Chr1	10899118	10900118
Chr1	10925764	10926764
Chr1	10926460	10927460
Chr1	10926814	10927814
Chr1	10926964	10927964
Chr1	10947635	10948635
Chr1	10947969	10948969
Chr1	10960030	10961030
Chr1	10960441	10961441
Chr1	10961212	10962212
Chr1	10994164	10995164
Chr1	10997014	10998014
Chr1	10997486	10998486
Chr1	11001647	11002647
Chr1	11005944	11006944
Chr1	11018142	11019142
Chr1	11018333	11019333
Chr1	11020699	11021699
Chr1	11029443	11030443
Chr1	11033262	11034262
Chr1	11035544	11036544
Chr1	11039094	11040094
Chr1	11039964	11040964
Chr1	11040350	11041350
Chr1	11040549	11041549
Chr1	11050409	11051409
Chr1	11071994	11072994
Chr1	11072464	11073464
Chr1	11072624	11073624
Chr1	11097369	11098369
Chr1	11105276	11106276
Chr1	11113500	11114500
Chr1	11114338	11115338
Chr1	11114609	11115609
Chr1	11158968	11159968
Chr1	11159445	11160445
Chr1	11159736	11160736
Chr1	11301438	11302438
Chr1	11307928	11308928
Chr1	11322274	11323274
Chr1	11332419	11333419
Chr1	11332728	11333728
Chr1	11333115	11334115
Chr1	11346324	11347324
Chr1	11359247	11360247
Chr1	11379954	11380954
Chr1	11384313	11385313
Chr1	11394017	11395017
Chr1	11397371	11398371
Chr1	11399539	11400539
Chr1	11411824	11412824
Chr1	11414959	11415959
Chr1	11415613	11416613
Chr1	11417256	11418256
Chr1	11423936	11424936
Chr1	11432767	11433767
Chr1	11434371	11435371
Chr1	11435509	11436509
Chr1	11440290	11441290
Chr1	11457231	11458231
Chr1	11458191	11459191
Chr1	11473278	11474278
Chr1	11473530	11474530
Chr1	11473817	11474817
Chr1	11477039	11478039
Chr1	11477208	11478208
Chr1	11538535	11539535
Chr1	11538946	11539946
Chr1	11540749	11541749
Chr1	11548778	11549778
Chr1	11558672	11559672
Chr1	11559212	11560212
Chr1	11559672	11560672
Chr1	11561164	11562164
Chr1	11580958	11581958
Chr1	11582232	11583232
Chr1	11618028	11619028
Chr1	11618381	11619381
Chr1	11624064	11625064
Chr1	11631945	11632945
Chr1	11653984	11654984
Chr1	11655103	11656103
Chr1	11677010	11678010
Chr1	11695633	11696633
Chr1	11697843	11698843
Chr1	11708337	11709337
Chr1	11708603	11709603
Chr1	11709404	11710404
Chr1	11712915	11713915
Chr1	11713575	11714575
Chr1	11714209	11715209
Chr1	11715010	11716010
Chr1	11715265	11716265
Chr1	11723682	11724682
Chr1	11724015	11725015
Chr1	11724367	11725367
Chr1	11724711	11725711
Chr1	11740042	11741042
Chr1	11740825	11741825
Chr1	11742186	11743186
Chr1	11749189	11750189
Chr1	11749505	11750505
Chr1	11750729	11751729
Chr1	11750892	11751892
Chr1	11751284	11752284
Chr1	11751670	11752670
Chr1	11757390	11758390
Chr1	11760447	11761447
Chr1	11764008	11765008
Chr1	11765046	11766046
Chr1	11767329	11768329
Chr1	11768677	11769677
Chr1	11770822	11771822
Chr1	11785210	11786210
Chr1	11785419	11786419
Chr1	11791507	11792507
Chr1	11795371	11796371
Chr1	11795700	11796700
Chr1	11796331	11797331
Chr1	11796820	11797820
Chr1	11808869	11809869
Chr1	11812381	11813381
Chr1	11822334	11823334
Chr1	11844525	11845525
Chr1	11844920	11845920
Chr1	11846324	11847324
Chr1	11846903	11847903
Chr1	11847263	11848263
Chr1	11847667	11848667
Chr1	11862428	11863428
Chr1	11862711	11863711
Chr1	11863191	11864191
Chr1	11865493	11866493
Chr1	11905280	11906280
Chr1	11942579	11943579
Chr1	11942933	11943933
Chr1	11948583	11949583
Chr1	11958639	11959639
Chr1	11967329	11968329
Chr1	11968272	11969272
Chr1	11968999	11969999
Chr1	11969266	11970266
Chr1	11969704	11970704
Chr1	11973057	11974057
Chr1	11986089	11987089
Chr1	11992433	11993433
Chr1	11993702	11994702
Chr1	11994335	11995335
Chr1	12003907	12004907
Chr1	12004101	12005101
Chr1	12004445	12005445
Chr1	12008815	12009815
Chr1	12026918	12027918
Chr1	12039700	12040700
Chr1	12040217	12041217
Chr1	12040385	12041385
Chr1	12061312	12062312
Chr1	12073946	12074946
Chr1	12074254	12075254
Chr1	12078926	12079926
Chr1	12079338	12080338
Chr1	12079623	12080623
Chr1	12090615	12091615
Chr1	12091024	12092024
Chr1	12110818	12111818
Chr1	12111811	12112811
Chr1	12112737	12113737
Chr1	12127403	12128403
Chr1	12138397	12139397
Chr1	12138668	12139668
Chr1	12139126	12140126
Chr1	12166565	12167565
Chr1	12178372	12179372
Chr1	12183425	12184425
Chr1	12201110	12202110
Chr1	12201958	12202958
Chr1	12206982	12207982
Chr1	12207161	12208161
Chr1	12228424	12229424
Chr1	12237175	12238175
Chr1	12247960	12248960
Chr1	12256367	12257367
Chr1	12256601	12257601
Chr1	12258748	12259748
Chr1	12259185	12260185
Chr1	12261899	12262899
Chr1	12263977	12264977
Chr1	12266696	12267696
Chr1	12268426	12269426
Chr1	12268662	12269662
Chr1	12289401	12290401
Chr1	12290592	12291592
Chr1	12290790	12291790
Chr1	12295312	12296312
Chr1	12299769	12300769
Chr1	12303857	12304857
Chr1	12308929	12309929
Chr1	12309545	12310545
Chr1	12335049	12336049
Chr1	12336022	12337022
Chr1	12399108	12400108
Chr1	12399503	12400503
Chr1	12465720	12466720
Chr1	12493205	12494205
Chr1	12493457	12494457
Chr1	12537997	12538997
Chr1	12570686	12571686
Chr1	12599856	12600856
Chr1	12600777	12601777
Chr1	12616190	12617190
Chr1	12616715	12617715
Chr1	12654768	12655768
Chr1	12655873	12656873
Chr1	12656111	12657111
Chr1	12661603	12662603
Chr1	12675625	12676625
Chr1	12676068	12677068
Chr1	12677113	12678113
Chr1	12677241	12678241
Chr1	12677756	12678756
Chr1	12678334	12679334
Chr1	12678474	12679474
Chr1	12678891	12679891
Chr1	12681746	12682746
Chr1	12689089	12690089
Chr1	12689564	12690564
Chr1	12694648	12695648
Chr1	12696178	12697178
Chr1	12696469	12697469
Chr1	12718685	12719685
Chr1	12777060	12778060
Chr1	12777204	12778204
Chr1	13795482	13796482
Chr1	13824795	13825795
Chr1	13870082	13871082
Chr1	13875642	13876642
Chr1	13896614	13897614
Chr1	13897146	13898146
Chr1	13907451	13908451
Chr1	13907666	13908666
Chr1	13909185	13910185
Chr1	13909733	13910733
Chr1	13911733	13912733
Chr1	13912082	13913082
Chr1	13919639	13920639
Chr1	13926922	13927922
Chr1	14025662	14026662
Chr1	14026208	14027208
Chr1	14050062	14051062
Chr1	14057085	14058085
Chr1	14074894	14075894
Chr1	14075310	14076310
Chr1	14075770	14076770
Chr1	14085323	14086323
Chr1	14087097	14088097
Chr1	14088454	14089454
Chr1	14090645	14091645
Chr1	14091134	14092134
Chr1	14114998	14115998
Chr1	14127945	14128945
Chr1	14137401	14138401
Chr1	14155052	14156052
Chr1	14242728	14243728
Chr1	14256364	14257364
Chr1	14291979	14292979
Chr1	14366331	14367331
Chr1	14405887	14406887
Chr1	14462287	14463287
Chr1	14462538	14463538
Chr1	14475634	14476634
Chr1	14491520	14492520
Chr1	14504014	14505014
Chr1	14507586	14508586
Chr1	14509509	14510509
Chr1	14608678	14609678
Chr1	14608851	14609851
Chr1	14617410	14618410
Chr1	14645612	14646612
Chr1	14646653	14647653
Chr1	14661068	14662068
Chr1	14699006	14700006
Chr1	14721803	14722803
Chr1	14730138	14731138
Chr1	14731091	14732091
Chr1	14741574	14742574
Chr1	14864549	14865549
Chr1	14898006	14899006
Chr1	14919534	14920534
Chr1	14919872	14920872
Chr1	14920760	14921760
Chr1	14923786	14924786
Chr1	14924106	14925106
Chr1	14924875	14925875
Chr1	14925381	14926381
Chr1	14925622	14926622
Chr1	14925922	14926922
Chr1	14932839	14933839
Chr1	15004186	15005186
Chr1	15012861	15013861
Chr1	15051814	15052814
Chr1	15058076	15059076
Chr1	15059191	15060191
Chr1	15059536	15060536
Chr1	15059904	15060904
Chr1	15060039	15061039
Chr1	15068326	15069326
Chr1	15068545	15069545
Chr1	15081709	15082709
Chr1	15085116	15086116
Chr1	15093170	15094170
Chr1	15105023	15106023
Chr1	15105400	15106400
Chr1	15109038	15110038
Chr1	15109322	15110322
Chr1	15159881	15160881
Chr1	15202350	15203350
Chr1	15236316	15237316
Chr1	15240160	15241160
Chr1	15240542	15241542
Chr1	15241549	15242549
Chr1	15269411	15270411
Chr1	15271120	15272120
Chr1	15271445	15272445
Chr1	15276265	15277265
Chr1	15287985	15288985
Chr1	15296333	15297333
Chr1	15301715	15302715
Chr1	15306959	15307959
Chr1	15309473	15310473
Chr1	15319613	15320613
Chr1	15322289	15323289
Chr1	15335027	15336027
Chr1	15353689	15354689
Chr1	15356941	15357941
Chr1	15372650	15373650
Chr1	15379465	15380465
Chr1	15416600	15417600
Chr1	15434091	15435091
Chr1	15434289	15435289
Chr1	15436967	15437967
Chr1	15438179	15439179
Chr1	15438441	15439441
Chr1	15454744	15455744
Chr1	15466002	15467002
Chr1	15478304	15479304
Chr1	15478579	15479579
Chr1	15478968	15479968
Chr1	15479223	15480223
Chr1	15479393	15480393
Chr1	15479691	15480691
Chr1	15483217	15484217
Chr1	15489319	15490319
Chr1	15505091	15506091
Chr1	15505400	15506400
Chr1	15512976	15513976
Chr1	15523210	15524210
Chr1	15533036	15534036
Chr1	15533651	15534651
Chr1	15540675	15541675
Chr1	15571035	15572035
Chr1	15573162	15574162
Chr1	15573466	15574466
Chr1	15605710	15606710
Chr1	15609210	15610210
Chr1	15630855	15631855
Chr1	15690950	15691950
Chr1	15710649	15711649
Chr1	15712367	15713367
Chr1	15712657	15713657
Chr1	15714470	15715470
Chr1	15735653	15736653
Chr1	15736827	15737827
Chr1	15736955	15737955
Chr1	15752482	15753482
Chr1	15753143	15754143
Chr1	15756997	15757997
Chr1	15757287	15758287
Chr1	15803094	15804094
Chr1	15827606	15828606
Chr1	15835056	15836056
Chr1	15849910	15850910
Chr1	15850760	15851760
Chr1	15851771	15852771
Chr1	15852202	15853202
Chr1	15852816	15853816
Chr1	15910575	15911575
Chr1	15911071	15912071
Chr1	15929168	15930168
Chr1	15929668	15930668
Chr1	15943162	15944162
Chr1	15944184	15945184
Chr1	15995224	15996224
Chr1	16010283	16011283
Chr1	16011030	16012030
Chr1	16029240	16030240
Chr1	16029804	16030804
Chr1	16058140	16059140
Chr1	16062241	16063241
Chr1	16067588	16068588
Chr1	16067833	16068833
Chr1	16068551	16069551
Chr1	16068821	16069821
Chr1	16082603	16083603
Chr1	16083465	16084465
Chr1	16083841	16084841
Chr1	16084496	16085496
Chr1	16085731	16086731
Chr1	16086799	16087799
Chr1	16086955	16087955
Chr1	16120230	16121230
Chr1	16125176	16126176
Chr1	16126448	16127448
Chr1	16127053	16128053
Chr1	16129576	16130576
Chr1	16135146	16136146
Chr1	16141602	16142602
Chr1	16159568	16160568
Chr1	16159825	16160825
Chr1	16160172	16161172
Chr1	16161284	16162284
Chr1	16164925	16165925
Chr1	16173485	16174485
Chr1	16174112	16175112
Chr1	16174743	16175743
Chr1	16175108	16176108
Chr1	16175536	16176536
Chr1	16176038	16177038
Chr1	16177431	16178431
Chr1	16202582	16203582
Chr1	16212352	16213352
Chr1	16250612	16251612
Chr1	16250897	16251897
Chr1	16263803	16264803
Chr1	16264016	16265016
Chr1	16274051	16275051
Chr1	16275107	16276107
Chr1	16275818	16276818
Chr1	16277419	16278419
Chr1	16280141	16281141
Chr1	16280472	16281472
Chr1	16283923	16284923
Chr1	16287666	16288666
Chr1	16301614	16302614
Chr1	16302130	16303130
Chr1	16333030	16334030
Chr1	16333253	16334253
Chr1	16338381	16339381
Chr1	16338840	16339840
Chr1	16339413	16340413
Chr1	16343727	16344727
Chr1	16345115	16346115
Chr1	16352462	16353462
Chr1	16352981	16353981
Chr1	16354865	16355865
Chr1	16358956	16359956
Chr1	16374318	16375318
Chr1	16374825	16375825
Chr1	16376472	16377472
Chr1	16376630	16377630
Chr1	16381950	16382950
Chr1	16382270	16383270
Chr1	16393291	16394291
Chr1	16398867	16399867
Chr1	16399168	16400168
Chr1	16408596	16409596
Chr1	16439135	16440135
Chr1	16441836	16442836
Chr1	16442140	16443140
Chr1	16442613	16443613
Chr1	16446573	16447573
Chr1	16448523	16449523
Chr1	16467958	16468958
Chr1	16471271	16472271
Chr1	16471759	16472759
Chr1	16472414	16473414
Chr1	16472996	16473996
Chr1	16477321	16478321
Chr1	16478620	16479620
Chr1	16479052	16480052
Chr1	16479299	16480299
Chr1	16480605	16481605
Chr1	16480820	16481820
Chr1	16481238	16482238
Chr1	16483044	16484044
Chr1	16488569	16489569
Chr1	16489035	16490035
Chr1	16489823	16490823
Chr1	16490456	16491456
Chr1	16491031	16492031
Chr1	16493267	16494267
Chr1	16493489	16494489
Chr1	16493911	16494911
Chr1	16494274	16495274
Chr1	16495065	16496065
Chr1	16500589	16501589
Chr1	16507948	16508948
Chr1	16508396	16509396
Chr1	16513863	16514863
Chr1	16532609	16533609
Chr1	16533072	16534072
Chr1	16533615	16534615
Chr1	16533983	16534983
Chr1	16538703	16539703
Chr1	16542176	16543176
Chr1	16543426	16544426
Chr1	16543851	16544851
Chr1	16552537	16553537
Chr1	16552989	16553989
Chr1	16562574	16563574
Chr1	16563001	16564001
Chr1	16563224	16564224
Chr1	16563409	16564409
Chr1	16570565	16571565
Chr1	16596870	16597870
Chr1	16597073	16598073
Chr1	16615527	16616527
Chr1	16678194	16679194
Chr1	16678663	16679663
Chr1	16693494	16694494
Chr1	16702977	16703977
Chr1	16711845	16712845
Chr1	16719759	16720759
Chr1	16735181	16736181
Chr1	16766288	16767288
Chr1	16766635	16767635
Chr1	16767094	16768094
Chr1	16817321	16818321
Chr1	16817488	16818488
Chr1	16819699	16820699
Chr1	16825203	16826203
Chr1	16825743	16826743
Chr1	16832514	16833514
Chr1	16839178	16840178
Chr1	16839551	16840551
Chr1	16839678	16840678
Chr1	16839800	16840800
Chr1	16840034	16841034
Chr1	16840581	16841581
Chr1	16844453	16845453
Chr1	16846655	16847655
Chr1	16847028	16848028
Chr1	16857802	16858802
Chr1	16858005	16859005
Chr1	16858249	16859249
Chr1	16858576	16859576
Chr1	16858851	16859851
Chr1	16861672	16862672
Chr1	16862085	16863085
Chr1	16862945	16863945
Chr1	16866919	16867919
Chr1	16891795	16892795
Chr1	16893347	16894347
Chr1	16917964	16918964
Chr1	16918265	16919265
Chr1	16918780	16919780
Chr1	16921211	16922211
Chr1	16939610	16940610
Chr1	16943126	16944126
Chr1	16943266	16944266
Chr1	16943918	16944918
Chr1	16944280	16945280
Chr1	16944913	16945913
Chr1	16945879	16946879
Chr1	16946055	16947055
Chr1	16946751	16947751
Chr1	16947218	16948218
Chr1	16947661	16948661
Chr1	16947849	16948849
Chr1	16951800	16952800
Chr1	16952526	16953526
Chr1	16952679	16953679
Chr1	16956455	16957455
Chr1	16956912	16957912
Chr1	16957111	16958111
Chr1	16957611	16958611
Chr1	16971287	16972287
Chr1	16971432	16972432
Chr1	16973411	16974411
Chr1	16973557	16974557
Chr1	16973757	16974757
Chr1	16973993	16974993
Chr1	16974379	16975379
Chr1	17004244	17005244
Chr1	17017430	17018430
Chr1	17017922	17018922
Chr1	17018598	17019598
Chr1	17020147	17021147
Chr1	17020425	17021425
Chr1	17026523	17027523
Chr1	17027399	17028399
Chr1	17028050	17029050
Chr1	17033524	17034524
Chr1	17034204	17035204
Chr1	17038815	17039815
Chr1	17041608	17042608
Chr1	17042122	17043122
Chr1	17051625	17052625
Chr1	17051916	17052916
Chr1	17053966	17054966
Chr1	17054450	17055450
Chr1	17098845	17099845
Chr1	17122945	17123945
Chr1	17123283	17124283
Chr1	17185405	17186405
Chr1	17187941	17188941
Chr1	17198824	17199824
Chr1	17200940	17201940
Chr1	17201143	17202143
Chr1	17201352	17202352
Chr1	17201584	17202584
Chr1	17214840	17215840
Chr1	17215606	17216606
Chr1	17221760	17222760
Chr1	17222216	17223216
Chr1	17222568	17223568
Chr1	17230353	17231353
Chr1	17230941	17231941
Chr1	17231921	17232921
Chr1	17234592	17235592
Chr1	17236004	17237004
Chr1	17239976	17240976
Chr1	17240507	17241507
Chr1	17245660	17246660
Chr1	17247828	17248828
Chr1	17252790	17253790
Chr1	17256311	17257311
Chr1	17264878	17265878
Chr1	17265118	17266118
Chr1	17265324	17266324
Chr1	17265575	17266575
Chr1	17268606	17269606
Chr1	17277852	17278852
Chr1	17298030	17299030
Chr1	17298720	17299720
Chr1	17304955	17305955
Chr1	17305655	17306655
Chr1	17306183	17307183
Chr1	17310918	17311918
Chr1	17312686	17313686
Chr1	17312827	17313827
Chr1	17313154	17314154
Chr1	17331180	17332180
Chr1	17333298	17334298
Chr1	17337235	17338235
Chr1	17337636	17338636
Chr1	17338056	17339056
Chr1	17338562	17339562
Chr1	17339261	17340261
Chr1	17341330	17342330
Chr1	17341622	17342622
Chr1	17342214	17343214
Chr1	17342495	17343495
Chr1	17372258	17373258
Chr1	17380088	17381088
Chr1	17386269	17387269
Chr1	17386474	17387474
Chr1	17388359	17389359
Chr1	17388901	17389901
Chr1	17401654	17402654
Chr1	17445677	17446677
Chr1	17447180	17448180
Chr1	17447652	17448652
Chr1	17451981	17452981
Chr1	17456486	17457486
Chr1	17456612	17457612
Chr1	17493269	17494269
Chr1	17516104	17517104
Chr1	17539013	17540013
Chr1	17562936	17563936
Chr1	17563349	17564349
Chr1	17567174	17568174
Chr1	17567293	17568293
Chr1	17591413	17592413
Chr1	17600335	17601335
Chr1	17602823	17603823
Chr1	17635696	17636696
Chr1	17641977	17642977
Chr1	17676158	17677158
Chr1	17685376	17686376
Chr1	17696798	17697798
Chr1	17699186	17700186
Chr1	17703516	17704516
Chr1	17727168	17728168
Chr1	17730358	17731358
Chr1	17731103	17732103
Chr1	17732243	17733243
Chr1	17732530	17733530
Chr1	17734479	17735479
Chr1	17735071	17736071
Chr1	17741367	17742367
Chr1	17743386	17744386
Chr1	17746078	17747078
Chr1	17746316	17747316
Chr1	17752188	17753188
Chr1	17752636	17753636
Chr1	17753907	17754907
Chr1	17755081	17756081
Chr1	17755366	17756366
Chr1	17760231	17761231
Chr1	17762524	17763524
Chr1	17763476	17764476
Chr1	17763717	17764717
Chr1	17763992	17764992
Chr1	17764586	17765586
Chr1	17764836	17765836
Chr1	17765675	17766675
Chr1	17766045	17767045
Chr1	17767403	17768403
Chr1	17767596	17768596
Chr1	17767910	17768910
Chr1	17792569	17793569
Chr1	17795823	17796823
Chr1	17796331	17797331
Chr1	17803595	17804595
[truncated: 197,611 more rows]

## Sheet: silencers in T cell
Chromosome	start	end
Chr1	758320	759320
Chr1	825604	826604
Chr1	830071	831071
Chr1	904581	905581
Chr1	1000936	1001936
Chr1	1035218	1036218
Chr1	1089152	1090152
Chr1	1090266	1091266
Chr1	1130173	1131173
Chr1	1205166	1206166
Chr1	1314277	1315277
Chr1	1505278	1506278
Chr1	1512450	1513450
Chr1	1530226	1531226
Chr1	1664016	1665016
Chr1	1674260	1675260
Chr1	1740862	1741862
Chr1	1747313	1748313
Chr1	1757418	1758418
Chr1	1763944	1764944
Chr1	1765482	1766482
Chr1	1774424	1775424
Chr1	1777497	1778497
Chr1	1787361	1788361
Chr1	1790472	1791472
Chr1	1806704	1807704
Chr1	1807811	1808811
Chr1	1809318	1810318
Chr1	1809554	1810554
Chr1	1810924	1811924
Chr1	1817443	1818443
Chr1	1836095	1837095
Chr1	1836970	1837970
Chr1	2150155	2151155
Chr1	2155054	2156054
Chr1	2175694	2176694
Chr1	2208823	2209823
Chr1	2226767	2227767
Chr1	2513652	2514652
Chr1	2516055	2517055
Chr1	2539730	2540730
Chr1	2552853	2553853
Chr1	2580221	2581221
Chr1	2583349	2584349
Chr1	2583984	2584984
Chr1	2584789	2585789
Chr1	2585086	2586086
Chr1	2585213	2586213
Chr1	2586572	2587572
Chr1	2586894	2587894
Chr1	2607887	2608887
Chr1	2614339	2615339
Chr1	2615081	2616081
Chr1	2615730	2616730
Chr1	2615825	2616825
Chr1	2620851	2621851
Chr1	2621077	2622077
Chr1	2621342	2622342
Chr1	2621645	2622645
Chr1	2621901	2622901
Chr1	2622172	2623172
Chr1	2622360	2623360
Chr1	2622591	2623591
Chr1	2631180	2632180
Chr1	2631362	2632362
Chr1	2688337	2689337
Chr1	2688612	2689612
Chr1	2688799	2689799
Chr1	2692406	2693406
Chr1	3536013	3537013
Chr1	3814252	3815252
Chr1	4141008	4142008
Chr1	4311502	4312502
Chr1	4330913	4331913
Chr1	4959946	4960946
Chr1	4998971	4999971
Chr1	4999183	5000183
Chr1	5068848	5069848
Chr1	5218010	5219010
Chr1	5219827	5220827
Chr1	5371475	5372475
Chr1	5424381	5425381
Chr1	5428187	5429187
Chr1	5445187	5446187
Chr1	5446667	5447667
Chr1	5446767	5447767
Chr1	5446914	5447914
Chr1	5447192	5448192
Chr1	5484384	5485384
Chr1	5508044	5509044
Chr1	5508231	5509231
Chr1	5512929	5513929
Chr1	5517146	5518146
Chr1	5574496	5575496
Chr1	5574637	5575637
Chr1	5696933	5697933
Chr1	5700619	5701619
Chr1	5726116	5727116
Chr1	5729910	5730910
Chr1	5731698	5732698
Chr1	6092631	6093631
Chr1	6253115	6254115
Chr1	6254017	6255017
Chr1	6259930	6260930
Chr1	6261278	6262278
Chr1	6291988	6292988
Chr1	6299800	6300800
Chr1	6432630	6433630
Chr1	6455078	6456078
Chr1	6456308	6457308
Chr1	6470969	6471969
Chr1	6523404	6524404
Chr1	6605268	6606268
Chr1	6667508	6668508
Chr1	6762523	6763523
Chr1	6789016	6790016
Chr1	7394710	7395710
Chr1	7936936	7937936
Chr1	8008261	8009261
Chr1	8034791	8035791
Chr1	8051454	8052454
Chr1	8054309	8055309
Chr1	8093795	8094795
Chr1	8186894	8187894
Chr1	8205550	8206550
Chr1	8213267	8214267
Chr1	8227020	8228020
Chr1	8229055	8230055
Chr1	8297236	8298236
Chr1	8298701	8299701
Chr1	8367709	8368709
Chr1	8368860	8369860
Chr1	8369302	8370302
Chr1	8371814	8372814
Chr1	8380631	8381631
Chr1	8427670	8428670
Chr1	8462982	8463982
Chr1	8577749	8578749
Chr1	8582399	8583399
Chr1	8585507	8586507
Chr1	8644202	8645202
Chr1	8786217	8787217
Chr1	8891156	8892156
Chr1	8926918	8927918
Chr1	8933346	8934346
Chr1	8960052	8961052
Chr1	8963238	8964238
Chr1	8978512	8979512
Chr1	8978939	8979939
Chr1	8979495	8980495
Chr1	8987188	8988188
Chr1	9005523	9006523
Chr1	9022184	9023184
Chr1	9029166	9030166
Chr1	9029882	9030882
Chr1	9030111	9031111
Chr1	9039895	9040895
Chr1	9042247	9043247
Chr1	9045823	9046823
Chr1	9143887	9144887
Chr1	9176231	9177231
Chr1	9191361	9192361
Chr1	9192581	9193581
Chr1	9469607	9470607
Chr1	9471529	9472529
Chr1	9472140	9473140
Chr1	9484619	9485619
Chr1	9492655	9493655
Chr1	9516090	9517090
Chr1	9555711	9556711
Chr1	9584946	9585946
Chr1	9606271	9607271
Chr1	9608657	9609657
Chr1	9615189	9616189
Chr1	9647088	9648088
Chr1	9683880	9684880
Chr1	9685405	9686405
Chr1	9691899	9692899
Chr1	9699763	9700763
Chr1	9703155	9704155
Chr1	9731486	9732486
Chr1	9740335	9741335
Chr1	9745345	9746345
Chr1	9746065	9747065
Chr1	9772857	9773857
Chr1	9773813	9774813
Chr1	9838920	9839920
Chr1	9859576	9860576
Chr1	9859841	9860841
Chr1	9886330	9887330
Chr1	9972508	9973508
Chr1	10010836	10011836
Chr1	10030739	10031739
Chr1	10124924	10125924
Chr1	10134121	10135121
Chr1	10170455	10171455
Chr1	10190025	10191025
Chr1	10244963	10245963
Chr1	10264723	10265723
Chr1	10284854	10285854
Chr1	10387236	10388236
Chr1	10397804	10398804
Chr1	10437141	10438141
Chr1	10556814	10557814
Chr1	10557987	10558987
Chr1	10566866	10567866
Chr1	10573935	10574935
Chr1	10625730	10626730
Chr1	10633544	10634544
Chr1	10977142	10978142
Chr1	11025370	11026370
Chr1	11047777	11048777
Chr1	11073376	11074376
Chr1	11077420	11078420
Chr1	11079794	11080794
Chr1	11081721	11082721
Chr1	11184207	11185207
Chr1	11301429	11302429
Chr1	11301637	11302637
Chr1	11312844	11313844
Chr1	11315656	11316656
Chr1	11324208	11325208
Chr1	11329539	11330539
Chr1	11331397	11332397
Chr1	11352585	11353585
Chr1	11446222	11447222
Chr1	11533363	11534363
Chr1	11610456	11611456
Chr1	11660840	11661840
Chr1	11723036	11724036
Chr1	11771053	11772053
Chr1	11778418	11779418
Chr1	11781231	11782231
Chr1	11794876	11795876
Chr1	11841020	11842020
Chr1	11876805	11877805
Chr1	11970784	11971784
Chr1	12043343	12044343
Chr1	12059286	12060286
Chr1	12145552	12146552
Chr1	12146136	12147136
Chr1	12146489	12147489
Chr1	12150961	12151961
Chr1	12151127	12152127
Chr1	12172801	12173801
Chr1	12178894	12179894
Chr1	12180512	12181512
Chr1	12192052	12193052
Chr1	12192354	12193354
Chr1	12209021	12210021
Chr1	12230172	12231172
Chr1	12230879	12231879
Chr1	12250180	12251180
Chr1	12260562	12261562
Chr1	12287902	12288902
Chr1	12310955	12311955
Chr1	12335148	12336148
Chr1	12335995	12336995
Chr1	12401383	12402383
Chr1	12451621	12452621
Chr1	12493290	12494290
Chr1	12495935	12496935
Chr1	12515666	12516666
Chr1	12516453	12517453
Chr1	12537769	12538769
Chr1	12573469	12574469
Chr1	12684124	12685124
Chr1	12778548	12779548
Chr1	12843620	12844620
Chr1	13849836	13850836
Chr1	13989216	13990216
Chr1	13992261	13993261
Chr1	13992757	13993757
Chr1	14000317	14001317
Chr1	14056180	14057180
Chr1	14067189	14068189
Chr1	14104551	14105551
Chr1	14105797	14106797
Chr1	14105977	14106977
Chr1	14176710	14177710
Chr1	14691355	14692355
Chr1	15241560	15242560
Chr1	15426534	15427534
Chr1	15436381	15437381
Chr1	15563481	15564481
Chr1	15666154	15667154
Chr1	15666564	15667564
Chr1	15679309	15680309
Chr1	15680615	15681615
Chr1	15690965	15691965
Chr1	15732887	15733887
Chr1	15733229	15734229
Chr1	15733804	15734804
Chr1	15759374	15760374
Chr1	15759611	15760611
Chr1	15759864	15760864
Chr1	15760422	15761422
Chr1	15761071	15762071
Chr1	15761282	15762282
Chr1	15761535	15762535
Chr1	15762267	15763267
Chr1	15845540	15846540
Chr1	15848765	15849765
Chr1	15849383	15850383
Chr1	15921296	15922296
Chr1	15978457	15979457
Chr1	16000862	16001862
Chr1	16037035	16038035
Chr1	16129535	16130535
Chr1	16146667	16147667
Chr1	16150240	16151240
Chr1	16176225	16177225
Chr1	16180385	16181385
Chr1	16183845	16184845
Chr1	16184324	16185324
Chr1	16185215	16186215
Chr1	16215565	16216565
Chr1	16285239	16286239
Chr1	16299473	16300473
Chr1	16304203	16305203
Chr1	16315457	16316457
Chr1	16392522	16393522
Chr1	16392716	16393716
Chr1	16495714	16496714
Chr1	16519013	16520013
Chr1	16537064	16538064
Chr1	16539607	16540607
Chr1	16544993	16545993
Chr1	16565016	16566016
Chr1	16570508	16571508
Chr1	16596327	16597327
Chr1	16624473	16625473
Chr1	16698758	16699758
Chr1	16717152	16718152
Chr1	16819707	16820707
Chr1	16835562	16836562
Chr1	16836914	16837914
Chr1	16838879	16839879
Chr1	16842209	16843209
Chr1	16857511	16858511
Chr1	16857637	16858637
Chr1	16869414	16870414
Chr1	16889305	16890305
Chr1	16889500	16890500
Chr1	16889981	16890981
Chr1	16891731	16892731
Chr1	16891885	16892885
Chr1	16893003	16894003
Chr1	16893144	16894144
Chr1	16893363	16894363
Chr1	16895092	16896092
Chr1	16900959	16901959
Chr1	16901945	16902945
Chr1	16902343	16903343
Chr1	16904137	16905137
Chr1	16906657	16907657
Chr1	16907581	16908581
Chr1	16913699	16914699
Chr1	16920626	16921626
Chr1	16925198	16926198
Chr1	16933436	16934436
Chr1	16933602	16934602
Chr1	16934425	16935425
Chr1	16936434	16937434
Chr1	16937018	16938018
Chr1	16937281	16938281
Chr1	16937815	16938815
Chr1	16941406	16942406
Chr1	16942768	16943768
Chr1	16955498	16956498
Chr1	16959983	16960983
Chr1	16960487	16961487
Chr1	16961385	16962385
Chr1	16961817	16962817
Chr1	16962424	16963424
Chr1	16962767	16963767
Chr1	16963394	16964394
Chr1	16966725	16967725
Chr1	17032393	17033393
Chr1	17035343	17036343
Chr1	17047105	17048105
Chr1	17124250	17125250
Chr1	17202369	17203369
Chr1	17218533	17219533
Chr1	17219328	17220328
Chr1	17220625	17221625
Chr1	17223299	17224299
Chr1	17223390	17224390
Chr1	17225677	17226677
Chr1	17227825	17228825
Chr1	17229656	17230656
Chr1	17237646	17238646
Chr1	17288710	17289710
Chr1	17382571	17383571
Chr1	17385800	17386800
Chr1	17450703	17451703
Chr1	17508109	17509109
Chr1	17529946	17530946
Chr1	17539546	17540546
Chr1	17562727	17563727
Chr1	17564001	17565001
Chr1	17676792	17677792
Chr1	17715770	17716770
Chr1	17871123	17872123
Chr1	18458406	18459406
Chr1	18625890	18626890
Chr1	18937433	18938433
Chr1	18961800	18962800
Chr1	19261509	19262509
Chr1	19279058	19280058
Chr1	19279889	19280889
Chr1	19280460	19281460
Chr1	19280695	19281695
Chr1	19287966	19288966
Chr1	19298441	19299441
Chr1	19298726	19299726
Chr1	19373129	19374129
Chr1	19413945	19414945
Chr1	19414056	19415056
Chr1	19439820	19440820
Chr1	19502505	19503505
Chr1	19635127	19636127
Chr1	19639676	19640676
Chr1	19702085	19703085
Chr1	19707924	19708924
Chr1	19776307	19777307
Chr1	19781760	19782760
Chr1	19787578	19788578
Chr1	19787861	19788861
Chr1	19792942	19793942
Chr1	19796628	19797628
Chr1	19797485	19798485
Chr1	19798492	19799492
Chr1	19798656	19799656
Chr1	19839110	19840110
Chr1	19885940	19886940
Chr1	19905276	19906276
Chr1	19908129	19909129
Chr1	19911706	19912706
Chr1	19927126	19928126
Chr1	19932228	19933228
Chr1	19964455	19965455
Chr1	19986966	19987966
Chr1	20123132	20124132
Chr1	20123305	20124305
Chr1	20124373	20125373
Chr1	20124708	20125708
Chr1	20124853	20125853
Chr1	20300964	20301964
Chr1	20390021	20391021
Chr1	20542813	20543813
Chr1	20562152	20563152
Chr1	20576500	20577500
Chr1	20649321	20650321
Chr1	20685547	20686547
Chr1	20766942	20767942
Chr1	20814429	20815429
Chr1	20822410	20823410
Chr1	20958559	20959559
Chr1	20985861	20986861
Chr1	21004641	21005641
Chr1	21109910	21110910
Chr1	21140466	21141466
Chr1	21539454	21540454
Chr1	21563275	21564275
Chr1	21621696	21622696
Chr1	21622139	21623139
Chr1	21626856	21627856
Chr1	21649411	21650411
Chr1	21689003	21690003
Chr1	21872249	21873249
Chr1	21986955	21987955
Chr1	22267767	22268767
Chr1	22284524	22285524
Chr1	22346943	22347943
Chr1	22362493	22363493
Chr1	22364892	22365892
Chr1	22364991	22365991
Chr1	22366525	22367525
Chr1	22368407	22369407
Chr1	22371252	22372252
Chr1	22374468	22375468
Chr1	22377000	22378000
Chr1	22380272	22381272
Chr1	22384314	22385314
Chr1	22399589	22400589
Chr1	22434209	22435209
Chr1	22435024	22436024
Chr1	22436654	22437654
Chr1	22470852	22471852
Chr1	22698957	22699957
Chr1	22797030	22798030
Chr1	23030662	23031662
Chr1	23215405	23216405
Chr1	23258451	23259451
Chr1	23436888	23437888
Chr1	23495768	23496768
Chr1	23496152	23497152
Chr1	23496279	23497279
Chr1	23496378	23497378
Chr1	23522634	23523634
Chr1	23531852	23532852
Chr1	23660325	23661325
Chr1	23718424	23719424
Chr1	23718633	23719633
Chr1	23812311	23813311
Chr1	23813209	23814209
Chr1	23814664	23815664
Chr1	23823759	23824759
Chr1	23828164	23829164
Chr1	23850147	23851147
Chr1	23858192	23859192
Chr1	23858315	23859315
Chr1	23858482	23859482
Chr1	23870012	23871012
Chr1	23871007	23872007
Chr1	23876493	23877493
Chr1	23878400	23879400
Chr1	23883000	23884000
Chr1	23919255	23920255
Chr1	23919673	23920673
Chr1	23925807	23926807
Chr1	23927986	23928986
Chr1	23929923	23930923
Chr1	23934233	23935233
Chr1	23934341	23935341
Chr1	23936139	23937139
Chr1	23936680	23937680
Chr1	23938325	23939325
Chr1	23938502	23939502
Chr1	23938640	23939640
Chr1	23942593	23943593
Chr1	23943414	23944414
Chr1	23949588	23950588
Chr1	23954106	23955106
Chr1	23955038	23956038
Chr1	23956691	23957691
Chr1	23959324	23960324
Chr1	23962608	23963608
Chr1	23974755	23975755
Chr1	23983878	23984878
Chr1	24092091	24093091
Chr1	24135883	24136883
Chr1	24137525	24138525
Chr1	24168106	24169106
Chr1	24213461	24214461
Chr1	24236296	24237296
Chr1	24241070	24242070
Chr1	24276208	24277208
Chr1	24277017	24278017
Chr1	24340072	24341072
Chr1	24345177	24346177
Chr1	24353921	24354921
Chr1	24354232	24355232
Chr1	24374555	24375555
Chr1	24441169	24442169
Chr1	24511541	24512541
Chr1	24519481	24520481
Chr1	24519638	24520638
Chr1	24524997	24525997
Chr1	24566833	24567833
Chr1	24646430	24647430
Chr1	24651500	24652500
Chr1	24717002	24718002
Chr1	24717210	24718210
Chr1	24771068	24772068
Chr1	24779730	24780730
Chr1	24789627	24790627
Chr1	24809245	24810245
Chr1	24813339	24814339
Chr1	24814142	24815142
Chr1	24814369	24815369
Chr1	24814606	24815606
Chr1	24826715	24827715
Chr1	24830029	24831029
Chr1	24830317	24831317
Chr1	24831427	24832427
Chr1	24847513	24848513
Chr1	24849868	24850868
Chr1	24855394	24856394
Chr1	24861978	24862978
Chr1	24888831	24889831
Chr1	24897400	24898400
Chr1	24905046	24906046
Chr1	24908327	24909327
Chr1	24910457	24911457
Chr1	24916998	24917998
Chr1	24920454	24921454
Chr1	24921848	24922848
Chr1	24922510	24923510
Chr1	24959871	24960871
Chr1	25031342	25032342
Chr1	25048845	25049845
Chr1	25057354	25058354
Chr1	25089712	25090712
Chr1	25158028	25159028
Chr1	25158145	25159145
Chr1	25175687	25176687
Chr1	25175800	25176800
Chr1	25175899	25176899
Chr1	25182802	25183802
Chr1	25185026	25186026
Chr1	25216786	25217786
Chr1	25220310	25221310
Chr1	25225273	25226273
Chr1	25267208	25268208
Chr1	25280345	25281345
Chr1	25280703	25281703
Chr1	25311395	25312395
Chr1	25312060	25313060
Chr1	25314426	25315426
Chr1	25330544	25331544
Chr1	25346141	25347141
Chr1	25356173	25357173
Chr1	25361818	25362818
Chr1	25362236	25363236
Chr1	25362803	25363803
Chr1	25364488	25365488
Chr1	25368077	25369077
Chr1	25422475	25423475
Chr1	25426895	25427895
Chr1	25427111	25428111
Chr1	25431327	25432327
Chr1	25432138	25433138
Chr1	25435370	25436370
Chr1	25443594	25444594
Chr1	25479478	25480478
Chr1	25530103	25531103
Chr1	25541990	25542990
Chr1	25543028	25544028
Chr1	25544184	25545184
Chr1	25546869	25547869
Chr1	25559612	25560612
Chr1	25566782	25567782
Chr1	25567582	25568582
Chr1	25588338	25589338
Chr1	25679745	25680745
Chr1	25680391	25681391
Chr1	25707290	25708290
Chr1	25729155	25730155
Chr1	25792735	25793735
Chr1	25804368	25805368
Chr1	25817926	25818926
Chr1	25819123	25820123
Chr1	25887996	25888996
Chr1	25891959	25892959
Chr1	25945209	25946209
Chr1	25945846	25946846
Chr1	25947125	25948125
Chr1	25948695	25949695
Chr1	25953654	25954654
Chr1	25954045	25955045
Chr1	25957483	25958483
Chr1	25957928	25958928
Chr1	25968238	25969238
Chr1	25974377	25975377
Chr1	25974976	25975976
Chr1	25983960	25984960
Chr1	25998508	25999508
Chr1	26000860	26001860
Chr1	26002756	26003756
Chr1	26003492	26004492
Chr1	26018746	26019746
Chr1	26030317	26031317
Chr1	26121119	26122119
Chr1	26124161	26125161
Chr1	26128403	26129403
Chr1	26130630	26131630
Chr1	26202815	26203815
Chr1	26216873	26217873
Chr1	26220616	26221616
Chr1	26221679	26222679
Chr1	26254226	26255226
Chr1	26297500	26298500
Chr1	26323034	26324034
Chr1	26325483	26326483
Chr1	26406524	26407524
Chr1	26432295	26433295
Chr1	26493956	26494956
Chr1	26495198	26496198
Chr1	26557882	26558882
Chr1	26619794	26620794
Chr1	26643195	26644195
Chr1	26650224	26651224
Chr1	26666112	26667112
Chr1	26668447	26669447
Chr1	26676347	26677347
Chr1	26690538	26691538
Chr1	26698544	26699544
Chr1	26698636	26699636
Chr1	26698902	26699902
Chr1	26709117	26710117
Chr1	26710726	26711726
Chr1	26712314	26713314
Chr1	26712852	26713852
Chr1	26721939	26722939
Chr1	26742371	26743371
Chr1	26795829	26796829
Chr1	26805160	26806160
Chr1	26818225	26819225
Chr1	26850968	26851968
Chr1	26852459	26853459
Chr1	26854840	26855840
Chr1	26864226	26865226
Chr1	26864400	26865400
Chr1	26870876	26871876
Chr1	26871004	26872004
Chr1	26909009	26910009
Chr1	26910274	26911274
Chr1	26943849	26944849
Chr1	26944375	26945375
Chr1	27003722	27004722
Chr1	27004084	27005084
Chr1	27073322	27074322
Chr1	27085214	27086214
Chr1	27099925	27100925
Chr1	27110616	27111616
Chr1	27151597	27152597
Chr1	27156094	27157094
Chr1	27157088	27158088
Chr1	27157299	27158299
Chr1	27161176	27162176
Chr1	27202133	27203133
Chr1	27205754	27206754
Chr1	27212110	27213110
Chr1	27217448	27218448
Chr1	27228028	27229028
Chr1	27230884	27231884
Chr1	27235418	27236418
Chr1	27243438	27244438
Chr1	27252065	27253065
Chr1	27340237	27341237
Chr1	27346543	27347543
Chr1	27442425	27443425
Chr1	27450377	27451377
Chr1	27468650	27469650
Chr1	27471378	27472378
Chr1	27474280	27475280
Chr1	27475824	27476824
Chr1	27479446	27480446
Chr1	27481919	27482919
Chr1	27496727	27497727
Chr1	27578867	27579867
Chr1	27612282	27613282
Chr1	27623493	27624493
Chr1	27653148	27654148
Chr1	27667373	27668373
Chr1	27744530	27745530
Chr1	27751254	27752254
Chr1	27821019	27822019
Chr1	27834428	27835428
Chr1	27931497	27932497
Chr1	27931661	27932661
Chr1	27931992	27932992
Chr1	27936185	27937185
Chr1	27937060	27938060
Chr1	27950641	27951641
Chr1	27951633	27952633
Chr1	27953346	27954346
Chr1	27963245	27964245
Chr1	27969430	27970430
Chr1	27984697	27985697
Chr1	28046337	28047337
Chr1	28189795	28190795
Chr1	28196070	28197070
Chr1	28200844	28201844
Chr1	28215352	28216352
Chr1	28215532	28216532
Chr1	28215986	28216986
Chr1	28226188	28227188
Chr1	28227236	28228236
Chr1	28227950	28228950
Chr1	28418883	28419883
Chr1	28437600	28438600
Chr1	28443660	28444660
Chr1	28484900	28485900
Chr1	28525242	28526242
Chr1	28557493	28558493
Chr1	28568839	28569839
Chr1	28571714	28572714
Chr1	28581599	28582599
Chr1	28687191	28688191
Chr1	28713507	28714507
Chr1	28724221	28725221
Chr1	28736188	28737188
Chr1	28833676	28834676
Chr1	28834640	28835640
Chr1	28839258	28840258
Chr1	28839659	28840659
Chr1	28840552	28841552
Chr1	28842691	28843691
Chr1	28872741	28873741
Chr1	28875329	28876329
Chr1	28903251	28904251
Chr1	28903511	28904511
Chr1	28960498	28961498
Chr1	28973589	28974589
Chr1	28985986	28986986
Chr1	28993620	28994620
Chr1	29024328	29025328
Chr1	29049398	29050398
Chr1	29077066	29078066
Chr1	29084252	29085252
Chr1	29092740	29093740
Chr1	29096682	29097682
Chr1	29111541	29112541
Chr1	29112741	29113741
Chr1	29136914	29137914
Chr1	29172460	29173460
Chr1	29173395	29174395
Chr1	29198976	29199976
Chr1	29211695	29212695
Chr1	29243139	29244139
Chr1	29256854	29257854
Chr1	29277530	29278530
Chr1	29299212	29300212
Chr1	29309799	29310799
Chr1	29420085	29421085
Chr1	29432330	29433330
Chr1	29441502	29442502
Chr1	29442024	29443024
Chr1	29442842	29443842
Chr1	29456511	29457511
Chr1	29481079	29482079
Chr1	29503571	29504571
Chr1	29503769	29504769
Chr1	29529567	29530567
Chr1	29571973	29572973
Chr1	29572514	29573514
Chr1	30209148	30210148
Chr1	30351098	30352098
Chr1	30664040	30665040
Chr1	30704786	30705786
Chr1	31187617	31188617
Chr1	31188503	31189503
Chr1	31200153	31201153
Chr1	31230991	31231991
Chr1	31231336	31232336
Chr1	31231663	31232663
Chr1	31235185	31236185
Chr1	31252890	31253890
Chr1	31263202	31264202
Chr1	31263379	31264379
Chr1	31270215	31271215
Chr1	31357430	31358430
Chr1	31395785	31396785
Chr1	31402216	31403216
Chr1	31403326	31404326
Chr1	31457545	31458545
Chr1	31491063	31492063
Chr1	31531001	31532001
Chr1	31539875	31540875
Chr1	31664386	31665386
Chr1	31702873	31703873
Chr1	31763510	31764510
Chr1	31767495	31768495
Chr1	31772821	31773821
Chr1	31866522	31867522
Chr1	31904470	31905470
Chr1	32029578	32030578
Chr1	32143588	32144588
Chr1	32189054	32190054
Chr1	32230298	32231298
Chr1	32251065	32252065
Chr1	32252604	32253604
Chr1	32293716	32294716
Chr1	32314169	32315169
Chr1	32319276	32320276
Chr1	32331586	32332586
Chr1	32331869	32332869
Chr1	32334935	32335935
Chr1	32337776	32338776
Chr1	32355053	32356053
Chr1	32369043	32370043
Chr1	32387876	32388876
Chr1	32393675	32394675
Chr1	32422968	32423968
Chr1	32424708	32425708
Chr1	32426463	32427463
Chr1	32428771	32429771
Chr1	32429492	32430492
Chr1	32443045	32444045
Chr1	32451158	32452158
Chr1	32474688	32475688
Chr1	32528497	32529497
Chr1	32535830	32536830
Chr1	32613328	32614328
Chr1	32662627	32663627
Chr1	32675017	32676017
Chr1	32679551	32680551
Chr1	32691410	32692410
Chr1	32717470	32718470
Chr1	32724976	32725976
Chr1	32725536	32726536
Chr1	32728777	32729777
Chr1	32728994	32729994
Chr1	32729210	32730210
Chr1	32736898	32737898
Chr1	32737019	32738019
Chr1	32737639	32738639
Chr1	32742451	32743451
Chr1	32786549	32787549
Chr1	32791262	32792262
Chr1	32794541	32795541
Chr1	32824493	32825493
Chr1	32828146	32829146
Chr1	32829960	32830960
Chr1	32839514	32840514
Chr1	32843004	32844004
Chr1	32861148	32862148
Chr1	32861612	32862612
Chr1	32967297	32968297
Chr1	32987043	32988043
Chr1	32998525	32999525
Chr1	33119085	33120085
Chr1	33179621	33180621
Chr1	33197000	33198000
Chr1	33216863	33217863
Chr1	33263471	33264471
Chr1	33263599	33264599
Chr1	33416620	33417620
Chr1	33423153	33424153
Chr1	33423253	33424253
Chr1	33436056	33437056
Chr1	33442651	33443651
Chr1	33450163	33451163
Chr1	33454522	33455522
Chr1	33472478	33473478
Chr1	33522435	33523435
Chr1	33535892	33536892
Chr1	33540989	33541989
Chr1	33549388	33550388
Chr1	33552970	33553970
Chr1	33553650	33554650
Chr1	33590232	33591232
Chr1	33590422	33591422
Chr1	33615521	33616521
Chr1	33615707	33616707
Chr1	33623470	33624470
Chr1	33648629	33649629
Chr1	33702865	33703865
Chr1	33703618	33704618
Chr1	33926702	33927702
Chr1	34358349	34359349
Chr1	34374301	34375301
Chr1	34549177	34550177
Chr1	34909957	34910957
Chr1	35146782	35147782
Chr1	35317012	35318012
Chr1	35318034	35319034
Chr1	35433573	35434573
Chr1	35433683	35434683
Chr1	35434191	35435191
Chr1	35438463	35439463
Chr1	35451090	35452090
Chr1	35587907	35588907
Chr1	35635844	35636844
Chr1	35637052	35638052
Chr1	35637684	35638684
Chr1	35653930	35654930
Chr1	35655119	35656119
Chr1	35683623	35684623
Chr1	35909070	35910070
Chr1	35916324	35917324
Chr1	36175004	36176004
Chr1	36175423	36176423
Chr1	36207146	36208146
Chr1	36238349	36239349
Chr1	36272226	36273226
Chr1	36352244	36353244
Chr1	36398575	36399575
Chr1	36575500	36576500
Chr1	36594221	36595221
Chr1	36624611	36625611
Chr1	36625102	36626102
Chr1	36632219	36633219
Chr1	36652502	36653502
Chr1	36654024	36655024
Chr1	36658522	36659522
Chr1	36661177	36662177
Chr1	36676399	36677399
Chr1	36679514	36680514
Chr1	36685865	36686865
Chr1	36694646	36695646
Chr1	36742652	36743652
Chr1	36743630	36744630
Chr1	36757949	36758949
Chr1	36783495	36784495
Chr1	36833049	36834049
Chr1	36833779	36834779
Chr1	36839841	36840841
Chr1	36872195	36873195
Chr1	36913839	36914839
Chr1	36921996	36922996
Chr1	36926998	36927998
Chr1	37074553	37075553
Chr1	37907881	37908881
Chr1	37934585	37935585
Chr1	37938021	37939021
Chr1	37938731	37939731
Chr1	37984301	37985301
Chr1	37984825	37985825
Chr1	37997225	37998225
Chr1	38011104	38012104
Chr1	38025790	38026790
Chr1	38047187	38048187
Chr1	38068646	38069646
Chr1	38151859	38152859
Chr1	38250349	38251349
Chr1	38272346	38273346
Chr1	38276413	38277413
Chr1	38292230	38293230
Chr1	38326053	38327053
Chr1	38382872	38383872
Chr1	38384658	38385658
Chr1	38401347	38402347
Chr1	38515192	38516192
Chr1	39030210	39031210
Chr1	39061724	39062724
Chr1	39348642	39349642
Chr1	39357108	39358108
Chr1	39442385	39443385
Chr1	39452587	39453587
Chr1	39494850	39495850
Chr1	39504990	39505990
Chr1	39510086	39511086
Chr1	39544132	39545132
Chr1	39555575	39556575
Chr1	39659324	39660324
Chr1	39659459	39660459
Chr1	39659738	39660738
Chr1	39668838	39669838
Chr1	39698666	39699666
Chr1	39710273	39711273
Chr1	39724241	39725241
Chr1	39876219	39877219
Chr1	39967530	39968530
Chr1	40002172	40003172
Chr1	40004012	40005012
Chr1	40005998	40006998
Chr1	40008987	40009987
Chr1	40023951	40024951
Chr1	40043397	40044397
Chr1	40044083	40045083
Chr1	40044277	40045277
Chr1	40072078	40073078
Chr1	40143800	40144800
Chr1	40155014	40156014
Chr1	40155245	40156245
Chr1	40160377	40161377
Chr1	40167217	40168217
Chr1	40200967	40201967
Chr1	40351117	40352117
Chr1	40354695	40355695
Chr1	40424049	40425049
Chr1	40461455	40462455
Chr1	40495802	40496802
Chr1	40498241	40499241
Chr1	40501980	40502980
Chr1	40507560	40508560
Chr1	40520447	40521447
Chr1	40524159	40525159
Chr1	40540089	40541089
Chr1	40549448	40550448
Chr1	40564039	40565039
Chr1	40593341	40594341
Chr1	40619473	40620473
Chr1	40634326	40635326
Chr1	40717780	40718780
Chr1	40786871	40787871
Chr1	40808089	40809089
Chr1	40809436	40810436
Chr1	40809536	40810536
Chr1	40809957	40810957
Chr1	40844688	40845688
Chr1	40845346	40846346
Chr1	40848428	40849428
Chr1	40853384	40854384
Chr1	40854110	40855110
Chr1	40869393	40870393
Chr1	40888730	40889730
Chr1	40888896	40889896
Chr1	40890041	40891041
Chr1	40890777	40891777
Chr1	40895758	40896758
Chr1	41055432	41056432
Chr1	41099804	41100804
Chr1	41100585	41101585
Chr1	41102788	41103788
Chr1	41123899	41124899
Chr1	41134094	41135094
Chr1	41148358	41149358
Chr1	41199416	41200416
Chr1	41239524	41240524
Chr1	41313069	41314069
Chr1	41315766	41316766
Chr1	41416097	41417097
Chr1	41733446	41734446
Chr1	41778994	41779994
Chr1	41824073	41825073
Chr1	42130846	42131846
Chr1	42132582	42133582
Chr1	42144964	42145964
Chr1	42213756	42214756
Chr1	42268801	42269801
Chr1	42268987	42269987
Chr1	42269123	42270123
Chr1	42269546	42270546
Chr1	42275825	42276825
Chr1	42277382	42278382
Chr1	42277547	42278547
Chr1	42353997	42354997
Chr1	42354229	42355229
Chr1	42355798	42356798
Chr1	42356219	42357219
Chr1	42362580	42363580
Chr1	42362995	42363995
Chr1	42364170	42365170
Chr1	42367594	42368594
Chr1	42383973	42384973
Chr1	42384427	42385427
Chr1	42820937	42821937
Chr1	43174340	43175340
Chr1	43179809	43180809
Chr1	43196413	43197413
Chr1	43249317	43250317
Chr1	43263581	43264581
Chr1	43382192	43383192
Chr1	43397956	43398956
Chr1	43398061	43399061
Chr1	43407074	43408074
Chr1	43415379	43416379
Chr1	43502238	43503238
Chr1	43514087	43515087
Chr1	43570567	43571567
Chr1	43570662	43571662
Chr1	43692672	43693672
Chr1	43703457	43704457
Chr1	43741115	43742115
Chr1	43743453	43744453
Chr1	43796487	43797487
Chr1	43825509	43826509
Chr1	43879976	43880976
Chr1	43880222	43881222
Chr1	43998188	43999188
Chr1	44138185	44139185
Chr1	44301894	44302894
Chr1	44303595	44304595
Chr1	44407378	44408378
Chr1	44488332	44489332
Chr1	44502026	44503026
Chr1	44550364	44551364
Chr1	44663455	44664455
Chr1	44677866	44678866
Chr1	44843069	44844069
Chr1	44984697	44985697
Chr1	45074800	45075800
Chr1	45096145	45097145
Chr1	45096285	45097285
Chr1	45138510	45139510
Chr1	45146884	45147884
Chr1	45167367	45168367
Chr1	45185797	45186797
Chr1	45191525	45192525
Chr1	45202490	45203490
Chr1	45243471	45244471
Chr1	45243580	45244580
Chr1	45247597	45248597
Chr1	45262107	45263107
Chr1	45264017	45265017
Chr1	45264401	45265401
Chr1	45280608	45281608
Chr1	45280913	45281913
Chr1	45286434	45287434
Chr1	45301176	45302176
Chr1	45307068	45308068
Chr1	45329809	45330809
Chr1	45369361	45370361
Chr1	45413310	45414310
Chr1	45477327	45478327
Chr1	45479047	45480047
Chr1	45480186	45481186
Chr1	45484652	45485652
Chr1	45501314	45502314
Chr1	45544067	45545067
Chr1	45582918	45583918
Chr1	45628015	45629015
Chr1	45765422	45766422
Chr1	45791296	45792296
Chr1	45824907	45825907
Chr1	45888239	45889239
Chr1	45921943	45922943
Chr1	45954759	45955759
Chr1	45957290	45958290
Chr1	45963903	45964903
Chr1	45964308	45965308
Chr1	45970151	45971151
Chr1	46014942	46015942
Chr1	46053198	46054198
Chr1	46053771	46054771
Chr1	46054263	46055263
Chr1	46058182	46059182
Chr1	46105976	46106976
Chr1	46116549	46117549
Chr1	46118349	46119349
Chr1	46122306	46123306
Chr1	46127836	46128836
Chr1	46161760	46162760
Chr1	46164569	46165569
Chr1	46207405	46208405
Chr1	46238291	46239291
Chr1	46251503	46252503
Chr1	46255704	46256704
Chr1	46571172	46572172
Chr1	46614920	46615920
Chr1	46635996	46636996
Chr1	46690258	46691258
Chr1	46709433	46710433
Chr1	46714621	46715621
Chr1	46758748	46759748
Chr1	46812924	46813924
Chr1	46815061	46816061
Chr1	47000474	47001474
Chr1	47043298	47044298
Chr1	47067610	47068610
Chr1	47070849	47071849
Chr1	47071125	47072125
Chr1	47131397	47132397
Chr1	47201081	47202081
Chr1	47201491	47202491
Chr1	47640284	47641284
Chr1	47640492	47641492
Chr1	47640683	47641683
Chr1	47777156	47778156
Chr1	47854143	47855143
Chr1	47907584	47908584
Chr1	47908210	47909210
Chr1	47934870	47935870
Chr1	48323857	48324857
Chr1	48702021	48703021
Chr1	48702222	48703222
Chr1	48750062	48751062
Chr1	50794705	50795705
Chr1	51524124	51525124
Chr1	51678897	51679897
Chr1	51754715	51755715
Chr1	52081398	52082398
Chr1	52094521	52095521
Chr1	52330286	52331286
Chr1	52346878	52347878
Chr1	52354668	52355668
Chr1	52456723	52457723
Chr1	52586212	52587212
Chr1	52622418	52623418
Chr1	52771905	52772905
Chr1	52796391	52797391
Chr1	52829627	52830627
Chr1	52986752	52987752
Chr1	52994056	52995056
Chr1	53033413	53034413
Chr1	53065937	53066937
Chr1	53071364	53072364
Chr1	53095429	53096429
Chr1	53103386	53104386
Chr1	53104462	53105462
Chr1	53127268	53128268
Chr1	53186938	53187938
Chr1	53363023	53364023
Chr1	53382975	53383975
Chr1	53494650	53495650
Chr1	53658626	53659626
Chr1	53663599	53664599
Chr1	53687818	53688818
Chr1	53729863	53730863
Chr1	53744363	53745363
Chr1	53760615	53761615
Chr1	54052775	54053775
Chr1	54310255	54311255
Chr1	54355813	54356813
Chr1	54457585	54458585
Chr1	54687538	54688538
Chr1	54751007	54752007
Chr1	54760517	54761517
Chr1	54796910	54797910
Chr1	54814254	54815254
Chr1	54814781	54815781
Chr1	54851622	54852622
Chr1	54873983	54874983
Chr1	54874293	54875293
Chr1	54874941	54875941
Chr1	54878664	54879664
Chr1	54904146	54905146
Chr1	54934049	54935049
Chr1	54939474	54940474
Chr1	54945246	54946246
Chr1	54945813	54946813
Chr1	54947022	54948022
Chr1	54950536	54951536
Chr1	55011724	55012724
Chr1	55025351	55026351
Chr1	55233442	55234442
Chr1	55237903	55238903
Chr1	55264454	55265454
Chr1	55267190	55268190
Chr1	55267325	55268325
Chr1	55275867	55276867
Chr1	55292471	55293471
Chr1	55414479	55415479
Chr1	55742538	55743538
Chr1	57735992	57736992
Chr1	59087067	59088067
Chr1	59219613	59220613
Chr1	59219864	59220864
Chr1	59238691	59239691
Chr1	59282273	59283273
Chr1	59306836	59307836
Chr1	59350639	59351639
Chr1	59408077	59409077
Chr1	59433849	59434849
Chr1	59470689	59471689
Chr1	59481543	59482543
Chr1	59483790	59484790
Chr1	59763228	59764228
Chr1	59763426	59764426
Chr1	60224769	60225769
Chr1	60412679	60413679
Chr1	61444314	61445314
Chr1	62121849	62122849
Chr1	62200042	62201042
Chr1	62244711	62245711
Chr1	62649155	62650155
Chr1	62761279	62762279
Chr1	62800298	62801298
Chr1	62826641	62827641
Chr1	64080989	64081989
Chr1	64139773	64140773
Chr1	65317479	65318479
Chr1	65318478	65319478
Chr1	65327860	65328860
Chr1	65363462	65364462
Chr1	65432829	65433829
Chr1	65433077	65434077
Chr1	65541486	65542486
Chr1	65729826	65730826
Chr1	65741189	65742189
Chr1	66708013	66709013
Chr1	66712731	66713731
Chr1	66731269	66732269
Chr1	66740792	66741792
Chr1	66797571	66798571
Chr1	66799309	66800309
Chr1	66802378	66803378
Chr1	66808159	66809159
Chr1	66838918	66839918
Chr1	67614302	67615302
Chr1	67659412	67660412
Chr1	67671509	67672509
Chr1	67733875	67734875
Chr1	67833047	67834047
Chr1	67897122	67898122
Chr1	67912686	67913686
Chr1	68026744	68027744
Chr1	68027218	68028218
Chr1	70756842	70757842
Chr1	70994099	70995099
Chr1	71031862	71032862
Chr1	74969513	74970513
Chr1	76489892	76490892
Chr1	77774137	77775137
Chr1	77878869	77879869
Chr1	77998129	77999129
Chr1	78149936	78150936
Chr1	78152933	78153933
Chr1	78221556	78222556
Chr1	78347779	78348779
Chr1	78442087	78443087
Chr1	78610438	78611438
Chr1	79073364	79074364
Chr1	79116647	79117647
Chr1	79138488	79139488
Chr1	84568769	84569769
Chr1	84623360	84624360
Chr1	84853106	84854106
Chr1	84908158	84909158
Chr1	84943684	84944684
Chr1	85046399	85047399
Chr1	85329521	85330521
Chr1	85411173	85412173
Chr1	85439998	85440998
Chr1	85464247	85465247
Chr1	85574781	85575781
Chr1	85677664	85678664
Chr1	85682649	85683649
Chr1	85745024	85746024
Chr1	86941320	86942320
Chr1	86963563	86964563
Chr1	87205190	87206190
Chr1	87239603	87240603
Chr1	87447503	87448503
Chr1	87916241	87917241
Chr1	88419110	88420110
Chr1	89271761	89272761
Chr1	89328335	89329335
Chr1	89336702	89337702
Chr1	89343731	89344731
Chr1	89499388	89500388
Chr1	89737921	89738921
Chr1	89738295	89739295
Chr1	89738687	89739687
Chr1	89739173	89740173
Chr1	89965219	89966219
Chr1	90081197	90082197
Chr1	90127344	90128344
Chr1	90206994	90207994
Chr1	90207799	90208799
Chr1	90222181	90223181
Chr1	90223231	90224231
Chr1	90245704	90246704
Chr1	90246910	90247910
Chr1	90248696	90249696
Chr1	90277480	90278480
Chr1	90310818	90311818
Chr1	91317487	91318487
Chr1	91352551	91353551
Chr1	91463201	91464201
Chr1	91852465	91853465
Chr1	92021961	92022961
Chr1	92022517	92023517
Chr1	92035054	92036054
Chr1	92300313	92301313
Chr1	92338420	92339420
Chr1	92435922	92436922
Chr1	92561477	92562477
Chr1	92775839	92776839
Chr1	92777771	92778771
Chr1	92822362	92823362
Chr1	92868246	92869246
Chr1	92958111	92959111
Chr1	92958814	92959814
Chr1	93027203	93028203
Chr1	93324972	93325972
Chr1	93422665	93423665
Chr1	93454329	93455329
Chr1	93456711	93457711
Chr1	93459716	93460716
Chr1	93508133	93509133
Chr1	93551088	93552088
Chr1	93912180	93913180
Chr1	94302442	94303442
Chr1	95425707	95426707
Chr1	95523794	95524794
Chr1	95534660	95535660
Chr1	97651643	97652643
Chr1	99405323	99406323
Chr1	99405418	99406418
Chr1	100150950	100151950
Chr1	100265773	100266773
Chr1	100502061	100503061
Chr1	100710607	100711607
Chr1	100828090	100829090
Chr1	100834671	100835671
Chr1	100863289	100864289
Chr1	100871755	100872755
Chr1	100913581	100914581
Chr1	100916351	100917351
Chr1	100928700	100929700
Chr1	100977025	100978025
Chr1	101003569	101004569
Chr1	101008760	101009760
Chr1	101178861	101179861
Chr1	101391932	101392932
Chr1	101406874	101407874
Chr1	101414815	101415815
Chr1	101723039	101724039
Chr1	101744848	101745848
Chr1	101746269	101747269
Chr1	101746552	101747552
Chr1	101753059	101754059
Chr1	101771884	101772884
Chr1	101776447	101777447
Chr1	101819787	101820787
Chr1	101823338	101824338
Chr1	101910538	101911538
Chr1	102032832	102033832
Chr1	106582201	106583201
Chr1	108329579	108330579
Chr1	108591837	108592837
Chr1	108667838	108668838
Chr1	109104056	109105056
Chr1	109189845	109190845
Chr1	109247458	109248458
Chr1	109286808	109287808
Chr1	109287026	109288026
Chr1	109498220	109499220
Chr1	109498461	109499461
Chr1	109539505	109540505
Chr1	109636575	109637575
Chr1	109644391	109645391
Chr1	109644690	109645690
Chr1	109646821	109647821
Chr1	109668980	109669980
Chr1	109773802	109774802
Chr1	109959974	109960974
Chr1	110012020	110013020
Chr1	110012468	110013468
Chr1	110018565	110019565
Chr1	110023142	110024142
Chr1	110023324	110024324
Chr1	110023942	110024942
Chr1	110042692	110043692
Chr1	110042809	110043809
Chr1	110043169	110044169
Chr1	110043333	110044333
Chr1	110044113	110045113
Chr1	110080356	110081356
Chr1	110080944	110081944
Chr1	110178676	110179676
Chr1	110179553	110180553
Chr1	110182523	110183523
Chr1	110183488	110184488
Chr1	110246876	110247876
Chr1	110313413	110314413
Chr1	110317305	110318305
Chr1	110319831	110320831
Chr1	110319952	110320952
Chr1	110329320	110330320
Chr1	110332150	110333150
Chr1	110336986	110337986
Chr1	110339298	110340298
Chr1	110340254	110341254
Chr1	110342717	110343717
Chr1	110343931	110344931
Chr1	110345435	110346435
Chr1	110346084	110347084
Chr1	110347586	110348586
Chr1	110391208	110392208
Chr1	110442253	110443253
Chr1	110449041	110450041
Chr1	110567333	110568333
Chr1	110604545	110605545
Chr1	110679226	110680226
Chr1	110698233	110699233
Chr1	110738476	110739476
Chr1	110744801	110745801
Chr1	110746907	110747907
Chr1	110747207	110748207
Chr1	110750593	110751593
Chr1	110755867	110756867
Chr1	110877726	110878726
Chr1	110878045	110879045
Chr1	110878259	110879259
Chr1	110979369	110980369
Chr1	111003505	111004505
Chr1	111170882	111171882
Chr1	111174193	111175193
Chr1	111174427	111175427
Chr1	111174638	111175638
Chr1	111175764	111176764
Chr1	111176589	111177589
Chr1	111177003	111178003
Chr1	111177453	111178453
Chr1	111177739	111178739
Chr1	111179662	111180662
Chr1	111179851	111180851
Chr1	111180354	111181354
Chr1	111181055	111182055
Chr1	111228498	111229498
Chr1	111330200	111331200
Chr1	111413574	111414574
Chr1	111420156	111421156
Chr1	111440398	111441398
Chr1	111441486	111442486
Chr1	111442378	111443378
Chr1	111443078	111444078
Chr1	111445389	111446389
Chr1	111445545	111446545
Chr1	111446148	111447148
Chr1	111610343	111611343
Chr1	111734978	111735978
Chr1	111737048	111738048
Chr1	111738388	111739388
Chr1	111738651	111739651
Chr1	111738862	111739862
Chr1	111740633	111741633
Chr1	111755315	111756315
Chr1	111762468	111763468
Chr1	111769585	111770585
Chr1	111877478	111878478
Chr1	111877584	111878584
Chr1	111877792	111878792
Chr1	111911087	111912087
Chr1	111948656	111949656
Chr1	112024002	112025002
Chr1	112047960	112048960
Chr1	112048753	112049753
Chr1	112113025	112114025
Chr1	112145299	112146299
Chr1	112146282	112147282
Chr1	112222545	112223545
Chr1	112912008	112913008
Chr1	112931807	112932807
Chr1	112947856	112948856
Chr1	113180115	113181115
Chr1	113210177	113211177
Chr1	113274893	113275893
Chr1	113351440	113352440
Chr1	113351762	113352762
Chr1	113365501	113366501
Chr1	113373233	113374233
Chr1	113586115	113587115
Chr1	113599821	113600821
Chr1	113922295	113923295
Chr1	114260636	114261636
Chr1	114331574	114332574
Chr1	114349069	114350069
Chr1	114358470	114359470
Chr1	114413086	114414086
Chr1	114424875	114425875
Chr1	114575622	114576622
Chr1	114871186	114872186
Chr1	114883410	114884410
Chr1	114884852	114885852
Chr1	115121005	115122005
Chr1	115122115	115123115
Chr1	115122218	115123218
Chr1	115296125	115297125
Chr1	115594318	115595318
Chr1	115613609	115614609
Chr1	115628777	115629777
Chr1	116681926	116682926
Chr1	116692624	116693624
Chr1	116693244	116694244
Chr1	116764928	116765928
Chr1	116775400	116776400
Chr1	116810537	116811537
Chr1	116863948	116864948
Chr1	116864223	116865223
Chr1	116866764	116867764
Chr1	116888195	116889195
Chr1	116914091	116915091
Chr1	116942586	116943586
Chr1	116950226	116951226
Chr1	116963053	116964053
Chr1	117041298	117042298
Chr1	117045961	117046961
Chr1	117047480	117048480
Chr1	117051300	117052300
Chr1	117051642	117052642
Chr1	117079110	117080110
Chr1	117111210	117112210
Chr1	117138433	117139433
Chr1	117163342	117164342
Chr1	117274473	117275473
Chr1	117274726	117275726
Chr1	117297298	117298298
Chr1	117297466	117298466
Chr1	117299468	117300468
Chr1	117299626	117300626
Chr1	117301954	117302954
Chr1	117303933	117304933
Chr1	117304293	117305293
Chr1	117304393	117305393
Chr1	117308098	117309098
Chr1	117309568	117310568
Chr1	117309987	117310987
Chr1	117310886	117311886
Chr1	117341164	117342164
Chr1	117344011	117345011
Chr1	117344425	117345425
Chr1	117345690	117346690
Chr1	117349036	117350036
Chr1	117349712	117350712
Chr1	117353003	117354003
Chr1	117369878	117370878
Chr1	117438711	117439711
Chr1	117594285	117595285
Chr1	117595659	117596659
Chr1	117662965	117663965
Chr1	117900357	117901357
Chr1	117900539	117901539
Chr1	117900673	117901673
Chr1	118092472	118093472
Chr1	118158451	118159451
Chr1	118176976	118177976
Chr1	118178104	118179104
Chr1	118179478	118180478
Chr1	118180961	118181961
Chr1	118191330	118192330
Chr1	118200549	118201549
Chr1	118202293	118203293
Chr1	118202910	118203910
Chr1	118203102	118204102
Chr1	118295994	118296994
Chr1	118296602	118297602
Chr1	118299980	118300980
Chr1	119787683	119788683
Chr1	120156083	120157083
Chr1	120156264	120157264
Chr1	120413211	120414211
Chr1	120490952	120491952
Chr1	120557414	120558414
Chr1	120612694	120613694
Chr1	120619231	120620231
Chr1	120647443	120648443
Chr1	121107283	121108283
Chr1	121123858	121124858
Chr1	121294632	121295632
Chr1	142637886	142638886
Chr1	142914534	142915534
Chr1	142949355	142950355
Chr1	143145793	143146793
Chr1	143163666	143164666
Chr1	143279884	143280884
Chr1	143670205	143671205
Chr1	144526576	144527576
Chr1	144527124	144528124
Chr1	144527302	144528302
Chr1	144529720	144530720
Chr1	144530682	144531682
Chr1	144532255	144533255
Chr1	144532347	144533347
Chr1	144534457	144535457
Chr1	144534951	144535951
Chr1	144539043	144540043
Chr1	144539405	144540405
Chr1	144539609	144540609
Chr1	144539907	144540907
Chr1	144572132	144573132
Chr1	144585621	144586621
Chr1	144588637	144589637
Chr1	144595681	144596681
Chr1	144619884	144620884
Chr1	144706817	144707817
Chr1	144708545	144709545
Chr1	144840312	144841312
Chr1	144856848	144857848
Chr1	144859388	144860388
Chr1	144885382	144886382
Chr1	144886370	144887370
Chr1	144887355	144888355
Chr1	144982140	144983140
Chr1	144992174	144993174
Chr1	144992277	144993277
Chr1	144995176	144996176
Chr1	145009840	145010840
Chr1	145038220	145039220
Chr1	145041973	145042973
Chr1	145044661	145045661
Chr1	145045012	145046012
Chr1	145056077	145057077
Chr1	145061768	145062768
Chr1	145062515	145063515
Chr1	145062724	145063724
Chr1	145110641	145111641
Chr1	145121840	145122840
Chr1	145129597	145130597
Chr1	145196871	145197871
Chr1	145199824	145200824
Chr1	145207681	145208681
Chr1	145229926	145230926
Chr1	145272845	145273845
Chr1	145273197	145274197
Chr1	145280985	145281985
Chr1	145291454	145292454
Chr1	145296221	145297221
Chr1	145380602	145381602
Chr1	145381022	145382022
Chr1	145382951	145383951
Chr1	145401188	145402188
Chr1	145420063	145421063
Chr1	145420507	145421507
Chr1	145424353	145425353
Chr1	145427945	145428945
Chr1	145435699	145436699
Chr1	145439930	145440930
Chr1	145440070	145441070
Chr1	145443027	145444027
Chr1	145443690	145444690
Chr1	145444208	145445208
Chr1	145444463	145445463
Chr1	145444805	145445805
Chr1	145444918	145445918
Chr1	145446926	145447926
Chr1	145459139	145460139
Chr1	145459912	145460912
Chr1	145468169	145469169
Chr1	145470707	145471707
Chr1	145470871	145471871
Chr1	145471282	145472282
Chr1	145483679	145484679
Chr1	145494600	145495600
Chr1	145510271	145511271
Chr1	145542387	145543387
Chr1	145542564	145543564
Chr1	145546641	145547641
Chr1	145568395	145569395
Chr1	145578280	145579280
Chr1	145578824	145579824
Chr1	145585183	145586183
Chr1	145585710	145586710
Chr1	145715160	145716160
Chr1	145738905	145739905
Chr1	146251101	146252101
Chr1	146506075	146507075
Chr1	146569670	146570670
Chr1	146966275	146967275
Chr1	147016573	147017573
Chr1	147098928	147099928
Chr1	147195739	147196739
Chr1	147271477	147272477
Chr1	147315111	147316111
Chr1	147730436	147731436
Chr1	147810014	147811014
Chr1	147817377	147818377
Chr1	147817497	147818497
Chr1	147817648	147818648
Chr1	147822324	147823324
Chr1	148008714	148009714
Chr1	148008965	148009965
Chr1	148531382	148532382
Chr1	148533789	148534789
Chr1	148535123	148536123
Chr1	148545223	148546223
Chr1	148551452	148552452
Chr1	148552076	148553076
Chr1	149203620	149204620
Chr1	149206243	149207243
Chr1	149206684	149207684
Chr1	149220098	149221098
Chr1	149226463	149227463
Chr1	149280582	149281582
Chr1	149291437	149292437
Chr1	149297358	149298358
Chr1	149308778	149309778
Chr1	149890219	149891219
Chr1	149895113	149896113
Chr1	150120698	150121698
Chr1	150132235	150133235
Chr1	150133531	150134531
Chr1	150133827	150134827
Chr1	150136162	150137162
Chr1	150140822	150141822
Chr1	150141082	150142082
Chr1	150142406	150143406
Chr1	150158293	150159293
Chr1	150183869	150184869
Chr1	150184307	150185307
Chr1	150193691	150194691
Chr1	150311231	150312231
Chr1	150330835	150331835
Chr1	150343093	150344093
Chr1	150360662	150361662
Chr1	150366494	150367494
Chr1	150409210	150410210
Chr1	150436504	150437504
Chr1	150457337	150458337
Chr1	150462671	150463671
Chr1	150463415	150464415
Chr1	150508423	150509423
Chr1	150512538	150513538
Chr1	150517579	150518579
Chr1	150517701	150518701
Chr1	150517900	150518900
Chr1	150538793	150539793
Chr1	150541366	150542366
Chr1	150541896	150542896
Chr1	150542090	150543090
Chr1	150542337	150543337
Chr1	150542600	150543600
Chr1	150545924	150546924
Chr1	150552609	150553609
Chr1	150553312	150554312
Chr1	150580355	150581355
Chr1	150581017	150582017
Chr1	150584256	150585256
Chr1	150594912	150595912
Chr1	150597918	150598918
Chr1	150603832	150604832
Chr1	150622963	150623963
Chr1	150736151	150737151
Chr1	150740154	150741154
Chr1	150797414	150798414
Chr1	150828084	150829084
Chr1	150846596	150847596
Chr1	150849903	150850903
Chr1	150851049	150852049
Chr1	150933172	150934172
Chr1	150964075	150965075
Chr1	150967218	150968218
Chr1	150967592	150968592
Chr1	150967880	150968880
Chr1	150977932	150978932
Chr1	150982549	150983549
Chr1	151016884	151017884
Chr1	151021581	151022581
Chr1	151032346	151033346
Chr1	151033013	151034013
Chr1	151033226	151034226
Chr1	151074498	151075498
Chr1	151127837	151128837
Chr1	151128375	151129375
Chr1	151128788	151129788
Chr1	151142869	151143869
Chr1	151150240	151151240
Chr1	151169126	151170126
Chr1	151190934	151191934
Chr1	151216540	151217540
Chr1	151223190	151224190
Chr1	151223476	151224476
Chr1	151225460	151226460
Chr1	151229659	151230659
Chr1	151230367	151231367
Chr1	151231789	151232789
Chr1	151235306	151236306
Chr1	151298241	151299241
Chr1	151307303	151308303
Chr1	151324149	151325149
Chr1	151422083	151423083
Chr1	151480609	151481609
Chr1	151484469	151485469
Chr1	151485072	151486072
Chr1	151662210	151663210
Chr1	151706980	151707980
Chr1	151707212	151708212
Chr1	151707429	151708429
Chr1	151822462	151823462
Chr1	151870185	151871185
Chr1	151901237	151902237
Chr1	151916993	151917993
Chr1	151940161	151941161
Chr1	151961647	151962647
Chr1	151973846	151974846
Chr1	151984684	151985684
Chr1	151984992	151985992
Chr1	151985771	151986771
Chr1	151996815	151997815
Chr1	152024145	152025145
Chr1	152061028	152062028
Chr1	152250043	152251043
Chr1	152430558	152431558
Chr1	152433677	152434677
Chr1	152657798	152658798
Chr1	152841981	152842981
Chr1	153250051	153251051
Chr1	153376851	153377851
Chr1	153468033	153469033
Chr1	153481862	153482862
Chr1	153482243	153483243
Chr1	153482997	153483997
Chr1	153483271	153484271
Chr1	153492201	153493201
Chr1	153506813	153507813
Chr1	153507038	153508038
Chr1	153507272	153508272
Chr1	153511855	153512855
Chr1	153539209	153540209
Chr1	153641883	153642883
Chr1	153649259	153650259
Chr1	153689982	153690982
Chr1	153704460	153705460
Chr1	153734523	153735523
Chr1	153736393	153737393
Chr1	153783482	153784482
Chr1	153787533	153788533
Chr1	153794343	153795343
Chr1	153822110	153823110
Chr1	153825242	153826242
Chr1	153928964	153929964
Chr1	153957465	153958465
Chr1	153965572	153966572
Chr1	153965675	153966675
Chr1	153968327	153969327
Chr1	154136298	154137298
Chr1	154151647	154152647
Chr1	154156715	154157715
Chr1	154188768	154189768
Chr1	154247739	154248739
Chr1	154248952	154249952
Chr1	154306394	154307394
Chr1	154308896	154309896
Chr1	154309154	154310154
Chr1	154309412	154310412
Chr1	154310219	154311219
Chr1	154321854	154322854
Chr1	154344037	154345037
Chr1	154357151	154358151
Chr1	154358845	154359845
Chr1	154363562	154364562
Chr1	154413067	154414067
Chr1	154414346	154415346
Chr1	154414529	154415529
Chr1	154432578	154433578
Chr1	154435266	154436266
Chr1	154435450	154436450
Chr1	154501499	154502499
Chr1	154518559	154519559
Chr1	154577146	154578146
Chr1	154585562	154586562
Chr1	154637133	154638133
[truncated: 217,972+ more rows]

## Sheet: enhancers in T cell
Chromosome	start	end
Chr1	10036	11036
Chr1	713141	714141
Chr1	713981	714981
Chr1	714108	715108
Chr1	752182	753182
Chr1	761590	762590
Chr1	761974	762974
Chr1	762079	763079
Chr1	762394	763394
Chr1	762617	763617
Chr1	777722	778722
Chr1	779275	780275
Chr1	790202	791202
Chr1	793034	794034
Chr1	793225	794225
Chr1	833369	834369
Chr1	833637	834637
Chr1	833800	834800
Chr1	893585	894585
Chr1	893772	894772
Chr1	894267	895267
Chr1	895237	896237
Chr1	895479	896479
Chr1	895894	896894
Chr1	901110	902110
Chr1	901553	902553
Chr1	901805	902805
Chr1	902058	903058
Chr1	948264	949264
Chr1	951140	952140
Chr1	954268	955268
Chr1	954647	955647
Chr1	994472	995472
Chr1	1003247	1004247
Chr1	1003965	1004965
Chr1	1043005	1044005
Chr1	1071999	1072999
Chr1	1072318	1073318
Chr1	1072768	1073768
Chr1	1072941	1073941
Chr1	1079232	1080232
Chr1	1079820	1080820
Chr1	1087091	1088091
Chr1	1087304	1088304
Chr1	1090453	1091453
Chr1	1092014	1093014
Chr1	1092701	1093701
Chr1	1107164	1108164
Chr1	1107267	1108267
Chr1	1107440	1108440
Chr1	1108695	1109695
Chr1	1109070	1110070
Chr1	1135825	1136825
Chr1	1136448	1137448
Chr1	1139683	1140683
Chr1	1139855	1140855
Chr1	1143966	1144966
Chr1	1144607	1145607
Chr1	1147622	1148622
Chr1	1147847	1148847
Chr1	1149006	1150006
Chr1	1149618	1150618
Chr1	1149877	1150877
Chr1	1151893	1152893
Chr1	1156813	1157813
Chr1	1160884	1161884
Chr1	1165761	1166761
Chr1	1165920	1166920
Chr1	1166317	1167317
Chr1	1167195	1168195
Chr1	1185031	1186031
Chr1	1197171	1198171
Chr1	1197443	1198443
Chr1	1207028	1208028
Chr1	1207500	1208500
Chr1	1207994	1208994
Chr1	1208195	1209195
Chr1	1208951	1209951
Chr1	1241029	1242029
Chr1	1243168	1244168
Chr1	1244057	1245057
Chr1	1244208	1245208
Chr1	1245511	1246511
Chr1	1245963	1246963
Chr1	1246523	1247523
Chr1	1258287	1259287
Chr1	1258660	1259660
Chr1	1259665	1260665
Chr1	1260251	1261251
Chr1	1279181	1280181
Chr1	1284513	1285513
Chr1	1294137	1295137
Chr1	1294309	1295309
Chr1	1294714	1295714
Chr1	1306576	1307576
Chr1	1307514	1308514
Chr1	1307960	1308960
Chr1	1309996	1310996
Chr1	1310809	1311809
Chr1	1310939	1311939
Chr1	1333123	1334123
Chr1	1334433	1335433
Chr1	1335826	1336826
Chr1	1337113	1338113
Chr1	1341030	1342030
Chr1	1342213	1343213
Chr1	1342825	1343825
Chr1	1343029	1344029
Chr1	1343592	1344592
Chr1	1405476	1406476
Chr1	1405749	1406749
Chr1	1405866	1406866
Chr1	1406122	1407122
Chr1	1406504	1407504
Chr1	1407117	1408117
Chr1	1407637	1408637
Chr1	1411404	1412404
Chr1	1411872	1412872
Chr1	1439707	1440707
Chr1	1439903	1440903
Chr1	1440146	1441146
Chr1	1440335	1441335
Chr1	1445790	1446790
Chr1	1445975	1446975
Chr1	1446189	1447189
Chr1	1447451	1448451
Chr1	1449306	1450306
Chr1	1449508	1450508
Chr1	1475551	1476551
Chr1	1476999	1477999
Chr1	1482338	1483338
Chr1	1482445	1483445
Chr1	1486131	1487131
Chr1	1494057	1495057
Chr1	1503026	1504026
Chr1	1505395	1506395
Chr1	1508255	1509255
Chr1	1508460	1509460
Chr1	1508665	1509665
Chr1	1508894	1509894
Chr1	1509183	1510183
Chr1	1509866	1510866
Chr1	1510954	1511954
Chr1	1511158	1512158
Chr1	1511319	1512319
Chr1	1541802	1542802
Chr1	1542084	1543084
Chr1	1542537	1543537
Chr1	1548383	1549383
Chr1	1549948	1550948
Chr1	1551061	1552061
Chr1	1552652	1553652
Chr1	1564646	1565646
Chr1	1565843	1566843
Chr1	1566025	1567025
Chr1	1566352	1567352
Chr1	1567275	1568275
Chr1	1589378	1590378
Chr1	1590038	1591038
Chr1	1590471	1591471
Chr1	1590781	1591781
Chr1	1608519	1609519
Chr1	1608986	1609986
Chr1	1609604	1610604
Chr1	1610027	1611027
Chr1	1610322	1611322
Chr1	1617906	1618906
Chr1	1623344	1624344
Chr1	1623473	1624473
Chr1	1623823	1624823
Chr1	1624121	1625121
Chr1	1624965	1625965
Chr1	1625173	1626173
Chr1	1625297	1626297
Chr1	1648398	1649398
Chr1	1650053	1651053
Chr1	1654712	1655712
Chr1	1655316	1656316
Chr1	1655760	1656760
Chr1	1656042	1657042
Chr1	1656270	1657270
Chr1	1659683	1660683
Chr1	1676626	1677626
Chr1	1676750	1677750
Chr1	1677097	1678097
Chr1	1677396	1678396
Chr1	1708049	1709049
Chr1	1708313	1709313
Chr1	1708722	1709722
Chr1	1709041	1710041
Chr1	1709176	1710176
Chr1	1709763	1710763
Chr1	1710333	1711333
Chr1	1710499	1711499
Chr1	1710687	1711687
Chr1	1711010	1712010
Chr1	1711357	1712357
Chr1	1711900	1712900
Chr1	1720348	1721348
Chr1	1722034	1723034
Chr1	1724213	1725213
Chr1	1724681	1725681
Chr1	1727585	1728585
Chr1	1733750	1734750
Chr1	1734042	1735042
Chr1	1735805	1736805
Chr1	1736417	1737417
Chr1	1745296	1746296
Chr1	1746402	1747402
Chr1	1749955	1750955
Chr1	1755079	1756079
Chr1	1755228	1756228
Chr1	1764961	1765961
Chr1	1772560	1773560
Chr1	1772879	1773879
Chr1	1773394	1774394
Chr1	1773777	1774777
Chr1	1775673	1776673
Chr1	1780001	1781001
Chr1	1783794	1784794
Chr1	1789458	1790458
Chr1	1789751	1790751
Chr1	1792156	1793156
Chr1	1792538	1793538
Chr1	1793862	1794862
Chr1	1794109	1795109
Chr1	1796580	1797580
Chr1	1800319	1801319
Chr1	1800561	1801561
Chr1	1802021	1803021
Chr1	1802857	1803857
Chr1	1806907	1807907
Chr1	1811898	1812898
Chr1	1814530	1815530
Chr1	1818279	1819279
Chr1	1818531	1819531
Chr1	1819160	1820160
Chr1	1820119	1821119
Chr1	1820439	1821439
Chr1	1820938	1821938
Chr1	1821237	1822237
Chr1	1821456	1822456
Chr1	1822343	1823343
Chr1	1823791	1824791
Chr1	1837279	1838279
Chr1	1839353	1840353
Chr1	1839904	1840904
Chr1	1840699	1841699
Chr1	1840895	1841895
Chr1	1841054	1842054
Chr1	1841702	1842702
Chr1	1848556	1849556
Chr1	1849180	1850180
Chr1	1850483	1851483
Chr1	1851524	1852524
Chr1	1851751	1852751
Chr1	1852175	1853175
Chr1	1980247	1981247
Chr1	1981157	1982157
Chr1	1981577	1982577
Chr1	1981719	1982719
Chr1	2052415	2053415
Chr1	2052606	2053606
Chr1	2052857	2053857
Chr1	2053022	2054022
Chr1	2058169	2059169
Chr1	2062566	2063566
Chr1	2063139	2064139
Chr1	2063793	2064793
Chr1	2065017	2066017
Chr1	2065351	2066351
Chr1	2065479	2066479
Chr1	2065697	2066697
Chr1	2066202	2067202
Chr1	2067101	2068101
Chr1	2077149	2078149
Chr1	2077594	2078594
Chr1	2079771	2080771
Chr1	2080293	2081293
Chr1	2080469	2081469
Chr1	2082409	2083409
Chr1	2084064	2085064
Chr1	2084513	2085513
Chr1	2120519	2121519
Chr1	2126046	2127046
Chr1	2127096	2128096
Chr1	2129008	2130008
Chr1	2133263	2134263
Chr1	2133480	2134480
Chr1	2136113	2137113
Chr1	2156309	2157309
Chr1	2157106	2158106
Chr1	2157309	2158309
Chr1	2157708	2158708
Chr1	2157826	2158826
Chr1	2158700	2159700
Chr1	2161448	2162448
Chr1	2163598	2164598
Chr1	2163939	2164939
Chr1	2164734	2165734
Chr1	2165077	2166077
Chr1	2168292	2169292
Chr1	2171268	2172268
Chr1	2171675	2172675
Chr1	2171902	2172902
Chr1	2172127	2173127
Chr1	2173025	2174025
Chr1	2173188	2174188
Chr1	2173828	2174828
Chr1	2173925	2174925
Chr1	2174746	2175746
Chr1	2177170	2178170
Chr1	2177490	2178490
Chr1	2182019	2183019
Chr1	2182995	2183995
Chr1	2184367	2185367
Chr1	2185399	2186399
Chr1	2186903	2187903
Chr1	2188076	2189076
Chr1	2189012	2190012
Chr1	2189364	2190364
Chr1	2190181	2191181
Chr1	2190599	2191599
Chr1	2190774	2191774
Chr1	2191090	2192090
Chr1	2191214	2192214
Chr1	2191373	2192373
Chr1	2192158	2193158
Chr1	2196320	2197320
Chr1	2200230	2201230
Chr1	2200649	2201649
Chr1	2201936	2202936
Chr1	2206280	2207280
Chr1	2211397	2212397
Chr1	2216475	2217475
Chr1	2217151	2218151
Chr1	2217374	2218374
Chr1	2219466	2220466
Chr1	2219637	2220637
Chr1	2219801	2220801
Chr1	2225469	2226469
Chr1	2226186	2227186
Chr1	2227356	2228356
Chr1	2227555	2228555
Chr1	2227677	2228677
Chr1	2227899	2228899
Chr1	2231807	2232807
Chr1	2235937	2236937
Chr1	2236704	2237704
Chr1	2238089	2239089
Chr1	2238771	2239771
Chr1	2238931	2239931
Chr1	2241091	2242091
Chr1	2242067	2243067
Chr1	2242200	2243200
Chr1	2242367	2243367
Chr1	2242606	2243606
Chr1	2243820	2244820
Chr1	2245156	2246156
Chr1	2245458	2246458
Chr1	2245722	2246722
Chr1	2246325	2247325
Chr1	2321571	2322571
Chr1	2322073	2323073
Chr1	2322616	2323616
Chr1	2323335	2324335
Chr1	2323750	2324750
Chr1	2324085	2325085
Chr1	2342762	2343762
Chr1	2343525	2344525
Chr1	2346267	2347267
Chr1	2346453	2347453
Chr1	2346694	2347694
Chr1	2346960	2347960
Chr1	2347543	2348543
Chr1	2348147	2349147
Chr1	2425060	2426060
Chr1	2425442	2426442
Chr1	2427346	2428346
Chr1	2431149	2432149
Chr1	2453792	2454792
Chr1	2454088	2455088
Chr1	2454520	2455520
Chr1	2454934	2455934
Chr1	2455380	2456380
Chr1	2457552	2458552
Chr1	2475195	2476195
Chr1	2475330	2476330
Chr1	2476581	2477581
Chr1	2479613	2480613
Chr1	2479896	2480896
Chr1	2480223	2481223
Chr1	2480395	2481395
Chr1	2480497	2481497
Chr1	2480742	2481742
Chr1	2480849	2481849
Chr1	2481559	2482559
Chr1	2508483	2509483
Chr1	2511701	2512701
Chr1	2512496	2513496
Chr1	2515262	2516262
Chr1	2515752	2516752
Chr1	2516183	2517183
Chr1	2516671	2517671
Chr1	2517175	2518175
Chr1	2517704	2518704
Chr1	2554185	2555185
Chr1	2554548	2555548
Chr1	2573888	2574888
Chr1	2756424	2757424
Chr1	2756849	2757849
Chr1	2949314	2950314
Chr1	2949814	2950814
Chr1	2950047	2951047
Chr1	3288532	3289532
Chr1	3446889	3447889
Chr1	3447177	3448177
Chr1	3447278	3448278
Chr1	3513586	3514586
Chr1	3513717	3514717
Chr1	3513856	3514856
Chr1	3513971	3514971
Chr1	3541085	3542085
Chr1	3541856	3542856
Chr1	3542007	3543007
Chr1	3565254	3566254
Chr1	3565365	3566365
Chr1	3565517	3566517
Chr1	3566223	3567223
Chr1	3636312	3637312
Chr1	3662369	3663369
Chr1	3663226	3664226
Chr1	3663528	3664528
Chr1	3687291	3688291
Chr1	3688899	3689899
Chr1	3703625	3704625
Chr1	3703953	3704953
Chr1	3712738	3713738
Chr1	3713216	3714216
Chr1	3772816	3773816
Chr1	3773407	3774407
Chr1	3775085	3776085
Chr1	3783745	3784745
Chr1	3784707	3785707
Chr1	3799482	3800482
Chr1	3799803	3800803
Chr1	3802494	3803494
Chr1	3802703	3803703
Chr1	3806223	3807223
Chr1	3806576	3807576
Chr1	3806742	3807742
Chr1	3806971	3807971
Chr1	3807307	3808307
Chr1	3807723	3808723
Chr1	3808854	3809854
Chr1	3814862	3815862
Chr1	3815263	3816263
Chr1	3815397	3816397
Chr1	3815627	3816627
Chr1	3818005	3819005
Chr1	3818843	3819843
Chr1	3819493	3820493
Chr1	3838386	3839386
Chr1	3838645	3839645
Chr1	4327203	4328203
Chr1	5388838	5389838
Chr1	5389074	5390074
Chr1	5448357	5449357
Chr1	5448851	5449851
Chr1	5482939	5483939
Chr1	5726673	5727673
Chr1	5726855	5727855
Chr1	5727899	5728899
Chr1	5728121	5729121
Chr1	6015477	6016477
Chr1	6034896	6035896
Chr1	6051174	6052174
Chr1	6052005	6053005
Chr1	6053358	6054358
Chr1	6053580	6054580
Chr1	6053817	6054817
Chr1	6054094	6055094
Chr1	6054398	6055398
Chr1	6054652	6055652
Chr1	6067141	6068141
Chr1	6072358	6073358
Chr1	6072514	6073514
Chr1	6086444	6087444
Chr1	6087487	6088487
Chr1	6088038	6089038
Chr1	6097232	6098232
Chr1	6112168	6113168
Chr1	6244023	6245023
Chr1	6256985	6257985
Chr1	6257323	6258323
Chr1	6257818	6258818
Chr1	6258210	6259210
Chr1	6258680	6259680
Chr1	6260531	6261531
Chr1	6264413	6265413
Chr1	6264607	6265607
Chr1	6265336	6266336
Chr1	6265728	6266728
Chr1	6294812	6295812
Chr1	6295116	6296116
Chr1	6295547	6296547
Chr1	6295978	6296978
Chr1	6353775	6354775
Chr1	6354491	6355491
Chr1	6354712	6355712
Chr1	6408111	6409111
Chr1	6408751	6409751
Chr1	6408979	6409979
Chr1	6417798	6418798
Chr1	6419411	6420411
Chr1	6419683	6420683
Chr1	6421199	6422199
Chr1	6424827	6425827
Chr1	6451684	6452684
Chr1	6451799	6452799
Chr1	6452098	6453098
Chr1	6453310	6454310
Chr1	6509421	6510421
Chr1	6516282	6517282
Chr1	6516554	6517554
Chr1	6516765	6517765
Chr1	6517092	6518092
Chr1	6518853	6519853
Chr1	6520024	6521024
Chr1	6523681	6524681
Chr1	6525744	6526744
Chr1	6550569	6551569
Chr1	6552986	6553986
Chr1	6555100	6556100
Chr1	6557211	6558211
Chr1	6583370	6584370
Chr1	6605067	6606067
Chr1	6605444	6606444
Chr1	6605656	6606656
Chr1	6605915	6606915
Chr1	6606065	6607065
Chr1	6613616	6614616
Chr1	6614223	6615223
Chr1	6637757	6638757
Chr1	6639385	6640385
Chr1	6641308	6642308
Chr1	6653701	6654701
Chr1	6658580	6659580
Chr1	6659392	6660392
Chr1	6660113	6661113
Chr1	6660227	6661227
Chr1	6660893	6661893
Chr1	6662815	6663815
Chr1	6663872	6664872
Chr1	6663974	6664974
Chr1	6672291	6673291
Chr1	6672953	6673953
Chr1	6673501	6674501
Chr1	6673651	6674651
Chr1	6674556	6675556
Chr1	6675273	6676273
Chr1	6676000	6677000
Chr1	6682186	6683186
Chr1	6683418	6684418
Chr1	6683788	6684788
Chr1	6684573	6685573
Chr1	6684994	6685994
Chr1	6685323	6686323
Chr1	6685457	6686457
Chr1	6716644	6717644
Chr1	6760891	6761891
Chr1	6761485	6762485
Chr1	6761935	6762935
Chr1	6843607	6844607
Chr1	6844578	6845578
Chr1	6845728	6846728
Chr1	6846139	6847139
Chr1	6847057	6848057
Chr1	6906491	6907491
Chr1	7278013	7279013
Chr1	7727425	7728425
Chr1	7740033	7741033
Chr1	7740246	7741246
Chr1	7765328	7766328
Chr1	7765632	7766632
Chr1	7765819	7766819
Chr1	7812537	7813537
Chr1	7830610	7831610
Chr1	7831224	7832224
Chr1	7832583	7833583
Chr1	7841741	7842741
Chr1	7842125	7843125
Chr1	7843463	7844463
Chr1	7844186	7845186
Chr1	7844373	7845373
Chr1	7844549	7845549
Chr1	7844741	7845741
Chr1	7844874	7845874
Chr1	7845091	7846091
Chr1	7845269	7846269
Chr1	7887330	7888330
Chr1	7959352	7960352
Chr1	7975605	7976605
Chr1	7986750	7987750
Chr1	7988600	7989600
Chr1	7989411	7990411
Chr1	7990728	7991728
Chr1	7991278	7992278
Chr1	8000543	8001543
Chr1	8000816	8001816
Chr1	8002570	8003570
Chr1	8002763	8003763
Chr1	8008785	8009785
Chr1	8009084	8010084
Chr1	8010256	8011256
Chr1	8011436	8012436
Chr1	8013189	8014189
Chr1	8013755	8014755
Chr1	8014454	8015454
Chr1	8015913	8016913
Chr1	8021347	8022347
Chr1	8022218	8023218
Chr1	8022438	8023438
Chr1	8034977	8035977
Chr1	8035190	8036190
Chr1	8036880	8037880
Chr1	8040878	8041878
Chr1	8041155	8042155
Chr1	8042121	8043121
Chr1	8063131	8064131
Chr1	8074776	8075776
Chr1	8085963	8086963
Chr1	8156062	8157062
Chr1	8172840	8173840
Chr1	8172986	8173986
Chr1	8180436	8181436
Chr1	8180643	8181643
Chr1	8205318	8206318
Chr1	8209279	8210279
Chr1	8211062	8212062
Chr1	8211639	8212639
Chr1	8212695	8213695
Chr1	8213472	8214472
Chr1	8226875	8227875
Chr1	8227840	8228840
Chr1	8229493	8230493
Chr1	8229868	8230868
Chr1	8230304	8231304
Chr1	8242044	8243044
Chr1	8243087	8244087
Chr1	8271800	8272800
Chr1	8278404	8279404
Chr1	8374029	8375029
Chr1	8377407	8378407
Chr1	8377739	8378739
Chr1	8378439	8379439
Chr1	8407765	8408765
Chr1	8413318	8414318
Chr1	8417264	8418264
Chr1	8428756	8429756
Chr1	8430279	8431279
Chr1	8434557	8435557
Chr1	8438241	8439241
Chr1	8442418	8443418
Chr1	8442656	8443656
Chr1	8442841	8443841
Chr1	8455277	8456277
Chr1	8456516	8457516
Chr1	8456808	8457808
Chr1	8456991	8457991
Chr1	8457230	8458230
Chr1	8462163	8463163
Chr1	8466860	8467860
Chr1	8467448	8468448
Chr1	8468819	8469819
Chr1	8471197	8472197
Chr1	8481892	8482892
Chr1	8482065	8483065
Chr1	8482440	8483440
Chr1	8483332	8484332
Chr1	8483589	8484589
Chr1	8484113	8485113
Chr1	8484951	8485951
Chr1	8486867	8487867
Chr1	8487234	8488234
Chr1	8487632	8488632
Chr1	8490505	8491505
Chr1	8490810	8491810
Chr1	8508858	8509858
Chr1	8509726	8510726
Chr1	8522837	8523837
Chr1	8532339	8533339
Chr1	8555759	8556759
Chr1	8556153	8557153
Chr1	8569582	8570582
Chr1	8569899	8570899
Chr1	8576688	8577688
Chr1	8576810	8577810
Chr1	8577242	8578242
Chr1	8577472	8578472
Chr1	8580100	8581100
Chr1	8580627	8581627
Chr1	8583122	8584122
Chr1	8583462	8584462
Chr1	8584429	8585429
Chr1	8584794	8585794
Chr1	8587058	8588058
Chr1	8592943	8593943
Chr1	8611884	8612884
Chr1	8662217	8663217
Chr1	8662938	8663938
Chr1	8663678	8664678
Chr1	8663872	8664872
Chr1	8664065	8665065
Chr1	8664287	8665287
Chr1	8664408	8665408
Chr1	8683421	8684421
Chr1	8689527	8690527
Chr1	8710693	8711693
Chr1	8721472	8722472
Chr1	8723800	8724800
Chr1	8729701	8730701
Chr1	8772112	8773112
Chr1	8772487	8773487
Chr1	8772738	8773738
Chr1	8876594	8877594
Chr1	8877342	8878342
Chr1	8878098	8879098
Chr1	8885661	8886661
Chr1	8889047	8890047
Chr1	8889312	8890312
Chr1	8889535	8890535
Chr1	8908966	8909966
Chr1	8918036	8919036
Chr1	8919146	8920146
Chr1	8931307	8932307
Chr1	8932684	8933684
Chr1	8933116	8934116
Chr1	8933622	8934622
Chr1	8933775	8934775
Chr1	8934584	8935584
Chr1	8934903	8935903
Chr1	8934988	8935988
Chr1	8935085	8936085
Chr1	8935305	8936305
Chr1	8935829	8936829
Chr1	8936028	8937028
Chr1	8936153	8937153
Chr1	8936431	8937431
Chr1	8936954	8937954
Chr1	8937090	8938090
Chr1	8938463	8939463
Chr1	8939771	8940771
Chr1	8941231	8942231
Chr1	8959669	8960669
Chr1	8959913	8960913
Chr1	8978289	8979289
Chr1	8980534	8981534
Chr1	8981389	8982389
Chr1	8986276	8987276
Chr1	8986551	8987551
Chr1	8986986	8987986
Chr1	8989669	8990669
Chr1	8997766	8998766
Chr1	9005915	9006915
Chr1	9006015	9007015
Chr1	9006219	9007219
Chr1	9006451	9007451
Chr1	9006837	9007837
Chr1	9016314	9017314
Chr1	9021929	9022929
Chr1	9022554	9023554
Chr1	9023004	9024004
Chr1	9026259	9027259
Chr1	9027281	9028281
Chr1	9027389	9028389
Chr1	9030941	9031941
Chr1	9046353	9047353
Chr1	9046504	9047504
Chr1	9046625	9047625
Chr1	9047450	9048450
Chr1	9047732	9048732
Chr1	9064024	9065024
Chr1	9181812	9182812
Chr1	9187780	9188780
Chr1	9189097	9190097
Chr1	9190571	9191571
Chr1	9294318	9295318
Chr1	9295253	9296253
Chr1	9299443	9300443
Chr1	9299678	9300678
Chr1	9299827	9300827
Chr1	9335026	9336026
Chr1	9335264	9336264
Chr1	9349415	9350415
Chr1	9349697	9350697
Chr1	9350077	9351077
Chr1	9350186	9351186
Chr1	9350346	9351346
Chr1	9354348	9355348
Chr1	9354755	9355755
Chr1	9375423	9376423
Chr1	9460091	9461091
Chr1	9470460	9471460
Chr1	9470729	9471729
Chr1	9472284	9473284
Chr1	9472407	9473407
Chr1	9472591	9473591
Chr1	9472825	9473825
Chr1	9473128	9474128
Chr1	9473294	9474294
Chr1	9477130	9478130
Chr1	9486067	9487067
Chr1	9488456	9489456
Chr1	9549949	9550949
Chr1	9550844	9551844
Chr1	9554596	9555596
Chr1	9555527	9556527
Chr1	9597479	9598479
Chr1	9597924	9598924
Chr1	9598129	9599129
Chr1	9598429	9599429
Chr1	9598890	9599890
Chr1	9599734	9600734
Chr1	9599832	9600832
Chr1	9599957	9600957
Chr1	9600091	9601091
Chr1	9600516	9601516
Chr1	9601947	9602947
Chr1	9602206	9603206
Chr1	9618350	9619350
Chr1	9619399	9620399
Chr1	9621044	9622044
Chr1	9621233	9622233
Chr1	9648179	9649179
Chr1	9649036	9650036
Chr1	9649889	9650889
Chr1	9685251	9686251
Chr1	9685798	9686798
Chr1	9686111	9687111
Chr1	9686305	9687305
Chr1	9687953	9688953
Chr1	9688293	9689293
Chr1	9688751	9689751
Chr1	9689381	9690381
Chr1	9689838	9690838
Chr1	9690350	9691350
Chr1	9692240	9693240
Chr1	9693335	9694335
Chr1	9698918	9699918
Chr1	9699035	9700035
Chr1	9703508	9704508
Chr1	9704256	9705256
Chr1	9711212	9712212
Chr1	9711980	9712980
Chr1	9712460	9713460
Chr1	9713031	9714031
Chr1	9713475	9714475
Chr1	9713839	9714839
Chr1	9714168	9715168
Chr1	9714519	9715519
Chr1	9714940	9715940
Chr1	9715616	9716616
Chr1	9716761	9717761
Chr1	9718003	9719003
Chr1	9724875	9725875
Chr1	9731277	9732277
Chr1	9735135	9736135
Chr1	9736542	9737542
Chr1	9738497	9739497
Chr1	9738946	9739946
Chr1	9741550	9742550
Chr1	9743118	9744118
Chr1	9746832	9747832
Chr1	9748028	9749028
Chr1	9748858	9749858
Chr1	9750138	9751138
Chr1	9750653	9751653
Chr1	9751168	9752168
Chr1	9751571	9752571
Chr1	9754138	9755138
Chr1	9761286	9762286
Chr1	9761841	9762841
Chr1	9761975	9762975
Chr1	9762665	9763665
Chr1	9764455	9765455
Chr1	9765275	9766275
Chr1	9765397	9766397
Chr1	9769920	9770920
Chr1	9771179	9772179
Chr1	9771375	9772375
Chr1	9777264	9778264
Chr1	9777699	9778699
Chr1	9778813	9779813
Chr1	9780769	9781769
Chr1	9780898	9781898
Chr1	9784019	9785019
Chr1	9786712	9787712
Chr1	9787154	9788154
Chr1	9788348	9789348
Chr1	9789037	9790037
Chr1	9789159	9790159
Chr1	9793628	9794628
Chr1	9827691	9828691
Chr1	9845170	9846170
Chr1	9846766	9847766
Chr1	9846884	9847884
Chr1	9847138	9848138
Chr1	9847425	9848425
Chr1	9864876	9865876
Chr1	9882506	9883506
Chr1	9882756	9883756
Chr1	9883879	9884879
Chr1	9884466	9885466
Chr1	9884606	9885606
Chr1	9885080	9886080
Chr1	9885650	9886650
Chr1	9885878	9886878
Chr1	9909840	9910840
Chr1	9941635	9942635
Chr1	9941964	9942964
Chr1	9942159	9943159
Chr1	9969238	9970238
Chr1	9969416	9970416
Chr1	9969568	9970568
Chr1	9970283	9971283
Chr1	9971852	9972852
Chr1	9972051	9973051
Chr1	9974154	9975154
Chr1	10001767	10002767
Chr1	10003948	10004948
Chr1	10010117	10011117
Chr1	10090275	10091275
Chr1	10090554	10091554
Chr1	10091255	10092255
Chr1	10092480	10093480
Chr1	10093313	10094313
Chr1	10094301	10095301
Chr1	10120675	10121675
Chr1	10228886	10229886
Chr1	10231802	10232802
Chr1	10242419	10243419
Chr1	10268877	10269877
Chr1	10269020	10270020
Chr1	10269392	10270392
Chr1	10270718	10271718
Chr1	10271199	10272199
Chr1	10271766	10272766
Chr1	10272114	10273114
Chr1	10272651	10273651
Chr1	10275820	10276820
Chr1	10292973	10293973
Chr1	10367695	10368695
Chr1	10367983	10368983
Chr1	10384400	10385400
Chr1	10384500	10385500
Chr1	10385250	10386250
Chr1	10457856	10458856
Chr1	10458493	10459493
Chr1	10459202	10460202
Chr1	10459365	10460365
Chr1	10488534	10489534
Chr1	10489015	10490015
Chr1	10490202	10491202
Chr1	10531536	10532536
Chr1	10532014	10533014
Chr1	10532473	10533473
Chr1	10533865	10534865
Chr1	10534401	10535401
Chr1	10535424	10536424
Chr1	10554695	10555695
Chr1	10555426	10556426
Chr1	10555762	10556762
Chr1	10556178	10557178
Chr1	10556934	10557934
Chr1	10566242	10567242
Chr1	10567236	10568236
Chr1	10567622	10568622
Chr1	10570056	10571056
Chr1	10570173	10571173
Chr1	10573223	10574223
Chr1	10574150	10575150
Chr1	10575350	10576350
Chr1	10575506	10576506
Chr1	10584478	10585478
Chr1	10584898	10585898
Chr1	10585176	10586176
Chr1	10585402	10586402
Chr1	10603968	10604968
Chr1	10752147	10753147
Chr1	10753443	10754443
Chr1	10754007	10755007
Chr1	10754528	10755528
Chr1	10754946	10755946
Chr1	10755462	10756462
Chr1	10963056	10964056
Chr1	10963459	10964459
Chr1	10964328	10965328
Chr1	10964641	10965641
Chr1	10964805	10965805
Chr1	10965758	10966758
Chr1	10976877	10977877
Chr1	10977566	10978566
Chr1	10977899	10978899
Chr1	10991902	10992902
Chr1	10999392	11000392
Chr1	10999777	11000777
Chr1	11000321	11001321
Chr1	11000517	11001517
Chr1	11001324	11002324
Chr1	11073085	11074085
Chr1	11074021	11075021
Chr1	11076417	11077417
Chr1	11078193	11079193
Chr1	11087979	11088979
Chr1	11118395	11119395
Chr1	11120026	11121026
Chr1	11121334	11122334
Chr1	11122516	11123516
Chr1	11122708	11123708
Chr1	11122895	11123895
Chr1	11158483	11159483
Chr1	11158818	11159818
Chr1	11159032	11160032
Chr1	11159527	11160527
Chr1	11160380	11161380
Chr1	11287238	11288238
Chr1	11305435	11306435
Chr1	11306084	11307084
Chr1	11306190	11307190
Chr1	11316688	11317688
Chr1	11321356	11322356
Chr1	11321696	11322696
Chr1	11321904	11322904
Chr1	11322266	11323266
Chr1	11332070	11333070
Chr1	11332861	11333861
Chr1	11333764	11334764
Chr1	11335919	11336919
Chr1	11340715	11341715
Chr1	11341571	11342571
Chr1	11342020	11343020
Chr1	11342979	11343979
Chr1	11351336	11352336
Chr1	11353565	11354565
Chr1	11355095	11356095
Chr1	11355629	11356629
Chr1	11395262	11396262
Chr1	11466957	11467957
Chr1	11467102	11468102
Chr1	11707409	11708409
Chr1	11707934	11708934
Chr1	11708598	11709598
Chr1	11708899	11709899
Chr1	11709731	11710731
Chr1	11713804	11714804
Chr1	11713930	11714930
Chr1	11714290	11715290
Chr1	11714644	11715644
Chr1	11715009	11716009
Chr1	11715666	11716666
Chr1	11723261	11724261
Chr1	11723746	11724746
Chr1	11724571	11725571
Chr1	11739927	11740927
Chr1	11740201	11741201
Chr1	11740336	11741336
Chr1	11752321	11753321
Chr1	11752461	11753461
Chr1	11752841	11753841
Chr1	11780498	11781498
Chr1	11789095	11790095
Chr1	11790042	11791042
Chr1	11790469	11791469
Chr1	11791332	11792332
Chr1	11791539	11792539
Chr1	11795000	11796000
Chr1	11795463	11796463
Chr1	11796082	11797082
Chr1	11796441	11797441
Chr1	11796836	11797836
Chr1	11797364	11798364
Chr1	11797722	11798722
Chr1	11799281	11800281
Chr1	11799942	11800942
Chr1	11800283	11801283
Chr1	11800554	11801554
Chr1	11808657	11809657
Chr1	11844510	11845510
Chr1	11845298	11846298
Chr1	11861245	11862245
Chr1	11863250	11864250
Chr1	11863613	11864613
Chr1	11864115	11865115
Chr1	11864231	11865231
Chr1	11865557	11866557
Chr1	11866919	11867919
Chr1	11876303	11877303
Chr1	11892028	11893028
Chr1	11964812	11965812
Chr1	11965445	11966445
Chr1	11968394	11969394
Chr1	11970280	11971280
Chr1	11970432	11971432
Chr1	11971329	11972329
Chr1	11971795	11972795
Chr1	11973465	11974465
Chr1	11984502	11985502
Chr1	11984592	11985592
Chr1	11986105	11987105
Chr1	11993460	11994460
Chr1	11993779	11994779
Chr1	11993911	11994911
Chr1	11994222	11995222
Chr1	11994622	11995622
Chr1	11995004	11996004
Chr1	12012504	12013504
Chr1	12013418	12014418
Chr1	12026873	12027873
Chr1	12039727	12040727
Chr1	12040170	12041170
Chr1	12041347	12042347
Chr1	12041463	12042463
Chr1	12041593	12042593
Chr1	12041732	12042732
Chr1	12041940	12042940
Chr1	12051555	12052555
Chr1	12064668	12065668
Chr1	12075972	12076972
Chr1	12078601	12079601
Chr1	12078946	12079946
Chr1	12079583	12080583
Chr1	12079784	12080784
Chr1	12079944	12080944
Chr1	12082112	12083112
Chr1	12106283	12107283
Chr1	12106501	12107501
Chr1	12106776	12107776
Chr1	12107156	12108156
Chr1	12107551	12108551
Chr1	12111000	12112000
Chr1	12127621	12128621
Chr1	12127739	12128739
Chr1	12128279	12129279
Chr1	12139354	12140354
Chr1	12145454	12146454
Chr1	12147540	12148540
Chr1	12148227	12149227
Chr1	12149094	12150094
Chr1	12184590	12185590
Chr1	12184908	12185908
Chr1	12185275	12186275
Chr1	12186023	12187023
Chr1	12186551	12187551
Chr1	12187170	12188170
Chr1	12187560	12188560
Chr1	12188019	12189019
Chr1	12191814	12192814
Chr1	12193692	12194692
Chr1	12203402	12204402
Chr1	12203601	12204601
Chr1	12203745	12204745
Chr1	12204908	12205908
Chr1	12206976	12207976
Chr1	12207955	12208955
Chr1	12208648	12209648
Chr1	12208850	12209850
Chr1	12209581	12210581
Chr1	12210198	12211198
Chr1	12211776	12212776
Chr1	12211971	12212971
Chr1	12212222	12213222
Chr1	12212691	12213691
Chr1	12212782	12213782
Chr1	12213060	12214060
Chr1	12215028	12216028
Chr1	12217513	12218513
Chr1	12217714	12218714
Chr1	12218421	12219421
Chr1	12219377	12220377
Chr1	12219622	12220622
Chr1	12220393	12221393
Chr1	12220741	12221741
Chr1	12220979	12221979
Chr1	12221506	12222506
Chr1	12225935	12226935
Chr1	12226072	12227072
Chr1	12226456	12227456
Chr1	12226864	12227864
Chr1	12227081	12228081
Chr1	12227833	12228833
Chr1	12228733	12229733
Chr1	12229223	12230223
Chr1	12229521	12230521
Chr1	12229695	12230695
Chr1	12229828	12230828
Chr1	12230003	12231003
Chr1	12232336	12233336
Chr1	12236403	12237403
Chr1	12237147	12238147
Chr1	12238237	12239237
Chr1	12243548	12244548
Chr1	12246042	12247042
Chr1	12247249	12248249
Chr1	12249373	12250373
Chr1	12261122	12262122
Chr1	12261380	12262380
Chr1	12263907	12264907
Chr1	12264265	12265265
Chr1	12264745	12265745
Chr1	12265633	12266633
Chr1	12265746	12266746
Chr1	12266326	12267326
Chr1	12267170	12268170
Chr1	12267507	12268507
Chr1	12267817	12268817
Chr1	12269877	12270877
Chr1	12270271	12271271
Chr1	12270659	12271659
Chr1	12270949	12271949
Chr1	12271097	12272097
Chr1	12289489	12290489
Chr1	12289851	12290851
Chr1	12303831	12304831
Chr1	12331825	12332825
Chr1	12374412	12375412
Chr1	12400161	12401161
Chr1	12400299	12401299
Chr1	12400443	12401443
Chr1	12401675	12402675
Chr1	12403629	12404629
Chr1	12404203	12405203
Chr1	12404493	12405493
Chr1	12404716	12405716
Chr1	12404996	12405996
Chr1	12405306	12406306
Chr1	12405566	12406566
Chr1	12444846	12445846
Chr1	12457685	12458685
Chr1	12467133	12468133
Chr1	12492065	12493065
Chr1	12493430	12494430
Chr1	12495404	12496404
Chr1	12495716	12496716
Chr1	12498185	12499185
Chr1	12508516	12509516
Chr1	12508667	12509667
Chr1	12509193	12510193
Chr1	12510049	12511049
Chr1	12511609	12512609
Chr1	12511690	12512690
Chr1	12513128	12514128
Chr1	12516291	12517291
Chr1	12532352	12533352
Chr1	12532874	12533874
Chr1	12533365	12534365
Chr1	12535618	12536618
Chr1	12537967	12538967
Chr1	12538278	12539278
Chr1	12540606	12541606
Chr1	12569804	12570804
Chr1	12570304	12571304
Chr1	12570940	12571940
Chr1	12571669	12572669
Chr1	12648603	12649603
Chr1	12649544	12650544
Chr1	12654855	12655855
Chr1	12661176	12662176
Chr1	12663984	12664984
Chr1	12664697	12665697
Chr1	12665857	12666857
Chr1	12673116	12674116
Chr1	12673709	12674709
Chr1	12675621	12676621
Chr1	12675755	12676755
Chr1	12676863	12677863
Chr1	12677672	12678672
Chr1	12678348	12679348
Chr1	12679300	12680300
Chr1	12680207	12681207
Chr1	13991863	13992863
Chr1	14025549	14026549
Chr1	14026478	14027478
Chr1	14027583	14028583
Chr1	14027992	14028992
Chr1	14028178	14029178
Chr1	14028339	14029339
Chr1	14028905	14029905
Chr1	14029489	14030489
Chr1	14030941	14031941
Chr1	14032636	14033636
Chr1	14054188	14055188
Chr1	14054291	14055291
Chr1	14054636	14055636
Chr1	14056954	14057954
Chr1	14058114	14059114
Chr1	14058460	14059460
Chr1	14059164	14060164
Chr1	14060574	14061574
Chr1	14063478	14064478
Chr1	14063605	14064605
Chr1	14063749	14064749
Chr1	14066587	14067587
Chr1	14074695	14075695
Chr1	14075295	14076295
Chr1	14075830	14076830
Chr1	14076094	14077094
Chr1	14076207	14077207
Chr1	14076504	14077504
Chr1	14079776	14080776
Chr1	14080420	14081420
Chr1	14085113	14086113
Chr1	14085269	14086269
Chr1	14085430	14086430
Chr1	14086377	14087377
Chr1	14087111	14088111
Chr1	14087676	14088676
Chr1	14089148	14090148
Chr1	14091179	14092179
Chr1	14107450	14108450
Chr1	14110653	14111653
Chr1	14122342	14123342
Chr1	14123438	14124438
Chr1	14123608	14124608
Chr1	14137310	14138310
Chr1	14137505	14138505
Chr1	14137866	14138866
Chr1	14286552	14287552
Chr1	15578798	15579798
Chr1	15579091	15580091
Chr1	15579233	15580233
Chr1	15667865	15668865
Chr1	15668170	15669170
Chr1	15670992	15671992
Chr1	15671125	15672125
Chr1	15672528	15673528
Chr1	15673391	15674391
Chr1	15678723	15679723
Chr1	15710474	15711474
Chr1	15712301	15713301
Chr1	15731511	15732511
Chr1	15733475	15734475
Chr1	15734177	15735177
Chr1	15734655	15735655
Chr1	15735401	15736401
Chr1	15736191	15737191
Chr1	15736354	15737354
Chr1	15736689	15737689
Chr1	15737532	15738532
Chr1	15738092	15739092
Chr1	15739692	15740692
Chr1	15740125	15741125
Chr1	15741869	15742869
Chr1	15742075	15743075
Chr1	15742289	15743289
Chr1	15742559	15743559
Chr1	15743509	15744509
Chr1	15747070	15748070
Chr1	15747848	15748848
Chr1	15747993	15748993
Chr1	15752429	15753429
Chr1	15752579	15753579
Chr1	15752711	15753711
Chr1	15753169	15754169
Chr1	15753360	15754360
Chr1	15753593	15754593
Chr1	15755936	15756936
Chr1	15756370	15757370
Chr1	15756539	15757539
Chr1	15757287	15758287
Chr1	15757965	15758965
Chr1	15758074	15759074
Chr1	15758171	15759171
Chr1	15758288	15759288
Chr1	15849594	15850594
Chr1	15849866	15850866
Chr1	15850915	15851915
Chr1	15852646	15853646
Chr1	15903861	15904861
Chr1	15904052	15905052
Chr1	15905265	15906265
Chr1	15905710	15906710
Chr1	15905969	15906969
Chr1	15909950	15910950
Chr1	15910453	15911453
Chr1	15910664	15911664
Chr1	15910901	15911901
Chr1	15911141	15912141
Chr1	15911438	15912438
Chr1	15929110	15930110
Chr1	15930137	15931137
Chr1	15930321	15931321
Chr1	15942672	15943672
Chr1	15943379	15944379
Chr1	15944100	15945100
Chr1	15944465	15945465
Chr1	15946289	15947289
Chr1	15949272	15950272
Chr1	16010562	16011562
Chr1	16010845	16011845
Chr1	16011160	16012160
Chr1	16012177	16013177
Chr1	16013801	16014801
Chr1	16022856	16023856
Chr1	16023292	16024292
Chr1	16063673	16064673
Chr1	16123022	16124022
Chr1	16156420	16157420
Chr1	16157113	16158113
Chr1	16159178	16160178
Chr1	16159307	16160307
Chr1	16159560	16160560
Chr1	16161122	16162122
Chr1	16162838	16163838
Chr1	16163657	16164657
Chr1	16163859	16164859
Chr1	16164005	16165005
Chr1	16164285	16165285
Chr1	16172643	16173643
Chr1	16172821	16173821
Chr1	16173006	16174006
Chr1	16173515	16174515
Chr1	16174216	16175216
Chr1	16175105	16176105
Chr1	16189979	16190979
Chr1	16206355	16207355
Chr1	16219374	16220374
Chr1	16220144	16221144
Chr1	16242157	16243157
Chr1	16243185	16244185
Chr1	16244746	16245746
Chr1	16245542	16246542
Chr1	16250349	16251349
Chr1	16263679	16264679
Chr1	16267349	16268349
Chr1	16275685	16276685
Chr1	16276331	16277331
Chr1	16276569	16277569
Chr1	16277121	16278121
Chr1	16277442	16278442
Chr1	16277602	16278602
Chr1	16278338	16279338
Chr1	16279757	16280757
Chr1	16279987	16280987
Chr1	16291343	16292343
Chr1	16292302	16293302
Chr1	16293697	16294697
Chr1	16301007	16302007
Chr1	16301311	16302311
Chr1	16302034	16303034
Chr1	16302754	16303754
Chr1	16302968	16303968
Chr1	16335172	16336172
Chr1	16396249	16397249
Chr1	16398168	16399168
Chr1	16405733	16406733
Chr1	16405830	16406830
Chr1	16406418	16407418
Chr1	16449144	16450144
Chr1	16449918	16450918
Chr1	16487681	16488681
Chr1	16487931	16488931
Chr1	16488408	16489408
Chr1	16488808	16489808
Chr1	16490342	16491342
Chr1	16490463	16491463
Chr1	16490582	16491582
Chr1	16493904	16494904
Chr1	16494867	16495867
Chr1	16495100	16496100
Chr1	16496408	16497408
Chr1	16528765	16529765
Chr1	16532716	16533716
Chr1	16533479	16534479
Chr1	16534315	16535315
Chr1	16541837	16542837
Chr1	16542029	16543029
Chr1	16542875	16543875
Chr1	16543621	16544621
Chr1	16544176	16545176
Chr1	16561594	16562594
Chr1	16562401	16563401
Chr1	16563180	16564180
Chr1	16564003	16565003
Chr1	16564663	16565663
Chr1	16600422	16601422
Chr1	16616867	16617867
Chr1	16660845	16661845
Chr1	16676239	16677239
Chr1	16676961	16677961
Chr1	16677171	16678171
Chr1	16677765	16678765
Chr1	16678556	16679556
Chr1	16679062	16680062
Chr1	16679618	16680618
Chr1	16689481	16690481
Chr1	16693454	16694454
Chr1	16694415	16695415
Chr1	16697946	16698946
Chr1	16703118	16704118
Chr1	16705491	16706491
Chr1	16713029	16714029
Chr1	16713317	16714317
Chr1	16713419	16714419
Chr1	16714018	16715018
Chr1	16714520	16715520
Chr1	16718105	16719105
Chr1	16718279	16719279
Chr1	16718747	16719747
Chr1	16729001	16730001
Chr1	16745025	16746025
Chr1	16746857	16747857
Chr1	16747334	16748334
Chr1	16765704	16766704
Chr1	16766894	16767894
Chr1	16768980	16769980
Chr1	16769130	16770130
Chr1	16773482	16774482
Chr1	16778234	16779234
Chr1	16787775	16788775
Chr1	16817907	16818907
Chr1	16823636	16824636
Chr1	16824002	16825002
Chr1	16824096	16825096
Chr1	16824579	16825579
Chr1	16824734	16825734
Chr1	16825256	16826256
Chr1	16825805	16826805
Chr1	16829680	16830680
Chr1	16829868	16830868
Chr1	16830226	16831226
Chr1	16830429	16831429
Chr1	16832156	16833156
Chr1	16837717	16838717
Chr1	16838483	16839483
Chr1	16839124	16840124
Chr1	16839415	16840415
Chr1	16839552	16840552
Chr1	16839798	16840798
Chr1	16840033	16841033
Chr1	16840287	16841287
Chr1	16840422	16841422
Chr1	16840844	16841844
Chr1	16840993	16841993
Chr1	16870766	16871766
Chr1	16917602	16918602
Chr1	16917942	16918942
Chr1	16918262	16919262
Chr1	16939747	16940747
Chr1	16940923	16941923
Chr1	16941862	16942862
Chr1	16942091	16943091
Chr1	16943004	16944004
Chr1	16943108	16944108
Chr1	16946745	16947745
Chr1	16947642	16948642
Chr1	16947897	16948897
Chr1	16948410	16949410
Chr1	16949276	16950276
Chr1	16949480	16950480
Chr1	16950467	16951467
Chr1	16957816	16958816
Chr1	16957994	16958994
Chr1	16958297	16959297
Chr1	16967296	16968296
Chr1	16967972	16968972
Chr1	16969506	16970506
Chr1	16969690	16970690
Chr1	16969919	16970919
Chr1	16970552	16971552
Chr1	16971713	16972713
Chr1	16972135	16973135
Chr1	16972534	16973534
Chr1	16973549	16974549
Chr1	16973999	16974999
Chr1	17003059	17004059
Chr1	17004000	17005000
Chr1	17004284	17005284
Chr1	17004717	17005717
Chr1	17025745	17026745
Chr1	17026595	17027595
Chr1	17027266	17028266
Chr1	17032738	17033738
Chr1	17051528	17052528
Chr1	17053541	17054541
Chr1	17215087	17216087
Chr1	17215642	17216642
Chr1	17221267	17222267
Chr1	17221449	17222449
Chr1	17221652	17222652
Chr1	17221839	17222839
Chr1	17222209	17223209
Chr1	17222436	17223436
Chr1	17222757	17223757
Chr1	17223133	17224133
Chr1	17226928	17227928
Chr1	17231073	17232073
Chr1	17232139	17233139
Chr1	17232480	17233480
Chr1	17232626	17233626
Chr1	17232942	17233942
Chr1	17233334	17234334
Chr1	17233702	17234702
Chr1	17236011	17237011
Chr1	17236583	17237583
Chr1	17239337	17240337
Chr1	17239533	17240533
Chr1	17240223	17241223
Chr1	17241601	17242601
Chr1	17242129	17243129
Chr1	17247573	17248573
Chr1	17247691	17248691
Chr1	17247895	17248895
Chr1	17248291	17249291
Chr1	17277406	17278406
Chr1	17277771	17278771
Chr1	17286646	17287646
Chr1	17287252	17288252
Chr1	17287742	17288742
Chr1	17287908	17288908
Chr1	17336672	17337672
Chr1	17336852	17337852
Chr1	17337390	17338390
Chr1	17338071	17339071
Chr1	17372186	17373186
Chr1	17378149	17379149
Chr1	17378329	17379329
Chr1	17378675	17379675
Chr1	17379582	17380582
Chr1	17380065	17381065
Chr1	17380712	17381712
Chr1	17385401	17386401
Chr1	17507880	17508880
Chr1	17527019	17528019
Chr1	17738471	17739471
Chr1	17745667	17746667
Chr1	17746416	17747416
Chr1	17760684	17761684
Chr1	17762073	17763073
Chr1	17763226	17764226
Chr1	17763656	17764656
Chr1	17764844	17765844
Chr1	17765890	17766890
Chr1	17766356	17767356
Chr1	17766484	17767484
Chr1	17766930	17767930
Chr1	17767178	17768178
Chr1	17767612	17768612
Chr1	18396092	18397092
Chr1	19228180	19229180
Chr1	19230098	19231098
Chr1	19230351	19231351
Chr1	19232280	19233280
Chr1	19232731	19233731
Chr1	19234118	19235118
Chr1	19237042	19238042
Chr1	19238164	19239164
Chr1	19238962	19239962
Chr1	19239413	19240413
Chr1	19239614	19240614
Chr1	19249614	19250614
Chr1	19249751	19250751
Chr1	19250423	19251423
Chr1	19251004	19252004
Chr1	19255078	19256078
Chr1	19255175	19256175
Chr1	19255606	19256606
Chr1	19255746	19256746
Chr1	19256816	19257816
Chr1	19258567	19259567
Chr1	19259467	19260467
Chr1	19260815	19261815
Chr1	19261316	19262316
Chr1	19261615	19262615
Chr1	19262151	19263151
Chr1	19265781	19266781
Chr1	19270830	19271830
Chr1	19270969	19271969
Chr1	19271093	19272093
Chr1	19271421	19272421
Chr1	19272317	19273317
Chr1	19273035	19274035
Chr1	19273983	19274983
Chr1	19274271	19275271
Chr1	19274671	19275671
Chr1	19275832	19276832
Chr1	19276243	19277243
Chr1	19276510	19277510
Chr1	19276626	19277626
Chr1	19276978	19277978
Chr1	19277407	19278407
Chr1	19278811	19279811
Chr1	19280202	19281202
Chr1	19281587	19282587
Chr1	19282105	19283105
Chr1	19282315	19283315
Chr1	19282767	19283767
Chr1	19283535	19284535
Chr1	19283899	19284899
Chr1	19284123	19285123
Chr1	19337226	19338226
Chr1	19338440	19339440
Chr1	19398222	19399222
Chr1	19400617	19401617
Chr1	19401459	19402459
Chr1	19440875	19441875
Chr1	19450512	19451512
Chr1	19505900	19506900
Chr1	19528485	19529485
Chr1	19528669	19529669
Chr1	19535350	19536350
Chr1	19535467	19536467
Chr1	19536224	19537224
Chr1	19537003	19538003
Chr1	19537157	19538157
Chr1	19543870	19544870
Chr1	19550009	19551009
Chr1	19566205	19567205
Chr1	19567320	19568320
Chr1	19576773	19577773
Chr1	19577081	19578081
Chr1	19637034	19638034
Chr1	19637685	19638685
Chr1	19637794	19638794
Chr1	19638375	19639375
Chr1	19639107	19640107
Chr1	19639496	19640496
Chr1	19639936	19640936
Chr1	19640122	19641122
Chr1	19640716	19641716
Chr1	19656895	19657895
Chr1	19662752	19663752
Chr1	19667896	19668896
Chr1	19668040	19669040
Chr1	19704584	19705584
Chr1	19714253	19715253
Chr1	19716368	19717368
Chr1	19717314	19718314
Chr1	19718155	19719155
Chr1	19733198	19734198
Chr1	19750760	19751760
Chr1	19759045	19760045
Chr1	19762860	19763860
Chr1	19763102	19764102
Chr1	19765128	19766128
Chr1	19765853	19766853
Chr1	19766025	19767025
Chr1	19768944	19769944
Chr1	19771929	19772929
Chr1	19772649	19773649
Chr1	19773530	19774530
Chr1	19774395	19775395
Chr1	19774651	19775651
Chr1	19783816	19784816
Chr1	19784157	19785157
Chr1	19784806	19785806
Chr1	19785226	19786226
Chr1	19785801	19786801
Chr1	19786215	19787215
Chr1	19789002	19790002
Chr1	19789405	19790405
Chr1	19790635	19791635
Chr1	19792541	19793541
Chr1	19794113	19795113
Chr1	19794512	19795512
Chr1	19795012	19796012
Chr1	19795215	19796215
Chr1	19795482	19796482
Chr1	19795712	19796712
Chr1	19795975	19796975
Chr1	19798280	19799280
Chr1	19800394	19801394
Chr1	19801180	19802180
Chr1	19802908	19803908
Chr1	19803515	19804515
Chr1	19803708	19804708
Chr1	19804036	19805036
Chr1	19804243	19805243
Chr1	19804536	19805536
Chr1	19805477	19806477
Chr1	19808886	19809886
Chr1	19809420	19810420
Chr1	19809635	19810635
Chr1	19810169	19811169
Chr1	19811011	19812011
Chr1	19811260	19812260
Chr1	19811880	19812880
Chr1	19812600	19813600
Chr1	19812874	19813874
Chr1	19813960	19814960
Chr1	19814344	19815344
Chr1	19833612	19834612
Chr1	19860349	19861349
Chr1	19908440	19909440
Chr1	19920750	19921750
Chr1	19923318	19924318
Chr1	19926432	19927432
Chr1	19933033	19934033
Chr1	19939141	19940141
Chr1	19941369	19942369
Chr1	19969336	19970336
Chr1	19969660	19970660
Chr1	19969771	19970771
Chr1	19970102	19971102
Chr1	19970724	19971724
Chr1	19970977	19971977
Chr1	19972200	19973200
Chr1	19973810	19974810
Chr1	19985863	19986863
Chr1	19990108	19991108
Chr1	19990247	19991247
Chr1	19990438	19991438
Chr1	19990581	19991581
Chr1	19990848	19991848
Chr1	19990988	19991988
Chr1	19995013	19996013
Chr1	20014322	20015322
Chr1	20016037	20017037
Chr1	20037314	20038314
Chr1	20091008	20092008
Chr1	20207882	20208882
Chr1	20208351	20209351
Chr1	20209031	20210031
Chr1	20225332	20226332
Chr1	20384635	20385635
Chr1	20497392	20498392
Chr1	20497630	20498630
Chr1	20510774	20511774
Chr1	20511566	20512566
Chr1	20512459	20513459
Chr1	20513879	20514879
Chr1	20538918	20539918
Chr1	20575140	20576140
Chr1	20575496	20576496
Chr1	20648351	20649351
Chr1	20811611	20812611
Chr1	20811741	20812741
Chr1	20811972	20812972
Chr1	20812290	20813290
Chr1	20833944	20834944
Chr1	20834526	20835526
Chr1	20959299	20960299
Chr1	20959756	20960756
Chr1	20960341	20961341
Chr1	20986973	20987973
Chr1	20987541	20988541
Chr1	20988181	20989181
Chr1	20988421	20989421
Chr1	21058397	21059397
Chr1	21059177	21060177
Chr1	21090815	21091815
Chr1	21110061	21111061
Chr1	21110835	21111835
Chr1	21111509	21112509
Chr1	21111663	21112663
Chr1	21112857	21113857
Chr1	21114022	21115022
Chr1	21114253	21115253
Chr1	21115137	21116137
Chr1	21229623	21230623
Chr1	21258451	21259451
Chr1	21258818	21259818
Chr1	21348549	21349549
Chr1	21467297	21468297
Chr1	21475600	21476600
Chr1	21500466	21501466
Chr1	21500689	21501689
Chr1	21500893	21501893
Chr1	21501069	21502069
Chr1	21501253	21502253
Chr1	21501523	21502523
Chr1	21501977	21502977
Chr1	21502365	21503365
Chr1	21503056	21504056
Chr1	21583129	21584129
Chr1	21584415	21585415
Chr1	21584520	21585520
Chr1	21587747	21588747
Chr1	21588014	21589014
Chr1	21596040	21597040
Chr1	21596449	21597449
Chr1	21597965	21598965
Chr1	21602423	21603423
Chr1	21605029	21606029
Chr1	21605498	21606498
Chr1	21605908	21606908
Chr1	21606257	21607257
Chr1	21607276	21608276
Chr1	21607478	21608478
Chr1	21615705	21616705
Chr1	21615928	21616928
Chr1	21616156	21617156
Chr1	21616831	21617831
Chr1	21617356	21618356
Chr1	21621785	21622785
Chr1	21624871	21625871
Chr1	21625077	21626077
Chr1	21625348	21626348
Chr1	21628123	21629123
Chr1	21649285	21650285
Chr1	21650928	21651928
Chr1	21651745	21652745
Chr1	21652230	21653230
Chr1	21655368	21656368
Chr1	21655497	21656497
Chr1	21655647	21656647
Chr1	21655957	21656957
Chr1	21656088	21657088
Chr1	21658010	21659010
Chr1	21658396	21659396
Chr1	21659124	21660124
Chr1	21659253	21660253
Chr1	21659510	21660510
Chr1	21660424	21661424
Chr1	21662004	21663004
Chr1	21669631	21670631
Chr1	21669846	21670846
Chr1	21670401	21671401
Chr1	21671093	21672093
Chr1	21671752	21672752
Chr1	21672572	21673572
Chr1	21672734	21673734
Chr1	21672945	21673945
Chr1	21696694	21697694
Chr1	21723846	21724846
Chr1	21765968	21766968
Chr1	21766676	21767676
Chr1	21766948	21767948
Chr1	21767166	21768166
Chr1	21977786	21978786
Chr1	22029290	22030290
Chr1	22095102	22096102
Chr1	22099753	22100753
Chr1	22102223	22103223
Chr1	22105717	22106717
Chr1	22106000	22107000
Chr1	22106376	22107376
Chr1	22106498	22107498
Chr1	22106649	22107649
Chr1	22107681	22108681
Chr1	22108889	22109889
Chr1	22110056	22111056
Chr1	22110634	22111634
Chr1	22283341	22284341
Chr1	22349870	22350870
Chr1	22350038	22351038
Chr1	22350482	22351482
Chr1	22351618	22352618
Chr1	22352727	22353727
Chr1	22353135	22354135
Chr1	22357497	22358497
Chr1	22357735	22358735
Chr1	22364745	22365745
Chr1	22366033	22367033
Chr1	22367625	22368625
Chr1	22369376	22370376
Chr1	22370994	22371994
Chr1	22378566	22379566
Chr1	22379592	22380592
Chr1	22380579	22381579
Chr1	22380723	22381723
Chr1	22381421	22382421
Chr1	22382933	22383933
Chr1	22383167	22384167
Chr1	22384045	22385045
Chr1	22384438	22385438
Chr1	22386548	22387548
Chr1	22390352	22391352
Chr1	22390920	22391920
Chr1	22391493	22392493
Chr1	22393976	22394976
Chr1	22394523	22395523
Chr1	22397461	22398461
Chr1	22398028	22399028
Chr1	22404757	22405757
Chr1	22405669	22406669
Chr1	22415134	22416134
Chr1	22415639	22416639
Chr1	22416034	22417034
Chr1	22416567	22417567
Chr1	22418545	22419545
Chr1	22423161	22424161
Chr1	22425498	22426498
Chr1	22425770	22426770
Chr1	22426473	22427473
Chr1	22430244	22431244
Chr1	22430854	22431854
Chr1	22431065	22432065
Chr1	22431593	22432593
Chr1	22432042	22433042
Chr1	22435633	22436633
Chr1	22450260	22451260
Chr1	22725107	22726107
Chr1	22725322	22726322
Chr1	22776339	22777339
Chr1	22776472	22777472
Chr1	22776579	22777579
Chr1	22776850	22777850
Chr1	22778252	22779252
[truncated: 154,452 more rows]

## Sheet: silencers in monocyte
Chromosome	start	end
Chr1	237252	238252
Chr1	521083	522083
Chr1	799098	800098
Chr1	802423	803423
Chr1	824497	825497
Chr1	856105	857105
Chr1	931935	932935
Chr1	973245	974245
Chr1	996347	997347
Chr1	996834	997834
Chr1	997351	998351
Chr1	1014448	1015448
Chr1	1091023	1092023
Chr1	1150127	1151127
Chr1	1241596	1242596
Chr1	1278279	1279279
Chr1	1307126	1308126
Chr1	1311787	1312787
Chr1	1854153	1855153
Chr1	1902291	1903291
Chr1	1904484	1905484
Chr1	2061313	2062313
Chr1	2070953	2071953
Chr1	2077303	2078303
Chr1	2079439	2080439
Chr1	2080299	2081299
Chr1	2094341	2095341
Chr1	2105413	2106413
Chr1	2131930	2132930
Chr1	2134840	2135840
Chr1	2140879	2141879
Chr1	2141646	2142646
Chr1	2312861	2313861
Chr1	2406273	2407273
Chr1	2408549	2409549
Chr1	2485999	2486999
Chr1	2499289	2500289
Chr1	2505553	2506553
Chr1	2513510	2514510
Chr1	2514349	2515349
Chr1	2583191	2584191
Chr1	2583982	2584982
Chr1	2584673	2585673
Chr1	2585144	2586144
Chr1	2585741	2586741
Chr1	2586555	2587555
Chr1	2587192	2588192
Chr1	2614344	2615344
Chr1	2615012	2616012
Chr1	2615808	2616808
Chr1	2620587	2621587
Chr1	2621337	2622337
Chr1	2621941	2622941
Chr1	2622565	2623565
Chr1	2623080	2624080
Chr1	2627601	2628601
Chr1	2628733	2629733
Chr1	2629485	2630485
Chr1	2630296	2631296
Chr1	2688667	2689667
Chr1	2917351	2918351
Chr1	3236180	3237180
Chr1	3284500	3285500
Chr1	3369384	3370384
Chr1	3481451	3482451
Chr1	3615714	3616714
Chr1	3800557	3801557
Chr1	4362688	4363688
Chr1	5232685	5233685
Chr1	5569628	5570628
Chr1	5729908	5730908
Chr1	5731127	5732127
Chr1	5731551	5732551
Chr1	5732062	5733062
Chr1	5734894	5735894
Chr1	5805561	5806561
Chr1	6020691	6021691
Chr1	6053381	6054381
Chr1	6094149	6095149
Chr1	6140711	6141711
Chr1	6168578	6169578
Chr1	6245540	6246540
Chr1	6298743	6299743
Chr1	6407807	6408807
Chr1	6418658	6419658
Chr1	6474014	6475014
Chr1	6497783	6498783
Chr1	6504111	6505111
Chr1	6546203	6547203
Chr1	6631562	6632562
Chr1	6660297	6661297
Chr1	6706237	6707237
Chr1	7048739	7049739
Chr1	7101379	7102379
Chr1	7339820	7340820
Chr1	7620268	7621268
Chr1	7710039	7711039
Chr1	7729175	7730175
Chr1	7741837	7742837
Chr1	7751168	7752168
Chr1	7831810	7832810
Chr1	8034991	8035991
Chr1	8154231	8155231
Chr1	8231825	8232825
Chr1	8286431	8287431
Chr1	8329290	8330290
Chr1	8904138	8905138
Chr1	8931730	8932730
Chr1	8940267	8941267
Chr1	8970059	8971059
Chr1	9022650	9023650
Chr1	9047749	9048749
Chr1	9071736	9072736
Chr1	9161072	9162072
Chr1	9163340	9164340
Chr1	9165244	9166244
Chr1	9172602	9173602
Chr1	9179490	9180490
Chr1	9180018	9181018
Chr1	9222569	9223569
Chr1	9240592	9241592
Chr1	9241011	9242011
Chr1	9302664	9303664
Chr1	9326828	9327828
Chr1	9348747	9349747
Chr1	9472545	9473545
Chr1	9513071	9514071
Chr1	9515507	9516507
Chr1	9649445	9650445
Chr1	9651020	9652020
Chr1	9675337	9676337
Chr1	9685889	9686889
Chr1	9690103	9691103
Chr1	9717431	9718431
Chr1	9938314	9939314
Chr1	9968719	9969719
Chr1	10312041	10313041
Chr1	10487764	10488764
Chr1	10875532	10876532
Chr1	10928193	10929193
Chr1	11001731	11002731
Chr1	11003636	11004636
Chr1	11097354	11098354
Chr1	11301412	11302412
Chr1	11544176	11545176
Chr1	11574999	11575999
Chr1	11705430	11706430
Chr1	11768337	11769337
Chr1	11797489	11798489
Chr1	11799301	11800301
Chr1	11800157	11801157
Chr1	11854100	11855100
Chr1	11953668	11954668
Chr1	11954916	11955916
Chr1	12090979	12091979
Chr1	12114582	12115582
Chr1	12195403	12196403
Chr1	12201289	12202289
Chr1	12211343	12212343
Chr1	12211942	12212942
Chr1	12225111	12226111
Chr1	12227929	12228929
Chr1	12229954	12230954
Chr1	12231346	12232346
Chr1	12232803	12233803
Chr1	12239247	12240247
Chr1	12241407	12242407
Chr1	12242120	12243120
Chr1	12246295	12247295
Chr1	12256042	12257042
Chr1	12266746	12267746
Chr1	12268368	12269368
Chr1	12271080	12272080
Chr1	12272019	12273019
Chr1	12275548	12276548
Chr1	12626381	12627381
Chr1	12653288	12654288
Chr1	12657454	12658454
Chr1	12660964	12661964
Chr1	12661979	12662979
Chr1	12711119	12712119
Chr1	12718695	12719695
Chr1	13786487	13787487
Chr1	13990832	13991832
Chr1	14139792	14140792
Chr1	14286565	14287565
Chr1	15068419	15069419
Chr1	15129887	15130887
Chr1	15241559	15242559
Chr1	15252659	15253659
Chr1	15287146	15288146
Chr1	15353690	15354690
Chr1	15357070	15358070
Chr1	15426563	15427563
Chr1	15505000	15506000
Chr1	15515617	15516617
Chr1	15546963	15547963
Chr1	15585558	15586558
Chr1	15603146	15604146
Chr1	15690992	15691992
Chr1	15791897	15792897
Chr1	15811808	15812808
Chr1	15941874	15942874
Chr1	16009308	16010308
Chr1	16067542	16068542
Chr1	16068517	16069517
Chr1	16081421	16082421
Chr1	16141635	16142635
Chr1	16278386	16279386
Chr1	16280097	16281097
Chr1	16283622	16284622
Chr1	16315808	16316808
Chr1	16334243	16335243
Chr1	16408530	16409530
Chr1	16513963	16514963
Chr1	16515104	16516104
Chr1	16538378	16539378
Chr1	16544620	16545620
Chr1	16545330	16546330
Chr1	16570555	16571555
Chr1	16676211	16677211
Chr1	16887546	16888546
Chr1	16891497	16892497
Chr1	16892783	16893783
Chr1	16914306	16915306
Chr1	16934671	16935671
Chr1	16945011	16946011
Chr1	16947693	16948693
Chr1	16954534	16955534
Chr1	16957639	16958639
Chr1	16960192	16961192
Chr1	16967640	16968640
Chr1	16969082	16970082
Chr1	17029321	17030321
Chr1	17032271	17033271
Chr1	17035958	17036958
Chr1	17036411	17037411
Chr1	17037152	17038152
Chr1	17046653	17047653
Chr1	17087825	17088825
Chr1	17229769	17230769
Chr1	17277682	17278682
Chr1	17336813	17337813
Chr1	17372252	17373252
Chr1	17387696	17388696
Chr1	17421012	17422012
Chr1	17425895	17426895
Chr1	17449221	17450221
Chr1	17531284	17532284
Chr1	17559698	17560698
Chr1	17562121	17563121
Chr1	17565565	17566565
Chr1	17577925	17578925
Chr1	17600384	17601384
Chr1	17613107	17614107
Chr1	17629757	17630757
Chr1	17633813	17634813
Chr1	17635969	17636969
Chr1	17662235	17663235
Chr1	17714102	17715102
Chr1	17732344	17733344
Chr1	17828466	17829466
Chr1	17834100	17835100
Chr1	17929624	17930624
Chr1	17930285	17931285
Chr1	17935698	17936698
Chr1	17945319	17946319
Chr1	17947574	17948574
Chr1	17957085	17958085
Chr1	17960284	17961284
Chr1	17964846	17965846
Chr1	17965339	17966339
Chr1	18625887	18626887
Chr1	18898174	18899174
Chr1	18980025	18981025
Chr1	18999311	19000311
Chr1	19210307	19211307
Chr1	19249695	19250695
Chr1	19276261	19277261
Chr1	19278760	19279760
Chr1	19291860	19292860
Chr1	19334016	19335016
Chr1	19391774	19392774
Chr1	19640464	19641464
Chr1	19642280	19643280
Chr1	19762044	19763044
Chr1	19908415	19909415
Chr1	19977317	19978317
Chr1	19986691	19987691
Chr1	20030713	20031713
Chr1	20041794	20042794
Chr1	20093766	20094766
Chr1	20209286	20210286
Chr1	20452252	20453252
Chr1	20521354	20522354
Chr1	20848516	20849516
Chr1	20901371	20902371
Chr1	20911080	20912080
Chr1	20928206	20929206
Chr1	20960958	20961958
Chr1	21422215	21423215
Chr1	21543040	21544040
Chr1	21558129	21559129
Chr1	21581395	21582395
Chr1	21596394	21597394
Chr1	21618830	21619830
Chr1	21625148	21626148
Chr1	21625854	21626854
Chr1	21646584	21647584
Chr1	21648521	21649521
Chr1	21651980	21652980
Chr1	21653363	21654363
Chr1	21658933	21659933
Chr1	21665666	21666666
Chr1	21666352	21667352
Chr1	21688754	21689754
Chr1	21694593	21695593
Chr1	21695104	21696104
Chr1	21695764	21696764
Chr1	21696692	21697692
Chr1	21779162	21780162
Chr1	21857423	21858423
Chr1	21914833	21915833
Chr1	21921700	21922700
Chr1	22290135	22291135
Chr1	22375258	22376258
Chr1	22458081	22459081
Chr1	22594092	22595092
Chr1	22597198	22598198
Chr1	22742760	22743760
Chr1	22754776	22755776
Chr1	22875594	22876594
Chr1	22968177	22969177
Chr1	22988518	22989518
Chr1	23030631	23031631
Chr1	23061980	23062980
Chr1	23064189	23065189
Chr1	23104868	23105868
Chr1	23142382	23143382
Chr1	23143954	23144954
Chr1	23177693	23178693
Chr1	23256466	23257466
Chr1	23281502	23282502
Chr1	23302649	23303649
Chr1	23312235	23313235
Chr1	23510840	23511840
Chr1	23729713	23730713
Chr1	23733030	23734030
Chr1	23870885	23871885
Chr1	23897688	23898688
Chr1	23960592	23961592
Chr1	23961122	23962122
Chr1	23964422	23965422
Chr1	23983855	23984855
Chr1	24077473	24078473
Chr1	24119518	24120518
Chr1	24136433	24137433
Chr1	24137640	24138640
Chr1	24163886	24164886
Chr1	24193062	24194062
Chr1	24196701	24197701
Chr1	24237020	24238020
Chr1	24422858	24423858
Chr1	24425240	24426240
Chr1	24452517	24453517
Chr1	24524065	24525065
Chr1	24525455	24526455
Chr1	24717455	24718455
Chr1	24779184	24780184
Chr1	24913379	24914379
Chr1	25014721	25015721
Chr1	25068501	25069501
Chr1	25175856	25176856
Chr1	25224306	25225306
Chr1	25278538	25279538
Chr1	25281267	25282267
Chr1	25281845	25282845
Chr1	25298457	25299457
Chr1	25299490	25300490
Chr1	25314344	25315344
Chr1	25332937	25333937
Chr1	25334245	25335245
Chr1	25339371	25340371
Chr1	25343633	25344633
Chr1	25347520	25348520
Chr1	25349918	25350918
Chr1	25353041	25354041
Chr1	25353909	25354909
Chr1	25356226	25357226
Chr1	25357737	25358737
Chr1	25361657	25362657
Chr1	25363307	25364307
Chr1	25363899	25364899
Chr1	25376184	25377184
Chr1	25474879	25475879
Chr1	25543168	25544168
Chr1	25711779	25712779
Chr1	25715229	25716229
Chr1	25729163	25730163
Chr1	25896350	25897350
Chr1	25898932	25899932
Chr1	25945188	25946188
Chr1	26074810	26075810
Chr1	26136982	26137982
Chr1	26353889	26354889
Chr1	26365184	26366184
Chr1	26494973	26495973
Chr1	26603245	26604245
Chr1	26607589	26608589
Chr1	26612041	26613041
Chr1	26642805	26643805
Chr1	26644847	26645847
Chr1	26690623	26691623
Chr1	26693412	26694412
Chr1	26713577	26714577
Chr1	26715408	26716408
Chr1	26717641	26718641
Chr1	26784200	26785200
Chr1	26796925	26797925
Chr1	26856585	26857585
Chr1	26860001	26861001
Chr1	26864891	26865891
Chr1	26869787	26870787
Chr1	26873094	26874094
Chr1	26880694	26881694
Chr1	26903978	26904978
Chr1	26907010	26908010
Chr1	26908478	26909478
Chr1	26910315	26911315
Chr1	26928527	26929527
Chr1	27125617	27126617
Chr1	27157908	27158908
Chr1	27237934	27238934
Chr1	27250253	27251253
Chr1	27276967	27277967
Chr1	27293081	27294081
Chr1	27297051	27298051
Chr1	27298195	27299195
Chr1	27322042	27323042
Chr1	27322919	27323919
Chr1	27324556	27325556
Chr1	27368087	27369087
Chr1	27413945	27414945
Chr1	27429622	27430622
Chr1	27435275	27436275
Chr1	27436815	27437815
Chr1	27442469	27443469
Chr1	27442900	27443900
Chr1	27443357	27444357
Chr1	27443762	27444762
Chr1	27458137	27459137
Chr1	27460192	27461192
Chr1	27462359	27463359
Chr1	27480011	27481011
Chr1	27524124	27525124
Chr1	27622862	27623862
Chr1	27625495	27626495
Chr1	27658967	27659967
Chr1	27672433	27673433
Chr1	27695250	27696250
Chr1	27706198	27707198
Chr1	27714595	27715595
Chr1	27755966	27756966
Chr1	27817961	27818961
Chr1	27849267	27850267
Chr1	27866514	27867514
Chr1	27884097	27885097
Chr1	27934672	27935672
Chr1	27943708	27944708
Chr1	27947784	27948784
Chr1	27949088	27950088
Chr1	27949488	27950488
Chr1	27950550	27951550
Chr1	27952842	27953842
Chr1	27954815	27955815
Chr1	27955370	27956370
Chr1	27955833	27956833
Chr1	27959036	27960036
Chr1	27959482	27960482
Chr1	27962685	27963685
Chr1	27963190	27964190
Chr1	27970079	27971079
Chr1	28025750	28026750
Chr1	28184425	28185425
Chr1	28185151	28186151
Chr1	28188275	28189275
Chr1	28203167	28204167
Chr1	28287823	28288823
Chr1	28455353	28456353
Chr1	28456047	28457047
Chr1	28462371	28463371
Chr1	28463023	28464023
Chr1	28496112	28497112
Chr1	28497660	28498660
Chr1	28503302	28504302
Chr1	28685842	28686842
Chr1	28836333	28837333
Chr1	28843803	28844803
Chr1	28906614	28907614
Chr1	29203429	29204429
Chr1	29208245	29209245
Chr1	29211830	29212830
Chr1	29360047	29361047
Chr1	29555499	29556499
Chr1	29558632	29559632
Chr1	29658396	29659396
Chr1	30176061	30177061
Chr1	30376173	30377173
Chr1	30501380	30502380
Chr1	30701375	30702375
Chr1	30724877	30725877
Chr1	31137677	31138677
Chr1	31173449	31174449
Chr1	31180617	31181617
Chr1	31183170	31184170
Chr1	31183919	31184919
Chr1	31186316	31187316
Chr1	31187741	31188741
Chr1	31192218	31193218
Chr1	31200357	31201357
Chr1	31203894	31204894
Chr1	31214305	31215305
Chr1	31216818	31217818
Chr1	31221327	31222327
Chr1	31227664	31228664
Chr1	31230868	31231868
Chr1	31231598	31232598
Chr1	31250815	31251815
Chr1	31252074	31253074
Chr1	31252975	31253975
Chr1	31263352	31264352
Chr1	31287035	31288035
Chr1	31318083	31319083
Chr1	31326652	31327652
Chr1	31344670	31345670
Chr1	31345276	31346276
Chr1	31351751	31352751
Chr1	31382020	31383020
Chr1	31383877	31384877
Chr1	31438439	31439439
Chr1	31625010	31626010
Chr1	31656503	31657503
Chr1	31884668	31885668
Chr1	31889634	31890634
Chr1	31932565	31933565
Chr1	31944086	31945086
Chr1	31952425	31953425
Chr1	31974149	31975149
Chr1	31988298	31989298
Chr1	31995600	31996600
Chr1	32014157	32015157
Chr1	32029389	32030389
Chr1	32050918	32051918
Chr1	32059207	32060207
Chr1	32075049	32076049
Chr1	32103443	32104443
Chr1	32129131	32130131
Chr1	32135151	32136151
Chr1	32224983	32225983
Chr1	32255704	32256704
Chr1	32420429	32421429
Chr1	32422894	32423894
Chr1	32444227	32445227
Chr1	32655398	32656398
Chr1	32693666	32694666
Chr1	32803870	32804870
Chr1	32812474	32813474
Chr1	32823987	32824987
Chr1	32861925	32862925
Chr1	33183393	33184393
Chr1	33190933	33191933
Chr1	33226742	33227742
Chr1	33337029	33338029
Chr1	33337928	33338928
Chr1	33341929	33342929
Chr1	33368099	33369099
Chr1	33432216	33433216
Chr1	33434928	33435928
Chr1	33448142	33449142
Chr1	33456179	33457179
Chr1	33458935	33459935
Chr1	33460633	33461633
Chr1	33511079	33512079
Chr1	33551423	33552423
Chr1	33560284	33561284
Chr1	33600907	33601907
Chr1	33647854	33648854
Chr1	33717046	33718046
Chr1	33900417	33901417
Chr1	33909158	33910158
Chr1	33925039	33926039
Chr1	33935881	33936881
Chr1	34083571	34084571
Chr1	35082061	35083061
Chr1	35207913	35208913
Chr1	35251742	35252742
Chr1	35667383	35668383
Chr1	35763827	35764827
Chr1	36023772	36024772
Chr1	36024741	36025741
Chr1	36029960	36030960
Chr1	36034215	36035215
Chr1	36043664	36044664
Chr1	36183079	36184079
Chr1	36192121	36193121
Chr1	36359953	36360953
Chr1	36553091	36554091
Chr1	36564908	36565908
Chr1	36572048	36573048
Chr1	36587440	36588440
Chr1	36598803	36599803
Chr1	36617195	36618195
Chr1	36623452	36624452
Chr1	36626807	36627807
Chr1	36638296	36639296
Chr1	36653501	36654501
Chr1	36766441	36767441
Chr1	36783450	36784450
Chr1	36811736	36812736
Chr1	36832957	36833957
Chr1	36834935	36835935
Chr1	36837615	36838615
Chr1	36870208	36871208
Chr1	36926025	36927025
Chr1	36944951	36945951
Chr1	36946420	36947420
Chr1	36978740	36979740
Chr1	36981625	36982625
Chr1	37019103	37020103
Chr1	37041232	37042232
Chr1	37115772	37116772
Chr1	37117861	37118861
Chr1	37169026	37170026
Chr1	37231659	37232659
Chr1	37263295	37264295
Chr1	37706649	37707649
Chr1	37899606	37900606
Chr1	37907882	37908882
Chr1	37943974	37944974
Chr1	37946072	37947072
Chr1	37949807	37950807
Chr1	37951278	37952278
Chr1	38026066	38027066
Chr1	38027086	38028086
Chr1	38073333	38074333
Chr1	38147664	38148664
Chr1	38180683	38181683
Chr1	38465909	38466909
Chr1	38469205	38470205
Chr1	38596795	38597795
Chr1	38914808	38915808
Chr1	39052372	39053372
Chr1	39066261	39067261
Chr1	39144194	39145194
Chr1	39325524	39326524
Chr1	39455760	39456760
Chr1	39557733	39558733
Chr1	39569632	39570632
Chr1	39656953	39657953
Chr1	39669674	39670674
Chr1	39723995	39724995
Chr1	39958125	39959125
Chr1	40004482	40005482
Chr1	40123413	40124413
Chr1	40160470	40161470
Chr1	40265149	40266149
Chr1	40281897	40282897
Chr1	40352102	40353102
Chr1	40364346	40365346
Chr1	40371175	40372175
Chr1	40384898	40385898
Chr1	40391068	40392068
Chr1	40423818	40424818
Chr1	40501996	40502996
Chr1	40609339	40610339
Chr1	40778764	40779764
Chr1	40887419	40888419
Chr1	40903779	40904779
Chr1	41104353	41105353
Chr1	41134197	41135197
Chr1	41269700	41270700
Chr1	41273916	41274916
Chr1	41278449	41279449
Chr1	41285402	41286402
Chr1	41313877	41314877
Chr1	41356094	41357094
Chr1	41362796	41363796
Chr1	41394544	41395544
Chr1	41414248	41415248
Chr1	41417836	41418836
Chr1	41524890	41525890
Chr1	41788211	41789211
Chr1	41806637	41807637
Chr1	41869568	41870568
Chr1	41882424	41883424
Chr1	41913501	41914501
Chr1	41989522	41990522
Chr1	42039429	42040429
Chr1	42105006	42106006
Chr1	42121445	42122445
Chr1	42139201	42140201
Chr1	42140773	42141773
Chr1	42146483	42147483
Chr1	42150618	42151618
Chr1	42168104	42169104
Chr1	42174697	42175697
Chr1	42190288	42191288
Chr1	42191685	42192685
Chr1	42193367	42194367
Chr1	42194070	42195070
Chr1	42205420	42206420
Chr1	42207628	42208628
Chr1	42208797	42209797
Chr1	42219154	42220154
Chr1	42230041	42231041
Chr1	42248525	42249525
Chr1	42271153	42272153
Chr1	42321070	42322070
Chr1	42328275	42329275
Chr1	42349560	42350560
Chr1	42363546	42364546
Chr1	42385324	42386324
Chr1	42612215	42613215
Chr1	43212488	43213488
Chr1	43222339	43223339
Chr1	43398064	43399064
Chr1	43428805	43429805
Chr1	43830710	43831710
Chr1	43880007	43881007
Chr1	43906886	43907886
Chr1	43919846	43920846
Chr1	43988509	43989509
Chr1	43994523	43995523
Chr1	44175812	44176812
Chr1	44325683	44326683
Chr1	44334183	44335183
Chr1	44400144	44401144
Chr1	44405305	44406305
Chr1	44460193	44461193
Chr1	44468018	44469018
Chr1	44471004	44472004
Chr1	44783579	44784579
Chr1	44786373	44787373
Chr1	44949717	44950717
Chr1	45020417	45021417
Chr1	45037431	45038431
Chr1	45060498	45061498
Chr1	45118202	45119202
Chr1	45175340	45176340
Chr1	45188474	45189474
Chr1	45266714	45267714
Chr1	45267489	45268489
Chr1	45268472	45269472
Chr1	45286057	45287057
Chr1	45301287	45302287
Chr1	45479047	45480047
Chr1	45765629	45766629
Chr1	45961401	45962401
Chr1	46035425	46036425
Chr1	46514579	46515579
Chr1	46648635	46649635
Chr1	46688896	46689896
Chr1	46807445	46808445
Chr1	46807887	46808887
Chr1	46907647	46908647
Chr1	46912243	46913243
Chr1	46945441	46946441
Chr1	46978941	46979941
Chr1	46993323	46994323
Chr1	47000393	47001393
Chr1	47006338	47007338
Chr1	47045907	47046907
Chr1	47079608	47080608
Chr1	47190592	47191592
Chr1	47640608	47641608
Chr1	47644494	47645494
Chr1	47691999	47692999
Chr1	48191619	48192619
Chr1	48336853	48337853
Chr1	48559025	48560025
Chr1	48582076	48583076
Chr1	48702207	48703207
Chr1	49142472	49143472
Chr1	49162461	49163461
Chr1	50799901	50800901
Chr1	50814029	50815029
Chr1	51765613	51766613
Chr1	51887338	51888338
Chr1	52392871	52393871
Chr1	52467650	52468650
Chr1	52761603	52762603
Chr1	53099564	53100564
Chr1	53141725	53142725
Chr1	53743566	53744566
Chr1	54061262	54062262
Chr1	54149652	54150652
Chr1	54152476	54153476
Chr1	54355712	54356712
Chr1	54414390	54415390
Chr1	54520701	54521701
Chr1	54626587	54627587
Chr1	54659743	54660743
Chr1	54660555	54661555
Chr1	54695255	54696255
Chr1	54704325	54705325
Chr1	54718876	54719876
Chr1	54837864	54838864
Chr1	54878644	54879644
Chr1	54930806	54931806
Chr1	54941455	54942455
Chr1	54952792	54953792
Chr1	54959973	54960973
Chr1	55257260	55258260
Chr1	55275837	55276837
Chr1	55410491	55411491
Chr1	55438498	55439498
Chr1	55439022	55440022
Chr1	55451503	55452503
Chr1	55573865	55574865
Chr1	55644542	55645542
Chr1	55698769	55699769
Chr1	55723412	55724412
Chr1	55742894	55743894
Chr1	55770577	55771577
Chr1	56041455	56042455
Chr1	56793903	56794903
Chr1	56874433	56875433
Chr1	56903379	56904379
Chr1	56914290	56915290
Chr1	56974407	56975407
Chr1	57029347	57030347
Chr1	57174658	57175658
Chr1	57297249	57298249
Chr1	57784394	57785394
Chr1	59050482	59051482
Chr1	59063717	59064717
Chr1	59115528	59116528
Chr1	59234595	59235595
Chr1	59245397	59246397
Chr1	59278283	59279283
Chr1	59306864	59307864
Chr1	59350032	59351032
Chr1	59364746	59365746
Chr1	59470079	59471079
Chr1	59470767	59471767
Chr1	59527177	59528177
Chr1	59691345	59692345
Chr1	59870179	59871179
Chr1	60136493	60137493
Chr1	60137081	60138081
Chr1	60138947	60139947
Chr1	60224850	60225850
Chr1	60412653	60413653
Chr1	61746669	61747669
Chr1	62054044	62055044
Chr1	62640945	62641945
Chr1	62799944	62800944
Chr1	62807731	62808731
Chr1	63306951	63307951
Chr1	64133973	64134973
Chr1	64254416	64255416
Chr1	64711719	64712719
Chr1	65362911	65363911
Chr1	65381258	65382258
Chr1	65400954	65401954
Chr1	65449470	65450470
Chr1	65805226	65806226
Chr1	66719810	66720810
Chr1	66737277	66738277
Chr1	66758276	66759276
Chr1	66837667	66838667
Chr1	66969241	66970241
Chr1	67028861	67029861
Chr1	67227714	67228714
Chr1	68118202	68119202
Chr1	68544187	68545187
Chr1	68585552	68586552
Chr1	69812706	69813706
Chr1	70818911	70819911
Chr1	73088585	73089585
Chr1	73952727	73953727
Chr1	75915637	75916637
Chr1	77373605	77374605
Chr1	77613581	77614581
Chr1	79196792	79197792
Chr1	83440098	83441098
Chr1	84294496	84295496
Chr1	85247853	85248853
Chr1	85320530	85321530
Chr1	85352936	85353936
Chr1	85354092	85355092
Chr1	85372887	85373887
Chr1	85410193	85411193
Chr1	85760946	85761946
Chr1	85986467	85987467
Chr1	89823543	89824543
Chr1	90081168	90082168
Chr1	90190828	90191828
Chr1	90227136	90228136
Chr1	90406017	90407017
Chr1	91630486	91631486
Chr1	91852464	91853464
Chr1	92756626	92757626
Chr1	93900699	93901699
Chr1	94148828	94149828
Chr1	94159361	94160361
Chr1	94203660	94204660
Chr1	94314366	94315366
Chr1	94504748	94505748
Chr1	94767708	94768708
Chr1	94979308	94980308
Chr1	95062958	95063958
Chr1	95145552	95146552
Chr1	95184996	95185996
Chr1	95187477	95188477
Chr1	95190829	95191829
Chr1	95210975	95211975
Chr1	95254691	95255691
Chr1	95271093	95272093
Chr1	95319624	95320624
Chr1	100501967	100502967
Chr1	100510482	100511482
Chr1	100928990	100929990
Chr1	101729955	101730955
Chr1	103571573	103572573
Chr1	108422279	108423279
Chr1	108532870	108533870
Chr1	108598894	108599894
Chr1	108656563	108657563
Chr1	108667688	108668688
Chr1	108683274	108684274
Chr1	108685294	108686294
Chr1	109054794	109055794
Chr1	109103238	109104238
Chr1	109233707	109234707
Chr1	109364737	109365737
Chr1	109370417	109371417
Chr1	109634614	109635614
Chr1	109743419	109744419
Chr1	109911040	109912040
Chr1	110023536	110024536
Chr1	110032910	110033910
Chr1	110075178	110076178
Chr1	110178694	110179694
Chr1	110182523	110183523
Chr1	110184965	110185965
Chr1	110311630	110312630
Chr1	110315976	110316976
Chr1	110318303	110319303
Chr1	110319182	110320182
Chr1	110334083	110335083
Chr1	110335211	110336211
Chr1	110361357	110362357
Chr1	110364181	110365181
Chr1	110435306	110436306
Chr1	110442786	110443786
Chr1	110447852	110448852
Chr1	110521876	110522876
Chr1	110596153	110597153
Chr1	110602402	110603402
Chr1	110605790	110606790
Chr1	110628972	110629972
Chr1	110630393	110631393
Chr1	110658750	110659750
Chr1	110662218	110663218
Chr1	110739204	110740204
Chr1	110743570	110744570
Chr1	110745292	110746292
Chr1	110750029	110751029
Chr1	110780109	110781109
Chr1	110797775	110798775
Chr1	110851446	110852446
Chr1	110969191	110970191
Chr1	111002554	111003554
Chr1	111038277	111039277
Chr1	111066756	111067756
Chr1	111158053	111159053
Chr1	111158891	111159891
Chr1	111173076	111174076
Chr1	111325585	111326585
Chr1	111372286	111373286
Chr1	111417644	111418644
Chr1	111454201	111455201
Chr1	111745501	111746501
Chr1	111765150	111766150
Chr1	112012537	112013537
Chr1	112058889	112059889
Chr1	112285243	112286243
Chr1	112289578	112290578
Chr1	112555201	112556201
Chr1	112911983	112912983
Chr1	112933121	112934121
Chr1	113013272	113014272
Chr1	113028885	113029885
Chr1	113242514	113243514
Chr1	113351499	113352499
Chr1	113423254	113424254
Chr1	113587422	113588422
Chr1	114214392	114215392
Chr1	114450943	114451943
Chr1	114459949	114460949
Chr1	114460609	114461609
Chr1	114576934	114577934
Chr1	114624853	114625853
Chr1	114652334	114653334
Chr1	114655281	114656281
Chr1	114664234	114665234
Chr1	115521610	115522610
Chr1	115618864	115619864
Chr1	115655084	115656084
Chr1	115717893	115718893
Chr1	116259838	116260838
Chr1	116306869	116307869
Chr1	116695056	116696056
Chr1	117032494	117033494
Chr1	117041335	117042335
Chr1	117051693	117052693
Chr1	117114761	117115761
Chr1	117127138	117128138
Chr1	117133630	117134630
Chr1	117147652	117148652
Chr1	117208455	117209455
Chr1	117477220	117478220
Chr1	118215703	118216703
Chr1	118437830	118438830
Chr1	118693662	118694662
Chr1	120147384	120148384
Chr1	120153932	120154932
Chr1	120286402	120287402
Chr1	120351277	120352277
Chr1	120428516	120429516
Chr1	120510419	120511419
Chr1	120623518	120624518
Chr1	120658709	120659709
Chr1	120931654	120932654
Chr1	142838436	142839436
Chr1	143279903	143280903
Chr1	143283133	143284133
Chr1	143535444	143536444
Chr1	143535924	143536924
Chr1	143539716	143540716
Chr1	144004826	144005826
Chr1	144007565	144008565
Chr1	144013301	144014301
Chr1	144015511	144016511
Chr1	144066757	144067757
Chr1	144537324	144538324
Chr1	144572103	144573103
Chr1	144859364	144860364
Chr1	144878463	144879463
Chr1	144880437	144881437
Chr1	144883815	144884815
Chr1	144892010	144893010
Chr1	144930491	144931491
Chr1	144943355	144944355
Chr1	144992074	144993074
Chr1	144992685	144993685
Chr1	144993831	144994831
Chr1	144995031	144996031
Chr1	145014259	145015259
Chr1	145021955	145022955
Chr1	145026079	145027079
Chr1	145056917	145057917
Chr1	145061555	145062555
Chr1	145067027	145068027
Chr1	145067992	145068992
Chr1	145081335	145082335
Chr1	145082253	145083253
Chr1	145084292	145085292
Chr1	145109155	145110155
Chr1	145160353	145161353
Chr1	145213761	145214761
Chr1	145291574	145292574
Chr1	145303638	145304638
Chr1	145446579	145447579
Chr1	145451291	145452291
Chr1	145456674	145457674
Chr1	145514934	145515934
Chr1	145524378	145525378
Chr1	145542486	145543486
Chr1	146008364	146009364
Chr1	147098983	147099983
Chr1	147112266	147113266
Chr1	147171751	147172751
Chr1	147362019	147363019
Chr1	147706208	147707208
Chr1	147726818	147727818
Chr1	147805582	147806582
Chr1	148531427	148532427
Chr1	148551275	148552275
Chr1	148929751	148930751
Chr1	148950901	148951901
Chr1	149203958	149204958
Chr1	149208476	149209476
Chr1	149430733	149431733
Chr1	149908786	149909786
Chr1	150134081	150135081
Chr1	150137825	150138825
Chr1	150140847	150141847
Chr1	150436516	150437516
Chr1	150479988	150480988
Chr1	150527837	150528837
Chr1	150532075	150533075
Chr1	150535519	150536519
Chr1	150557801	150558801
Chr1	150669263	150670263
Chr1	150737002	150738002
Chr1	150768569	150769569
Chr1	150785262	150786262
Chr1	150968058	150969058
Chr1	150979750	150980750
Chr1	150996702	150997702
Chr1	151119893	151120893
Chr1	151139373	151140373
Chr1	151246130	151247130
Chr1	151255864	151256864
Chr1	151283076	151284076
Chr1	151313071	151314071
Chr1	151320011	151321011
Chr1	151338830	151339830
Chr1	151506837	151507837
Chr1	151678554	151679554
Chr1	151806390	151807390
Chr1	151916878	151917878
Chr1	151922177	151923177
Chr1	151960665	151961665
Chr1	151967164	151968164
Chr1	151973764	151974764
Chr1	151985827	151986827
Chr1	151986298	151987298
Chr1	152140021	152141021
Chr1	152156483	152157483
Chr1	152157753	152158753
Chr1	152423472	152424472
Chr1	152505504	152506504
Chr1	153250054	153251054
Chr1	153276745	153277745
Chr1	153319950	153320950
Chr1	153320567	153321567
Chr1	153335541	153336541
Chr1	153336288	153337288
Chr1	153339300	153340300
Chr1	153343497	153344497
Chr1	153360952	153361952
Chr1	153365116	153366116
Chr1	153368520	153369520
Chr1	153374176	153375176
Chr1	153446468	153447468
Chr1	153467073	153468073
Chr1	153481921	153482921
Chr1	153482881	153483881
Chr1	153506885	153507885
Chr1	153521406	153522406
Chr1	153540657	153541657
Chr1	153549375	153550375
Chr1	153580906	153581906
Chr1	153582459	153583459
Chr1	153589727	153590727
Chr1	153599352	153600352
Chr1	153649891	153650891
Chr1	153659079	153660079
Chr1	153671227	153672227
Chr1	153730430	153731430
Chr1	153744109	153745109
Chr1	153761952	153762952
Chr1	153762514	153763514
Chr1	153765046	153766046
Chr1	153815488	153816488
Chr1	153916690	153917690
Chr1	153928239	153929239
Chr1	153932717	153933717
Chr1	153963358	153964358
Chr1	154245884	154246884
Chr1	154296740	154297740
Chr1	154298306	154299306
Chr1	154299771	154300771
Chr1	154317402	154318402
Chr1	154318549	154319549
Chr1	154326570	154327570
Chr1	154376662	154377662
Chr1	154378985	154379985
Chr1	154391219	154392219
Chr1	154393102	154394102
Chr1	154518592	154519592
Chr1	154573965	154574965
Chr1	154706415	154707415
Chr1	154721196	154722196
Chr1	154744819	154745819
Chr1	154782710	154783710
Chr1	154839898	154840898
Chr1	154842117	154843117
Chr1	154850654	154851654
Chr1	154926103	154927103
Chr1	154927310	154928310
Chr1	154960273	154961273
Chr1	154961918	154962918
Chr1	154978851	154979851
Chr1	154985517	154986517
Chr1	154994994	154995994
Chr1	155002791	155003791
Chr1	155017037	155018037
Chr1	155047287	155048287
Chr1	155056263	155057263
Chr1	155066545	155067545
Chr1	155105614	155106614
Chr1	155140899	155141899
Chr1	155146223	155147223
Chr1	155176342	155177342
Chr1	155176967	155177967
Chr1	155177381	155178381
Chr1	155209957	155210957
Chr1	155922043	155923043
Chr1	155939099	155940099
Chr1	155941419	155942419
Chr1	155958541	155959541
Chr1	155971224	155972224
Chr1	155972107	155973107
Chr1	155995369	155996369
Chr1	156041208	156042208
Chr1	156059168	156060168
Chr1	156060188	156061188
Chr1	156066255	156067255
Chr1	156072970	156073970
Chr1	156073532	156074532
Chr1	156076351	156077351
Chr1	156092501	156093501
Chr1	156092981	156093981
Chr1	156098001	156099001
Chr1	156099609	156100609
Chr1	156118647	156119647
Chr1	156125043	156126043
Chr1	156161143	156162143
Chr1	156163873	156164873
Chr1	156165920	156166920
Chr1	156210212	156211212
Chr1	156326418	156327418
Chr1	156341043	156342043
Chr1	156341580	156342580
Chr1	156346557	156347557
Chr1	156356588	156357588
Chr1	156403075	156404075
Chr1	156431264	156432264
Chr1	156450220	156451220
Chr1	156458472	156459472
Chr1	156475360	156476360
Chr1	156478887	156479887
Chr1	156548899	156549899
Chr1	156572185	156573185
Chr1	156578579	156579579
Chr1	156581888	156582888
Chr1	156630821	156631821
Chr1	156660333	156661333
Chr1	156717178	156718178
Chr1	156718854	156719854
Chr1	156735760	156736760
Chr1	156775384	156776384
Chr1	156784285	156785285
Chr1	156846949	156847949
Chr1	156875121	156876121
Chr1	156955763	156956763
Chr1	156963247	156964247
Chr1	157059582	157060582
Chr1	157076413	157077413
Chr1	157078881	157079881
Chr1	157080147	157081147
Chr1	157080841	157081841
Chr1	157083061	157084061
Chr1	157106706	157107706
Chr1	157123514	157124514
Chr1	157140251	157141251
Chr1	157460046	157461046
Chr1	157660766	157661766
Chr1	157835359	157836359
Chr1	157918030	157919030
Chr1	157931288	157932288
Chr1	157931805	157932805
Chr1	157961407	157962407
Chr1	158056828	158057828
Chr1	158065236	158066236
Chr1	158087242	158088242
Chr1	158094463	158095463
Chr1	158173228	158174228
Chr1	158475841	158476841
Chr1	158805689	158806689
Chr1	158970133	158971133
Chr1	159041452	159042452
Chr1	159049030	159050030
Chr1	159180992	159181992
Chr1	159398736	159399736
Chr1	159851382	159852382
Chr1	159881200	159882200
Chr1	159883673	159884673
Chr1	159900360	159901360
Chr1	159903021	159904021
Chr1	159905866	159906866
Chr1	159921037	159922037
Chr1	159923061	159924061
Chr1	160038634	160039634
Chr1	160048145	160049145
Chr1	160055648	160056648
Chr1	160078303	160079303
Chr1	160081970	160082970
Chr1	160140660	160141660
Chr1	160345400	160346400
Chr1	160346009	160347009
Chr1	160386736	160387736
Chr1	160517684	160518684
Chr1	160519945	160520945
Chr1	160616528	160617528
Chr1	160650951	160651951
Chr1	160651936	160652936
Chr1	160654162	160655162
Chr1	160682676	160683676
Chr1	160708478	160709478
Chr1	160711294	160712294
Chr1	160712731	160713731
Chr1	160717741	160718741
Chr1	160737124	160738124
Chr1	160746967	160747967
Chr1	160751073	160752073
Chr1	160800033	160801033
Chr1	160804434	160805434
Chr1	160831314	160832314
Chr1	160834826	160835826
Chr1	160920858	160921858
Chr1	161010909	161011909
Chr1	161016123	161017123
Chr1	161017938	161018938
Chr1	161058062	161059062
Chr1	161062207	161063207
Chr1	161066701	161067701
Chr1	161134325	161135325
Chr1	161150139	161151139
Chr1	161153555	161154555
Chr1	161161958	161162958
Chr1	161169771	161170771
Chr1	161211144	161212144
Chr1	161461892	161462892
Chr1	161468179	161469179
Chr1	161690632	161691632
Chr1	161958644	161959644
Chr1	161972590	161973590
Chr1	162043757	162044757
Chr1	162204150	162205150
Chr1	162260416	162261416
Chr1	162271856	162272856
Chr1	162817322	162818322
Chr1	164681470	164682470
Chr1	164756245	164757245
Chr1	165338202	165339202
Chr1	165811002	165812002
Chr1	165844166	165845166
Chr1	167092985	167093985
Chr1	167412816	167413816
Chr1	167502737	167503737
Chr1	167517853	167518853
Chr1	167520318	167521318
Chr1	167534917	167535917
Chr1	167600553	167601553
Chr1	167630511	167631511
Chr1	167642171	167643171
Chr1	167652082	167653082
Chr1	167772916	167773916
Chr1	167803281	167804281
Chr1	168052723	168053723
Chr1	168475374	168476374
Chr1	168479449	168480449
Chr1	169016214	169017214
Chr1	169555246	169556246
Chr1	169670488	169671488
Chr1	171613768	171614768
Chr1	171624316	171625316
Chr1	171705815	171706815
Chr1	171762903	171763903
Chr1	171770243	171771243
Chr1	172468418	172469418
Chr1	172623389	172624389
Chr1	172667973	172668973
Chr1	172686527	172687527
Chr1	172688468	172689468
Chr1	173019659	173020659
Chr1	173174173	173175173
Chr1	174226903	174227903
Chr1	174738803	174739803
Chr1	174922587	174923587
Chr1	175041255	175042255
Chr1	175120844	175121844
Chr1	175287454	175288454
Chr1	175288445	175289445
Chr1	175628131	175629131
Chr1	176113343	176114343
Chr1	176628875	176629875
Chr1	177002332	177003332
Chr1	177918532	177919532
Chr1	178023941	178024941
Chr1	178470560	178471560
Chr1	178501126	178502126
Chr1	178971528	178972528
Chr1	178976543	178977543
Chr1	179778645	179779645
Chr1	179836558	179837558
Chr1	180092299	180093299
Chr1	180099595	180100595
Chr1	180100819	180101819
Chr1	180147645	180148645
Chr1	180221441	180222441
Chr1	180250314	180251314
Chr1	180963100	180964100
Chr1	181104143	181105143
Chr1	181117810	181118810
Chr1	181393723	181394723
Chr1	181447963	181448963
Chr1	182030097	182031097
Chr1	182037785	182038785
Chr1	182049825	182050825
Chr1	182054299	182055299
Chr1	182111970	182112970
Chr1	182117702	182118702
Chr1	182166825	182167825
Chr1	182365513	182366513
Chr1	182555226	182556226
Chr1	183287263	183288263
Chr1	183337539	183338539
Chr1	183512424	183513424
Chr1	183558688	183559688
Chr1	183578963	183579963
Chr1	183883099	183884099
Chr1	183935473	183936473
Chr1	183958019	183959019
Chr1	184086868	184087868
Chr1	184119537	184120537
Chr1	184120536	184121536
Chr1	184121852	184122852
Chr1	184122316	184123316
Chr1	184388653	184389653
Chr1	184757625	184758625
Chr1	185564891	185565891
Chr1	186574578	186575578
Chr1	186651565	186652565
Chr1	190353715	190354715
Chr1	192758708	192759708
Chr1	192848157	192849157
Chr1	193031921	193032921
Chr1	193084513	193085513
Chr1	193375624	193376624
Chr1	194239772	194240772
Chr1	197806688	197807688
Chr1	197837734	197838734
Chr1	197945192	197946192
Chr1	198631658	198632658
Chr1	198645140	198646140
Chr1	198654917	198655917
Chr1	198903700	198904700
Chr1	198906164	198907164
Chr1	199010342	199011342
Chr1	199724932	199725932
Chr1	199834786	199835786
Chr1	200108495	200109495
Chr1	200122135	200123135
Chr1	200195535	200196535
Chr1	200225782	200226782
Chr1	200241807	200242807
Chr1	200318381	200319381
Chr1	200457482	200458482
Chr1	200736168	200737168
Chr1	200846958	200847958
Chr1	200867089	200868089
Chr1	200985008	200986008
Chr1	201010209	201011209
Chr1	201054722	201055722
Chr1	201153733	201154733
Chr1	201191693	201192693
Chr1	201223352	201224352
Chr1	201315402	201316402
Chr1	201377048	201378048
Chr1	201404554	201405554
Chr1	201422922	201423922
Chr1	201425212	201426212
Chr1	201438552	201439552
Chr1	201445392	201446392
Chr1	201457805	201458805
Chr1	201481786	201482786
Chr1	201499588	201500588
Chr1	201512634	201513634
Chr1	201513075	201514075
Chr1	201514964	201515964
Chr1	201525640	201526640
Chr1	201672977	201673977
Chr1	201678273	201679273
Chr1	201680710	201681710
Chr1	201681289	201682289
Chr1	201685209	201686209
Chr1	201864720	201865720
Chr1	201918534	201919534
Chr1	201978355	201979355
Chr1	202015436	202016436
Chr1	202054173	202055173
Chr1	202114257	202115257
Chr1	202124169	202125169
Chr1	202128134	202129134
Chr1	202128753	202129753
Chr1	202131735	202132735
Chr1	202153473	202154473
Chr1	202161617	202162617
Chr1	202218162	202219162
Chr1	202264398	202265398
Chr1	202568979	202569979
Chr1	202625069	202626069
Chr1	202629948	202630948
Chr1	202661829	202662829
Chr1	202902414	202903414
Chr1	203008158	203009158
Chr1	203027310	203028310
Chr1	203086627	203087627
Chr1	203107139	203108139
Chr1	203136146	203137146
Chr1	203140983	203141983
Chr1	203166439	203167439
Chr1	203244436	203245436
Chr1	203246934	203247934
Chr1	203249861	203250861
Chr1	203251172	203252172
Chr1	203253493	203254493
Chr1	203254988	203255988
Chr1	203257043	203258043
Chr1	203289359	203290359
Chr1	203297467	203298467
Chr1	203320122	203321122
Chr1	203377327	203378327
Chr1	203379444	203380444
Chr1	203394448	203395448
Chr1	203473444	203474444
Chr1	203559402	203560402
Chr1	203670920	203671920
Chr1	203740581	203741581
Chr1	203857727	203858727
Chr1	204097821	204098821
Chr1	204099031	204100031
Chr1	204131315	204132315
Chr1	204158077	204159077
Chr1	204175869	204176869
Chr1	204188589	204189589
Chr1	204224169	204225169
Chr1	204256428	204257428
Chr1	204393602	204394602
Chr1	204394808	204395808
Chr1	204396699	204397699
Chr1	204414646	204415646
Chr1	204415180	204416180
Chr1	204417361	204418361
Chr1	204421945	204422945
Chr1	204760564	204761564
Chr1	204910541	204911541
Chr1	204944455	204945455
Chr1	204958100	204959100
Chr1	204960255	204961255
Chr1	205043832	205044832
Chr1	205201919	205202919
Chr1	205280413	205281413
Chr1	205287047	205288047
Chr1	205293680	205294680
Chr1	205304411	205305411
Chr1	205323101	205324101
Chr1	205323807	205324807
Chr1	205365848	205366848
Chr1	205451792	205452792
Chr1	205493152	205494152
Chr1	205510151	205511151
Chr1	205510626	205511626
Chr1	205626331	205627331
Chr1	205637116	205638116
Chr1	205650602	205651602
Chr1	205760411	205761411
Chr1	205774502	205775502
Chr1	205887828	205888828
Chr1	205899828	205900828
Chr1	206238987	206239987
Chr1	206243182	206244182
Chr1	206308267	206309267
Chr1	206326893	206327893
Chr1	206529403	206530403
Chr1	206534951	206535951
Chr1	206634857	206635857
Chr1	206639845	206640845
Chr1	206641629	206642629
Chr1	206652533	206653533
Chr1	206654188	206655188
Chr1	206663106	206664106
Chr1	206664350	206665350
Chr1	206684163	206685163
Chr1	206717806	206718806
Chr1	206729086	206730086
Chr1	206750555	206751555
Chr1	206752220	206753220
Chr1	206753654	206754654
Chr1	206755181	206756181
Chr1	206756012	206757012
Chr1	206756424	206757424
Chr1	206806798	206807798
Chr1	206836048	206837048
Chr1	206836862	206837862
Chr1	206861069	206862069
Chr1	206878004	206879004
Chr1	206879516	206880516
Chr1	206898585	206899585
Chr1	206899344	206900344
Chr1	206903436	206904436
Chr1	206907591	206908591
Chr1	206908769	206909769
Chr1	206910851	206911851
Chr1	206917717	206918717
Chr1	206918397	206919397
Chr1	206943175	206944175
Chr1	206960913	206961913
Chr1	206970810	206971810
Chr1	206974573	206975573
Chr1	207004776	207005776
Chr1	207006921	207007921
Chr1	207030113	207031113
Chr1	207037964	207038964
Chr1	207043419	207044419
Chr1	207055558	207056558
Chr1	207063074	207064074
Chr1	207064433	207065433
Chr1	207078372	207079372
Chr1	207085522	207086522
Chr1	207096121	207097121
Chr1	207106347	207107347
Chr1	207129078	207130078
Chr1	207155155	207156155
Chr1	207178013	207179013
Chr1	207375535	207376535
Chr1	207538101	207539101
Chr1	207982237	207983237
Chr1	207984919	207985919
Chr1	207995703	207996703
Chr1	207998369	207999369
Chr1	208033595	208034595
Chr1	208039798	208040798
Chr1	208040497	208041497
Chr1	208058102	208059102
Chr1	208061814	208062814
Chr1	208170808	208171808
Chr1	208358757	208359757
Chr1	209539899	209540899
Chr1	209608730	209609730
Chr1	209739114	209740114
Chr1	209795221	209796221
Chr1	209819588	209820588
Chr1	209826127	209827127
Chr1	209828430	209829430
Chr1	209828833	209829833
Chr1	209831729	209832729
Chr1	209843975	209844975
Chr1	209845722	209846722
Chr1	209896963	209897963
Chr1	209930236	209931236
Chr1	209996122	209997122
Chr1	210573608	210574608
Chr1	210580253	210581253
Chr1	211514172	211515172
Chr1	211643074	211644074
Chr1	211686982	211687982
Chr1	211794491	211795491
Chr1	211822633	211823633
Chr1	211853724	211854724
Chr1	212428008	212429008
Chr1	212541002	212542002
Chr1	212575944	212576944
Chr1	212585374	212586374
Chr1	212628883	212629883
Chr1	212630111	212631111
Chr1	212650159	212651159
Chr1	212659578	212660578
Chr1	212660940	212661940
Chr1	212668751	212669751
Chr1	212685693	212686693
Chr1	212686312	212687312
Chr1	212733953	212734953
Chr1	212738072	212739072
Chr1	212738695	212739695
Chr1	212778066	212779066
Chr1	212783651	212784651
Chr1	212791885	212792885
Chr1	212857070	212858070
Chr1	212859048	212860048
Chr1	212891498	212892498
Chr1	213579996	213580996
Chr1	213625893	213626893
Chr1	214504850	214505850
Chr1	217339933	217340933
Chr1	218632970	218633970
Chr1	218669585	218670585
Chr1	218694628	218695628
Chr1	219018646	219019646
Chr1	219262962	219263962
Chr1	219303596	219304596
Chr1	219615612	219616612
Chr1	219632430	219633430
Chr1	219635014	219636014
Chr1	219967156	219968156
Chr1	220494850	220495850
Chr1	220637429	220638429
Chr1	220853113	220854113
Chr1	220976687	220977687
Chr1	221047216	221048216
Chr1	221163478	221164478
Chr1	221651075	221652075
Chr1	221811645	221812645
Chr1	221879034	221880034
Chr1	221981977	221982977
Chr1	221984346	221985346
Chr1	221997170	221998170
Chr1	222009293	222010293
Chr1	222060101	222061101
Chr1	222269165	222270165
Chr1	222637831	222638831
Chr1	222807498	222808498
Chr1	223255601	223256601
Chr1	223263084	223264084
Chr1	223348069	223349069
Chr1	223352878	223353878
Chr1	223363014	223364014
Chr1	223417410	223418410
Chr1	223815578	223816578
Chr1	223883777	223884777
Chr1	223890376	223891376
Chr1	223900834	223901834
Chr1	223904845	223905845
Chr1	223909329	223910329
Chr1	223912150	223913150
Chr1	223913406	223914406
Chr1	223963398	223964398
Chr1	224026393	224027393
Chr1	224101094	224102094
Chr1	224303537	224304537
Chr1	224705943	224706943
Chr1	224831952	224832952
Chr1	224857300	224858300
Chr1	224939814	224940814
Chr1	225959692	225960692
Chr1	226047295	226048295
Chr1	226065043	226066043
Chr1	226066676	226067676
Chr1	226149776	226150776
Chr1	226174882	226175882
Chr1	226217026	226218026
Chr1	226223093	226224093
Chr1	226229295	226230295
Chr1	226305767	226306767
Chr1	226312561	226313561
Chr1	226670587	226671587
Chr1	226684274	226685274
Chr1	226796106	226797106
Chr1	226813012	226814012
Chr1	226813873	226814873
Chr1	226821473	226822473
Chr1	226848619	226849619
Chr1	226849377	226850377
Chr1	226866561	226867561
Chr1	226870450	226871450
Chr1	226938226	226939226
Chr1	226966955	226967955
Chr1	226991739	226992739
Chr1	227067475	227068475
Chr1	227636479	227637479
Chr1	227916664	227917664
Chr1	227976614	227977614
Chr1	227977496	227978496
Chr1	228219442	228220442
Chr1	228263253	228264253
Chr1	228293903	228294903
Chr1	228297250	228298250
Chr1	228343607	228344607
Chr1	228355941	228356941
Chr1	228360853	228361853
Chr1	228367675	228368675
Chr1	228605705	228606705
Chr1	228659190	228660190
Chr1	228702632	228703632
Chr1	228962228	228963228
Chr1	228977544	228978544
Chr1	229120172	229121172
Chr1	229130409	229131409
Chr1	229158388	229159388
Chr1	229160970	229161970
Chr1	229200529	229201529
Chr1	229205282	229206282
Chr1	229290315	229291315
Chr1	229304915	229305915
Chr1	229326446	229327446
Chr1	229326966	229327966
Chr1	229331796	229332796
Chr1	229393451	229394451
Chr1	230098205	230099205
Chr1	230142234	230143234
Chr1	230199697	230200697
Chr1	230242472	230243472
Chr1	230256280	230257280
Chr1	230295169	230296169
Chr1	230423867	230424867
Chr1	230445990	230446990
Chr1	230463421	230464421
Chr1	230683640	230684640
Chr1	230706356	230707356
Chr1	231227401	231228401
Chr1	231346736	231347736
Chr1	231495088	231496088
Chr1	231685818	231686818
Chr1	231739430	231740430
Chr1	231747320	231748320
Chr1	231761489	231762489
Chr1	231763902	231764902
Chr1	231860471	231861471
Chr1	231885586	231886586
Chr1	231896689	231897689
Chr1	232027648	232028648
Chr1	232779368	232780368
Chr1	232829448	232830448
Chr1	232861448	232862448
Chr1	233088353	233089353
Chr1	233317977	233318977
Chr1	233338985	233339985
Chr1	234446473	234447473
Chr1	234458435	234459435
Chr1	234622932	234623932
Chr1	234634535	234635535
Chr1	234649546	234650546
Chr1	234673562	234674562
Chr1	234679545	234680545
Chr1	234749437	234750437
Chr1	234760145	234761145
Chr1	234811687	234812687
Chr1	234855043	234856043
Chr1	234890393	234891393
Chr1	234891780	234892780
Chr1	234895045	234896045
Chr1	234914215	234915215
Chr1	234916494	234917494
Chr1	234918204	234919204
Chr1	234974861	234975861
Chr1	234976088	234977088
Chr1	234987470	234988470
Chr1	234998285	234999285
Chr1	235000829	235001829
Chr1	235022037	235023037
Chr1	235025025	235026025
Chr1	235056619	235057619
Chr1	235057817	235058817
Chr1	235063342	235064342
Chr1	235080391	235081391
Chr1	235095174	235096174
Chr1	235117240	235118240
Chr1	235118770	235119770
Chr1	235144211	235145211
Chr1	235146497	235147497
Chr1	235187823	235188823
Chr1	235242058	235243058
Chr1	235678859	235679859
Chr1	236038100	236039100
Chr1	236046260	236047260
Chr1	236061079	236062079
Chr1	236064478	236065478
Chr1	236071780	236072780
Chr1	236073344	236074344
Chr1	236091193	236092193
Chr1	236102566	236103566
Chr1	236114684	236115684
Chr1	236204807	236205807
Chr1	236255826	236256826
Chr1	236263265	236264265
Chr1	236266615	236267615
Chr1	236272329	236273329
Chr1	236419234	236420234
Chr1	236557265	236558265
Chr1	236614988	236615988
Chr1	236635511	236636511
Chr1	237766072	237767072
Chr1	238415308	238416308
Chr1	238427933	238428933
Chr1	239955083	239956083
Chr1	239977199	239978199
Chr1	240024369	240025369
Chr1	240787987	240788987
Chr1	241638634	241639634
Chr1	241763494	241764494
Chr1	243610981	243611981
Chr1	244080965	244081965
Chr1	244173204	244174204
Chr1	244246463	244247463
Chr1	244386137	244387137
Chr1	244467625	244468625
Chr1	244468089	244469089
Chr1	244487459	244488459
Chr1	245100115	245101115
Chr1	246166134	246167134
Chr1	246175230	246176230
Chr1	246234973	246235973
Chr1	246655639	246656639
Chr1	246660322	246661322
Chr1	246852512	246853512
Chr1	246858655	246859655
Chr1	246948487	246949487
Chr1	246957298	246958298
Chr1	247248188	247249188
Chr1	247579494	247580494
Chr1	247580028	247581028
Chr1	247584042	247585042
Chr1	247588433	247589433
Chr1	247590928	247591928
Chr1	247594258	247595258
Chr1	247595501	247596501
Chr1	247602213	247603213
Chr1	247606541	247607541
Chr1	247607140	247608140
Chr1	247607638	247608638
Chr1	247609852	247610852
Chr1	247610291	247611291
Chr1	247612246	247613246
Chr1	247613094	247614094
Chr1	247613752	247614752
Chr1	247615078	247616078
Chr1	247615515	247616515
Chr1	247617149	247618149
Chr1	247620192	247621192
Chr1	247622489	247623489
Chr1	247638912	247639912
Chr1	247711750	247712750
Chr1	247844289	247845289
Chr1	248644395	248645395
Chr1	248792589	248793589
Chr1	249101012	249102012
Chr1	249156561	249157561
Chr1	249218552	249219552
Chr1	249219058	249220058
Chr10	194098	195098
Chr10	405646	406646
Chr10	515143	516143
Chr10	725167	726167
Chr10	789255	790255
Chr10	999988	1000988
Chr10	1231619	1232619
Chr10	1280943	1281943
Chr10	1534553	1535553
Chr10	1593532	1594532
Chr10	1602439	1603439
Chr10	1626406	1627406
Chr10	1711092	1712092
Chr10	2243379	2244379
Chr10	2448780	2449780
Chr10	2880998	2881998
Chr10	2909857	2910857
Chr10	2959252	2960252
Chr10	2992868	2993868
Chr10	3027591	3028591
Chr10	3085438	3086438
Chr10	3133880	3134880
Chr10	3151319	3152319
Chr10	3237328	3238328
Chr10	3239244	3240244
Chr10	3493146	3494146
Chr10	3528253	3529253
Chr10	3582044	3583044
Chr10	3634252	3635252
Chr10	3680299	3681299
Chr10	3719995	3720995
Chr10	3739387	3740387
Chr10	3758110	3759110
Chr10	3764891	3765891
Chr10	3797419	3798419
Chr10	3799843	3800843
Chr10	3805755	3806755
Chr10	3806966	3807966
Chr10	3816265	3817265
Chr10	3836964	3837964
Chr10	3871234	3872234
Chr10	3876327	3877327
Chr10	3880475	3881475
Chr10	3896884	3897884
Chr10	3899932	3900932
Chr10	3914792	3915792
Chr10	3924735	3925735
Chr10	3931966	3932966
Chr10	3935677	3936677
Chr10	4059839	4060839
Chr10	4069867	4070867
Chr10	4077195	4078195
Chr10	4183354	4184354
Chr10	4235588	4236588
Chr10	4295998	4296998
Chr10	4299973	4300973
Chr10	4362661	4363661
Chr10	4394011	4395011
Chr10	4452159	4453159
Chr10	4554713	4555713
Chr10	4579271	4580271
Chr10	4749819	4750819
Chr10	4750286	4751286
Chr10	4813132	4814132
[truncated: 70,388 more rows]

## Sheet: enhancers in monocyte
Chromosome	start	end
Chr1	96091	97091
Chr1	249822	250822
Chr1	569388	570388
Chr1	713627	714627
Chr1	752212	753212
Chr1	762024	763024
Chr1	762619	763619
Chr1	858736	859736
Chr1	894223	895223
Chr1	901056	902056
Chr1	901803	902803
Chr1	935015	936015
Chr1	935448	936448
Chr1	936212	937212
Chr1	936870	937870
Chr1	948272	949272
Chr1	956131	957131
Chr1	956909	957909
Chr1	971054	972054
Chr1	999040	1000040
Chr1	1000853	1001853
Chr1	1004227	1005227
Chr1	1004995	1005995
Chr1	1005604	1006604
Chr1	1039223	1040223
Chr1	1092461	1093461
Chr1	1093341	1094341
Chr1	1124172	1125172
Chr1	1147843	1148843
Chr1	1148433	1149433
Chr1	1148978	1149978
Chr1	1166999	1167999
Chr1	1195069	1196069
Chr1	1208263	1209263
Chr1	1208798	1209798
Chr1	1209207	1210207
Chr1	1209621	1210621
Chr1	1210100	1211100
Chr1	1239743	1240743
Chr1	1240264	1241264
Chr1	1242245	1243245
Chr1	1243211	1244211
Chr1	1243842	1244842
Chr1	1244407	1245407
Chr1	1246978	1247978
Chr1	1259294	1260294
Chr1	1260005	1261005
Chr1	1283267	1284267
Chr1	1283860	1284860
Chr1	1306420	1307420
Chr1	1310263	1311263
Chr1	1311032	1312032
Chr1	1333210	1334210
Chr1	1334325	1335325
Chr1	1334807	1335807
Chr1	1341023	1342023
Chr1	1342152	1343152
Chr1	1406592	1407592
Chr1	1439731	1440731
Chr1	1440335	1441335
Chr1	1446825	1447825
Chr1	1508861	1509861
Chr1	1509695	1510695
Chr1	1510208	1511208
Chr1	1532703	1533703
Chr1	1542169	1543169
Chr1	1550912	1551912
Chr1	1551627	1552627
Chr1	1590066	1591066
Chr1	1596557	1597557
Chr1	1617393	1618393
Chr1	1623341	1624341
Chr1	1623752	1624752
Chr1	1655360	1656360
Chr1	1672094	1673094
Chr1	1677100	1678100
Chr1	1695410	1696410
Chr1	1696182	1697182
Chr1	1709425	1710425
Chr1	1709993	1710993
Chr1	1710527	1711527
Chr1	1711318	1712318
Chr1	1713371	1714371
Chr1	1713913	1714913
Chr1	1772666	1773666
Chr1	1780338	1781338
Chr1	1788186	1789186
Chr1	1789745	1790745
Chr1	1792082	1793082
Chr1	1796955	1797955
Chr1	1821150	1822150
Chr1	1822607	1823607
Chr1	1837067	1838067
Chr1	1839723	1840723
Chr1	1840771	1841771
Chr1	1850032	1851032
Chr1	1850939	1851939
Chr1	1851462	1852462
Chr1	1852823	1853823
Chr1	1927316	1928316
Chr1	1975972	1976972
Chr1	1977617	1978617
Chr1	2043567	2044567
Chr1	2058254	2059254
Chr1	2063328	2064328
Chr1	2064320	2065320
Chr1	2064805	2065805
Chr1	2073785	2074785
Chr1	2079876	2080876
Chr1	2082229	2083229
Chr1	2083051	2084051
Chr1	2090267	2091267
Chr1	2111361	2112361
Chr1	2120558	2121558
Chr1	2126151	2127151
Chr1	2130341	2131341
Chr1	2135314	2136314
Chr1	2136082	2137082
Chr1	2143781	2144781
Chr1	2155296	2156296
Chr1	2160235	2161235
Chr1	2162316	2163316
Chr1	2163046	2164046
Chr1	2168829	2169829
Chr1	2177502	2178502
Chr1	2186843	2187843
Chr1	2187585	2188585
Chr1	2220010	2221010
Chr1	2221795	2222795
Chr1	2229337	2230337
Chr1	2231424	2232424
Chr1	2246231	2247231
Chr1	2285199	2286199
Chr1	2322237	2323237
Chr1	2322646	2323646
Chr1	2323878	2324878
Chr1	2343602	2344602
Chr1	2477623	2478623
Chr1	2478348	2479348
Chr1	2479439	2480439
Chr1	2481017	2482017
Chr1	2486860	2487860
Chr1	2487590	2488590
Chr1	2501469	2502469
Chr1	2506597	2507597
Chr1	2507073	2508073
Chr1	2508780	2509780
Chr1	2509410	2510410
Chr1	2509810	2510810
Chr1	2514945	2515945
Chr1	2516644	2517644
Chr1	2517519	2518519
Chr1	2517922	2518922
Chr1	2518628	2519628
Chr1	2523018	2524018
Chr1	2574176	2575176
Chr1	2574846	2575846
Chr1	2702902	2703902
Chr1	2705258	2706258
Chr1	2843659	2844659
Chr1	3087329	3088329
Chr1	3091111	3092111
Chr1	3108546	3109546
Chr1	3109024	3110024
Chr1	3138472	3139472
Chr1	3245190	3246190
Chr1	3280141	3281141
Chr1	3400107	3401107
Chr1	3418132	3419132
Chr1	3513737	3514737
Chr1	3537330	3538330
Chr1	3541796	3542796
Chr1	3546480	3547480
Chr1	3566187	3567187
Chr1	3585139	3586139
Chr1	3593042	3594042
Chr1	3593499	3594499
Chr1	3595244	3596244
Chr1	3604553	3605553
Chr1	3659676	3660676
Chr1	3663486	3664486
Chr1	3691723	3692723
Chr1	3709882	3710882
Chr1	3712583	3713583
Chr1	3773008	3774008
Chr1	3773432	3774432
Chr1	3774156	3775156
Chr1	3806206	3807206
Chr1	3807151	3808151
Chr1	3816779	3817779
Chr1	3821872	3822872
Chr1	4067287	4068287
Chr1	4698051	4699051
Chr1	5574349	5575349
Chr1	5830783	5831783
Chr1	6034917	6035917
Chr1	6039730	6040730
Chr1	6050945	6051945
Chr1	6051906	6052906
Chr1	6054458	6055458
Chr1	6067108	6068108
Chr1	6074409	6075409
Chr1	6084981	6085981
Chr1	6085826	6086826
Chr1	6086234	6087234
Chr1	6087627	6088627
Chr1	6088517	6089517
Chr1	6116028	6117028
Chr1	6118325	6119325
Chr1	6182782	6183782
Chr1	6187382	6188382
Chr1	6208338	6209338
Chr1	6259347	6260347
Chr1	6268433	6269433
Chr1	6295514	6296514
Chr1	6317304	6318304
Chr1	6403169	6404169
Chr1	6408324	6409324
Chr1	6417798	6418798
Chr1	6453033	6454033
Chr1	6453673	6454673
Chr1	6461436	6462436
Chr1	6474949	6475949
Chr1	6549616	6550616
Chr1	6613994	6614994
Chr1	6638780	6639780
Chr1	6639488	6640488
Chr1	6640086	6641086
Chr1	6640636	6641636
Chr1	6641705	6642705
Chr1	6643887	6644887
Chr1	6646889	6647889
Chr1	6651538	6652538
Chr1	6658528	6659528
Chr1	6659005	6660005
Chr1	6659886	6660886
Chr1	6660918	6661918
Chr1	6661582	6662582
Chr1	6662626	6663626
Chr1	6663609	6664609
Chr1	6672324	6673324
Chr1	6672765	6673765
Chr1	6684450	6685450
Chr1	6685383	6686383
Chr1	6760956	6761956
Chr1	6761533	6762533
Chr1	6803473	6804473
Chr1	6804876	6805876
Chr1	6807447	6808447
Chr1	6809077	6810077
Chr1	6811433	6812433
Chr1	6812832	6813832
Chr1	6813380	6814380
Chr1	6843726	6844726
Chr1	6844531	6845531
Chr1	6845462	6846462
Chr1	6860506	6861506
Chr1	7494909	7495909
Chr1	7706971	7707971
Chr1	7708704	7709704
Chr1	7830582	7831582
Chr1	7831178	7832178
Chr1	7841294	7842294
Chr1	7841716	7842716
Chr1	7844142	7845142
Chr1	7844689	7845689
Chr1	7916122	7917122
Chr1	7946104	7947104
Chr1	7959427	7960427
Chr1	7980362	7981362
Chr1	8000485	8001485
Chr1	8001159	8002159
Chr1	8002185	8003185
Chr1	8013714	8014714
Chr1	8019933	8020933
Chr1	8021271	8022271
Chr1	8053820	8054820
Chr1	8064538	8065538
Chr1	8085902	8086902
Chr1	8086533	8087533
Chr1	8106893	8107893
Chr1	8156378	8157378
Chr1	8164332	8165332
Chr1	8164795	8165795
Chr1	8186941	8187941
Chr1	8229490	8230490
Chr1	8242566	8243566
Chr1	8264188	8265188
Chr1	8271250	8272250
Chr1	8272038	8273038
Chr1	8278399	8279399
Chr1	8297849	8298849
Chr1	8342953	8343953
Chr1	8377656	8378656
Chr1	8408738	8409738
Chr1	8442646	8443646
Chr1	8447794	8448794
Chr1	8455360	8456360
Chr1	8468943	8469943
Chr1	8482330	8483330
Chr1	8483548	8484548
Chr1	8484045	8485045
Chr1	8487284	8488284
Chr1	8487753	8488753
Chr1	8490776	8491776
Chr1	8491879	8492879
Chr1	8498657	8499657
Chr1	8557141	8558141
Chr1	8558392	8559392
Chr1	8569944	8570944
Chr1	8585492	8586492
Chr1	8689543	8690543
Chr1	8720187	8721187
Chr1	8723720	8724720
Chr1	8760991	8761991
Chr1	8763018	8764018
Chr1	8772514	8773514
Chr1	8876509	8877509
Chr1	8877309	8878309
Chr1	8877722	8878722
Chr1	8919155	8920155
Chr1	8922212	8923212
Chr1	8925547	8926547
Chr1	8930856	8931856
Chr1	8933300	8934300
Chr1	8936197	8937197
Chr1	8937112	8938112
Chr1	8937682	8938682
Chr1	8938676	8939676
Chr1	8949643	8950643
Chr1	9043444	9044444
Chr1	9064904	9065904
Chr1	9067504	9068504
Chr1	9069743	9070743
Chr1	9070654	9071654
Chr1	9071301	9072301
Chr1	9120983	9121983
Chr1	9129378	9130378
Chr1	9132898	9133898
Chr1	9134705	9135705
Chr1	9138346	9139346
Chr1	9142534	9143534
Chr1	9143042	9144042
Chr1	9153342	9154342
Chr1	9153868	9154868
Chr1	9170507	9171507
Chr1	9181204	9182204
Chr1	9187775	9188775
Chr1	9191300	9192300
Chr1	9195261	9196261
Chr1	9201950	9202950
Chr1	9203073	9204073
Chr1	9204981	9205981
Chr1	9223565	9224565
Chr1	9233948	9234948
Chr1	9256544	9257544
Chr1	9288467	9289467
Chr1	9289305	9290305
Chr1	9292940	9293940
Chr1	9294890	9295890
Chr1	9299446	9300446
Chr1	9303088	9304088
Chr1	9304285	9305285
Chr1	9309783	9310783
Chr1	9335377	9336377
Chr1	9337896	9338896
Chr1	9339190	9340190
Chr1	9349616	9350616
Chr1	9350270	9351270
Chr1	9400620	9401620
Chr1	9422017	9423017
Chr1	9422771	9423771
Chr1	9433401	9434401
Chr1	9470716	9471716
Chr1	9488554	9489554
Chr1	9489094	9490094
Chr1	9550781	9551781
Chr1	9554968	9555968
Chr1	9588942	9589942
Chr1	9598924	9599924
Chr1	9599661	9600661
Chr1	9653171	9654171
Chr1	9686774	9687774
Chr1	9689210	9690210
Chr1	9698394	9699394
Chr1	9703303	9704303
Chr1	9703723	9704723
Chr1	9704353	9705353
Chr1	9711258	9712258
Chr1	9711764	9712764
Chr1	9714163	9715163
Chr1	9714912	9715912
Chr1	9729795	9730795
Chr1	9743138	9744138
Chr1	9744583	9745583
Chr1	9745620	9746620
Chr1	9747042	9748042
Chr1	9749042	9750042
Chr1	9761974	9762974
Chr1	9777330	9778330
Chr1	9778870	9779870
Chr1	9780996	9781996
Chr1	9790290	9791290
Chr1	9796819	9797819
Chr1	9883144	9884144
Chr1	9883594	9884594
Chr1	9884127	9885127
Chr1	9885276	9886276
Chr1	9905728	9906728
Chr1	9927217	9928217
Chr1	9934639	9935639
Chr1	9950087	9951087
Chr1	9952890	9953890
Chr1	9958672	9959672
Chr1	9964808	9965808
Chr1	9969422	9970422
Chr1	9970027	9971027
Chr1	9970514	9971514
Chr1	10002082	10003082
Chr1	10002798	10003798
Chr1	10003397	10004397
Chr1	10010168	10011168
Chr1	10010678	10011678
Chr1	10050614	10051614
Chr1	10052683	10053683
Chr1	10056633	10057633
Chr1	10082441	10083441
Chr1	10088861	10089861
Chr1	10092557	10093557
Chr1	10093296	10094296
Chr1	10115649	10116649
Chr1	10117067	10118067
Chr1	10125097	10126097
Chr1	10126733	10127733
Chr1	10133830	10134830
Chr1	10207825	10208825
Chr1	10268318	10269318
Chr1	10269793	10270793
Chr1	10271176	10272176
Chr1	10310905	10311905
Chr1	10311484	10312484
Chr1	10437873	10438873
Chr1	10458445	10459445
Chr1	10459379	10460379
Chr1	10460226	10461226
Chr1	10474973	10475973
Chr1	10489970	10490970
Chr1	10532170	10533170
Chr1	10534505	10535505
Chr1	10535138	10536138
Chr1	10544156	10545156
Chr1	10575343	10576343
Chr1	10752112	10753112
Chr1	10753260	10754260
Chr1	10753966	10754966
Chr1	10754383	10755383
Chr1	10790776	10791776
Chr1	11024803	11025803
Chr1	11025450	11026450
Chr1	11025924	11026924
Chr1	11026831	11027831
Chr1	11072171	11073171
Chr1	11072676	11073676
Chr1	11111572	11112572
Chr1	11127861	11128861
Chr1	11158975	11159975
Chr1	11159419	11160419
Chr1	11322260	11323260
Chr1	11332156	11333156
Chr1	11332762	11333762
Chr1	11333249	11334249
Chr1	11710091	11711091
Chr1	11722400	11723400
Chr1	11723714	11724714
Chr1	11730395	11731395
Chr1	11740232	11741232
Chr1	11740756	11741756
Chr1	11752923	11753923
Chr1	11770835	11771835
Chr1	11784405	11785405
Chr1	11785381	11786381
Chr1	11789219	11790219
Chr1	11791339	11792339
Chr1	11791769	11792769
Chr1	11796317	11797317
Chr1	11798553	11799553
Chr1	11808913	11809913
Chr1	11821717	11822717
Chr1	11844912	11845912
Chr1	11850570	11851570
Chr1	11851713	11852713
Chr1	11862289	11863289
Chr1	11862927	11863927
Chr1	11865475	11866475
Chr1	11872767	11873767
Chr1	11874300	11875300
Chr1	11874779	11875779
Chr1	11897693	11898693
Chr1	11898443	11899443
Chr1	11900958	11901958
Chr1	11902491	11903491
Chr1	11903215	11904215
Chr1	11911007	11912007
Chr1	11917209	11918209
Chr1	11952996	11953996
Chr1	11968469	11969469
Chr1	11970364	11971364
Chr1	11976673	11977673
Chr1	11986539	11987539
Chr1	11994207	11995207
Chr1	12020273	12021273
Chr1	12020965	12021965
Chr1	12025099	12026099
Chr1	12038125	12039125
Chr1	12039261	12040261
Chr1	12040208	12041208
Chr1	12044940	12045940
Chr1	12045672	12046672
Chr1	12077922	12078922
Chr1	12078920	12079920
Chr1	12079833	12080833
Chr1	12094727	12095727
Chr1	12107290	12108290
Chr1	12113913	12114913
Chr1	12147360	12148360
Chr1	12184585	12185585
Chr1	12185068	12186068
Chr1	12191839	12192839
Chr1	12192748	12193748
Chr1	12200663	12201663
Chr1	12201868	12202868
Chr1	12202381	12203381
Chr1	12203372	12204372
Chr1	12206360	12207360
Chr1	12206945	12207945
Chr1	12209946	12210946
Chr1	12210575	12211575
Chr1	12212964	12213964
Chr1	12217341	12218341
Chr1	12221452	12222452
Chr1	12222024	12223024
Chr1	12223965	12224965
Chr1	12233431	12234431
Chr1	12234841	12235841
Chr1	12237165	12238165
Chr1	12237880	12238880
Chr1	12238784	12239784
Chr1	12240090	12241090
Chr1	12243892	12244892
Chr1	12244822	12245822
Chr1	12254472	12255472
Chr1	12270228	12271228
Chr1	12289568	12290568
Chr1	12435768	12436768
Chr1	12436502	12437502
Chr1	12532903	12533903
Chr1	12540448	12541448
Chr1	12570002	12571002
Chr1	12612664	12613664
Chr1	12655525	12656525
Chr1	12656253	12657253
Chr1	12661577	12662577
Chr1	12663774	12664774
Chr1	12675349	12676349
Chr1	12675753	12676753
Chr1	12678737	12679737
Chr1	12690863	12691863
Chr1	13919903	13920903
Chr1	13948641	13949641
Chr1	13949464	13950464
Chr1	13968818	13969818
Chr1	13988249	13989249
Chr1	14025685	14026685
Chr1	14026149	14027149
Chr1	14026925	14027925
Chr1	14049186	14050186
Chr1	14049616	14050616
Chr1	14057075	14058075
Chr1	14059163	14060163
Chr1	14075133	14076133
Chr1	14075724	14076724
Chr1	14079853	14080853
Chr1	14095387	14096387
Chr1	14108136	14109136
Chr1	14137368	14138368
Chr1	14869682	14870682
Chr1	15065631	15066631
Chr1	15342650	15343650
Chr1	15409782	15410782
Chr1	15438423	15439423
Chr1	15462560	15463560
Chr1	15463990	15464990
Chr1	15473133	15474133
Chr1	15478505	15479505
Chr1	15479126	15480126
Chr1	15480253	15481253
Chr1	15484981	15485981
Chr1	15494708	15495708
Chr1	15503921	15504921
Chr1	15526804	15527804
Chr1	15537208	15538208
Chr1	15539477	15540477
Chr1	15541334	15542334
Chr1	15551109	15552109
Chr1	15555794	15556794
Chr1	15557870	15558870
Chr1	15569791	15570791
Chr1	15571012	15572012
Chr1	15572147	15573147
Chr1	15573240	15574240
Chr1	15574415	15575415
Chr1	15575229	15576229
Chr1	15584388	15585388
Chr1	15585104	15586104
Chr1	15587252	15588252
Chr1	15598683	15599683
Chr1	15649052	15650052
Chr1	15649703	15650703
Chr1	15655259	15656259
Chr1	15678615	15679615
Chr1	15688926	15689926
Chr1	15694286	15695286
Chr1	15712684	15713684
Chr1	15735503	15736503
Chr1	15736184	15737184
Chr1	15736924	15737924
Chr1	15737803	15738803
Chr1	15738297	15739297
Chr1	15741802	15742802
Chr1	15742250	15743250
Chr1	15743749	15744749
Chr1	15747778	15748778
Chr1	15752967	15753967
Chr1	15755941	15756941
Chr1	15756440	15757440
Chr1	15757236	15758236
Chr1	15759079	15760079
Chr1	15760959	15761959
Chr1	15790406	15791406
Chr1	15790952	15791952
Chr1	15849628	15850628
Chr1	15850592	15851592
Chr1	15852813	15853813
Chr1	15929282	15930282
Chr1	15929783	15930783
Chr1	15930585	15931585
Chr1	15943370	15944370
Chr1	15943993	15944993
Chr1	15944586	15945586
Chr1	16000579	16001579
Chr1	16002179	16003179
Chr1	16004751	16005751
Chr1	16006304	16007304
Chr1	16008483	16009483
Chr1	16010971	16011971
Chr1	16013660	16014660
Chr1	16023093	16024093
Chr1	16038424	16039424
Chr1	16062364	16063364
Chr1	16106982	16107982
Chr1	16114933	16115933
Chr1	16151974	16152974
Chr1	16155968	16156968
Chr1	16159249	16160249
Chr1	16161384	16162384
Chr1	16161940	16162940
Chr1	16163314	16164314
Chr1	16172762	16173762
Chr1	16173220	16174220
Chr1	16173657	16174657
Chr1	16174139	16175139
Chr1	16174646	16175646
Chr1	16176058	16177058
Chr1	16208953	16209953
Chr1	16212435	16213435
Chr1	16219372	16220372
Chr1	16263796	16264796
Chr1	16267705	16268705
Chr1	16274830	16275830
Chr1	16275761	16276761
Chr1	16279418	16280418
Chr1	16290076	16291076
Chr1	16292633	16293633
Chr1	16301497	16302497
Chr1	16302152	16303152
Chr1	16338805	16339805
Chr1	16339383	16340383
Chr1	16381903	16382903
Chr1	16405058	16406058
Chr1	16480839	16481839
Chr1	16494798	16495798
Chr1	16499425	16500425
Chr1	16532078	16533078
Chr1	16532537	16533537
Chr1	16533052	16534052
Chr1	16534487	16535487
Chr1	16543472	16544472
Chr1	16554007	16555007
Chr1	16562222	16563222
Chr1	16563243	16564243
Chr1	16619671	16620671
Chr1	16622851	16623851
Chr1	16629168	16630168
Chr1	16668939	16669939
Chr1	16675079	16676079
Chr1	16677089	16678089
Chr1	16677668	16678668
Chr1	16678231	16679231
Chr1	16689557	16690557
Chr1	16690707	16691707
Chr1	16691198	16692198
Chr1	16692616	16693616
Chr1	16693437	16694437
Chr1	16694214	16695214
Chr1	16697969	16698969
Chr1	16701411	16702411
Chr1	16713326	16714326
Chr1	16717684	16718684
Chr1	16766333	16767333
Chr1	16767334	16768334
Chr1	16768458	16769458
Chr1	16788510	16789510
Chr1	16839605	16840605
Chr1	16840034	16841034
Chr1	16840631	16841631
Chr1	16860474	16861474
Chr1	16933643	16934643
Chr1	16938643	16939643
Chr1	16939520	16940520
Chr1	16939947	16940947
Chr1	16947185	16948185
Chr1	16948182	16949182
Chr1	16949593	16950593
Chr1	16950264	16951264
Chr1	16951766	16952766
Chr1	16952540	16953540
Chr1	16955699	16956699
Chr1	16956891	16957891
Chr1	16958053	16959053
Chr1	16969971	16970971
Chr1	16970712	16971712
Chr1	16971418	16972418
Chr1	17000817	17001817
Chr1	17215087	17216087
Chr1	17215538	17216538
Chr1	17222213	17223213
Chr1	17222685	17223685
Chr1	17223119	17224119
Chr1	17230404	17231404
Chr1	17231218	17232218
Chr1	17232074	17233074
Chr1	17233323	17234323
Chr1	17238989	17239989
Chr1	17239677	17240677
Chr1	17286805	17287805
Chr1	17289616	17290616
Chr1	17335814	17336814
Chr1	17337974	17338974
Chr1	17371335	17372335
Chr1	17380171	17381171
Chr1	17386576	17387576
Chr1	17388964	17389964
Chr1	17391907	17392907
Chr1	17392733	17393733
Chr1	17393224	17394224
Chr1	17401583	17402583
Chr1	17408167	17409167
Chr1	17424182	17425182
Chr1	17424636	17425636
Chr1	17433875	17434875
Chr1	17444899	17445899
Chr1	17445546	17446546
Chr1	17446359	17447359
Chr1	17454575	17455575
Chr1	17467548	17468548
Chr1	17487478	17488478
Chr1	17502871	17503871
Chr1	17507847	17508847
Chr1	17517342	17518342
Chr1	17518025	17519025
Chr1	17533231	17534231
Chr1	17533737	17534737
Chr1	17534186	17535186
Chr1	17602792	17603792
Chr1	17607784	17608784
Chr1	17608495	17609495
Chr1	17613604	17614604
Chr1	17634747	17635747
Chr1	17636746	17637746
Chr1	17638613	17639613
Chr1	17674549	17675549
Chr1	17691192	17692192
Chr1	17724467	17725467
Chr1	17746016	17747016
Chr1	17757661	17758661
Chr1	17758127	17759127
Chr1	17763704	17764704
Chr1	17764312	17765312
Chr1	17765389	17766389
Chr1	17765840	17766840
Chr1	17791438	17792438
Chr1	17835518	17836518
Chr1	17880192	17881192
Chr1	17895795	17896795
Chr1	17907500	17908500
Chr1	17912391	17913391
Chr1	17933028	17934028
Chr1	17934280	17935280
Chr1	17940753	17941753
Chr1	17941358	17942358
Chr1	17944347	17945347
Chr1	17956310	17957310
Chr1	17957728	17958728
Chr1	17959836	17960836
Chr1	17961905	17962905
Chr1	17963934	17964934
Chr1	17966174	17967174
Chr1	17999868	18000868
Chr1	18000957	18001957
Chr1	18632233	18633233
Chr1	19227332	19228332
Chr1	19228759	19229759
Chr1	19233452	19234452
Chr1	19234128	19235128
Chr1	19239235	19240235
Chr1	19248472	19249472
Chr1	19250368	19251368
Chr1	19253857	19254857
Chr1	19273081	19274081
Chr1	19276961	19277961
Chr1	19277946	19278946
Chr1	19337279	19338279
Chr1	19400427	19401427
Chr1	19405980	19406980
Chr1	19407319	19408319
Chr1	19408007	19409007
Chr1	19535730	19536730
Chr1	19536365	19537365
Chr1	19577600	19578600
Chr1	19637700	19638700
Chr1	19638160	19639160
Chr1	19638818	19639818
Chr1	19641619	19642619
Chr1	19652912	19653912
Chr1	19667679	19668679
Chr1	19672191	19673191
Chr1	19696490	19697490
Chr1	19696967	19697967
Chr1	19717151	19718151
Chr1	19761366	19762366
Chr1	19762874	19763874
Chr1	19774641	19775641
Chr1	19775196	19776196
Chr1	19779883	19780883
Chr1	19781007	19782007
Chr1	19794624	19795624
Chr1	19795545	19796545
Chr1	19802993	19803993
Chr1	19804071	19805071
Chr1	19810703	19811703
Chr1	19811811	19812811
Chr1	19828515	19829515
Chr1	19835024	19836024
Chr1	19837317	19838317
Chr1	19843008	19844008
Chr1	19883877	19884877
Chr1	19906043	19907043
Chr1	19907084	19908084
Chr1	19922825	19923825
Chr1	19923402	19924402
Chr1	20024037	20025037
Chr1	20208421	20209421
Chr1	20386098	20387098
Chr1	20388078	20389078
Chr1	20427102	20428102
Chr1	20450275	20451275
Chr1	20478480	20479480
Chr1	20479334	20480334
Chr1	20480117	20481117
Chr1	20501178	20502178
Chr1	20505359	20506359
Chr1	20819390	20820390
Chr1	20820003	20821003
Chr1	20820499	20821499
Chr1	20833896	20834896
Chr1	20834381	20835381
Chr1	20913493	20914493
Chr1	20914090	20915090
Chr1	20914896	20915896
Chr1	20915362	20916362
Chr1	20916488	20917488
Chr1	20923909	20924909
Chr1	20929075	20930075
Chr1	20930281	20931281
Chr1	20959380	20960380
Chr1	20960075	20961075
Chr1	20965906	20966906
Chr1	20986967	20987967
Chr1	20987573	20988573
Chr1	21004811	21005811
Chr1	21010364	21011364
Chr1	21013332	21014332
Chr1	21022631	21023631
Chr1	21033182	21034182
Chr1	21058860	21059860
Chr1	21059355	21060355
Chr1	21112118	21113118
Chr1	21112755	21113755
Chr1	21113329	21114329
Chr1	21113759	21114759
Chr1	21177987	21178987
Chr1	21276073	21277073
Chr1	21377353	21378353
Chr1	21378232	21379232
Chr1	21403284	21404284
Chr1	21416614	21417614
Chr1	21425253	21426253
Chr1	21426638	21427638
Chr1	21440596	21441596
Chr1	21476925	21477925
Chr1	21491831	21492831
Chr1	21501563	21502563
Chr1	21502874	21503874
Chr1	21508335	21509335
Chr1	21544136	21545136
Chr1	21545696	21546696
Chr1	21559714	21560714
Chr1	21588003	21589003
Chr1	21588587	21589587
Chr1	21606196	21607196
Chr1	21611065	21612065
Chr1	21614096	21615096
Chr1	21615174	21616174
Chr1	21615758	21616758
Chr1	21616406	21617406
Chr1	21620427	21621427
Chr1	21624138	21625138
Chr1	21628838	21629838
Chr1	21643509	21644509
Chr1	21651034	21652034
Chr1	21660550	21661550
Chr1	21661359	21662359
Chr1	21664091	21665091
Chr1	21671665	21672665
Chr1	21780147	21781147
Chr1	21795793	21796793
Chr1	21851146	21852146
Chr1	21933956	21934956
Chr1	21964631	21965631
Chr1	21999476	22000476
Chr1	22032680	22033680
Chr1	22047453	22048453
Chr1	22087266	22088266
Chr1	22090792	22091792
Chr1	22093257	22094257
Chr1	22094452	22095452
Chr1	22095806	22096806
Chr1	22097935	22098935
Chr1	22106403	22107403
Chr1	22108074	22109074
Chr1	22108602	22109602
Chr1	22109433	22110433
Chr1	22117762	22118762
Chr1	22125022	22126022
Chr1	22140478	22141478
Chr1	22141843	22142843
Chr1	22149883	22150883
Chr1	22183598	22184598
Chr1	22184066	22185066
Chr1	22239982	22240982
Chr1	22345289	22346289
Chr1	22350348	22351348
Chr1	22351448	22352448
Chr1	22352199	22353199
Chr1	22357754	22358754
Chr1	22364327	22365327
Chr1	22366406	22367406
Chr1	22374612	22375612
Chr1	22378654	22379654
Chr1	22379412	22380412
Chr1	22380028	22381028
Chr1	22380596	22381596
Chr1	22383122	22384122
Chr1	22400862	22401862
Chr1	22401941	22402941
Chr1	22777817	22778817
Chr1	22962543	22963543
Chr1	23000310	23001310
Chr1	23061386	23062386
Chr1	23072258	23073258
Chr1	23073560	23074560
Chr1	23076513	23077513
Chr1	23158236	23159236
Chr1	23160531	23161531
Chr1	23290350	23291350
Chr1	23331959	23332959
Chr1	23336679	23337679
Chr1	23337352	23338352
Chr1	23339791	23340791
Chr1	23341689	23342689
Chr1	23344980	23345980
Chr1	23345404	23346404
Chr1	23429523	23430523
Chr1	23493777	23494777
Chr1	23494248	23495248
Chr1	23494871	23495871
Chr1	23495755	23496755
Chr1	23609095	23610095
Chr1	23614388	23615388
Chr1	23654815	23655815
Chr1	23669388	23670388
Chr1	23669936	23670936
Chr1	23694140	23695140
Chr1	23694883	23695883
Chr1	23704443	23705443
Chr1	23728429	23729429
Chr1	23728851	23729851
Chr1	23748489	23749489
Chr1	23810504	23811504
Chr1	23823966	23824966
Chr1	23848801	23849801
Chr1	23851365	23852365
Chr1	23851969	23852969
Chr1	23853530	23854530
Chr1	23854269	23855269
Chr1	23856230	23857230
Chr1	23857358	23858358
Chr1	23858434	23859434
Chr1	23859415	23860415
Chr1	23860934	23861934
Chr1	23863563	23864563
Chr1	23865983	23866983
Chr1	23881035	23882035
Chr1	23885264	23886264
Chr1	23886032	23887032
Chr1	23886443	23887443
Chr1	23888507	23889507
Chr1	23893358	23894358
Chr1	23911694	23912694
Chr1	23916195	23917195
Chr1	23950562	23951562
Chr1	23965534	23966534
Chr1	24017765	24018765
Chr1	24018219	24019219
Chr1	24052872	24053872
Chr1	24053481	24054481
Chr1	24054263	24055263
Chr1	24054667	24055667
Chr1	24069455	24070455
Chr1	24070784	24071784
Chr1	24103956	24104956
Chr1	24104402	24105402
Chr1	24116299	24117299
Chr1	24117080	24118080
Chr1	24117683	24118683
Chr1	24125646	24126646
Chr1	24126084	24127084
Chr1	24126717	24127717
Chr1	24127156	24128156
Chr1	24127570	24128570
Chr1	24130621	24131621
Chr1	24133201	24134201
Chr1	24135955	24136955
Chr1	24137059	24138059
Chr1	24150999	24151999
Chr1	24164584	24165584
Chr1	24165409	24166409
Chr1	24191777	24192777
Chr1	24194025	24195025
Chr1	24195293	24196293
Chr1	24220014	24221014
Chr1	24221276	24222276
Chr1	24221833	24222833
Chr1	24223265	24224265
Chr1	24223842	24224842
Chr1	24233935	24234935
Chr1	24234924	24235924
Chr1	24235554	24236554
Chr1	24238108	24239108
Chr1	24239424	24240424
Chr1	24242391	24243391
Chr1	24242979	24243979
Chr1	24277733	24278733
Chr1	24281330	24282330
Chr1	24285129	24286129
Chr1	24285921	24286921
Chr1	24286545	24287545
Chr1	24306337	24307337
Chr1	24306936	24307936
Chr1	24516373	24517373
Chr1	24518081	24519081
Chr1	24575076	24576076
Chr1	24691402	24692402
Chr1	24710545	24711545
Chr1	24711341	24712341
Chr1	24711778	24712778
Chr1	24739435	24740435
Chr1	24745401	24746401
Chr1	24746715	24747715
Chr1	24807291	24808291
Chr1	24808135	24809135
Chr1	24827442	24828442
Chr1	24828050	24829050
Chr1	24828510	24829510
Chr1	24867188	24868188
Chr1	24885203	24886203
Chr1	24894102	24895102
Chr1	24966028	24967028
Chr1	24967603	24968603
Chr1	24968011	24969011
Chr1	24969638	24970638
Chr1	25020127	25021127
Chr1	25021614	25022614
Chr1	25031451	25032451
Chr1	25035140	25036140
Chr1	25036085	25037085
Chr1	25058383	25059383
Chr1	25059479	25060479
Chr1	25071178	25072178
Chr1	25072296	25073296
Chr1	25072745	25073745
Chr1	25088560	25089560
Chr1	25112306	25113306
Chr1	25131721	25132721
Chr1	25149087	25150087
Chr1	25174237	25175237
Chr1	25174812	25175812
Chr1	25197517	25198517
Chr1	25198686	25199686
Chr1	25237267	25238267
Chr1	25254058	25255058
Chr1	25254625	25255625
Chr1	25255103	25256103
Chr1	25255664	25256664
Chr1	25256554	25257554
Chr1	25258397	25259397
Chr1	25274217	25275217
Chr1	25283194	25284194
Chr1	25292308	25293308
Chr1	25292811	25293811
Chr1	25317165	25318165
Chr1	25333566	25334566
Chr1	25337479	25338479
Chr1	25338382	25339382
Chr1	25354709	25355709
Chr1	25355314	25356314
Chr1	25356858	25357858
Chr1	25360153	25361153
Chr1	25379966	25380966
Chr1	25406663	25407663
Chr1	25425446	25426446
Chr1	25427624	25428624
Chr1	25430409	25431409
Chr1	25435614	25436614
Chr1	25436049	25437049
Chr1	25436687	25437687
Chr1	25438579	25439579
Chr1	25439223	25440223
Chr1	25446473	25447473
Chr1	25466402	25467402
Chr1	25526489	25527489
Chr1	25558042	25559042
Chr1	25558507	25559507
Chr1	25559224	25560224
Chr1	25564891	25565891
Chr1	25565928	25566928
Chr1	25566365	25567365
Chr1	25572191	25573191
Chr1	25572769	25573769
Chr1	25573428	25574428
Chr1	25585934	25586934
Chr1	25695309	25696309
Chr1	25756514	25757514
Chr1	25757124	25758124
Chr1	25778107	25779107
Chr1	25782396	25783396
Chr1	25846632	25847632
Chr1	25863212	25864212
Chr1	25867089	25868089
Chr1	25869578	25870578
Chr1	25870583	25871583
Chr1	25876111	25877111
Chr1	25882667	25883667
Chr1	25888619	25889619
Chr1	25907010	25908010
Chr1	25941975	25942975
Chr1	25942644	25943644
Chr1	25943820	25944820
Chr1	26005381	26006381
Chr1	26037720	26038720
Chr1	26123006	26124006
Chr1	26135703	26136703
Chr1	26145845	26146845
Chr1	26146771	26147771
Chr1	26147340	26148340
Chr1	26185567	26186567
Chr1	26186092	26187092
Chr1	26187383	26188383
Chr1	26198907	26199907
Chr1	26201191	26202191
Chr1	26201668	26202668
Chr1	26221541	26222541
Chr1	26231109	26232109
Chr1	26248754	26249754
Chr1	26249212	26250212
Chr1	26297454	26298454
Chr1	26323757	26324757
Chr1	26341568	26342568
Chr1	26343011	26344011
Chr1	26358904	26359904
Chr1	26361406	26362406
Chr1	26362083	26363083
Chr1	26436829	26437829
Chr1	26437790	26438790
Chr1	26438262	26439262
Chr1	26452673	26453673
Chr1	26453455	26454455
Chr1	26478734	26479734
Chr1	26495900	26496900
Chr1	26551198	26552198
Chr1	26556868	26557868
Chr1	26560190	26561190
Chr1	26561050	26562050
Chr1	26600913	26601913
Chr1	26602212	26603212
Chr1	26605186	26606186
Chr1	26605886	26606886
Chr1	26606521	26607521
Chr1	26608972	26609972
Chr1	26610945	26611945
Chr1	26616302	26617302
Chr1	26617092	26618092
Chr1	26618906	26619906
Chr1	26624328	26625328
Chr1	26629553	26630553
Chr1	26632485	26633485
Chr1	26633115	26634115
Chr1	26634366	26635366
Chr1	26641546	26642546
Chr1	26643377	26644377
Chr1	26645696	26646696
Chr1	26647630	26648630
Chr1	26722451	26723451
Chr1	26758339	26759339
Chr1	26759564	26760564
Chr1	26797469	26798469
Chr1	26798193	26799193
Chr1	26799021	26800021
Chr1	26826283	26827283
Chr1	26827067	26828067
Chr1	26855477	26856477
Chr1	26856136	26857136
Chr1	26857295	26858295
Chr1	26864231	26865231
Chr1	26865989	26866989
Chr1	26868528	26869528
Chr1	26871748	26872748
Chr1	26872610	26873610
Chr1	26880108	26881108
Chr1	26900202	26901202
Chr1	26900873	26901873
Chr1	26908910	26909910
Chr1	26925084	26926084
Chr1	26933323	26934323
Chr1	26933776	26934776
Chr1	26935039	26936039
Chr1	26945591	26946591
Chr1	26947005	26948005
Chr1	26954140	26955140
Chr1	26965559	26966559
Chr1	26966096	26967096
Chr1	26973932	26974932
Chr1	26974470	26975470
Chr1	27003586	27004586
Chr1	27018449	27019449
Chr1	27019086	27020086
Chr1	27021585	27022585
Chr1	27022880	27023880
Chr1	27047872	27048872
Chr1	27049751	27050751
Chr1	27070277	27071277
Chr1	27070826	27071826
Chr1	27097935	27098935
Chr1	27110153	27111153
Chr1	27112326	27113326
Chr1	27112726	27113726
Chr1	27113414	27114414
Chr1	27115323	27116323
Chr1	27131290	27132290
Chr1	27146946	27147946
Chr1	27152395	27153395
Chr1	27153038	27154038
Chr1	27154795	27155795
Chr1	27159729	27160729
Chr1	27190431	27191431
Chr1	27191256	27192256
Chr1	27216147	27217147
Chr1	27226550	27227550
Chr1	27247366	27248366
Chr1	27258724	27259724
Chr1	27316766	27317766
Chr1	27317577	27318577
Chr1	27323811	27324811
Chr1	27326895	27327895
Chr1	27328018	27329018
Chr1	27328856	27329856
Chr1	27339061	27340061
Chr1	27341433	27342433
Chr1	27357856	27358856
Chr1	27364118	27365118
Chr1	27370676	27371676
Chr1	27393823	27394823
Chr1	27400456	27401456
Chr1	27421746	27422746
Chr1	27424597	27425597
Chr1	27425171	27426171
Chr1	27425744	27426744
Chr1	27431442	27432442
Chr1	27432626	27433626
Chr1	27437264	27438264
Chr1	27438125	27439125
Chr1	27441985	27442985
Chr1	27445665	27446665
Chr1	27446069	27447069
Chr1	27448500	27449500
Chr1	27456980	27457980
Chr1	27461759	27462759
Chr1	27463390	27464390
Chr1	27480835	27481835
Chr1	27481424	27482424
Chr1	27487818	27488818
Chr1	27518251	27519251
Chr1	27518891	27519891
Chr1	27559807	27560807
Chr1	27560508	27561508
Chr1	27561258	27562258
Chr1	27561968	27562968
Chr1	27601899	27602899
Chr1	27602823	27603823
Chr1	27626090	27627090
Chr1	27626534	27627534
Chr1	27626961	27627961
Chr1	27648252	27649252
Chr1	27667592	27668592
Chr1	27668020	27669020
Chr1	27668614	27669614
Chr1	27669021	27670021
Chr1	27669441	27670441
Chr1	27682688	27683688
Chr1	27683292	27684292
Chr1	27691476	27692476
Chr1	27691909	27692909
Chr1	27692588	27693588
Chr1	27695882	27696882
Chr1	27718401	27719401
Chr1	27721545	27722545
Chr1	27728551	27729551
Chr1	27729427	27730427
Chr1	27744518	27745518
Chr1	27753487	27754487
Chr1	27757162	27758162
Chr1	27762080	27763080
Chr1	27762740	27763740
Chr1	27764894	27765894
Chr1	27814153	27815153
Chr1	27814910	27815910
Chr1	27815727	27816727
Chr1	27816407	27817407
Chr1	27834563	27835563
Chr1	27839704	27840704
Chr1	27847575	27848575
Chr1	27851702	27852702
Chr1	27852654	27853654
Chr1	27854090	27855090
Chr1	27854611	27855611
Chr1	27882954	27883954
Chr1	27883562	27884562
Chr1	27890176	27891176
Chr1	27894640	27895640
Chr1	27927840	27928840
Chr1	27928359	27929359
Chr1	27935336	27936336
Chr1	27935781	27936781
Chr1	27942631	27943631
Chr1	27944482	27945482
Chr1	27946380	27947380
Chr1	27947258	27948258
Chr1	27951407	27952407
Chr1	27952319	27953319
Chr1	27957539	27958539
Chr1	27958499	27959499
Chr1	27960534	27961534
Chr1	27961161	27962161
Chr1	27961592	27962592
Chr1	27966695	27967695
Chr1	27976313	27977313
Chr1	27977121	27978121
Chr1	27981803	27982803
Chr1	27982312	27983312
Chr1	27985588	27986588
Chr1	27986555	27987555
Chr1	27989122	27990122
Chr1	27992868	27993868
Chr1	27993767	27994767
Chr1	27995456	27996456
Chr1	27997329	27998329
Chr1	27998315	27999315
Chr1	28051248	28052248
Chr1	28051796	28052796
Chr1	28052304	28053304
Chr1	28052799	28053799
Chr1	28098493	28099493
Chr1	28099093	28100093
Chr1	28099825	28100825
Chr1	28106101	28107101
Chr1	28107150	28108150
Chr1	28156567	28157567
Chr1	28189352	28190352
Chr1	28190048	28191048
Chr1	28191631	28192631
Chr1	28196083	28197083
Chr1	28198466	28199466
Chr1	28199234	28200234
Chr1	28201450	28202450
Chr1	28208396	28209396
Chr1	28211991	28212991
Chr1	28213116	28214116
Chr1	28213826	28214826
Chr1	28216783	28217783
Chr1	28217791	28218791
Chr1	28221960	28222960
Chr1	28228148	28229148
Chr1	28230644	28231644
Chr1	28240730	28241730
Chr1	28257995	28258995
Chr1	28266241	28267241
Chr1	28269933	28270933
Chr1	28286085	28287085
Chr1	28287176	28288176
Chr1	28318475	28319475
Chr1	28320271	28321271
Chr1	28388971	28389971
Chr1	28390308	28391308
Chr1	28413813	28414813
Chr1	28422861	28423861
Chr1	28431428	28432428
Chr1	28433938	28434938
Chr1	28437141	28438141
Chr1	28438826	28439826
Chr1	28440433	28441433
Chr1	28441360	28442360
Chr1	28441771	28442771
Chr1	28442177	28443177
Chr1	28449750	28450750
Chr1	28453160	28454160
Chr1	28453778	28454778
Chr1	28464733	28465733
Chr1	28465137	28466137
Chr1	28466075	28467075
Chr1	28469770	28470770
Chr1	28479346	28480346
Chr1	28480268	28481268
Chr1	28481003	28482003
Chr1	28483036	28484036
Chr1	28485471	28486471
Chr1	28487678	28488678
Chr1	28495464	28496464
Chr1	28499233	28500233
Chr1	28500803	28501803
Chr1	28501261	28502261
Chr1	28502167	28503167
Chr1	28502702	28503702
Chr1	28507188	28508188
Chr1	28516618	28517618
Chr1	28558753	28559753
Chr1	28561423	28562423
Chr1	28562038	28563038
Chr1	28570243	28571243
Chr1	28570744	28571744
Chr1	28572508	28573508
Chr1	28573015	28574015
Chr1	28574281	28575281
Chr1	28575660	28576660
Chr1	28576918	28577918
Chr1	28585253	28586253
Chr1	28586078	28587078
Chr1	28609312	28610312
Chr1	28617701	28618701
Chr1	28640330	28641330
Chr1	28641343	28642343
Chr1	28652296	28653296
Chr1	28652734	28653734
Chr1	28653170	28654170
Chr1	28654994	28655994
Chr1	28655589	28656589
Chr1	28656527	28657527
Chr1	28672377	28673377
Chr1	28695647	28696647
Chr1	28696203	28697203
Chr1	28763572	28764572
Chr1	28764127	28765127
Chr1	28832110	28833110
Chr1	28844537	28845537
Chr1	28845007	28846007
Chr1	28878930	28879930
Chr1	28907306	28908306
Chr1	28907940	28908940
Chr1	28916363	28917363
Chr1	28917915	28918915
Chr1	28968560	28969560
Chr1	28969238	28970238
Chr1	28974788	28975788
Chr1	28994316	28995316
Chr1	28995526	28996526
Chr1	28996033	28997033
Chr1	29041283	29042283
Chr1	29063112	29064112
Chr1	29070492	29071492
Chr1	29075667	29076667
Chr1	29101309	29102309
Chr1	29105977	29106977
Chr1	29201324	29202324
Chr1	29210174	29211174
Chr1	29210765	29211765
Chr1	29212969	29213969
Chr1	29213593	29214593
Chr1	29214412	29215412
Chr1	29240389	29241389
Chr1	29241018	29242018
Chr1	29503957	29504957
Chr1	29507956	29508956
Chr1	29528326	29529326
Chr1	29528984	29529984
Chr1	29556957	29557957
Chr1	30184408	30185408
Chr1	30184815	30185815
Chr1	30265522	30266522
Chr1	30369546	30370546
Chr1	30457585	30458585
Chr1	30603087	30604087
Chr1	30663681	30664681
Chr1	31191134	31192134
Chr1	31202878	31203878
Chr1	31204837	31205837
Chr1	31205987	31206987
Chr1	31216146	31217146
Chr1	31218276	31219276
Chr1	31219952	31220952
Chr1	31220920	31221920
Chr1	31222270	31223270
Chr1	31226120	31227120
Chr1	31229738	31230738
Chr1	31233780	31234780
Chr1	31235833	31236833
Chr1	31254867	31255867
Chr1	31255876	31256876
Chr1	31264415	31265415
Chr1	31274275	31275275
Chr1	31278156	31279156
Chr1	31296698	31297698
Chr1	31313434	31314434
Chr1	31350072	31351072
Chr1	31364240	31365240
Chr1	31384623	31385623
Chr1	31385514	31386514
Chr1	31391584	31392584
Chr1	31401988	31402988
Chr1	31444003	31445003
Chr1	31448665	31449665
Chr1	31455446	31456446
Chr1	31486055	31487055
Chr1	31500640	31501640
Chr1	31537590	31538590
Chr1	31538178	31539178
Chr1	31573046	31574046
Chr1	31574940	31575940
Chr1	31582128	31583128
Chr1	31583759	31584759
Chr1	31627066	31628066
Chr1	31627730	31628730
Chr1	31635195	31636195
Chr1	31643290	31644290
Chr1	31681123	31682123
Chr1	31769268	31770268
Chr1	31769828	31770828
Chr1	31870149	31871149
Chr1	31885236	31886236
Chr1	31955460	31956460
Chr1	31955919	31956919
Chr1	31971233	31972233
Chr1	31986118	31987118
Chr1	31989378	31990378
Chr1	32000833	32001833
Chr1	32001333	32002333
Chr1	32003179	32004179
Chr1	32014862	32015862
Chr1	32038041	32039041
Chr1	32070756	32071756
Chr1	32090891	32091891
Chr1	32104854	32105854
Chr1	32109981	32110981
Chr1	32166332	32167332
Chr1	32180895	32181895
Chr1	32226212	32227212
Chr1	32227930	32228930
Chr1	32253582	32254582
Chr1	32254196	32255196
Chr1	32254741	32255741
Chr1	32292064	32293064
Chr1	32352179	32353179
Chr1	32354468	32355468
Chr1	32369632	32370632
Chr1	32370044	32371044
Chr1	32385944	32386944
Chr1	32391562	32392562
Chr1	32397789	32398789
Chr1	32401907	32402907
Chr1	32402567	32403567
Chr1	32404190	32405190
Chr1	32405158	32406158
Chr1	32407320	32408320
Chr1	32409480	32410480
Chr1	32410056	32411056
Chr1	32419920	32420920
Chr1	32420985	32421985
Chr1	32421397	32422397
Chr1	32425263	32426263
Chr1	32426351	32427351
Chr1	32426873	32427873
Chr1	32429384	32430384
Chr1	32446138	32447138
Chr1	32446796	32447796
Chr1	32447332	32448332
Chr1	32470717	32471717
Chr1	32472315	32473315
Chr1	32478810	32479810
Chr1	32479600	32480600
Chr1	32511079	32512079
Chr1	32531717	32532717
Chr1	32537497	32538497
Chr1	32538117	32539117
Chr1	32541069	32542069
Chr1	32572204	32573204
Chr1	32573162	32574162
Chr1	32573816	32574816
Chr1	32574643	32575643
Chr1	32644463	32645463
Chr1	32644903	32645903
Chr1	32645541	32646541
Chr1	32665355	32666355
Chr1	32666375	32667375
Chr1	32670662	32671662
Chr1	32680877	32681877
Chr1	32687116	32688116
Chr1	32687924	32688924
Chr1	32705945	32706945
Chr1	32706592	32707592
Chr1	32756413	32757413
Chr1	32757205	32758205
Chr1	32800463	32801463
Chr1	32802132	32803132
Chr1	32802812	32803812
Chr1	32804823	32805823
Chr1	32805265	32806265
Chr1	32807309	32808309
Chr1	32814442	32815442
Chr1	32816606	32817606
Chr1	32819196	32820196
Chr1	32830084	32831084
Chr1	32858459	32859459
Chr1	32859110	32860110
Chr1	32859613	32860613
Chr1	32860203	32861203
Chr1	33001408	33002408
Chr1	33102547	33103547
Chr1	33115179	33116179
Chr1	33115880	33116880
Chr1	33116591	33117591
Chr1	33176534	33177534
Chr1	33190446	33191446
Chr1	33207171	33208171
Chr1	33207591	33208591
Chr1	33219732	33220732
Chr1	33281608	33282608
Chr1	33282302	33283302
Chr1	33386001	33387001
Chr1	33406870	33407870
Chr1	33416409	33417409
Chr1	33427622	33428622
Chr1	33428361	33429361
Chr1	33429071	33430071
Chr1	33446237	33447237
Chr1	33446887	33447887
Chr1	33449482	33450482
Chr1	33449987	33450987
Chr1	33454611	33455611
Chr1	33456749	33457749
Chr1	33457767	33458767
Chr1	33459505	33460505
Chr1	33463282	33464282
Chr1	33463706	33464706
Chr1	33472504	33473504
Chr1	33489965	33490965
Chr1	33495869	33496869
Chr1	33496831	33497831
Chr1	33500227	33501227
Chr1	33501204	33502204
Chr1	33501775	33502775
Chr1	33505147	33506147
Chr1	33514601	33515601
Chr1	33515625	33516625
Chr1	33520416	33521416
Chr1	33521020	33522020
Chr1	33647181	33648181
Chr1	33683944	33684944
Chr1	33720694	33721694
Chr1	33721622	33722622
Chr1	33722100	33723100
Chr1	33760792	33761792
Chr1	33792160	33793160
Chr1	33793204	33794204
Chr1	33800319	33801319
Chr1	33804181	33805181
Chr1	33807456	33808456
Chr1	33812233	33813233
Chr1	33814409	33815409
Chr1	33815118	33816118
Chr1	33815525	33816525
Chr1	33826896	33827896
Chr1	33832726	33833726
Chr1	33886529	33887529
Chr1	33898281	33899281
Chr1	33898988	33899988
Chr1	33920849	33921849
Chr1	34098301	34099301
Chr1	35317966	35318966
Chr1	35323726	35324726
Chr1	35324237	35325237
Chr1	35332716	35333716
Chr1	35384437	35385437
Chr1	35450460	35451460
Chr1	35496781	35497781
Chr1	35527398	35528398
Chr1	35528123	35529123
Chr1	35544535	35545535
Chr1	35657180	35658180
Chr1	35657712	35658712
Chr1	35730200	35731200
Chr1	35733755	35734755
Chr1	35735017	35736017
Chr1	35810654	35811654
Chr1	35830049	35831049
Chr1	35876623	35877623
Chr1	35877570	35878570
Chr1	35894555	35895555
Chr1	35908164	35909164
Chr1	35912560	35913560
Chr1	35913756	35914756
Chr1	35917369	35918369
Chr1	35919656	35920656
Chr1	36022732	36023732
Chr1	36023347	36024347
Chr1	36041367	36042367
Chr1	36042552	36043552
Chr1	36106667	36107667
Chr1	36184148	36185148
Chr1	36234546	36235546
Chr1	36235135	36236135
Chr1	36268863	36269863
Chr1	36271913	36272913
Chr1	36272735	36273735
Chr1	36274159	36275159
Chr1	36276465	36277465
Chr1	36303083	36304083
Chr1	36303959	36304959
Chr1	36325963	36326963
Chr1	36330105	36331105
Chr1	36348222	36349222
Chr1	36348652	36349652
Chr1	36349134	36350134
Chr1	36350233	36351233
Chr1	36352352	36353352
Chr1	36359436	36360436
Chr1	36395629	36396629
Chr1	36396346	36397346
Chr1	36397032	36398032
Chr1	36402134	36403134
Chr1	36408042	36409042
Chr1	36500011	36501011
Chr1	36521029	36522029
Chr1	36549397	36550397
Chr1	36554005	36555005
Chr1	36554423	36555423
Chr1	36554836	36555836
Chr1	36561059	36562059
Chr1	36581158	36582158
Chr1	36584823	36585823
Chr1	36585354	36586354
Chr1	36587965	36588965
Chr1	36590876	36591876
Chr1	36600106	36601106
Chr1	36614665	36615665
Chr1	36615515	36616515
Chr1	36618133	36619133
Chr1	36620904	36621904
Chr1	36624599	36625599
Chr1	36626327	36627327
Chr1	36627553	36628553
Chr1	36668828	36669828
Chr1	36688370	36689370
Chr1	36689523	36690523
Chr1	36713616	36714616
Chr1	36765219	36766219
Chr1	36765840	36766840
Chr1	36769810	36770810
Chr1	36771585	36772585
Chr1	36785676	36786676
Chr1	36786881	36787881
Chr1	36788028	36789028
Chr1	36808113	36809113
Chr1	36814552	36815552
Chr1	36815637	36816637
Chr1	36816693	36817693
Chr1	36830597	36831597
Chr1	36831678	36832678
Chr1	36836719	36837719
Chr1	36838943	36839943
Chr1	36839886	36840886
Chr1	36843186	36844186
Chr1	36843893	36844893
Chr1	36850172	36851172
Chr1	36851900	36852900
Chr1	36855028	36856028
Chr1	36862831	36863831
Chr1	36866262	36867262
Chr1	36885635	36886635
Chr1	36886039	36887039
Chr1	36911665	36912665
Chr1	36915081	36916081
Chr1	36915525	36916525
Chr1	36922714	36923714
Chr1	36923927	36924927
Chr1	36929837	36930837
Chr1	36931543	36932543
Chr1	36939411	36940411
Chr1	36947575	36948575
Chr1	36948016	36949016
Chr1	36971875	36972875
Chr1	37920297	37921297
Chr1	37936983	37937983
Chr1	37939256	37940256
Chr1	37939656	37940656
Chr1	37940189	37941189
Chr1	37941829	37942829
Chr1	37942518	37943518
Chr1	37943294	37944294
Chr1	37944926	37945926
Chr1	37945543	37946543
Chr1	37946773	37947773
Chr1	37979998	37980998
Chr1	37999750	38000750
Chr1	38060062	38061062
Chr1	38061017	38062017
Chr1	38154967	38155967
Chr1	38157246	38158246
Chr1	38272867	38273867
Chr1	38273399	38274399
Chr1	38276416	38277416
Chr1	38285242	38286242
Chr1	38286859	38287859
Chr1	38288298	38289298
Chr1	38288865	38289865
Chr1	38290862	38291862
Chr1	38311189	38312189
Chr1	38312144	38313144
Chr1	38317169	38318169
Chr1	38324874	38325874
Chr1	38325512	38326512
Chr1	38366524	38367524
Chr1	38388167	38389167
Chr1	38397040	38398040
Chr1	38405754	38406754
Chr1	38411111	38412111
Chr1	38454753	38455753
Chr1	38455309	38456309
Chr1	38461348	38462348
Chr1	38461830	38462830
Chr1	38464589	38465589
Chr1	38465207	38466207
Chr1	38466629	38467629
Chr1	38469791	38470791
Chr1	38474590	38475590
Chr1	38477912	38478912
Chr1	38478372	38479372
Chr1	38495332	38496332
Chr1	38638437	38639437
Chr1	38958719	38959719
Chr1	39313461	39314461
Chr1	39323571	39324571
Chr1	39324212	39325212
Chr1	39324635	39325635
Chr1	39325042	39326042
Chr1	39337947	39338947
Chr1	39338639	39339639
Chr1	39456398	39457398
Chr1	39457475	39458475
Chr1	39491447	39492447
Chr1	39492064	39493064
Chr1	39510149	39511149
Chr1	39513140	39514140
Chr1	39529154	39530154
Chr1	39530090	39531090
Chr1	39568287	39569287
Chr1	39570511	39571511
Chr1	39571313	39572313
Chr1	39649107	39650107
Chr1	39657521	39658521
Chr1	39662260	39663260
Chr1	39670125	39671125
Chr1	39670526	39671526
Chr1	39680335	39681335
Chr1	39680924	39681924
Chr1	39695944	39696944
Chr1	39863942	39864942
Chr1	39872847	39873847
Chr1	39873980	39874980
Chr1	39875288	39876288
Chr1	39954125	39955125
Chr1	39995502	39996502
Chr1	40005172	40006172
Chr1	40005994	40006994
Chr1	40006734	40007734
Chr1	40009711	40010711
Chr1	40024565	40025565
Chr1	40040940	40041940
Chr1	40042023	40043023
Chr1	40074378	40075378
Chr1	40074982	40075982
Chr1	40203997	40204997
Chr1	40254090	40255090
Chr1	40264421	40265421
Chr1	40269070	40270070
Chr1	40269578	40270578
Chr1	40282736	40283736
Chr1	40283840	40284840
Chr1	40290688	40291688
Chr1	40298937	40299937
Chr1	40299364	40300364
Chr1	40307774	40308774
Chr1	40308432	40309432
Chr1	40308883	40309883
Chr1	40311106	40312106
Chr1	40355658	40356658
Chr1	40366338	40367338
Chr1	40367048	40368048
Chr1	40367554	40368554
Chr1	40370569	40371569
Chr1	40372854	40373854
Chr1	40391708	40392708
Chr1	40392875	40393875
Chr1	40399805	40400805
Chr1	40402095	40403095
Chr1	40405672	40406672
Chr1	40419779	40420779
Chr1	40420272	40421272
Chr1	40420921	40421921
Chr1	40425890	40426890
Chr1	40430397	40431397
Chr1	40434448	40435448
Chr1	40446324	40447324
Chr1	40479572	40480572
Chr1	40500315	40501315
Chr1	40504056	40505056
Chr1	40505128	40506128
Chr1	40505787	40506787
Chr1	40511077	40512077
Chr1	40511818	40512818
Chr1	40524813	40525813
Chr1	40525464	40526464
Chr1	40530230	40531230
Chr1	40532384	40533384
Chr1	40540643	40541643
Chr1	40542248	40543248
Chr1	40545471	40546471
Chr1	40547232	40548232
Chr1	40550061	40551061
Chr1	40558410	40559410
Chr1	40559840	40560840
Chr1	40561112	40562112
Chr1	40562130	40563130
Chr1	40618432	40619432
Chr1	40620490	40621490
Chr1	40626743	40627743
Chr1	40706642	40707642
Chr1	40707100	40708100
Chr1	40723090	40724090
Chr1	40777784	40778784
Chr1	40780602	40781602
Chr1	40804244	40805244
[truncated: 71,614 more rows]

## Sheet: silencers in HepG2
Chromosome	start	end
Chr1	235257	236257
Chr1	237269	238269
Chr1	564990	565990
Chr1	565460	566460
Chr1	566069	567069
Chr1	566502	567502
Chr1	567179	568179
Chr1	569338	570338
Chr1	790038	791038
Chr1	793700	794700
Chr1	838988	839988
Chr1	847901	848901
Chr1	848076	849076
Chr1	851512	852512
Chr1	851991	852991
Chr1	854686	855686
Chr1	856127	857127
Chr1	857552	858552
Chr1	858099	859099
Chr1	872569	873569
Chr1	873137	874137
Chr1	874582	875582
Chr1	886146	887146
Chr1	914554	915554
Chr1	931868	932868
Chr1	932170	933170
Chr1	938529	939529
Chr1	939508	940508
Chr1	939876	940876
Chr1	949012	950012
Chr1	957767	958767
Chr1	988799	989799
Chr1	989350	990350
Chr1	991362	992362
Chr1	1001525	1002525
Chr1	1057159	1058159
Chr1	1057871	1058871
Chr1	1058162	1059162
Chr1	1062361	1063361
Chr1	1064418	1065418
Chr1	1067493	1068493
Chr1	1080103	1081103
Chr1	1106575	1107575
Chr1	1138786	1139786
Chr1	1150892	1151892
Chr1	1153442	1154442
Chr1	1154354	1155354
Chr1	1160417	1161417
Chr1	1164852	1165852
Chr1	1169510	1170510
Chr1	1171256	1172256
Chr1	1172245	1173245
Chr1	1174339	1175339
Chr1	1175895	1176895
Chr1	1185598	1186598
Chr1	1192267	1193267
Chr1	1207420	1208420
Chr1	1219853	1220853
Chr1	1220964	1221964
Chr1	1225241	1226241
Chr1	1225425	1226425
Chr1	1236962	1237962
Chr1	1264429	1265429
Chr1	1265212	1266212
Chr1	1266176	1267176
Chr1	1269042	1270042
Chr1	1275721	1276721
Chr1	1281274	1282274
Chr1	1281985	1282985
Chr1	1287080	1288080
Chr1	1292052	1293052
Chr1	1354317	1355317
Chr1	1371971	1372971
Chr1	1377047	1378047
Chr1	1414970	1415970
Chr1	1472794	1473794
Chr1	1482391	1483391
Chr1	1489752	1490752
Chr1	1497874	1498874
Chr1	1536133	1537133
Chr1	1555029	1556029
Chr1	1596177	1597177
Chr1	1614985	1615985
Chr1	1679832	1680832
Chr1	1684416	1685416
Chr1	1690923	1691923
Chr1	1823303	1824303
Chr1	1832421	1833421
Chr1	1832570	1833570
Chr1	1837395	1838395
Chr1	1854117	1855117
Chr1	1855601	1856601
Chr1	1873595	1874595
Chr1	1875067	1876067
Chr1	1877136	1878136
Chr1	1895108	1896108
Chr1	1913333	1914333
Chr1	1915825	1916825
Chr1	1917756	1918756
Chr1	1940461	1941461
Chr1	1979480	1980480
Chr1	1988289	1989289
Chr1	2039380	2040380
Chr1	2039607	2040607
Chr1	2039724	2040724
Chr1	2063370	2064370
Chr1	2067067	2068067
Chr1	2070970	2071970
Chr1	2091660	2092660
Chr1	2094024	2095024
Chr1	2105265	2106265
Chr1	2119180	2120180
Chr1	2121589	2122589
Chr1	2121800	2122800
Chr1	2130413	2131413
Chr1	2140518	2141518
Chr1	2147635	2148635
Chr1	2168160	2169160
Chr1	2168811	2169811
Chr1	2241766	2242766
Chr1	2242097	2243097
Chr1	2243751	2244751
Chr1	2244002	2245002
Chr1	2246929	2247929
Chr1	2247164	2248164
Chr1	2257631	2258631
Chr1	2258601	2259601
Chr1	2258773	2259773
Chr1	2313634	2314634
Chr1	2332476	2333476
Chr1	2380985	2381985
Chr1	2382967	2383967
Chr1	2424662	2425662
Chr1	2441048	2442048
Chr1	2456410	2457410
Chr1	2458235	2459235
Chr1	2476610	2477610
Chr1	2480315	2481315
Chr1	2486014	2487014
Chr1	2501345	2502345
Chr1	2514936	2515936
Chr1	2537923	2538923
Chr1	2573070	2574070
Chr1	2583353	2584353
Chr1	2583563	2584563
Chr1	2583976	2584976
Chr1	2584421	2585421
Chr1	2585917	2586917
Chr1	2586820	2587820
Chr1	2587209	2588209
Chr1	2612053	2613053
Chr1	2614417	2615417
Chr1	2615122	2616122
Chr1	2615457	2616457
Chr1	2615881	2616881
Chr1	2618314	2619314
Chr1	2619127	2620127
Chr1	2620265	2621265
Chr1	2621634	2622634
Chr1	2627594	2628594
Chr1	2628769	2629769
Chr1	2629291	2630291
Chr1	2629513	2630513
Chr1	2629820	2630820
Chr1	2629955	2630955
Chr1	2630599	2631599
Chr1	2630989	2631989
Chr1	2688704	2689704
Chr1	2717845	2718845
Chr1	2838287	2839287
Chr1	2982499	2983499
Chr1	3033985	3034985
Chr1	3063276	3064276
Chr1	3086811	3087811
Chr1	3102287	3103287
Chr1	3146108	3147108
Chr1	3151196	3152196
Chr1	3153173	3154173
Chr1	3187660	3188660
Chr1	3238213	3239213
Chr1	3238341	3239341
Chr1	3240479	3241479
Chr1	3240798	3241798
Chr1	3240973	3241973
Chr1	3242897	3243897
Chr1	3246685	3247685
Chr1	3263578	3264578
Chr1	3265382	3266382
Chr1	3265653	3266653
Chr1	3267219	3268219
Chr1	3267629	3268629
Chr1	3293851	3294851
Chr1	3294045	3295045
Chr1	3326376	3327376
Chr1	3347503	3348503
Chr1	3347699	3348699
Chr1	3368994	3369994
Chr1	3369395	3370395
Chr1	3372061	3373061
Chr1	3374394	3375394
Chr1	3385685	3386685
Chr1	3387040	3388040
Chr1	3395357	3396357
Chr1	3395818	3396818
Chr1	3395982	3396982
Chr1	3396367	3397367
Chr1	3397781	3398781
Chr1	3397912	3398912
Chr1	3408232	3409232
Chr1	3408516	3409516
Chr1	3415927	3416927
Chr1	3418340	3419340
Chr1	3426943	3427943
Chr1	3449374	3450374
Chr1	3449730	3450730
Chr1	3481494	3482494
Chr1	3491921	3492921
Chr1	3492153	3493153
Chr1	3492309	3493309
Chr1	3493383	3494383
Chr1	3511241	3512241
Chr1	3511634	3512634
Chr1	3513069	3514069
Chr1	3528324	3529324
Chr1	3531429	3532429
Chr1	3534201	3535201
Chr1	3535169	3536169
Chr1	3548945	3549945
Chr1	3586195	3587195
Chr1	3611927	3612927
Chr1	3643552	3644552
Chr1	3679231	3680231
Chr1	3693801	3694801
Chr1	3694025	3695025
Chr1	3694321	3695321
Chr1	3695174	3696174
Chr1	3695868	3696868
Chr1	3705592	3706592
Chr1	3774650	3775650
Chr1	3784962	3785962
Chr1	3827100	3828100
Chr1	4210079	4211079
Chr1	4279574	4280574
Chr1	4325572	4326572
Chr1	4330701	4331701
Chr1	4644990	4645990
Chr1	4654126	4655126
Chr1	5569614	5570614
Chr1	5574305	5575305
Chr1	5727118	5728118
Chr1	5890478	5891478
Chr1	6016146	6017146
Chr1	6040164	6041164
Chr1	6052965	6053965
Chr1	6061674	6062674
Chr1	6062748	6063748
Chr1	6086548	6087548
Chr1	6101197	6102197
Chr1	6165459	6166459
Chr1	6168578	6169578
Chr1	6185795	6186795
Chr1	6193376	6194376
Chr1	6231345	6232345
Chr1	6245515	6246515
Chr1	6298394	6299394
Chr1	6307968	6308968
Chr1	6389500	6390500
Chr1	6407742	6408742
Chr1	6409046	6410046
Chr1	6451818	6452818
Chr1	6474081	6475081
Chr1	6497102	6498102
Chr1	6497778	6498778
Chr1	6504850	6505850
Chr1	6505078	6506078
Chr1	6516930	6517930
Chr1	6524057	6525057
Chr1	6524637	6525637
Chr1	6546149	6547149
Chr1	6551725	6552725
Chr1	6552008	6553008
Chr1	6571470	6572470
Chr1	6572648	6573648
Chr1	6590395	6591395
Chr1	6636255	6637255
Chr1	6647007	6648007
Chr1	6647117	6648117
Chr1	6647224	6648224
Chr1	6652609	6653609
Chr1	6652957	6653957
Chr1	6806815	6807815
Chr1	7267665	7268665
Chr1	7284395	7285395
Chr1	7394712	7395712
Chr1	7534586	7535586
Chr1	7576165	7577165
Chr1	7676089	7677089
Chr1	7705227	7706227
Chr1	7780472	7781472
Chr1	7916111	7917111
Chr1	7945450	7946450
Chr1	8034998	8035998
Chr1	8042067	8043067
Chr1	8070820	8071820
Chr1	8261943	8262943
Chr1	8272362	8273362
Chr1	8297725	8298725
Chr1	8317360	8318360
Chr1	8334151	8335151
Chr1	8336262	8337262
Chr1	8373675	8374675
Chr1	8374089	8375089
Chr1	8374676	8375676
Chr1	8389334	8390334
Chr1	8402053	8403053
Chr1	8409181	8410181
Chr1	8410543	8411543
Chr1	8411628	8412628
Chr1	8411794	8412794
Chr1	8418882	8419882
Chr1	8423616	8424616
Chr1	8524050	8525050
Chr1	8585576	8586576
Chr1	8882363	8883363
Chr1	8885727	8886727
Chr1	8885862	8886862
Chr1	8969386	8970386
Chr1	9022818	9023818
Chr1	9064464	9065464
Chr1	9128983	9129983
Chr1	9170913	9171913
Chr1	9187220	9188220
Chr1	9202898	9203898
Chr1	9241080	9242080
Chr1	9256166	9257166
Chr1	9256447	9257447
Chr1	9354046	9355046
Chr1	9384789	9385789
Chr1	9497879	9498879
Chr1	9498783	9499783
Chr1	9498973	9499973
Chr1	9499177	9500177
Chr1	9501156	9502156
Chr1	9515549	9516549
Chr1	9515790	9516790
Chr1	9590839	9591839
Chr1	9649758	9650758
Chr1	9664273	9665273
Chr1	9675170	9676170
Chr1	9736644	9737644
Chr1	9760156	9761156
Chr1	9775261	9776261
Chr1	9778591	9779591
Chr1	9885056	9886056
Chr1	9887446	9888446
Chr1	9895036	9896036
Chr1	9895148	9896148
Chr1	9895507	9896507
Chr1	9895752	9896752
Chr1	9927206	9928206
Chr1	10227728	10228728
Chr1	10264090	10265090
Chr1	10554390	10555390
Chr1	10694721	10695721
Chr1	10701751	10702751
Chr1	10702418	10703418
Chr1	10707126	10708126
Chr1	10708080	10709080
Chr1	10708428	10709428
Chr1	10743346	10744346
Chr1	10743983	10744983
Chr1	10755446	10756446
Chr1	10848264	10849264
Chr1	10848449	10849449
Chr1	11001707	11002707
Chr1	11035550	11036550
Chr1	11097560	11098560
Chr1	11379949	11380949
Chr1	11610427	11611427
Chr1	11715295	11716295
Chr1	11715406	11716406
Chr1	11718306	11719306
Chr1	11767395	11768395
Chr1	11779303	11780303
Chr1	11789513	11790513
Chr1	11797840	11798840
Chr1	11821721	11822721
Chr1	11822889	11823889
Chr1	11825573	11826573
Chr1	11863243	11864243
Chr1	11901857	11902857
Chr1	11943054	11944054
Chr1	11958621	11959621
Chr1	11984750	11985750
Chr1	12017156	12018156
Chr1	12023872	12024872
Chr1	12091010	12092010
Chr1	12091157	12092157
Chr1	12587419	12588419
Chr1	12600881	12601881
Chr1	12611721	12612721
Chr1	12612375	12613375
Chr1	12615188	12616188
Chr1	12618633	12619633
Chr1	12660949	12661949
Chr1	12661087	12662087
Chr1	12661670	12662670
Chr1	12669156	12670156
Chr1	12718697	12719697
Chr1	14137430	14138430
Chr1	14155014	14156014
Chr1	14292003	14293003
Chr1	14964135	14965135
Chr1	15247061	15248061
Chr1	15426549	15427549
Chr1	15438411	15439411
Chr1	15457956	15458956
Chr1	15464243	15465243
Chr1	15503344	15504344
Chr1	15533629	15534629
Chr1	15547233	15548233
Chr1	15547430	15548430
Chr1	15549317	15550317
Chr1	15587336	15588336
Chr1	15598619	15599619
Chr1	15622762	15623762
Chr1	15627495	15628495
Chr1	15747236	15748236
Chr1	15753554	15754554
Chr1	15757300	15758300
Chr1	15903885	15904885
Chr1	15922989	15923989
Chr1	16009109	16010109
Chr1	16052383	16053383
Chr1	16065930	16066930
Chr1	16082458	16083458
Chr1	16091773	16092773
Chr1	16125731	16126731
Chr1	16323359	16324359
Chr1	16332308	16333308
Chr1	16335206	16336206
Chr1	16340910	16341910
Chr1	16345616	16346616
Chr1	16348606	16349606
Chr1	16351155	16352155
Chr1	16354153	16355153
Chr1	16355828	16356828
Chr1	16358983	16359983
Chr1	16383555	16384555
Chr1	16384342	16385342
Chr1	16403967	16404967
Chr1	16405478	16406478
Chr1	16408552	16409552
Chr1	16438089	16439089
Chr1	16445459	16446459
Chr1	16473459	16474459
Chr1	16474690	16475690
Chr1	16478954	16479954
Chr1	16491107	16492107
Chr1	16491579	16492579
Chr1	16491797	16492797
Chr1	16502634	16503634
Chr1	16513825	16514825
Chr1	16531234	16532234
Chr1	16532032	16533032
Chr1	16546314	16547314
Chr1	16546444	16547444
Chr1	16567493	16568493
Chr1	16568389	16569389
Chr1	16570482	16571482
Chr1	16735704	16736704
Chr1	16839552	16840552
Chr1	16839822	16840822
Chr1	16862083	16863083
Chr1	16892239	16893239
Chr1	16933542	16934542
Chr1	16934488	16935488
Chr1	16943250	16944250
Chr1	16944886	16945886
Chr1	16950308	16951308
Chr1	16952550	16953550
Chr1	16954412	16955412
Chr1	16954564	16955564
Chr1	16969282	16970282
Chr1	17017585	17018585
Chr1	17035972	17036972
Chr1	17036430	17037430
Chr1	17050231	17051231
Chr1	17053851	17054851
Chr1	17090476	17091476
Chr1	17196739	17197739
Chr1	17238044	17239044
Chr1	17238225	17239225
Chr1	17241034	17242034
Chr1	17297433	17298433
Chr1	17385808	17386808
Chr1	17452417	17453417
Chr1	17565612	17566612
Chr1	17565937	17566937
Chr1	17820396	17821396
Chr1	17899873	17900873
Chr1	17900726	17901726
Chr1	17973076	17974076
Chr1	17987783	17988783
Chr1	18071340	18072340
Chr1	18398865	18399865
Chr1	18475221	18476221
Chr1	18648653	18649653
Chr1	18901629	18902629
Chr1	18901759	18902759
Chr1	19146703	19147703
Chr1	19146934	19147934
Chr1	19201396	19202396
Chr1	19201579	19202579
Chr1	19210339	19211339
Chr1	19230790	19231790
Chr1	19233226	19234226
Chr1	19234558	19235558
Chr1	19258038	19259038
Chr1	19273881	19274881
Chr1	19275844	19276844
Chr1	19289305	19290305
Chr1	19315553	19316553
Chr1	19334403	19335403
Chr1	19336029	19337029
Chr1	19336497	19337497
Chr1	19336675	19337675
Chr1	19372963	19373963
Chr1	19388820	19389820
Chr1	19396326	19397326
Chr1	19439839	19440839
Chr1	19637391	19638391
Chr1	19641959	19642959
Chr1	19657611	19658611
Chr1	19667641	19668641
Chr1	19670591	19671591
Chr1	19810405	19811405
Chr1	19810547	19811547
Chr1	19985943	19986943
Chr1	20041829	20042829
Chr1	20098207	20099207
Chr1	20137397	20138397
Chr1	20140793	20141793
Chr1	20151420	20152420
Chr1	20287734	20288734
Chr1	20305703	20306703
Chr1	20521359	20522359
Chr1	20703058	20704058
Chr1	20737316	20738316
Chr1	20756613	20757613
Chr1	20803527	20804527
Chr1	20807233	20808233
Chr1	20808322	20809322
Chr1	20818035	20819035
Chr1	20819871	20820871
Chr1	20820445	20821445
Chr1	20848603	20849603
Chr1	20877594	20878594
Chr1	20901394	20902394
Chr1	20913803	20914803
Chr1	20915634	20916634
Chr1	20915804	20916804
Chr1	20915920	20916920
Chr1	21022800	21023800
Chr1	21028429	21029429
Chr1	21057219	21058219
Chr1	21543614	21544614
Chr1	21543900	21544900
Chr1	21544044	21545044
Chr1	21660431	21661431
Chr1	21664076	21665076
Chr1	21670727	21671727
Chr1	21696921	21697921
Chr1	21814913	21815913
Chr1	21946202	21947202
Chr1	21965743	21966743
Chr1	21965876	21966876
Chr1	22174777	22175777
Chr1	22262162	22263162
Chr1	22265763	22266763
Chr1	22290154	22291154
Chr1	22455772	22456772
Chr1	22602030	22603030
Chr1	22677946	22678946
Chr1	22695651	22696651
Chr1	22706464	22707464
Chr1	22924847	22925847
Chr1	22937693	22938693
Chr1	22968163	22969163
Chr1	23030504	23031504
Chr1	23030649	23031649
Chr1	23302649	23303649
Chr1	23302897	23303897
Chr1	23551242	23552242
Chr1	23730046	23731046
Chr1	23748604	23749604
Chr1	23866008	23867008
Chr1	23870858	23871858
Chr1	23874932	23875932
Chr1	23881693	23882693
Chr1	23924417	23925417
Chr1	23961131	23962131
Chr1	23964284	23965284
Chr1	23973315	23974315
Chr1	23977290	23978290
Chr1	23983693	23984693
Chr1	23983872	23984872
Chr1	24098310	24099310
Chr1	24116542	24117542
Chr1	24124741	24125741
Chr1	24128036	24129036
Chr1	24136961	24137961
Chr1	24242984	24243984
Chr1	24435851	24436851
Chr1	24436999	24437999
Chr1	24438294	24439294
Chr1	24438630	24439630
Chr1	24443911	24444911
Chr1	24468704	24469704
Chr1	24469076	24470076
Chr1	24476274	24477274
Chr1	24525611	24526611
Chr1	24528285	24529285
Chr1	24742167	24743167
Chr1	24742330	24743330
Chr1	24805501	24806501
Chr1	24810221	24811221
Chr1	24902128	24903128
Chr1	24902326	24903326
Chr1	25014718	25015718
Chr1	25039671	25040671
Chr1	25044062	25045062
Chr1	25068555	25069555
Chr1	25069579	25070579
Chr1	25070080	25071080
Chr1	25183299	25184299
Chr1	25427607	25428607
Chr1	25443621	25444621
Chr1	25449031	25450031
Chr1	25524956	25525956
Chr1	25526173	25527173
Chr1	25898941	25899941
Chr1	25945219	25946219
Chr1	26089654	26090654
Chr1	26097723	26098723
Chr1	26123022	26124022
Chr1	26136826	26137826
Chr1	26137038	26138038
Chr1	26200804	26201804
Chr1	26241672	26242672
Chr1	26266329	26267329
Chr1	26347777	26348777
Chr1	26355619	26356619
Chr1	26392224	26393224
Chr1	26546118	26547118
Chr1	26647656	26648656
Chr1	26671994	26672994
Chr1	26678637	26679637
Chr1	26687390	26688390
Chr1	26690698	26691698
Chr1	26694478	26695478
Chr1	26734718	26735718
Chr1	26796457	26797457
Chr1	26877860	26878860
Chr1	27165990	27166990
Chr1	27178873	27179873
Chr1	27179819	27180819
Chr1	27237964	27238964
Chr1	27252335	27253335
Chr1	27271328	27272328
Chr1	27285751	27286751
Chr1	27322145	27323145
Chr1	27325089	27326089
Chr1	27325539	27326539
Chr1	27370922	27371922
Chr1	27428812	27429812
Chr1	27435506	27436506
Chr1	27559915	27560915
Chr1	27667879	27668879
Chr1	27668382	27669382
Chr1	27669244	27670244
Chr1	27679754	27680754
Chr1	27714523	27715523
Chr1	27717774	27718774
Chr1	27725429	27726429
Chr1	27731127	27732127
Chr1	27815352	27816352
Chr1	27847467	27848467
Chr1	27851679	27852679
Chr1	27854965	27855965
Chr1	27888238	27889238
Chr1	27932587	27933587
Chr1	27934811	27935811
Chr1	27935088	27936088
Chr1	27970082	27971082
Chr1	27995356	27996356
Chr1	28051190	28052190
Chr1	28184992	28185992
Chr1	28195294	28196294
Chr1	28199283	28200283
Chr1	28211519	28212519
Chr1	28833682	28834682
Chr1	28843370	28844370
Chr1	29203371	29204371
Chr1	29214188	29215188
Chr1	29470238	29471238
Chr1	29529117	29530117
Chr1	29795679	29796679
Chr1	30106330	30107330
Chr1	30578650	30579650
Chr1	30724980	30725980
Chr1	30852683	30853683
Chr1	31180633	31181633
Chr1	31218699	31219699
Chr1	31256116	31257116
Chr1	31274248	31275248
Chr1	31326684	31327684
Chr1	31401839	31402839
Chr1	31401989	31402989
Chr1	31624909	31625909
Chr1	31711121	31712121
Chr1	31849304	31850304
Chr1	31860172	31861172
Chr1	31904278	31905278
Chr1	31907584	31908584
Chr1	31909698	31910698
Chr1	31976538	31977538
Chr1	31979377	31980377
Chr1	32042188	32043188
Chr1	32042413	32043413
Chr1	32129123	32130123
Chr1	32164930	32165930
Chr1	32210895	32211895
Chr1	32280487	32281487
Chr1	32299817	32300817
Chr1	32313475	32314475
Chr1	32336955	32337955
Chr1	32443007	32444007
Chr1	32478204	32479204
Chr1	32644201	32645201
Chr1	32707767	32708767
Chr1	32712308	32713308
Chr1	32712839	32713839
Chr1	32716881	32717881
Chr1	32799666	32800666
Chr1	32799827	32800827
Chr1	32823112	32824112
Chr1	33174149	33175149
Chr1	33178450	33179450
Chr1	33205688	33206688
Chr1	33335025	33336025
Chr1	33341849	33342849
Chr1	33342100	33343100
Chr1	33349874	33350874
Chr1	33551659	33552659
Chr1	33557972	33558972
Chr1	33585124	33586124
Chr1	33621250	33622250
Chr1	33699760	33700760
Chr1	33699961	33700961
Chr1	33717058	33718058
Chr1	33724759	33725759
Chr1	33785554	33786554
Chr1	33830817	33831817
Chr1	33832977	33833977
Chr1	33921118	33922118
Chr1	33935808	33936808
Chr1	34128071	34129071
Chr1	34652878	34653878
Chr1	35063198	35064198
Chr1	35153641	35154641
Chr1	35383952	35384952
Chr1	36023859	36024859
Chr1	36034225	36035225
Chr1	36040272	36041272
Chr1	36156113	36157113
Chr1	36192125	36193125
Chr1	36553034	36554034
Chr1	36571938	36572938
Chr1	36591629	36592629
Chr1	36620369	36621369
Chr1	36688651	36689651
Chr1	36791811	36792811
Chr1	36792911	36793911
Chr1	36793139	36794139
Chr1	36807963	36808963
Chr1	37041355	37042355
Chr1	37074537	37075537
Chr1	37642539	37643539
Chr1	37920347	37921347
Chr1	37940767	37941767
Chr1	37942538	37943538
Chr1	37947017	37948017
Chr1	38076885	38077885
Chr1	38197518	38198518
Chr1	38411498	38412498
Chr1	38415102	38416102
Chr1	38419729	38420729
Chr1	38469301	38470301
Chr1	38552923	38553923
Chr1	39406405	39407405
Chr1	39406730	39407730
Chr1	39407078	39408078
Chr1	39564017	39565017
Chr1	39876234	39877234
Chr1	39972620	39973620
Chr1	40004527	40005527
Chr1	40123382	40124382
Chr1	40264569	40265569
Chr1	40281748	40282748
Chr1	40282148	40283148
Chr1	40282563	40283563
Chr1	40282789	40283789
Chr1	40438868	40439868
Chr1	40609327	40610327
Chr1	40769766	40770766
Chr1	41134153	41135153
Chr1	41174451	41175451
Chr1	41315340	41316340
Chr1	41380621	41381621
Chr1	41383621	41384621
Chr1	41417824	41418824
Chr1	41469074	41470074
Chr1	41733544	41734544
Chr1	41828279	41829279
Chr1	41878130	41879130
Chr1	42612002	42613002
Chr1	43212480	43213480
Chr1	43222332	43223332
Chr1	43393254	43394254
Chr1	43399869	43400869
Chr1	43400649	43401649
Chr1	43404075	43405075
Chr1	43426618	43427618
Chr1	43471173	43472173
Chr1	43501948	43502948
Chr1	43502137	43503137
Chr1	43534253	43535253
Chr1	43703658	43704658
Chr1	43742785	43743785
Chr1	43832403	43833403
Chr1	44013028	44014028
Chr1	44072074	44073074
Chr1	44087220	44088220
Chr1	44090968	44091968
Chr1	44171336	44172336
Chr1	44301837	44302837
Chr1	44489311	44490311
Chr1	44501217	44502217
Chr1	44686864	44687864
Chr1	44714909	44715909
Chr1	44843604	44844604
Chr1	45060301	45061301
Chr1	45060541	45061541
Chr1	45074911	45075911
Chr1	45118214	45119214
Chr1	45250355	45251355
Chr1	45256525	45257525
Chr1	45274903	45275903
Chr1	45301207	45302207
Chr1	45479839	45480839
Chr1	45761867	45762867
Chr1	45769964	45770964
Chr1	46009221	46010221
Chr1	46035417	46036417
Chr1	46035604	46036604
Chr1	46087060	46088060
Chr1	46502422	46503422
Chr1	46638853	46639853
Chr1	46640024	46641024
Chr1	46645529	46646529
Chr1	46912218	46913218
Chr1	47000443	47001443
Chr1	47012975	47013975
Chr1	47016453	47017453
Chr1	47200937	47201937
Chr1	47640619	47641619
Chr1	47644405	47645405
Chr1	47646376	47647376
Chr1	47656809	47657809
Chr1	47657096	47658096
Chr1	47690225	47691225
Chr1	47854080	47855080
Chr1	48191317	48192317
Chr1	48191628	48192628
Chr1	48232172	48233172
Chr1	48284917	48285917
Chr1	48336650	48337650
Chr1	48376730	48377730
Chr1	48376857	48377857
Chr1	48387492	48388492
Chr1	48559060	48560060
Chr1	48688702	48689702
Chr1	51761378	51762378
Chr1	51761656	51762656
Chr1	51762139	51763139
Chr1	52048940	52049940
Chr1	52830358	52831358
Chr1	53141991	53142991
Chr1	53369845	53370845
Chr1	53376980	53377980
Chr1	53559659	53560659
Chr1	53559908	53560908
Chr1	53574541	53575541
Chr1	53578787	53579787
Chr1	53585436	53586436
Chr1	53585637	53586637
Chr1	53620819	53621819
Chr1	53632257	53633257
Chr1	53638227	53639227
Chr1	53655673	53656673
Chr1	53676332	53677332
Chr1	53786707	53787707
Chr1	53794046	53795046
Chr1	53828691	53829691
Chr1	53950836	53951836
Chr1	53990824	53991824
Chr1	54143485	54144485
Chr1	54147451	54148451
Chr1	54180825	54181825
Chr1	54446600	54447600
Chr1	54456943	54457943
Chr1	54479519	54480519
Chr1	54483358	54484358
Chr1	54647063	54648063
Chr1	54694854	54695854
Chr1	54776350	54777350
Chr1	54820192	54821192
Chr1	54873576	54874576
Chr1	55046186	55047186
Chr1	55137373	55138373
Chr1	55275712	55276712
Chr1	55316852	55317852
Chr1	55410381	55411381
Chr1	55464084	55465084
Chr1	55487399	55488399
Chr1	55742709	55743709
Chr1	55742875	55743875
Chr1	55843978	55844978
Chr1	56916917	56917917
Chr1	57301065	57302065
Chr1	57381313	57382313
Chr1	58919572	58920572
Chr1	59437143	59438143
Chr1	60224854	60225854
Chr1	60436753	60437753
Chr1	60436887	60437887
Chr1	60746843	60747843
Chr1	62633112	62634112
Chr1	62751360	62752360
Chr1	62759601	62760601
Chr1	62792765	62793765
Chr1	63428547	63429547
Chr1	65327080	65328080
Chr1	65432543	65433543
Chr1	65432762	65433762
Chr1	66153284	66154284
Chr1	68027139	68028139
Chr1	71519815	71520815
Chr1	76262213	76263213
Chr1	76619705	76620705
Chr1	78510341	78511341
Chr1	85069638	85070638
Chr1	85744940	85745940
Chr1	85773424	85774424
Chr1	86043267	86044267
Chr1	86071081	86072081
Chr1	86071433	86072433
Chr1	87299003	87300003
Chr1	89507933	89508933
Chr1	91852465	91853465
Chr1	92311324	92312324
Chr1	92969145	92970145
Chr1	94057038	94058038
Chr1	94096893	94097893
Chr1	94166946	94167946
Chr1	94491089	94492089
Chr1	94504752	94505752
Chr1	94586632	94587632
Chr1	94586847	94587847
Chr1	95007604	95008604
Chr1	95017190	95018190
Chr1	95017461	95018461
Chr1	95086603	95087603
Chr1	95087863	95088863
Chr1	95179220	95180220
Chr1	95218928	95219928
Chr1	95319712	95320712
Chr1	105680791	105681791
Chr1	107599909	107600909
Chr1	108667810	108668810
Chr1	109104025	109105025
Chr1	109370427	109371427
Chr1	109372781	109373781
Chr1	109692274	109693274
Chr1	109692592	109693592
Chr1	109806009	109807009
Chr1	109811901	109812901
Chr1	109815504	109816504
Chr1	109818004	109819004
Chr1	109840952	109841952
Chr1	109842644	109843644
Chr1	110075141	110076141
Chr1	110170346	110171346
Chr1	110170930	110171930
Chr1	110173185	110174185
Chr1	110314398	110315398
Chr1	110315017	110316017
Chr1	110315968	110316968
Chr1	110319269	110320269
Chr1	110331305	110332305
Chr1	110332840	110333840
Chr1	110350674	110351674
Chr1	110434240	110435240
Chr1	110443249	110444249
Chr1	110446735	110447735
Chr1	110522962	110523962
Chr1	110580525	110581525
Chr1	110596124	110597124
Chr1	110630375	110631375
Chr1	110745284	110746284
Chr1	110750055	110751055
Chr1	110775987	110776987
Chr1	111066616	111067616
Chr1	111158062	111159062
Chr1	111322902	111323902
Chr1	111765175	111766175
Chr1	112264036	112265036
Chr1	112901085	112902085
Chr1	112911968	112912968
Chr1	112931852	112932852
Chr1	112931975	112932975
Chr1	113242095	113243095
Chr1	113243552	113244552
Chr1	113244732	113245732
Chr1	113248121	113249121
Chr1	113264431	113265431
Chr1	113351572	113352572
Chr1	113423252	113424252
Chr1	113499577	113500577
Chr1	113683197	113684197
Chr1	114654370	114655370
Chr1	114888158	114889158
Chr1	114895545	114896545
Chr1	115258409	115259409
Chr1	115681225	115682225
Chr1	116087996	116088996
Chr1	116259899	116260899
Chr1	116803409	116804409
Chr1	116994315	116995315
Chr1	116996352	116997352
Chr1	117002644	117003644
Chr1	118252974	118253974
Chr1	119502292	119503292
Chr1	119909801	119910801
Chr1	120217910	120218910
Chr1	120255917	120256917
Chr1	120269042	120270042
Chr1	121138655	121139655
Chr1	121370888	121371888
Chr1	121379055	121380055
Chr1	121381550	121382550
Chr1	121405336	121406336
Chr1	121435006	121436006
Chr1	121449545	121450545
Chr1	121458991	121459991
Chr1	121474355	121475355
Chr1	142792392	142793392
Chr1	143156802	143157802
Chr1	143278340	143279340
Chr1	143278532	143279532
Chr1	143279923	143280923
Chr1	143283149	143284149
Chr1	143670176	143671176
Chr1	143911532	143912532
Chr1	144534935	144535935
Chr1	144535125	144536125
Chr1	144859400	144860400
Chr1	144930250	144931250
Chr1	144992456	144993456
Chr1	145038510	145039510
Chr1	145524450	145525450
Chr1	145533125	145534125
Chr1	146695088	146696088
Chr1	146966459	146967459
Chr1	147013202	147014202
Chr1	147070348	147071348
Chr1	147171785	147172785
Chr1	147362029	147363029
Chr1	147726786	147727786
Chr1	147736743	147737743
Chr1	148929116	148930116
Chr1	148929398	148930398
Chr1	148931462	148932462
Chr1	149203980	149204980
Chr1	149297410	149298410
Chr1	149908228	149909228
Chr1	150134982	150135982
Chr1	150140848	150141848
Chr1	150228230	150229230
Chr1	150229674	150230674
Chr1	150230082	150231082
Chr1	150232030	150233030
Chr1	150436594	150437594
Chr1	150502701	150503701
Chr1	150502873	150503873
Chr1	150506256	150507256
Chr1	150507010	150508010
Chr1	150522291	150523291
Chr1	150522652	150523652
Chr1	150532141	150533141
Chr1	150534226	150535226
Chr1	150535168	150536168
Chr1	150996721	150997721
Chr1	151030167	151031167
Chr1	151263055	151264055
Chr1	151506909	151507909
Chr1	151803778	151804778
Chr1	151808608	151809608
Chr1	151985424	151986424
Chr1	152006714	152007714
Chr1	152024737	152025737
Chr1	152430573	152431573
Chr1	152432001	152433001
Chr1	153505857	153506857
Chr1	153507449	153508449
Chr1	153509255	153510255
Chr1	153510500	153511500
Chr1	153520301	153521301
Chr1	153581759	153582759
Chr1	153582523	153583523
Chr1	153600285	153601285
Chr1	153602531	153603531
Chr1	153620071	153621071
Chr1	153622104	153623104
Chr1	154165999	154166999
Chr1	154298362	154299362
Chr1	154317203	154318203
Chr1	154320556	154321556
Chr1	154390893	154391893
Chr1	154408642	154409642
Chr1	154414522	154415522
Chr1	154452005	154453005
Chr1	154641816	154642816
Chr1	154714001	154715001
Chr1	154850536	154851536
Chr1	154878773	154879773
Chr1	154895526	154896526
Chr1	154914497	154915497
Chr1	154915949	154916949
Chr1	154987745	154988745
Chr1	155002162	155003162
Chr1	155017032	155018032
Chr1	155051698	155052698
Chr1	155056258	155057258
Chr1	155056409	155057409
Chr1	155077690	155078690
Chr1	155080157	155081157
Chr1	155103470	155104470
Chr1	155138597	155139597
Chr1	155176719	155177719
Chr1	155210446	155211446
Chr1	155279170	155280170
Chr1	155291261	155292261
Chr1	155620595	155621595
Chr1	155837286	155838286
Chr1	155910657	155911657
Chr1	155914798	155915798
Chr1	155971038	155972038
Chr1	155989685	155990685
Chr1	155995404	155996404
Chr1	156060242	156061242
Chr1	156063279	156064279
Chr1	156066177	156067177
Chr1	156096313	156097313
Chr1	156106382	156107382
Chr1	156107827	156108827
Chr1	156109640	156110640
Chr1	156120106	156121106
Chr1	156123976	156124976
Chr1	156251176	156252176
Chr1	156336823	156337823
Chr1	156355059	156356059
Chr1	156355577	156356577
Chr1	156360219	156361219
Chr1	156360759	156361759
Chr1	156450203	156451203
Chr1	156467571	156468571
Chr1	156551147	156552147
Chr1	156554225	156555225
Chr1	156577591	156578591
Chr1	156607573	156608573
Chr1	156629534	156630534
Chr1	156630140	156631140
Chr1	156633940	156634940
Chr1	156643111	156644111
Chr1	156651580	156652580
Chr1	156658884	156659884
Chr1	156735650	156736650
Chr1	156736118	156737118
Chr1	156797839	156798839
Chr1	156808237	156809237
Chr1	157059569	157060569
Chr1	157123849	157124849
Chr1	157140317	157141317
Chr1	157163107	157164107
Chr1	157163253	157164253
Chr1	157163484	157164484
Chr1	157168228	157169228
Chr1	157475106	157476106
Chr1	158056836	158057836
Chr1	160022440	160023440
Chr1	160048053	160049053
Chr1	160056999	160057999
Chr1	160064508	160065508
Chr1	160066668	160067668
Chr1	160081974	160082974
Chr1	160086220	160087220
Chr1	160261243	160262243
Chr1	160749520	160750520
Chr1	161011100	161012100
Chr1	161017302	161018302
Chr1	161025915	161026915
Chr1	161043092	161044092
Chr1	161043968	161044968
Chr1	161044148	161045148
Chr1	161067172	161068172
Chr1	161161991	161162991
Chr1	161168376	161169376
Chr1	161171019	161172019
Chr1	161179259	161180259
Chr1	161195895	161196895
Chr1	161196759	161197759
Chr1	161196975	161197975
Chr1	161276576	161277576
Chr1	161378284	161379284
Chr1	161414237	161415237
Chr1	162167226	162168226
Chr1	162327232	162328232
Chr1	162666030	162667030
Chr1	162702179	162703179
Chr1	165361884	165362884
Chr1	167502431	167503431
Chr1	167502728	167503728
Chr1	167656610	167657610
Chr1	168061876	168062876
Chr1	168408722	168409722
Chr1	171613872	171614872
Chr1	171624291	171625291
Chr1	173174377	173175377
Chr1	173883425	173884425
Chr1	175115384	175116384
Chr1	175120858	175121858
Chr1	175288424	175289424
Chr1	175307329	175308329
Chr1	175342677	175343677
Chr1	175856763	175857763
Chr1	176917848	176918848
Chr1	177748944	177749944
Chr1	177917176	177918176
Chr1	177937896	177938896
Chr1	178006255	178007255
Chr1	178475464	178476464
Chr1	178507489	178508489
Chr1	178507816	178508816
Chr1	178507959	178508959
Chr1	178509487	178510487
Chr1	179056482	179057482
Chr1	179784965	179785965
Chr1	180126017	180127017
Chr1	180127059	180128059
Chr1	180145423	180146423
Chr1	180147672	180148672
Chr1	180156923	180157923
Chr1	180217238	180218238
Chr1	180218111	180219111
Chr1	180221446	180222446
Chr1	180224711	180225711
Chr1	180896069	180897069
Chr1	180903911	180904911
Chr1	181002513	181003513
Chr1	181080394	181081394
Chr1	181098009	181099009
Chr1	181103791	181104791
Chr1	181108354	181109354
Chr1	181121753	181122753
Chr1	181393668	181394668
Chr1	181393924	181394924
Chr1	181473106	181474106
Chr1	182037799	182038799
Chr1	182112081	182113081
Chr1	182271191	182272191
Chr1	183557649	183558649
Chr1	188815460	188816460
Chr1	193854019	193855019
Chr1	197957908	197958908
Chr1	200457268	200458268
Chr1	200457494	200458494
Chr1	200940001	200941001
Chr1	200994444	200995444
Chr1	201011717	201012717
Chr1	201054743	201055743
Chr1	201153698	201154698
Chr1	201183791	201184791
Chr1	201354301	201355301
Chr1	201377270	201378270
Chr1	201436800	201437800
Chr1	201481752	201482752
Chr1	201499548	201500548
Chr1	201528565	201529565
Chr1	201678310	201679310
Chr1	201864529	201865529
Chr1	201968430	201969430
Chr1	201968584	201969584
Chr1	201979855	201980855
Chr1	201991914	201992914
Chr1	202056995	202057995
Chr1	202082739	202083739
Chr1	202104170	202105170
Chr1	202161682	202162682
Chr1	202557783	202558783
Chr1	202558027	202559027
Chr1	202569047	202570047
Chr1	202821090	202822090
Chr1	203008161	203009161
Chr1	203136727	203137727
Chr1	203141004	203142004
Chr1	203303820	203304820
Chr1	203560938	203561938
Chr1	203651559	203652559
Chr1	203651886	203652886
Chr1	204045024	204046024
Chr1	204063104	204064104
Chr1	204065737	204066737
Chr1	204071576	204072576
Chr1	204093450	204094450
Chr1	204131341	204132341
Chr1	204175912	204176912
Chr1	204227219	204228219
Chr1	204414709	204415709
Chr1	204415190	204416190
Chr1	204592829	204593829
Chr1	204760554	204761554
Chr1	204958130	204959130
Chr1	205242426	205243426
Chr1	205255526	205256526
Chr1	205267256	205268256
Chr1	205286116	205287116
Chr1	205294256	205295256
Chr1	205309911	205310911
Chr1	205407492	205408492
Chr1	205410423	205411423
Chr1	205416290	205417290
Chr1	205417771	205418771
Chr1	205423659	205424659
Chr1	205493032	205494032
Chr1	205632149	205633149
Chr1	205645033	205646033
Chr1	206285759	206286759
Chr1	206643556	206644556
Chr1	206644326	206645326
Chr1	206663084	206664084
Chr1	206729218	206730218
Chr1	206908835	206909835
Chr1	206945196	206946196
Chr1	206971136	206972136
Chr1	207106368	207107368
Chr1	207108568	207109568
Chr1	207178027	207179027
Chr1	207326001	207327001
Chr1	207886510	207887510
Chr1	207998763	207999763
Chr1	208058197	208059197
Chr1	208138713	208139713
Chr1	208170820	208171820
Chr1	208380630	208381630
Chr1	208380883	208381883
Chr1	208417913	208418913
Chr1	208418138	208419138
Chr1	209749707	209750707
Chr1	210048558	210049558
Chr1	210580273	210581273
Chr1	211689984	211690984
Chr1	211691628	211692628
Chr1	211715963	211716963
Chr1	211779425	211780425
Chr1	211784322	211785322
Chr1	211803265	211804265
Chr1	211803564	211804564
Chr1	211806179	211807179
Chr1	211806481	211807481
Chr1	211806653	211807653
Chr1	211828214	211829214
Chr1	212207554	212208554
Chr1	212429479	212430479
Chr1	212628896	212629896
Chr1	212635637	212636637
Chr1	212644343	212645343
Chr1	212803076	212804076
Chr1	212838363	212839363
Chr1	213088277	213089277
Chr1	213089811	213090811
Chr1	213090078	213091078
Chr1	213140810	213141810
Chr1	213558899	213559899
Chr1	213647048	213648048
Chr1	213744689	213745689
Chr1	213759700	213760700
Chr1	213935078	213936078
Chr1	214125523	214126523
Chr1	214156807	214157807
Chr1	214222730	214223730
Chr1	214240830	214241830
Chr1	216773965	216774965
Chr1	218694462	218695462
Chr1	220949731	220950731
Chr1	223066343	223067343
Chr1	223189912	223190912
Chr1	223213056	223214056
Chr1	223261720	223262720
Chr1	223306736	223307736
Chr1	223815548	223816548
Chr1	223902640	223903640
Chr1	224368606	224369606
Chr1	224390696	224391696
Chr1	224690801	224691801
Chr1	224701099	224702099
Chr1	225628970	225629970
Chr1	225629596	225630596
Chr1	225630256	225631256
Chr1	225652264	225653264
Chr1	225661579	225662579
Chr1	225888230	225889230
Chr1	225923192	225924192
Chr1	226011306	226012306
Chr1	226033703	226034703
Chr1	226049071	226050071
Chr1	226071292	226072292
Chr1	226075884	226076884
Chr1	226076168	226077168
Chr1	226312492	226313492
Chr1	226384394	226385394
Chr1	226520771	226521771
Chr1	226821528	226822528
Chr1	227100025	227101025
Chr1	227100192	227101192
Chr1	227131340	227132340
Chr1	227131779	227132779
Chr1	227182445	227183445
Chr1	227916795	227917795
Chr1	227917073	227918073
Chr1	227923162	227924162
Chr1	227949859	227950859
Chr1	227982282	227983282
Chr1	228141323	228142323
Chr1	228191626	228192626
Chr1	228288288	228289288
Chr1	228293253	228294253
Chr1	228296974	228297974
Chr1	228328573	228329573
Chr1	228328712	228329712
Chr1	228338362	228339362
Chr1	228347867	228348867
Chr1	228548239	228549239
Chr1	228592666	228593666
Chr1	228666792	228667792
Chr1	228682302	228683302
Chr1	228688615	228689615
Chr1	228688861	228689861
Chr1	228938869	228939869
Chr1	229034887	229035887
Chr1	229114098	229115098
Chr1	229125773	229126773
Chr1	229153306	229154306
Chr1	229163838	229164838
Chr1	229194074	229195074
Chr1	229206947	229207947
Chr1	229264757	229265757
Chr1	229264945	229265945
Chr1	229265654	229266654
Chr1	229266336	229267336
Chr1	229282302	229283302
Chr1	229282635	229283635
Chr1	229304825	229305825
Chr1	229438192	229439192
Chr1	229538852	229539852
Chr1	229544143	229545143
Chr1	229544828	229545828
Chr1	229545091	229546091
Chr1	229644350	229645350
Chr1	229779730	229780730
Chr1	229979237	229980237
Chr1	230204304	230205304
Chr1	230239757	230240757
Chr1	230256340	230257340
Chr1	230295007	230296007
Chr1	230350469	230351469
Chr1	230717058	230718058
Chr1	230838886	230839886
Chr1	230839271	230840271
Chr1	230839618	230840618
Chr1	230842159	230843159
Chr1	230842842	230843842
Chr1	230843130	230844130
Chr1	230843285	230844285
Chr1	230845502	230846502
Chr1	230845826	230846826
Chr1	230846775	230847775
Chr1	230848082	230849082
Chr1	230883577	230884577
Chr1	230904298	230905298
Chr1	230904417	230905417
Chr1	230930848	230931848
Chr1	230933050	230934050
Chr1	230933337	230934337
Chr1	231227362	231228362
Chr1	231351879	231352879
Chr1	231368260	231369260
Chr1	231375921	231376921
Chr1	231474818	231475818
Chr1	232070231	232071231
Chr1	232072892	232073892
Chr1	233135674	233136674
Chr1	233317989	233318989
Chr1	234444995	234445995
Chr1	234445345	234446345
Chr1	234458198	234459198
Chr1	234458391	234459391
Chr1	234673370	234674370
Chr1	234679553	234680553
Chr1	234679947	234680947
Chr1	234680449	234681449
Chr1	234742805	234743805
Chr1	234797550	234798550
Chr1	234844881	234845881
Chr1	234850612	234851612
Chr1	234850928	234851928
Chr1	234851306	234852306
Chr1	234856191	234857191
Chr1	234857837	234858837
Chr1	234861157	234862157
Chr1	234899503	234900503
Chr1	234905339	234906339
Chr1	234915856	234916856
Chr1	234916208	234917208
Chr1	234938397	234939397
Chr1	234951845	234952845
Chr1	234998420	234999420
Chr1	235012296	235013296
Chr1	235094761	235095761
Chr1	235094993	235095993
Chr1	235098038	235099038
Chr1	235109737	235110737
Chr1	235160370	235161370
Chr1	235256338	235257338
Chr1	235256872	235257872
Chr1	235267224	235268224
Chr1	235520512	235521512
Chr1	235805919	235806919
Chr1	235807904	235808904
Chr1	236081012	236082012
Chr1	236165568	236166568
Chr1	236251456	236252456
Chr1	236291611	236292611
Chr1	236331916	236332916
Chr1	236332095	236333095
Chr1	236588322	236589322
Chr1	236654674	236655674
Chr1	236658266	236659266
Chr1	237766089	237767089
Chr1	238113636	238114636
Chr1	240115865	240116865
Chr1	240774889	240775889
Chr1	240855053	240856053
Chr1	242135681	242136681
Chr1	243636750	243637750
Chr1	244394858	244395858
Chr1	244516710	244517710
Chr1	245270742	245271742
Chr1	245271006	245272006
Chr1	245679140	245680140
Chr1	245973365	245974365
Chr1	246676474	246677474
Chr1	246852602	246853602
Chr1	246948717	246949717
Chr1	246952734	246953734
Chr1	246961981	246962981
Chr1	246972474	246973474
Chr1	247251185	247252185
Chr1	247253470	247254470
Chr1	247277539	247278539
Chr1	247634338	247635338
Chr1	249151158	249152158
Chr10	126404	127404
Chr10	130253	131253
Chr10	131669	132669
Chr10	323609	324609
Chr10	325064	326064
Chr10	334258	335258
Chr10	362105	363105
Chr10	370928	371928
Chr10	404836	405836
Chr10	424617	425617
Chr10	454740	455740
Chr10	463106	464106
Chr10	555254	556254
Chr10	555405	556405
Chr10	563737	564737
Chr10	573574	574574
Chr10	574280	575280
Chr10	582535	583535
Chr10	586862	587862
Chr10	587424	588424
Chr10	587604	588604
Chr10	596729	597729
Chr10	643640	644640
Chr10	652516	653516
Chr10	665270	666270
Chr10	665376	666376
Chr10	668698	669698
Chr10	684489	685489
Chr10	696339	697339
Chr10	696732	697732
Chr10	697755	698755
Chr10	697959	698959
Chr10	707230	708230
Chr10	707430	708430
Chr10	712826	713826
Chr10	733330	734330
Chr10	742885	743885
Chr10	771202	772202
Chr10	771302	772302
Chr10	819932	820932
Chr10	829196	830196
Chr10	836878	837878
Chr10	848105	849105
Chr10	848246	849246
Chr10	848592	849592
Chr10	851547	852547
Chr10	852849	853849
Chr10	893402	894402
Chr10	923561	924561
Chr10	1000086	1001086
Chr10	1014226	1015226
Chr10	1015478	1016478
Chr10	1020710	1021710
Chr10	1041168	1042168
Chr10	1056353	1057353
Chr10	1082076	1083076
Chr10	1147597	1148597
Chr10	1149165	1150165
Chr10	1165828	1166828
Chr10	1202649	1203649
Chr10	1224029	1225029
Chr10	1229304	1230304
Chr10	1231509	1232509
Chr10	1236767	1237767
Chr10	1254337	1255337
Chr10	1282215	1283215
Chr10	1289680	1290680
Chr10	1331245	1332245
Chr10	1356190	1357190
Chr10	1401982	1402982
Chr10	1408609	1409609
Chr10	1421418	1422418
Chr10	1441160	1442160
Chr10	1441945	1442945
Chr10	1476900	1477900
Chr10	1504738	1505738
Chr10	1516612	1517612
Chr10	1528792	1529792
Chr10	1534571	1535571
Chr10	1598956	1599956
Chr10	1603557	1604557
Chr10	1615357	1616357
Chr10	1633430	1634430
Chr10	1695781	1696781
Chr10	1976553	1977553
Chr10	2005208	2006208
Chr10	2005383	2006383
Chr10	2566945	2567945
Chr10	2774748	2775748
Chr10	3062790	3063790
Chr10	3132854	3133854
Chr10	3141330	3142330
Chr10	3147084	3148084
Chr10	3149604	3150604
Chr10	3150914	3151914
Chr10	3156425	3157425
Chr10	3159478	3160478
Chr10	3174381	3175381
Chr10	3178104	3179104
Chr10	3179996	3180996
Chr10	3187288	3188288
Chr10	3189024	3190024
Chr10	3229357	3230357
Chr10	3279404	3280404
Chr10	3281500	3282500
Chr10	3330311	3331311
Chr10	3393856	3394856
Chr10	3524139	3525139
Chr10	3528245	3529245
Chr10	3557864	3558864
Chr10	3558093	3559093
Chr10	3579829	3580829
Chr10	3581542	3582542
Chr10	3585926	3586926
Chr10	3743924	3744924
Chr10	3772086	3773086
Chr10	3777156	3778156
Chr10	3789015	3790015
Chr10	3799712	3800712
Chr10	3799872	3800872
Chr10	3801917	3802917
Chr10	3807143	3808143
Chr10	3821394	3822394
Chr10	3822099	3823099
Chr10	3823820	3824820
Chr10	3823975	3824975
Chr10	3824312	3825312
Chr10	3867189	3868189
Chr10	3868024	3869024
Chr10	3923006	3924006
Chr10	3927425	3928425
Chr10	3940703	3941703
Chr10	3951222	3952222
Chr10	3974112	3975112
Chr10	3991623	3992623
Chr10	3992424	3993424
Chr10	4033904	4034904
Chr10	4306300	4307300
Chr10	4649509	4650509
Chr10	4670020	4671020
Chr10	4703379	4704379
Chr10	4775408	4776408
Chr10	4839060	4840060
Chr10	4884204	4885204
Chr10	5014224	5015224
Chr10	5015171	5016171
Chr10	5025654	5026654
Chr10	5403938	5404938
Chr10	5404990	5405990
Chr10	5406592	5407592
Chr10	5422704	5423704
Chr10	5502677	5503677
Chr10	5510613	5511613
Chr10	5519620	5520620
Chr10	5527547	5528547
Chr10	5533002	5534002
Chr10	5534799	5535799
Chr10	5538050	5539050
Chr10	5540261	5541261
Chr10	5542613	5543613
Chr10	5546313	5547313
Chr10	5556104	5557104
Chr10	5557069	5558069
Chr10	5566410	5567410
Chr10	5567390	5568390
Chr10	5570538	5571538
Chr10	5573172	5574172
Chr10	5573849	5574849
Chr10	5574587	5575587
Chr10	5574871	5575871
Chr10	5575576	5576576
Chr10	5595531	5596531
Chr10	5598115	5599115
Chr10	5599340	5600340
Chr10	5602433	5603433
Chr10	5602792	5603792
Chr10	5603048	5604048
Chr10	5603507	5604507
Chr10	5607928	5608928
Chr10	5611616	5612616
Chr10	5611796	5612796
Chr10	5611938	5612938
Chr10	5614006	5615006
Chr10	5615609	5616609
Chr10	5618442	5619442
Chr10	5618761	5619761
Chr10	5623810	5624810
Chr10	5632600	5633600
Chr10	5633147	5634147
Chr10	5636254	5637254
Chr10	5638556	5639556
Chr10	5641793	5642793
Chr10	5651541	5652541
Chr10	5657373	5658373
Chr10	5658786	5659786
Chr10	5660579	5661579
Chr10	5661031	5662031
Chr10	5664748	5665748
Chr10	5666342	5667342
Chr10	5673588	5674588
Chr10	5705627	5706627
Chr10	5916564	5917564
Chr10	5958768	5959768
Chr10	5979347	5980347
Chr10	5991004	5992004
Chr10	5994756	5995756
Chr10	6004743	6005743
Chr10	6092225	6093225
Chr10	6095776	6096776
Chr10	6169847	6170847
Chr10	6183040	6184040
Chr10	6188637	6189637
Chr10	6219305	6220305
Chr10	6246152	6247152
Chr10	6246318	6247318
Chr10	6264309	6265309
Chr10	6267040	6268040
Chr10	6270924	6271924
Chr10	6272787	6273787
Chr10	6427226	6428226
Chr10	6689332	6690332
Chr10	6689575	6690575
Chr10	6736401	6737401
Chr10	6743069	6744069
Chr10	6788763	6789763
Chr10	6860648	6861648
Chr10	6959989	6960989
Chr10	6961671	6962671
Chr10	7084314	7085314
Chr10	7212324	7213324
Chr10	7298766	7299766
Chr10	7420159	7421159
Chr10	7517203	7518203
Chr10	7567073	7568073
Chr10	7567739	7568739
Chr10	7569553	7570553
Chr10	7589698	7590698
Chr10	7593508	7594508
Chr10	7595105	7596105
Chr10	7618099	7619099
Chr10	7621312	7622312
Chr10	7643125	7644125
Chr10	7664777	7665777
Chr10	7667968	7668968
Chr10	7707187	7708187
Chr10	7737781	7738781
Chr10	7747768	7748768
Chr10	7760482	7761482
Chr10	7762170	7763170
Chr10	7764463	7765463
Chr10	7764750	7765750
Chr10	7766948	7767948
Chr10	7798017	7799017
Chr10	7896886	7897886
Chr10	8063757	8064757
Chr10	8088497	8089497
Chr10	8089046	8090046
Chr10	8089806	8090806
Chr10	8144663	8145663
Chr10	8373863	8374863
Chr10	9250830	9251830
Chr10	11322831	11323831
Chr10	11325677	11326677
Chr10	11343380	11344380
Chr10	11380992	11381992
Chr10	11393402	11394402
Chr10	11422539	11423539
Chr10	11479161	11480161
Chr10	11482714	11483714
Chr10	11492867	11493867
Chr10	11493405	11494405
Chr10	11667710	11668710
Chr10	11683787	11684787
Chr10	11704133	11705133
Chr10	11723452	11724452
Chr10	11724743	11725743
Chr10	11767009	11768009
Chr10	11786442	11787442
Chr10	11802189	11803189
Chr10	11803840	11804840
Chr10	11804105	11805105
Chr10	11804955	11805955
Chr10	11837103	11838103
Chr10	11866573	11867573
Chr10	11901563	11902563
Chr10	11914988	11915988
Chr10	11917925	11918925
Chr10	11920515	11921515
Chr10	11923330	11924330
Chr10	11935532	11936532
Chr10	11940073	11941073
Chr10	11950256	11951256
Chr10	12123226	12124226
Chr10	12171991	12172991
Chr10	12392090	12393090
Chr10	12544763	12545763
Chr10	12628209	12629209
Chr10	12861318	12862318
Chr10	12951253	12952253
Chr10	13038726	13039726
Chr10	13139662	13140662
Chr10	13272967	13273967
Chr10	13280169	13281169
Chr10	13282301	13283301
Chr10	13289083	13290083
Chr10	13332122	13333122
Chr10	13394194	13395194
Chr10	13451610	13452610
Chr10	13472626	13473626
Chr10	13544341	13545341
Chr10	13695859	13696859
Chr10	13701842	13702842
Chr10	13743247	13744247
Chr10	13749171	13750171
Chr10	13830162	13831162
Chr10	13868857	13869857
Chr10	13970262	13971262
Chr10	14238601	14239601
Chr10	14413964	14414964
Chr10	14573764	14574764
Chr10	14578588	14579588
Chr10	14589565	14590565
Chr10	14595744	14596744
Chr10	14601979	14602979
Chr10	14637583	14638583
Chr10	14640424	14641424
Chr10	14843467	14844467
Chr10	14885063	14886063
Chr10	15188095	15189095
Chr10	15214984	15215984
Chr10	15251499	15252499
Chr10	15307524	15308524
Chr10	15383524	15384524
Chr10	15408986	15409986
Chr10	15409176	15410176
Chr10	15411076	15412076
Chr10	15411461	15412461
Chr10	15767158	15768158
Chr10	16564745	16565745
Chr10	17007748	17008748
Chr10	17031322	17032322
Chr10	17067402	17068402
Chr10	18332847	18333847
Chr10	18334122	18335122
Chr10	20106765	20107765
Chr10	21554966	21555966
Chr10	21604683	21605683
Chr10	21694521	21695521
Chr10	21715324	21716324
Chr10	21715472	21716472
Chr10	21791214	21792214
Chr10	21809626	21810626
Chr10	22020773	22021773
Chr10	22027485	22028485
Chr10	22035943	22036943
Chr10	22041582	22042582
Chr10	22046175	22047175
Chr10	22341586	22342586
Chr10	22857651	22858651
Chr10	22958052	22959052
Chr10	23138029	23139029
Chr10	23140475	23141475
Chr10	23216389	23217389
Chr10	23297782	23298782
Chr10	23352597	23353597
Chr10	23356640	23357640
Chr10	23356780	23357780
Chr10	23370545	23371545
Chr10	23436891	23437891
Chr10	23444467	23445467
Chr10	23459759	23460759
Chr10	23459937	23460937
Chr10	23471796	23472796
Chr10	23484653	23485653
Chr10	23580076	23581076
Chr10	23626833	23627833
Chr10	23987432	23988432
Chr10	23991562	23992562
Chr10	24485142	24486142
Chr10	24498754	24499754
Chr10	24503418	24504418
Chr10	24608082	24609082
Chr10	24649097	24650097
Chr10	24758835	24759835
Chr10	24842619	24843619
Chr10	24859032	24860032
Chr10	25010213	25011213
Chr10	25072600	25073600
Chr10	25194935	25195935
Chr10	25349603	25350603
Chr10	25350221	25351221
Chr10	25927003	25928003
Chr10	26623775	26624775
Chr10	27389664	27390664
Chr10	27531571	27532571
Chr10	27531953	27532953
Chr10	28623529	28624529
Chr10	28757398	28758398
Chr10	28757589	28758589
Chr10	28967204	28968204
Chr10	28970669	28971669
Chr10	28999503	29000503
Chr10	29164178	29165178
Chr10	29164310	29165310
Chr10	29186261	29187261
Chr10	29198510	29199510
[truncated: 87,218 more rows]

## Sheet: enhancers in HepG2
Chromosome	Chromosome	start	end
	Chr1	19651	20651
	Chr1	662105	663105
	Chr1	895446	896446
	Chr1	895782	896782
	Chr1	902163	903163
	Chr1	930519	931519
	Chr1	930856	931856
	Chr1	935252	936252
	Chr1	939307	940307
	Chr1	940338	941338
	Chr1	941533	942533
	Chr1	951134	952134
	Chr1	952464	953464
	Chr1	954578	955578
	Chr1	955232	956232
	Chr1	955532	956532
	Chr1	959762	960762
	Chr1	972939	973939
	Chr1	993272	994272
	Chr1	994375	995375
	Chr1	999029	1000029
	Chr1	1014861	1015861
	Chr1	1051094	1052094
	Chr1	1059916	1060916
	Chr1	1063130	1064130
	Chr1	1063740	1064740
	Chr1	1065278	1066278
	Chr1	1068274	1069274
	Chr1	1068417	1069417
	Chr1	1079582	1080582
	Chr1	1093242	1094242
	Chr1	1100361	1101361
	Chr1	1103309	1104309
	Chr1	1165794	1166794
	Chr1	1166147	1167147
	Chr1	1167067	1168067
	Chr1	1167930	1168930
	Chr1	1171485	1172485
	Chr1	1173196	1174196
	Chr1	1174536	1175536
	Chr1	1174890	1175890
	Chr1	1208402	1209402
	Chr1	1217244	1218244
	Chr1	1240235	1241235
	Chr1	1241148	1242148
	Chr1	1241817	1242817
	Chr1	1242983	1243983
	Chr1	1244751	1245751
	Chr1	1259739	1260739
	Chr1	1260854	1261854
	Chr1	1261177	1262177
	Chr1	1265656	1266656
	Chr1	1279865	1280865
	Chr1	1282825	1283825
	Chr1	1283958	1284958
	Chr1	1284500	1285500
	Chr1	1294475	1295475
	Chr1	1307069	1308069
	Chr1	1311140	1312140
	Chr1	1311416	1312416
	Chr1	1332895	1333895
	Chr1	1333290	1334290
	Chr1	1335892	1336892
	Chr1	1342276	1343276
	Chr1	1356178	1357178
	Chr1	1360927	1361927
	Chr1	1361600	1362600
	Chr1	1362867	1363867
	Chr1	1364750	1365750
	Chr1	1365019	1366019
	Chr1	1365739	1366739
	Chr1	1369853	1370853
	Chr1	1370472	1371472
	Chr1	1371272	1372272
	Chr1	1373039	1374039
	Chr1	1397455	1398455
	Chr1	1407093	1408093
	Chr1	1407761	1408761
	Chr1	1439749	1440749
	Chr1	1439986	1440986
	Chr1	1440134	1441134
	Chr1	1447482	1448482
	Chr1	1478442	1479442
	Chr1	1490206	1491206
	Chr1	1508860	1509860
	Chr1	1509623	1510623
	Chr1	1549234	1550234
	Chr1	1549509	1550509
	Chr1	1550558	1551558
	Chr1	1609964	1610964
	Chr1	1611477	1612477
	Chr1	1611993	1612993
	Chr1	1613627	1614627
	Chr1	1617346	1618346
	Chr1	1623821	1624821
	Chr1	1624085	1625085
	Chr1	1677390	1678390
	Chr1	1680172	1681172
	Chr1	1680340	1681340
	Chr1	1689902	1690902
	Chr1	1698253	1699253
	Chr1	1700030	1701030
	Chr1	1700195	1701195
	Chr1	1708215	1709215
	Chr1	1709598	1710598
	Chr1	1710434	1711434
	Chr1	1710824	1711824
	Chr1	1711380	1712380
	Chr1	1713342	1714342
	Chr1	1713942	1714942
	Chr1	1714494	1715494
	Chr1	1764015	1765015
	Chr1	1765101	1766101
	Chr1	1790402	1791402
	Chr1	1793844	1794844
	Chr1	1814645	1815645
	Chr1	1819410	1820410
	Chr1	1820511	1821511
	Chr1	1821164	1822164
	Chr1	1822297	1823297
	Chr1	1825407	1826407
	Chr1	1838337	1839337
	Chr1	1839455	1840455
	Chr1	1839982	1840982
	Chr1	1850335	1851335
	Chr1	1851240	1852240
	Chr1	1851698	1852698
	Chr1	1852138	1853138
	Chr1	1854653	1855653
	Chr1	1872248	1873248
	Chr1	1872509	1873509
	Chr1	1874168	1875168
	Chr1	1886617	1887617
	Chr1	1886798	1887798
	Chr1	1890971	1891971
	Chr1	1977604	1978604
	Chr1	1978421	1979421
	Chr1	1979056	1980056
	Chr1	1981672	1982672
	Chr1	2003371	2004371
	Chr1	2028985	2029985
	Chr1	2029334	2030334
	Chr1	2034404	2035404
	Chr1	2034614	2035614
	Chr1	2034827	2035827
	Chr1	2035860	2036860
	Chr1	2064253	2065253
	Chr1	2064889	2065889
	Chr1	2065122	2066122
	Chr1	2066033	2067033
	Chr1	2068336	2069336
	Chr1	2068688	2069688
	Chr1	2069041	2070041
	Chr1	2069385	2070385
	Chr1	2120864	2121864
	Chr1	2123185	2124185
	Chr1	2124504	2125504
	Chr1	2125987	2126987
	Chr1	2126697	2127697
	Chr1	2127161	2128161
	Chr1	2135178	2136178
	Chr1	2135896	2136896
	Chr1	2138833	2139833
	Chr1	2143803	2144803
	Chr1	2151060	2152060
	Chr1	2151478	2152478
	Chr1	2158564	2159564
	Chr1	2159225	2160225
	Chr1	2161150	2162150
	Chr1	2162099	2163099
	Chr1	2164387	2165387
	Chr1	2164602	2165602
	Chr1	2164848	2165848
	Chr1	2165473	2166473
	Chr1	2171400	2172400
	Chr1	2171674	2172674
	Chr1	2177606	2178606
	Chr1	2178754	2179754
	Chr1	2179107	2180107
	Chr1	2179553	2180553
	Chr1	2180173	2181173
	Chr1	2181241	2182241
	Chr1	2181905	2182905
	Chr1	2188400	2189400
	Chr1	2200657	2201657
	Chr1	2201429	2202429
	Chr1	2202009	2203009
	Chr1	2202484	2203484
	Chr1	2202651	2203651
	Chr1	2210218	2211218
	Chr1	2241482	2242482
	Chr1	2242577	2243577
	Chr1	2243443	2244443
	Chr1	2245087	2246087
	Chr1	2245479	2246479
	Chr1	2246051	2247051
	Chr1	2247649	2248649
	Chr1	2248347	2249347
	Chr1	2248637	2249637
	Chr1	2322624	2323624
	Chr1	2324662	2325662
	Chr1	2342899	2343899
	Chr1	2344356	2345356
	Chr1	2457408	2458408
	Chr1	2477556	2478556
	Chr1	2478529	2479529
	Chr1	2486840	2487840
	Chr1	2487499	2488499
	Chr1	2488134	2489134
	Chr1	2507205	2508205
	Chr1	2509416	2510416
	Chr1	2509804	2510804
	Chr1	2514408	2515408
	Chr1	2516692	2517692
	Chr1	2517791	2518791
	Chr1	2564113	2565113
	Chr1	2572524	2573524
	Chr1	2727387	2728387
	Chr1	2985904	2986904
	Chr1	2986206	2987206
	Chr1	2986951	2987951
	Chr1	2987909	2988909
	Chr1	3029431	3030431
	Chr1	3031486	3032486
	Chr1	3042260	3043260
	Chr1	3049991	3050991
	Chr1	3050221	3051221
	Chr1	3050588	3051588
	Chr1	3051965	3052965
	Chr1	3055821	3056821
	Chr1	3056033	3057033
	Chr1	3087204	3088204
	Chr1	3088016	3089016
	Chr1	3109063	3110063
	Chr1	3135603	3136603
	Chr1	3135974	3136974
	Chr1	3138291	3139291
	Chr1	3145573	3146573
	Chr1	3152288	3153288
	Chr1	3153777	3154777
	Chr1	3154509	3155509
	Chr1	3166336	3167336
	Chr1	3166889	3167889
	Chr1	3167349	3168349
	Chr1	3208437	3209437
	Chr1	3208809	3209809
	Chr1	3209541	3210541
	Chr1	3229347	3230347
	Chr1	3229568	3230568
	Chr1	3236598	3237598
	Chr1	3239334	3240334
	Chr1	3243544	3244544
	Chr1	3244535	3245535
	Chr1	3247032	3248032
	Chr1	3251393	3252393
	Chr1	3256984	3257984
	Chr1	3264596	3265596
	Chr1	3264872	3265872
	Chr1	3265082	3266082
	Chr1	3265924	3266924
	Chr1	3266667	3267667
	Chr1	3266839	3267839
	Chr1	3266976	3267976
	Chr1	3272117	3273117
	Chr1	3272409	3273409
	Chr1	3273057	3274057
	Chr1	3339231	3340231
	Chr1	3339677	3340677
	Chr1	3340534	3341534
	Chr1	3340737	3341737
	Chr1	3340940	3341940
	Chr1	3356518	3357518
	Chr1	3357724	3358724
	Chr1	3369820	3370820
	Chr1	3370039	3371039
	Chr1	3373148	3374148
	Chr1	3375649	3376649
	Chr1	3375882	3376882
	Chr1	3376353	3377353
	Chr1	3376902	3377902
	Chr1	3396793	3397793
	Chr1	3541263	3542263
	Chr1	3569346	3570346
	Chr1	3582496	3583496
	Chr1	3582730	3583730
	Chr1	3649467	3650467
	Chr1	3650192	3651192
	Chr1	3688642	3689642
	Chr1	3690033	3691033
	Chr1	3690347	3691347
	Chr1	3691827	3692827
	Chr1	3692648	3693648
	Chr1	3693438	3694438
	Chr1	3701418	3702418
	Chr1	3816585	3817585
	Chr1	3819307	3820307
	Chr1	3819543	3820543
	Chr1	4002548	4003548
	Chr1	4327233	4328233
	Chr1	4333503	4334503
	Chr1	5993196	5994196
	Chr1	5993523	5994523
	Chr1	5993796	5994796
	Chr1	6009110	6010110
	Chr1	6015158	6016158
	Chr1	6034917	6035917
	Chr1	6105272	6106272
	Chr1	6264810	6265810
	Chr1	6294977	6295977
	Chr1	6295552	6296552
	Chr1	6299866	6300866
	Chr1	6300305	6301305
	Chr1	6340486	6341486
	Chr1	6341317	6342317
	Chr1	6341590	6342590
	Chr1	6403247	6404247
	Chr1	6403781	6404781
	Chr1	6411591	6412591
	Chr1	6411981	6412981
	Chr1	6413603	6414603
	Chr1	6413849	6414849
	Chr1	6414100	6415100
	Chr1	6414478	6415478
	Chr1	6418560	6419560
	Chr1	6418849	6419849
	Chr1	6419251	6420251
	Chr1	6420301	6421301
	Chr1	6453211	6454211
	Chr1	6505671	6506671
	Chr1	6509375	6510375
	Chr1	6509650	6510650
	Chr1	6509875	6510875
	Chr1	6510805	6511805
	Chr1	6550293	6551293
	Chr1	6570793	6571793
	Chr1	6571869	6572869
	Chr1	6572858	6573858
	Chr1	6614053	6615053
	Chr1	6614997	6615997
	Chr1	6637893	6638893
	Chr1	6640457	6641457
	Chr1	6641602	6642602
	Chr1	6642055	6643055
	Chr1	6642369	6643369
	Chr1	6647535	6648535
	Chr1	6647826	6648826
	Chr1	6648182	6649182
	Chr1	6659338	6660338
	Chr1	6662284	6663284
	Chr1	6664210	6665210
	Chr1	6664775	6665775
	Chr1	6665116	6666116
	Chr1	6673359	6674359
	Chr1	6675481	6676481
	Chr1	6684838	6685838
	Chr1	6685502	6686502
	Chr1	6783796	6784796
	Chr1	6784278	6785278
	Chr1	6844836	6845836
	Chr1	6867437	6868437
	Chr1	6882168	6883168
	Chr1	6882309	6883309
	Chr1	6969640	6970640
	Chr1	7738482	7739482
	Chr1	7740090	7741090
	Chr1	7740694	7741694
	Chr1	7748379	7749379
	Chr1	7763897	7764897
	Chr1	7764294	7765294
	Chr1	7764852	7765852
	Chr1	7812174	7813174
	Chr1	7814042	7815042
	Chr1	7830954	7831954
	Chr1	7843543	7844543
	Chr1	8064466	8065466
	Chr1	8064799	8065799
	Chr1	8064988	8065988
	Chr1	8066117	8067117
	Chr1	8066369	8067369
	Chr1	8069450	8070450
	Chr1	8069796	8070796
	Chr1	8071704	8072704
	Chr1	8073137	8074137
	Chr1	8074555	8075555
	Chr1	8074773	8075773
	Chr1	8077444	8078444
	Chr1	8077669	8078669
	Chr1	8077964	8078964
	Chr1	8100330	8101330
	Chr1	8120976	8121976
	Chr1	8130023	8131023
	Chr1	8136964	8137964
	Chr1	8143889	8144889
	Chr1	8153274	8154274
	Chr1	8154372	8155372
	Chr1	8155460	8156460
	Chr1	8156397	8157397
	Chr1	8157663	8158663
	Chr1	8175501	8176501
	Chr1	8176679	8177679
	Chr1	8177109	8178109
	Chr1	8181909	8182909
	Chr1	8193679	8194679
	Chr1	8206008	8207008
	Chr1	8211175	8212175
	Chr1	8213761	8214761
	Chr1	8213973	8214973
	Chr1	8214500	8215500
	Chr1	8215255	8216255
	Chr1	8229673	8230673
	Chr1	8243753	8244753
	Chr1	8249700	8250700
	Chr1	8257580	8258580
	Chr1	8260084	8261084
	Chr1	8260457	8261457
	Chr1	8261065	8262065
	Chr1	8268739	8269739
	Chr1	8271645	8272645
	Chr1	8271985	8272985
	Chr1	8289873	8290873
	Chr1	8299231	8300231
	Chr1	8301096	8302096
	Chr1	8301596	8302596
	Chr1	8318335	8319335
	Chr1	8318995	8319995
	Chr1	8322937	8323937
	Chr1	8341628	8342628
	Chr1	8375396	8376396
	Chr1	8375564	8376564
	Chr1	8427217	8428217
	Chr1	8427616	8428616
	Chr1	8456550	8457550
	Chr1	8480004	8481004
	Chr1	8482556	8483556
	Chr1	8483466	8484466
	Chr1	8484122	8485122
	Chr1	8484305	8485305
	Chr1	8580512	8581512
	Chr1	8585757	8586757
	Chr1	8611115	8612115
	Chr1	8611333	8612333
	Chr1	8611512	8612512
	Chr1	8611863	8612863
	Chr1	8623654	8624654
	Chr1	8623972	8624972
	Chr1	8631471	8632471
	Chr1	8631906	8632906
	Chr1	8703634	8704634
	Chr1	8722879	8723879
	Chr1	8723591	8724591
	Chr1	8723825	8724825
	Chr1	8729948	8730948
	Chr1	8730211	8731211
	Chr1	8740619	8741619
	Chr1	8741030	8742030
	Chr1	8757990	8758990
	Chr1	8761189	8762189
	Chr1	8761921	8762921
	Chr1	8772104	8773104
	Chr1	8776926	8777926
	Chr1	8780155	8781155
	Chr1	8796734	8797734
	Chr1	8799839	8800839
	Chr1	8805670	8806670
	Chr1	8813442	8814442
	Chr1	8842000	8843000
	Chr1	8878207	8879207
	Chr1	8884119	8885119
	Chr1	8888956	8889956
	Chr1	8889151	8890151
	Chr1	8907778	8908778
	Chr1	8914497	8915497
	Chr1	8916435	8917435
	Chr1	8916861	8917861
	Chr1	8917929	8918929
	Chr1	8918967	8919967
	Chr1	8919168	8920168
	Chr1	8920846	8921846
	Chr1	8922375	8923375
	Chr1	8929490	8930490
	Chr1	8930260	8931260
	Chr1	8931271	8932271
	Chr1	8933339	8934339
	Chr1	8938276	8939276
	Chr1	8939658	8940658
	Chr1	8939988	8940988
	Chr1	8949696	8950696
	Chr1	8959904	8960904
	Chr1	8973222	8974222
	Chr1	9054070	9055070
	Chr1	9061279	9062279
	Chr1	9061496	9062496
	Chr1	9160227	9161227
	Chr1	9160578	9161578
	Chr1	9161302	9162302
	Chr1	9170456	9171456
	Chr1	9171541	9172541
	Chr1	9172805	9173805
	Chr1	9174162	9175162
	Chr1	9187702	9188702
	Chr1	9187863	9188863
	Chr1	9188708	9189708
	Chr1	9209535	9210535
	Chr1	9213504	9214504
	Chr1	9218270	9219270
	Chr1	9222582	9223582
	Chr1	9222879	9223879
	Chr1	9223292	9224292
	Chr1	9223768	9224768
	Chr1	9239980	9240980
	Chr1	9240250	9241250
	Chr1	9253783	9254783
	Chr1	9253950	9254950
	Chr1	9292996	9293996
	Chr1	9294311	9295311
	Chr1	9298275	9299275
	Chr1	9299358	9300358
	Chr1	9302248	9303248
	Chr1	9309716	9310716
	Chr1	9326796	9327796
	Chr1	9335295	9336295
	Chr1	9338975	9339975
	Chr1	9339242	9340242
	Chr1	9340247	9341247
	Chr1	9349686	9350686
	Chr1	9351616	9352616
	Chr1	9352313	9353313
	Chr1	9354512	9355512
	Chr1	9354768	9355768
	Chr1	9359970	9360970
	Chr1	9459542	9460542
	Chr1	9460520	9461520
	Chr1	9461564	9462564
	Chr1	9461821	9462821
	Chr1	9462475	9463475
	Chr1	9493975	9494975
	Chr1	9495045	9496045
	Chr1	9496057	9497057
	Chr1	9497727	9498727
	Chr1	9498352	9499352
	Chr1	9555401	9556401
	Chr1	9563086	9564086
	Chr1	9592548	9593548
	Chr1	9598452	9599452
	Chr1	9598927	9599927
	Chr1	9599622	9600622
	Chr1	9609889	9610889
	Chr1	9613130	9614130
	Chr1	9613550	9614550
	Chr1	9617386	9618386
	Chr1	9621143	9622143
	Chr1	9621267	9622267
	Chr1	9624723	9625723
	Chr1	9625135	9626135
	Chr1	9625481	9626481
	Chr1	9648453	9649453
	Chr1	9653170	9654170
	Chr1	9731370	9732370
	Chr1	9731567	9732567
	Chr1	9749711	9750711
	Chr1	9776485	9777485
	Chr1	9777115	9778115
	Chr1	9778864	9779864
	Chr1	9781166	9782166
	Chr1	9781463	9782463
	Chr1	9819230	9820230
	Chr1	9864967	9865967
	Chr1	9874952	9875952
	Chr1	9930432	9931432
	Chr1	9934790	9935790
	Chr1	9960196	9961196
	Chr1	9961389	9962389
	Chr1	9968972	9969972
	Chr1	9970088	9971088
	Chr1	9972379	9973379
	Chr1	9973349	9974349
	Chr1	9973984	9974984
	Chr1	9989680	9990680
	Chr1	9993864	9994864
	Chr1	9995022	9996022
	Chr1	10002254	10003254
	Chr1	10004140	10005140
	Chr1	10092407	10093407
	Chr1	10116314	10117314
	Chr1	10125114	10126114
	Chr1	10144995	10145995
	Chr1	10212527	10213527
	Chr1	10229127	10230127
	Chr1	10230898	10231898
	Chr1	10232054	10233054
	Chr1	10270378	10271378
	Chr1	10288262	10289262
	Chr1	10317608	10318608
	Chr1	10324639	10325639
	Chr1	10447993	10448993
	Chr1	10448185	10449185
	Chr1	10485915	10486915
	Chr1	10487758	10488758
	Chr1	10490144	10491144
	Chr1	10498407	10499407
	Chr1	10564071	10565071
	Chr1	10575932	10576932
	Chr1	10615511	10616511
	Chr1	10615803	10616803
	Chr1	10657785	10658785
	Chr1	10658950	10659950
	Chr1	10659325	10660325
	Chr1	10737305	10738305
	Chr1	10739363	10740363
	Chr1	10740173	10741173
	Chr1	10741003	10742003
	Chr1	10741317	10742317
	Chr1	10741480	10742480
	Chr1	10745910	10746910
	Chr1	10997104	10998104
	Chr1	10999732	11000732
	Chr1	11039287	11040287
	Chr1	11039835	11040835
	Chr1	11106042	11107042
	Chr1	11106645	11107645
	Chr1	11118291	11119291
	Chr1	11121570	11122570
	Chr1	11271671	11272671
	Chr1	11275810	11276810
	Chr1	11322790	11323790
	Chr1	11324745	11325745
	Chr1	11327145	11328145
	Chr1	11328255	11329255
	Chr1	11329468	11330468
	Chr1	11705401	11706401
	Chr1	11707825	11708825
	Chr1	11709655	11710655
	Chr1	11723762	11724762
	Chr1	11724374	11725374
	Chr1	11731376	11732376
	Chr1	11796751	11797751
	Chr1	11862452	11863452
	Chr1	11862811	11863811
	Chr1	11864466	11865466
	Chr1	11899513	11900513
	Chr1	11902410	11903410
	Chr1	11969245	11970245
	Chr1	11969502	11970502
	Chr1	11974955	11975955
	Chr1	11985216	11986216
	Chr1	11985360	11986360
	Chr1	11985580	11986580
	Chr1	11986133	11987133
	Chr1	11989684	11990684
	Chr1	11990028	11991028
	Chr1	11999038	12000038
	Chr1	12000262	12001262
	Chr1	12004000	12005000
	Chr1	12008849	12009849
	Chr1	12020115	12021115
	Chr1	12020983	12021983
	Chr1	12026919	12027919
	Chr1	12039038	12040038
	Chr1	12039678	12040678
	Chr1	12040430	12041430
	Chr1	12044267	12045267
	Chr1	12050475	12051475
	Chr1	12079220	12080220
	Chr1	12094129	12095129
	Chr1	12406487	12407487
	Chr1	12415751	12416751
	Chr1	12416012	12417012
	Chr1	12429004	12430004
	Chr1	12436203	12437203
	Chr1	12440972	12441972
	Chr1	12460582	12461582
	Chr1	12466385	12467385
	Chr1	12466791	12467791
	Chr1	12467124	12468124
	Chr1	12493235	12494235
	Chr1	12493567	12494567
	Chr1	12496658	12497658
	Chr1	12513245	12514245
	Chr1	12535663	12536663
	Chr1	12537857	12538857
	Chr1	12585269	12586269
	Chr1	12587596	12588596
	Chr1	12589049	12590049
	Chr1	12599871	12600871
	Chr1	12608814	12609814
	Chr1	12609346	12610346
	Chr1	12626691	12627691
	Chr1	12645221	12646221
	Chr1	12647905	12648905
	Chr1	12663099	12664099
	Chr1	12664030	12665030
	Chr1	12667938	12668938
	Chr1	12668477	12669477
	Chr1	12674465	12675465
	Chr1	12674924	12675924
	Chr1	12675856	12676856
	Chr1	12677244	12678244
	Chr1	12679183	12680183
	Chr1	12679464	12680464
	Chr1	14455196	14456196
	Chr1	15239734	15240734
	Chr1	15250131	15251131
	Chr1	15250674	15251674
	Chr1	15265874	15266874
	Chr1	15266747	15267747
	Chr1	15268528	15269528
	Chr1	15276067	15277067
	Chr1	15279017	15280017
	Chr1	15282837	15283837
	Chr1	15296329	15297329
	Chr1	15298427	15299427
	Chr1	15319617	15320617
	Chr1	15322263	15323263
	Chr1	15322860	15323860
	Chr1	15325524	15326524
	Chr1	15347630	15348630
	Chr1	15349450	15350450
	Chr1	15353726	15354726
	Chr1	15466059	15467059
	Chr1	15477619	15478619
	Chr1	15479834	15480834
	Chr1	15484922	15485922
	Chr1	15497954	15498954
	Chr1	15500004	15501004
	Chr1	15506421	15507421
	Chr1	15507206	15508206
	Chr1	15507702	15508702
	Chr1	15514884	15515884
	Chr1	15515954	15516954
	Chr1	15523379	15524379
	Chr1	15523880	15524880
	Chr1	15524051	15525051
	Chr1	15524168	15525168
	Chr1	15526920	15527920
	Chr1	15528010	15529010
	Chr1	15532936	15533936
	Chr1	15533253	15534253
	Chr1	15586764	15587764
	Chr1	15587557	15588557
	Chr1	15678651	15679651
	Chr1	15682345	15683345
	Chr1	15683994	15684994
	Chr1	15694344	15695344
	Chr1	15694654	15695654
	Chr1	15697082	15698082
	Chr1	15698283	15699283
	Chr1	15735725	15736725
	Chr1	15850722	15851722
	Chr1	15930059	15931059
	Chr1	15931911	15932911
	Chr1	15943590	15944590
	Chr1	16061029	16062029
	Chr1	16084724	16085724
	Chr1	16106829	16107829
	Chr1	16114250	16115250
	Chr1	16114437	16115437
	Chr1	16114810	16115810
	Chr1	16121235	16122235
	Chr1	16122834	16123834
	Chr1	16124007	16125007
	Chr1	16125230	16126230
	Chr1	16125958	16126958
	Chr1	16126644	16127644
	Chr1	16158125	16159125
	Chr1	16160065	16161065
	Chr1	16173753	16174753
	Chr1	16211967	16212967
	Chr1	16212404	16213404
	Chr1	16265525	16266525
	Chr1	16275767	16276767
	Chr1	16275951	16276951
	Chr1	16321212	16322212
	Chr1	16330223	16331223
	Chr1	16339140	16340140
	Chr1	16339658	16340658
	Chr1	16393271	16394271
	Chr1	16439108	16440108
	Chr1	16470091	16471091
	Chr1	16478609	16479609
	Chr1	16479208	16480208
	Chr1	16480614	16481614
	Chr1	16481046	16482046
	Chr1	16481950	16482950
	Chr1	16482958	16483958
	Chr1	16484483	16485483
	Chr1	16490433	16491433
	Chr1	16493936	16494936
	Chr1	16506499	16507499
	Chr1	16508044	16509044
	Chr1	16532840	16533840
	Chr1	16564093	16565093
	Chr1	16676170	16677170
	Chr1	16692637	16693637
	Chr1	16735213	16736213
	Chr1	16735992	16736992
	Chr1	16751296	16752296
	Chr1	16825371	16826371
	Chr1	16871988	16872988
	Chr1	16917964	16918964
	Chr1	16946347	16947347
	Chr1	16947228	16948228
	Chr1	16968738	16969738
	Chr1	16969103	16970103
	Chr1	16975662	16976662
	Chr1	16977831	16978831
	Chr1	16982817	16983817
	Chr1	16984451	16985451
	Chr1	16984636	16985636
	Chr1	17002843	17003843
	Chr1	17005012	17006012
	Chr1	17023386	17024386
	Chr1	17023942	17024942
	Chr1	17024238	17025238
	Chr1	17027320	17028320
	Chr1	17028625	17029625
	Chr1	17053351	17054351
	Chr1	17074822	17075822
	Chr1	17075998	17076998
	Chr1	17076657	17077657
	Chr1	17081605	17082605
	Chr1	17083858	17084858
	Chr1	17090745	17091745
	Chr1	17091060	17092060
	Chr1	17091594	17092594
	Chr1	17092772	17093772
	Chr1	17092931	17093931
	Chr1	17093198	17094198
	Chr1	17187936	17188936
	Chr1	17230360	17231360
	Chr1	17231573	17232573
	Chr1	17255555	17256555
	Chr1	17256071	17257071
	Chr1	17287116	17288116
	Chr1	17337861	17338861
	Chr1	17378151	17379151
	Chr1	17449029	17450029
	Chr1	17764040	17765040
	Chr1	17764522	17765522
	Chr1	17765271	17766271
	Chr1	17865759	17866759
	Chr1	17866443	17867443
	Chr1	17890563	17891563
	Chr1	17890918	17891918
	Chr1	17898862	17899862
	Chr1	17902171	17903171
	Chr1	17906322	17907322
	Chr1	17907578	17908578
	Chr1	17914741	17915741
	Chr1	17916310	17917310
	Chr1	17917105	17918105
	Chr1	17918486	17919486
	Chr1	17918651	17919651
	Chr1	17932922	17933922
	Chr1	18454502	18455502
	Chr1	18611364	18612364
	Chr1	18642971	18643971
	Chr1	18806900	18807900
	Chr1	18807474	18808474
	Chr1	19220734	19221734
	Chr1	19226507	19227507
	Chr1	19227375	19228375
	Chr1	19239241	19240241
	Chr1	19248578	19249578
	Chr1	19263120	19264120
	Chr1	19264516	19265516
	Chr1	19267174	19268174
	Chr1	19267440	19268440
	Chr1	19268035	19269035
	Chr1	19274629	19275629
	Chr1	19275159	19276159
	Chr1	19276215	19277215
	Chr1	19276824	19277824
	Chr1	19281924	19282924
	Chr1	19283862	19284862
	Chr1	19333608	19334608
	Chr1	19337111	19338111
	Chr1	19338304	19339304
	Chr1	19338519	19339519
	Chr1	19339889	19340889
	Chr1	19369780	19370780
	Chr1	19371430	19372430
	Chr1	19371806	19372806
	Chr1	19456653	19457653
	Chr1	19465456	19466456
	Chr1	19528574	19529574
	Chr1	19528793	19529793
	Chr1	19536227	19537227
	Chr1	19549158	19550158
	Chr1	19577136	19578136
	Chr1	19578494	19579494
	Chr1	19595995	19596995
	Chr1	19596175	19597175
	Chr1	19641485	19642485
	Chr1	19664526	19665526
	Chr1	19710292	19711292
	Chr1	19713330	19714330
	Chr1	19717502	19718502
	Chr1	19736587	19737587
	Chr1	19751928	19752928
	Chr1	19752824	19753824
	Chr1	19753388	19754388
	Chr1	19756185	19757185
	Chr1	19756424	19757424
	Chr1	19756746	19757746
	Chr1	19762983	19763983
	Chr1	19764252	19765252
	Chr1	19764640	19765640
	Chr1	19766635	19767635
	Chr1	19772072	19773072
	Chr1	19794533	19795533
	Chr1	19813875	19814875
	Chr1	19941651	19942651
	Chr1	19945988	19946988
	Chr1	19949691	19950691
	Chr1	19966792	19967792
	Chr1	20125896	20126896
	Chr1	20141184	20142184
	Chr1	20142128	20143128
	Chr1	20244218	20245218
	Chr1	20247075	20248075
	Chr1	20247476	20248476
	Chr1	20247804	20248804
	Chr1	20249366	20250366
	Chr1	20249777	20250777
	Chr1	20250205	20251205
	Chr1	20251512	20252512
	Chr1	20252749	20253749
	Chr1	20253091	20254091
	Chr1	20301076	20302076
	Chr1	20301507	20302507
	Chr1	20307646	20308646
	Chr1	20308456	20309456
	Chr1	20313909	20314909
	Chr1	20314708	20315708
	Chr1	20478493	20479493
	Chr1	20799443	20800443
	Chr1	20802470	20803470
	Chr1	20807883	20808883
	Chr1	20809014	20810014
	Chr1	20876745	20877745
	Chr1	20938642	20939642
	Chr1	20939881	20940881
	Chr1	20959666	20960666
	Chr1	20960749	20961749
	Chr1	20988083	20989083
	Chr1	21059208	21060208
	Chr1	21110935	21111935
	Chr1	21112934	21113934
	Chr1	21139818	21140818
	Chr1	21139938	21140938
	Chr1	21140108	21141108
	Chr1	21222953	21223953
	Chr1	21223139	21224139
	Chr1	21348377	21349377
	Chr1	21348724	21349724
	Chr1	21350348	21351348
	Chr1	21359001	21360001
	Chr1	21415495	21416495
	Chr1	21441359	21442359
	Chr1	21443663	21444663
	Chr1	21452472	21453472
	Chr1	21574088	21575088
	Chr1	21574549	21575549
	Chr1	21575421	21576421
	Chr1	21578088	21579088
	Chr1	21587906	21588906
	Chr1	21588741	21589741
	Chr1	21588952	21589952
	Chr1	21595836	21596836
	Chr1	21597794	21598794
	Chr1	21602348	21603348
	Chr1	21602579	21603579
	Chr1	21637272	21638272
	Chr1	21645815	21646815
	Chr1	21650156	21651156
	Chr1	21650323	21651323
	Chr1	21650677	21651677
	Chr1	21650854	21651854
	Chr1	21652788	21653788
	Chr1	21653007	21654007
	Chr1	21653173	21654173
	Chr1	21655563	21656563
	Chr1	21658964	21659964
	Chr1	21660936	21661936
	Chr1	21661961	21662961
	Chr1	21664971	21665971
	Chr1	21671437	21672437
	Chr1	21863577	21864577
	Chr1	21863756	21864756
	Chr1	21863882	21864882
	Chr1	21864344	21865344
	Chr1	21949657	21950657
	Chr1	21957994	21958994
	Chr1	21958265	21959265
	Chr1	21964767	21965767
	Chr1	21993132	21994132
	Chr1	21993433	21994433
	Chr1	21994385	21995385
	Chr1	21994563	21995563
	Chr1	21994682	21995682
	Chr1	21994892	21995892
	Chr1	21995716	21996716
	Chr1	21996526	21997526
	Chr1	22031760	22032760
	Chr1	22063075	22064075
	Chr1	22102192	22103192
	Chr1	22104306	22105306
	Chr1	22109376	22110376
	Chr1	22181835	22182835
	Chr1	22182034	22183034
	Chr1	22188294	22189294
	Chr1	22224923	22225923
	Chr1	22225164	22226164
	Chr1	22228746	22229746
	Chr1	22237562	22238562
	Chr1	22246528	22247528
	Chr1	22247490	22248490
	Chr1	22248801	22249801
	Chr1	22252993	22253993
	Chr1	22253868	22254868
	Chr1	22256987	22257987
	Chr1	22257369	22258369
	Chr1	22257898	22258898
	Chr1	22259791	22260791
	Chr1	22261589	22262589
	Chr1	22263455	22264455
	Chr1	22282893	22283893
	Chr1	22283197	22284197
	Chr1	22299365	22300365
	Chr1	22300832	22301832
	Chr1	22323983	22324983
	Chr1	22324258	22325258
	Chr1	22349057	22350057
	Chr1	22350591	22351591
	Chr1	22374749	22375749
	Chr1	22379049	22380049
	Chr1	22380526	22381526
	Chr1	22738748	22739748
	Chr1	22740422	22741422
	Chr1	22776926	22777926
	Chr1	22778766	22779766
	Chr1	22787236	22788236
	Chr1	23289087	23290087
	Chr1	23289455	23290455
	Chr1	23344957	23345957
	Chr1	23345765	23346765
	Chr1	23441319	23442319
	Chr1	23442386	23443386
	Chr1	23449546	23450546
	Chr1	23449665	23450665
	Chr1	23495806	23496806
	Chr1	23496108	23497108
	Chr1	23513911	23514911
	Chr1	23514663	23515663
	Chr1	23548500	23549500
	Chr1	23549544	23550544
	Chr1	23549717	23550717
	Chr1	23629790	23630790
	Chr1	23657964	23658964
	Chr1	23670351	23671351
	Chr1	23671300	23672300
	Chr1	23703345	23704345
	Chr1	23710918	23711918
	Chr1	23747912	23748912
	Chr1	23749332	23750332
	Chr1	23751244	23752244
	Chr1	23785560	23786560
	Chr1	23787242	23788242
	Chr1	23796981	23797981
	Chr1	23798338	23799338
	Chr1	23799088	23800088
	Chr1	23805147	23806147
	Chr1	23810462	23811462
	Chr1	23823312	23824312
	Chr1	23823635	23824635
	Chr1	23857131	23858131
	Chr1	23880761	23881761
	Chr1	23882608	23883608
	Chr1	23884417	23885417
	Chr1	23890141	23891141
	Chr1	23894221	23895221
	Chr1	23903253	23904253
	Chr1	23917987	23918987
	Chr1	23919627	23920627
	Chr1	23919790	23920790
	Chr1	23921023	23922023
	Chr1	24031277	24032277
	Chr1	24070837	24071837
	Chr1	24091963	24092963
	Chr1	24106126	24107126
	Chr1	24116271	24117271
	Chr1	24117781	24118781
	Chr1	24118704	24119704
	Chr1	24119131	24120131
	Chr1	24122042	24123042
	Chr1	24126333	24127333
	Chr1	24127472	24128472
	Chr1	24128945	24129945
	Chr1	24129786	24130786
	Chr1	24130340	24131340
	Chr1	24135689	24136689
	Chr1	24135904	24136904
	Chr1	24164715	24165715
	Chr1	24165057	24166057
	Chr1	24306252	24307252
	Chr1	24306891	24307891
	Chr1	24327782	24328782
	Chr1	24329538	24330538
	Chr1	24338236	24339236
	Chr1	24344601	24345601
	Chr1	24345033	24346033
	Chr1	24347733	24348733
	Chr1	24349461	24350461
	Chr1	24354255	24355255
	Chr1	24431830	24432830
	Chr1	24432974	24433974
	Chr1	24433100	24434100
	Chr1	24433541	24434541
	Chr1	24434524	24435524
	Chr1	24444602	24445602
	Chr1	24446273	24447273
	Chr1	24467926	24468926
	Chr1	24491731	24492731
	Chr1	24510468	24511468
	Chr1	24516563	24517563
	Chr1	24536380	24537380
	Chr1	24739755	24740755
	Chr1	24740458	24741458
	Chr1	24740885	24741885
	Chr1	24828794	24829794
	Chr1	24844577	24845577
	Chr1	24861342	24862342
	Chr1	24866967	24867967
	Chr1	24867381	24868381
	Chr1	24867812	24868812
	Chr1	24868100	24869100
	Chr1	24875250	24876250
	Chr1	24875381	24876381
	Chr1	24878321	24879321
	Chr1	24883831	24884831
	Chr1	24883968	24884968
	Chr1	24884636	24885636
	Chr1	24884879	24885879
	Chr1	24885301	24886301
	Chr1	24894093	24895093
	Chr1	24931770	24932770
	Chr1	24945608	24946608
	Chr1	24966427	24967427
	Chr1	24968078	24969078
	Chr1	25030794	25031794
	Chr1	25031623	25032623
	Chr1	25033829	25034829
	Chr1	25045026	25046026
	Chr1	25046317	25047317
	Chr1	25050942	25051942
	Chr1	25056243	25057243
	Chr1	25056583	25057583
	Chr1	25072790	25073790
	Chr1	25093554	25094554
	Chr1	25126629	25127629
	Chr1	25189696	25190696
	Chr1	25190590	25191590
	Chr1	25237119	25238119
	Chr1	25237686	25238686
	Chr1	25240621	25241621
	Chr1	25242192	25243192
	Chr1	25242705	25243705
	Chr1	25348641	25349641
	Chr1	25452826	25453826
	Chr1	25466492	25467492
	Chr1	25493756	25494756
	Chr1	25494328	25495328
	Chr1	25500508	25501508
	Chr1	25501157	25502157
	Chr1	25518909	25519909
	Chr1	25519311	25520311
	Chr1	25523829	25524829
	Chr1	25524087	25525087
	Chr1	25524787	25525787
	Chr1	25525113	25526113
	Chr1	25538909	25539909
	Chr1	25559260	25560260
	Chr1	25594006	25595006
	Chr1	25594175	25595175
	Chr1	25756827	25757827
	Chr1	25785183	25786183
	Chr1	25869703	25870703
	Chr1	25870933	25871933
	Chr1	25875372	25876372
	Chr1	25875830	25876830
	Chr1	25876866	25877866
	Chr1	26099560	26100560
	Chr1	26151763	26152763
	Chr1	26186129	26187129
	Chr1	26187543	26188543
	Chr1	26188066	26189066
	Chr1	26189646	26190646
	Chr1	26197263	26198263
	Chr1	26201109	26202109
	Chr1	26201715	26202715
	Chr1	26216711	26217711
	Chr1	26231201	26232201
	Chr1	26232062	26233062
	Chr1	26322905	26323905
	Chr1	26323018	26324018
	Chr1	26323231	26324231
	Chr1	26354612	26355612
	Chr1	26362608	26363608
	Chr1	26437641	26438641
	Chr1	26496660	26497660
	Chr1	26503375	26504375
	Chr1	26504084	26505084
	Chr1	26561239	26562239
	Chr1	26654244	26655244
	Chr1	26677017	26678017
	Chr1	26677906	26678906
	Chr1	26680276	26681276
	Chr1	26683095	26684095
	Chr1	26826915	26827915
	Chr1	26854864	26855864
	Chr1	26855903	26856903
	Chr1	26857279	26858279
	Chr1	26861362	26862362
	Chr1	26867980	26868980
	Chr1	26881776	26882776
	Chr1	27020379	27021379
	Chr1	27021834	27022834
	Chr1	27023001	27024001
	Chr1	27023246	27024246
	Chr1	27024114	27025114
	Chr1	27031929	27032929
	Chr1	27032550	27033550
	Chr1	27049649	27050649
	Chr1	27110163	27111163
	Chr1	27112715	27113715
	Chr1	27113051	27114051
	Chr1	27152637	27153637
	Chr1	27157708	27158708
	Chr1	27165003	27166003
	Chr1	27165389	27166389
	Chr1	27166815	27167815
	Chr1	27175544	27176544
	Chr1	27179258	27180258
	Chr1	27189090	27190090
	Chr1	27190251	27191251
	Chr1	27191048	27192048
	Chr1	27191669	27192669
	Chr1	27204136	27205136
	Chr1	27207779	27208779
	Chr1	27208116	27209116
	Chr1	27230452	27231452
	Chr1	27236194	27237194
	Chr1	27236731	27237731
	Chr1	27241424	27242424
	Chr1	27264357	27265357
	Chr1	27270273	27271273
	Chr1	27273195	27274195
	Chr1	27274163	27275163
	Chr1	27274396	27275396
	Chr1	27286111	27287111
	Chr1	27287736	27288736
	Chr1	27288039	27289039
	Chr1	27292999	27293999
	Chr1	27297023	27298023
	Chr1	27297237	27298237
	Chr1	27316751	27317751
	Chr1	27317561	27318561
	Chr1	27318569	27319569
	Chr1	27323794	27324794
	Chr1	27326855	27327855
	Chr1	27327750	27328750
	Chr1	27327979	27328979
	Chr1	27328313	27329313
	Chr1	27330238	27331238
	Chr1	27339020	27340020
	Chr1	27353805	27354805
	Chr1	27425200	27426200
	Chr1	27425427	27426427
	Chr1	27425743	27426743
	Chr1	27448834	27449834
	Chr1	27463895	27464895
	Chr1	27481245	27482245
	Chr1	27481783	27482783
	Chr1	27560697	27561697
	Chr1	27648885	27649885
	Chr1	27649302	27650302
	Chr1	27683434	27684434
	Chr1	27683796	27684796
	Chr1	27690767	27691767
	Chr1	27693205	27694205
	Chr1	27718693	27719693
	Chr1	27822780	27823780
	Chr1	27830710	27831710
	Chr1	27834412	27835412
	Chr1	27843993	27844993
	Chr1	27844331	27845331
	Chr1	27844629	27845629
	Chr1	27846867	27847867
	Chr1	27848986	27849986
	Chr1	27852091	27853091
	Chr1	27852969	27853969
	Chr1	27853360	27854360
	Chr1	27868573	27869573
	Chr1	27868903	27869903
	Chr1	27869105	27870105
	Chr1	27880532	27881532
	Chr1	27883150	27884150
	Chr1	27889922	27890922
	Chr1	27893598	27894598
	Chr1	27895787	27896787
	Chr1	27896021	27897021
	Chr1	27896796	27897796
	Chr1	27897533	27898533
	Chr1	27897958	27898958
	Chr1	27898939	27899939
	Chr1	27900578	27901578
	Chr1	27902040	27903040
	Chr1	27916193	27917193
	Chr1	27925388	27926388
	Chr1	27927866	27928866
	Chr1	27928014	27929014
	Chr1	27928336	27929336
	Chr1	27929374	27930374
	Chr1	27932900	27933900
	Chr1	27933520	27934520
	Chr1	27947619	27948619
	Chr1	27976776	27977776
	Chr1	27976956	27977956
	Chr1	27998378	27999378
	Chr1	28008582	28009582
	Chr1	28050178	28051178
	Chr1	28050645	28051645
	Chr1	28052007	28053007
	Chr1	28099303	28100303
	Chr1	28100225	28101225
	Chr1	28143421	28144421
	Chr1	28180537	28181537
	Chr1	28269531	28270531
	Chr1	28405396	28406396
	Chr1	28496298	28497298
	Chr1	28499217	28500217
	Chr1	28531400	28532400
	Chr1	28559823	28560823
	Chr1	28572716	28573716
	Chr1	28572861	28573861
	Chr1	28575144	28576144
	Chr1	28575671	28576671
	Chr1	28611115	28612115
	Chr1	28617101	28618101
	Chr1	28622148	28623148
	Chr1	28622852	28623852
	Chr1	28640161	28641161
	Chr1	28655409	28656409
	Chr1	28655659	28656659
	Chr1	28672558	28673558
	Chr1	28676960	28677960
	Chr1	28678360	28679360
	Chr1	28696007	28697007
	Chr1	28701618	28702618
	Chr1	28701777	28702777
	Chr1	28702432	28703432
	Chr1	28702585	28703585
	Chr1	28763563	28764563
	Chr1	28764064	28765064
	Chr1	28773847	28774847
	Chr1	28796393	28797393
	Chr1	28827170	28828170
	Chr1	28832470	28833470
	Chr1	28836060	28837060
	Chr1	28836868	28837868
	Chr1	28837026	28838026
	Chr1	28838278	28839278
	Chr1	28839684	28840684
	Chr1	28846388	28847388
	Chr1	28847677	28848677
	Chr1	28853098	28854098
	Chr1	28853266	28854266
	Chr1	28878576	28879576
	Chr1	28908699	28909699
	Chr1	28913160	28914160
	Chr1	28918114	28919114
	Chr1	28919644	28920644
	Chr1	28919978	28920978
	Chr1	28960351	28961351
	Chr1	28960631	28961631
	Chr1	28972329	28973329
	Chr1	28972537	28973537
	Chr1	28994281	28995281
	Chr1	28995075	28996075
	Chr1	29051058	29052058
	Chr1	29051263	29052263
	Chr1	29051551	29052551
	Chr1	29059923	29060923
	Chr1	29060315	29061315
	Chr1	29082094	29083094
	Chr1	29198131	29199131
	Chr1	29210458	29211458
	Chr1	29210985	29211985
	Chr1	29212510	29213510
	Chr1	29212736	29213736
	Chr1	29214371	29215371
	Chr1	29253067	29254067
	Chr1	29292886	29293886
	Chr1	29298589	29299589
	Chr1	29432081	29433081
	Chr1	29450530	29451530
	Chr1	29472125	29473125
	Chr1	29503832	29504832
	Chr1	29507732	29508732
	Chr1	29512122	29513122
	Chr1	29512491	29513491
	Chr1	29512672	29513672
	Chr1	29562928	29563928
	Chr1	29564009	29565009
	Chr1	29565384	29566384
	Chr1	29798083	29799083
	Chr1	31212750	31213750
	Chr1	31255556	31256556
	Chr1	31255934	31256934
	Chr1	31259141	31260141
	Chr1	31296707	31297707
	Chr1	31319952	31320952
	Chr1	31374730	31375730
	Chr1	31439205	31440205
	Chr1	31449568	31450568
	Chr1	31472069	31473069
	Chr1	31497218	31498218
	Chr1	31497688	31498688
	Chr1	31512621	31513621
	Chr1	31535194	31536194
	Chr1	31535414	31536414
	Chr1	31536242	31537242
	Chr1	31536678	31537678
	Chr1	31537098	31538098
	Chr1	31572195	31573195
	Chr1	31573697	31574697
	Chr1	31574831	31575831
	Chr1	31626892	31627892
	Chr1	31627564	31628564
	Chr1	31643320	31644320
	Chr1	31844225	31845225
	Chr1	31846080	31847080
	Chr1	31889654	31890654
	Chr1	31894063	31895063
	Chr1	31894728	31895728
	Chr1	31894926	31895926
	Chr1	31895163	31896163
	Chr1	31904457	31905457
	Chr1	31906370	31907370
	Chr1	31906841	31907841
	Chr1	31914504	31915504
	Chr1	31914826	31915826
	Chr1	31915096	31916096
	Chr1	31915290	31916290
	Chr1	31917502	31918502
	Chr1	31922312	31923312
	Chr1	31944080	31945080
	Chr1	31955141	31956141
	Chr1	31977176	31978176
	Chr1	31989039	31990039
	Chr1	31989492	31990492
	Chr1	32013831	32014831
	Chr1	32014013	32015013
	Chr1	32014454	32015454
	Chr1	32037967	32038967
	Chr1	32038206	32039206
	Chr1	32039185	32040185
	Chr1	32041218	32042218
	Chr1	32053018	32054018
	Chr1	32166325	32167325
	Chr1	32169691	32170691
	Chr1	32169960	32170960
	Chr1	32320686	32321686
	Chr1	32341184	32342184
	Chr1	32346238	32347238
	Chr1	32346895	32347895
	Chr1	32376304	32377304
	Chr1	32397745	32398745
	Chr1	32402947	32403947
	Chr1	32403625	32404625
	Chr1	32420025	32421025
	Chr1	32421177	32422177
	Chr1	32536859	32537859
	Chr1	32538218	32539218
	Chr1	32569432	32570432
	Chr1	32574110	32575110
	Chr1	32604196	32605196
	Chr1	32608060	32609060
	Chr1	32643663	32644663
	Chr1	32645076	32646076
	Chr1	32666329	32667329
	Chr1	32666713	32667713
	Chr1	32674142	32675142
	Chr1	32688802	32689802
	Chr1	32701434	32702434
	Chr1	32713463	32714463
	Chr1	32715294	32716294
	Chr1	32715978	32716978
	Chr1	32719115	32720115
	Chr1	32720631	32721631
	Chr1	32756356	32757356
	Chr1	32777012	32778012
	Chr1	32786980	32787980
	Chr1	32797493	32798493
	Chr1	32797913	32798913
	Chr1	32800463	32801463
	Chr1	32801405	32802405
	Chr1	32804007	32805007
	Chr1	32810740	32811740
	Chr1	32814532	32815532
	Chr1	32816814	32817814
	Chr1	32823404	32824404
	Chr1	32859735	32860735
	Chr1	32913667	32914667
	Chr1	32914214	32915214
	Chr1	32965567	32966567
	Chr1	32965936	32966936
	Chr1	33012913	33013913
	Chr1	33109724	33110724
	Chr1	33160336	33161336
	Chr1	33177508	33178508
	Chr1	33181228	33182228
	Chr1	33181944	33182944
	Chr1	33182259	33183259
	Chr1	33182419	33183419
	Chr1	33183085	33184085
	Chr1	33183717	33184717
	Chr1	33190378	33191378
	Chr1	33199230	33200230
	Chr1	33202648	33203648
	Chr1	33206896	33207896
	Chr1	33225161	33226161
	Chr1	33226097	33227097
	Chr1	33226302	33227302
	Chr1	33226452	33227452
	Chr1	33226815	33227815
	Chr1	33279566	33280566
	Chr1	33282850	33283850
	Chr1	33399175	33400175
	Chr1	33401294	33402294
	Chr1	33414393	33415393
	Chr1	33429610	33430610
	Chr1	33508585	33509585
	Chr1	33510528	33511528
	Chr1	33547250	33548250
	Chr1	33709461	33710461
	Chr1	33720494	33721494
	Chr1	33721515	33722515
	Chr1	33723265	33724265
	Chr1	33724212	33725212
	Chr1	33731235	33732235
	Chr1	33760569	33761569
	Chr1	33760743	33761743
	Chr1	33807262	33808262
	Chr1	33807628	33808628
	Chr1	33812543	33813543
	Chr1	33814026	33815026
	Chr1	33815023	33816023
	Chr1	33896005	33897005
	Chr1	35309564	35310564
	Chr1	35324324	35325324
	Chr1	35324963	35325963
	Chr1	35496338	35497338
	Chr1	35544135	35545135
	Chr1	35644312	35645312
	Chr1	35708823	35709823
	Chr1	35708987	35709987
	Chr1	35913709	35914709
	Chr1	36010313	36011313
	Chr1	36021496	36022496
	Chr1	36022543	36023543
	Chr1	36040901	36041901
	Chr1	36041295	36042295
	Chr1	36058511	36059511
	Chr1	36102636	36103636
	Chr1	36185979	36186979
	Chr1	36273213	36274213
	Chr1	36273759	36274759
	Chr1	36549231	36550231
	Chr1	36549499	36550499
	Chr1	36553998	36554998
	Chr1	36616029	36617029
	Chr1	36653269	36654269
	Chr1	36668997	36669997
	Chr1	36669345	36670345
	Chr1	36683452	36684452
	Chr1	36697759	36698759
	Chr1	36704829	36705829
	Chr1	36705373	36706373
	Chr1	36713810	36714810
	Chr1	36720334	36721334
	Chr1	36762371	36763371
	Chr1	36765195	36766195
	Chr1	36769300	36770300
	Chr1	36789000	36790000
	Chr1	36789577	36790577
	Chr1	36834341	36835341
	Chr1	36839146	36840146
	Chr1	36839834	36840834
	Chr1	36845445	36846445
	Chr1	36849814	36850814
	Chr1	36886062	36887062
	Chr1	36925656	36926656
	Chr1	36937340	36938340
	Chr1	36947899	36948899
	Chr1	36948085	36949085
	Chr1	36950681	36951681
	Chr1	36950899	36951899
	Chr1	36952096	36953096
	Chr1	37927173	37928173
	Chr1	37936923	37937923
	Chr1	37939739	37940739
	Chr1	37941801	37942801
	Chr1	37942844	37943844
	Chr1	37944095	37945095
	Chr1	37944357	37945357
	Chr1	37944971	37945971
	Chr1	37946805	37947805
	Chr1	37979825	37980825
	Chr1	37995183	37996183
	Chr1	37999446	38000446
	Chr1	38001225	38002225
	Chr1	38002564	38003564
	Chr1	38009813	38010813
	Chr1	38027910	38028910
	Chr1	38154970	38155970
	Chr1	38155125	38156125
	Chr1	38156280	38157280
	Chr1	38189009	38190009
	Chr1	38259414	38260414
	Chr1	38260731	38261731
	Chr1	38273361	38274361
	Chr1	38327737	38328737
	Chr1	38380120	38381120
	Chr1	38395968	38396968
	Chr1	38397020	38398020
	Chr1	38405779	38406779
	Chr1	38411004	38412004
	Chr1	38455762	38456762
	Chr1	38464716	38465716
	Chr1	38465339	38466339
	Chr1	38466312	38467312
	Chr1	38470845	38471845
	Chr1	38471749	38472749
	Chr1	38474465	38475465
	Chr1	38477890	38478890
	Chr1	38548314	38549314
	Chr1	38548535	38549535
	Chr1	39353483	39354483
	Chr1	39353815	39354815
	Chr1	39354304	39355304
	Chr1	39357107	39358107
	Chr1	39402403	39403403
	Chr1	39405027	39406027
	Chr1	39405711	39406711
	Chr1	39408022	39409022
	Chr1	39408328	39409328
	Chr1	39426839	39427839
	Chr1	39427762	39428762
	Chr1	39434506	39435506
	Chr1	39436130	39437130
	Chr1	39452069	39453069
	Chr1	39455872	39456872
	Chr1	39456318	39457318
	Chr1	39458097	39459097
	Chr1	39466372	39467372
	Chr1	39481918	39482918
	Chr1	39541458	39542458
	Chr1	39541834	39542834
	Chr1	39542169	39543169
	Chr1	39570701	39571701
	Chr1	39571777	39572777
	Chr1	39577217	39578217
	Chr1	39581162	39582162
	Chr1	39582616	39583616
	Chr1	39592890	39593890
	Chr1	39598349	39599349
	Chr1	39620227	39621227
	Chr1	39623842	39624842
	Chr1	39624593	39625593
	Chr1	39633231	39634231
	Chr1	39643868	39644868
	Chr1	39649130	39650130
	Chr1	39657646	39658646
	Chr1	39679537	39680537
	Chr1	39680979	39681979
	Chr1	39686597	39687597
	Chr1	39748170	39749170
	Chr1	39843663	39844663
	Chr1	39863579	39864579
	Chr1	39864058	39865058
	Chr1	39873128	39874128
	Chr1	39874838	39875838
	Chr1	40031830	40032830
	Chr1	40032121	40033121
	Chr1	40033557	40034557
	Chr1	40041963	40042963
	Chr1	40300544	40301544
	Chr1	40310971	40311971
	Chr1	40311425	40312425
	Chr1	40317547	40318547
	Chr1	40317845	40318845
	Chr1	40364294	40365294
	Chr1	40366907	40367907
	Chr1	40399655	40400655
	Chr1	40504615	40505615
	Chr1	40516640	40517640
	Chr1	40523975	40524975
	Chr1	40778959	40779959
	Chr1	40779430	40780430
	Chr1	40780002	40781002
	Chr1	40780561	40781561
	Chr1	40804280	40805280
	Chr1	40849627	40850627
	Chr1	40855301	40856301
	Chr1	40887122	40888122
	Chr1	40916206	40917206
	Chr1	41001109	41002109
	Chr1	41111659	41112659
	Chr1	41157903	41158903
	Chr1	41158135	41159135
	Chr1	41176069	41177069
	Chr1	41181035	41182035
	Chr1	41205413	41206413
	Chr1	41223232	41224232
	Chr1	41223400	41224400
	Chr1	41223957	41224957
	Chr1	41290387	41291387
	Chr1	41290734	41291734
	Chr1	41326231	41327231
	Chr1	41326791	41327791
	Chr1	41327709	41328709
	Chr1	41331711	41332711
	Chr1	41372463	41373463
	Chr1	41384928	41385928
	Chr1	41405010	41406010
	Chr1	41445047	41446047
	Chr1	41446149	41447149
	Chr1	41446316	41447316
	Chr1	41453604	41454604
	Chr1	41574657	41575657
	Chr1	41588386	41589386
	Chr1	41588578	41589578
	Chr1	41616305	41617305
	Chr1	41703804	41704804
	Chr1	41705039	41706039
	Chr1	41705407	41706407
	Chr1	41707200	41708200
	Chr1	42637833	42638833
	Chr1	42679859	42680859
	Chr1	42780815	42781815
	Chr1	42800265	42801265
	Chr1	42801084	42802084
	Chr1	42801320	42802320
	Chr1	43123552	43124552
	Chr1	43147878	43148878
	Chr1	43186220	43187220
	Chr1	43204836	43205836
	Chr1	43205019	43206019
	Chr1	43206628	43207628
	Chr1	43231198	43232198
	Chr1	43232127	43233127
	Chr1	43282262	43283262
	Chr1	43390605	43391605
	Chr1	43395625	43396625
	Chr1	43396155	43397155
	Chr1	43396402	43397402
	Chr1	43396562	43397562
	Chr1	43397144	43398144
	Chr1	43406082	43407082
	Chr1	43406326	43407326
	Chr1	43407045	43408045
	Chr1	43411560	43412560
	Chr1	43413282	43414282
	Chr1	43413480	43414480
	Chr1	43417690	43418690
	Chr1	43418551	43419551
	Chr1	43418732	43419732
	Chr1	43418889	43419889
	Chr1	43422160	43423160
	Chr1	43422503	43423503
	Chr1	43423360	43424360
	Chr1	43424642	43425642
	Chr1	43427059	43428059
	Chr1	43428092	43429092
	Chr1	43428691	43429691
	Chr1	43428911	43429911
	Chr1	43432388	43433388
	Chr1	43445475	43446475
	Chr1	43457870	43458870
	Chr1	43473902	43474902
	Chr1	43476321	43477321
	Chr1	43497000	43498000
	Chr1	43499586	43500586
	Chr1	43504612	43505612
	Chr1	43510273	43511273
	Chr1	43521385	43522385
	Chr1	43523811	43524811
	Chr1	43529095	43530095
	Chr1	43538823	43539823
	Chr1	43538965	43539965
	Chr1	43672192	43673192
	Chr1	43741677	43742677
	Chr1	43742017	43743017
	Chr1	43747788	43748788
	Chr1	43805952	43806952
	Chr1	43809697	43810697
	Chr1	43814395	43815395
	Chr1	43828156	43829156
	Chr1	43828659	43829659
	Chr1	43831555	43832555
	Chr1	43832051	43833051
	Chr1	43833942	43834942
	Chr1	43930078	43931078
	Chr1	43930590	43931590
	Chr1	43931111	43932111
	Chr1	43996526	43997526
	Chr1	43997528	43998528
	Chr1	44007286	44008286
	Chr1	44010573	44011573
	Chr1	44010764	44011764
	Chr1	44047597	44048597
	Chr1	44055735	44056735
	Chr1	44171943	44172943
	Chr1	44172751	44173751
	Chr1	44174441	44175441
	Chr1	44222798	44223798
	Chr1	44223051	44224051
	Chr1	44252331	44253331
	Chr1	44401104	44402104
	Chr1	44412796	44413796
	Chr1	44413448	44414448
	Chr1	44443445	44444445
	Chr1	44445193	44446193
	Chr1	44446584	44447584
	Chr1	44446875	44447875
	Chr1	44452328	44453328
	Chr1	44452489	44453489
	Chr1	44456194	44457194
	Chr1	44456878	44457878
	Chr1	44475109	44476109
	Chr1	44497865	44498865
	Chr1	44704921	44705921
	Chr1	44747746	44748746
	Chr1	44747989	44748989
	Chr1	44748206	44749206
	Chr1	44748921	44749921
	Chr1	44761508	44762508
	Chr1	44763297	44764297
	Chr1	44763472	44764472
	Chr1	44793161	44794161
	Chr1	44793487	44794487
	Chr1	44866819	44867819
	Chr1	44867145	44868145
	Chr1	45097227	45098227
	Chr1	45121271	45122271
	Chr1	45125579	45126579
	Chr1	45139563	45140563
	Chr1	45147382	45148382
	Chr1	45165905	45166905
	Chr1	45166474	45167474
	Chr1	45173283	45174283
	Chr1	45173686	45174686
	Chr1	45195383	45196383
	Chr1	45196196	45197196
	Chr1	45197431	45198431
	Chr1	45204450	45205450
	Chr1	45236574	45237574
	Chr1	45241869	45242869
	Chr1	45242525	45243525
	Chr1	45265394	45266394
	Chr1	45270654	45271654
	Chr1	45271217	45272217
	Chr1	45272092	45273092
	Chr1	45273534	45274534
	Chr1	45277119	45278119
	Chr1	45278185	45279185
	Chr1	45278309	45279309
	Chr1	45292068	45293068
	Chr1	45412155	45413155
	Chr1	45414583	45415583
	Chr1	45478032	45479032
	Chr1	45572153	45573153
	Chr1	45599783	45600783
	Chr1	45637356	45638356
	Chr1	45671339	45672339
	Chr1	45711987	45712987
	Chr1	45712114	45713114
	Chr1	45731352	45732352
	Chr1	45731699	45732699
	Chr1	45740452	45741452
	Chr1	45763183	45764183
	Chr1	45769186	45770186
	Chr1	45801208	45802208
	Chr1	45804743	45805743
	Chr1	45808319	45809319
	Chr1	45821155	45822155
	Chr1	45821589	45822589
	Chr1	45862682	45863682
	Chr1	45865419	45866419
	Chr1	45963722	45964722
	Chr1	45966049	45967049
	Chr1	45966311	45967311
	Chr1	45967475	45968475
	Chr1	45975190	45976190
	Chr1	45975389	45976389
	Chr1	45980428	45981428
	Chr1	45984385	45985385
	Chr1	45987631	45988631
	Chr1	45991491	45992491
	Chr1	46008040	46009040
	Chr1	46010652	46011652
	Chr1	46010909	46011909
	Chr1	46019560	46020560
	Chr1	46021468	46022468
	Chr1	46062579	46063579
	Chr1	46070401	46071401
	Chr1	46109456	46110456
	Chr1	46123481	46124481
	Chr1	46150598	46151598
	Chr1	46215291	46216291
	Chr1	46217714	46218714
	Chr1	46218000	46219000
	Chr1	46267785	46268785
	Chr1	46268144	46269144
	Chr1	46268449	46269449
	Chr1	46275119	46276119
	Chr1	46288006	46289006
	Chr1	46294213	46295213
	Chr1	46308899	46309899
	Chr1	46322710	46323710
	Chr1	46333058	46334058
	Chr1	46336994	46337994
	Chr1	46337503	46338503
	Chr1	46350134	46351134
	Chr1	46357817	46358817
	Chr1	46419902	46420902
	Chr1	46434722	46435722
	Chr1	46440762	46441762
	Chr1	46468697	46469697
	Chr1	46663243	46664243
	Chr1	46708148	46709148
	Chr1	46709624	46710624
	Chr1	46713618	46714618
	Chr1	46713840	46714840
	Chr1	46714072	46715072
	Chr1	46767821	46768821
	Chr1	46810647	46811647
	Chr1	46867397	46868397
	Chr1	47133484	47134484
	Chr1	47184289	47185289
	Chr1	47651565	47652565
	Chr1	47652951	47653951
	Chr1	47656379	47657379
	Chr1	47657965	47658965
	Chr1	47681719	47682719
	Chr1	47719455	47720455
	Chr1	47778818	47779818
	Chr1	47779801	47780801
	Chr1	47789148	47790148
	Chr1	47843577	47844577
	Chr1	47844965	47845965
	Chr1	47845994	47846994
	Chr1	47855102	47856102
	Chr1	47856217	47857217
	Chr1	47902889	47903889
	Chr1	48162407	48163407
	Chr1	48285629	48286629
	Chr1	48303267	48304267
	Chr1	48306219	48307219
	Chr1	48318423	48319423
	Chr1	48333163	48334163
	Chr1	48337312	48338312
	Chr1	48338163	48339163
	Chr1	48341660	48342660
	Chr1	48358821	48359821
	Chr1	48377247	48378247
	Chr1	48378630	48379630
	Chr1	48383820	48384820
	Chr1	48688028	48689028
	Chr1	48707552	48708552
	Chr1	48707706	48708706
	Chr1	48871381	48872381
	Chr1	48937268	48938268
	Chr1	50680139	50681139
	Chr1	50940287	50941287
	Chr1	50992345	50993345
	Chr1	50992754	50993754
	Chr1	50993127	50994127
	Chr1	50993371	50994371
	Chr1	51110127	51111127
	Chr1	51110281	51111281
	Chr1	51318681	51319681
	Chr1	51336896	51337896
	Chr1	51425308	51426308
	Chr1	51433576	51434576
	Chr1	51442196	51443196
	Chr1	51442389	51443389
	Chr1	51443106	51444106
[truncated: 61,573 more rows]

## Sheet: silencers in K562
Chromosome	start	end
Chr1	237246	238246
Chr1	521079	522079
Chr1	567181	568181
Chr1	777803	778803
Chr1	824711	825711
Chr1	836436	837436
Chr1	841924	842924
Chr1	853736	854736
Chr1	856143	857143
Chr1	857627	858627
Chr1	874119	875119
Chr1	904404	905404
Chr1	1000736	1001736
Chr1	1045780	1046780
Chr1	1047573	1048573
Chr1	1048310	1049310
Chr1	1058234	1059234
Chr1	1110220	1111220
Chr1	1210890	1211890
Chr1	1215444	1216444
Chr1	1225219	1226219
Chr1	1235249	1236249
Chr1	1241767	1242767
Chr1	1264519	1265519
Chr1	1295611	1296611
Chr1	1333088	1334088
Chr1	1335872	1336872
Chr1	1336333	1337333
Chr1	1337085	1338085
Chr1	1338691	1339691
Chr1	1375979	1376979
Chr1	1483812	1484812
Chr1	1486032	1487032
Chr1	1489969	1490969
Chr1	1494122	1495122
Chr1	1521079	1522079
Chr1	1521263	1522263
Chr1	1545178	1546178
Chr1	1555137	1556137
Chr1	1627833	1628833
Chr1	1635891	1636891
Chr1	1679695	1680695
Chr1	1691603	1692603
Chr1	1706775	1707775
Chr1	1707174	1708174
Chr1	1711293	1712293
Chr1	1711842	1712842
Chr1	1712256	1713256
Chr1	1720191	1721191
Chr1	1778666	1779666
Chr1	1830311	1831311
Chr1	1837336	1838336
Chr1	1875197	1876197
Chr1	1901764	1902764
Chr1	1977585	1978585
Chr1	2019528	2020528
Chr1	2063396	2064396
Chr1	2082338	2083338
Chr1	2090287	2091287
Chr1	2110703	2111703
Chr1	2173045	2174045
Chr1	2221265	2222265
Chr1	2299483	2300483
Chr1	2313699	2314699
Chr1	2326246	2327246
Chr1	2336137	2337137
Chr1	2344835	2345835
Chr1	2402266	2403266
Chr1	2414252	2415252
Chr1	2470501	2471501
Chr1	2473089	2474089
Chr1	2479215	2480215
Chr1	2528667	2529667
Chr1	2556898	2557898
Chr1	2583365	2584365
Chr1	2585461	2586461
Chr1	2585691	2586691
Chr1	2586571	2587571
Chr1	2615077	2616077
Chr1	2615840	2616840
Chr1	2628721	2629721
Chr1	3369417	3370417
Chr1	3491772	3492772
Chr1	3535231	3536231
Chr1	3582758	3583758
Chr1	3588104	3589104
Chr1	3595295	3596295
Chr1	3597288	3598288
Chr1	3664422	3665422
Chr1	3664668	3665668
Chr1	3672683	3673683
Chr1	3676048	3677048
Chr1	3689571	3690571
Chr1	3694109	3695109
Chr1	3695077	3696077
Chr1	3695999	3696999
Chr1	3724004	3725004
Chr1	3724214	3725214
Chr1	3727559	3728559
Chr1	3822373	3823373
Chr1	3825406	3826406
Chr1	3827036	3828036
Chr1	4035603	4036603
Chr1	4035972	4036972
Chr1	4051889	4052889
Chr1	4066302	4067302
Chr1	4237230	4238230
Chr1	4391338	4392338
Chr1	4508450	4509450
Chr1	4615289	4616289
Chr1	4644985	4645985
Chr1	4837849	4838849
Chr1	5515801	5516801
Chr1	5569616	5570616
Chr1	5611335	5612335
Chr1	5748230	5749230
Chr1	5811994	5812994
Chr1	5906998	5907998
Chr1	5975551	5976551
Chr1	6009491	6010491
Chr1	6021427	6022427
Chr1	6040164	6041164
Chr1	6069217	6070217
Chr1	6094076	6095076
Chr1	6101194	6102194
Chr1	6217508	6218508
Chr1	6221405	6222405
Chr1	6232304	6233304
Chr1	6243213	6244213
Chr1	6243709	6244709
Chr1	6244050	6245050
Chr1	6245525	6246525
Chr1	6247416	6248416
Chr1	6252705	6253705
Chr1	6280129	6281129
Chr1	6281228	6282228
Chr1	6294266	6295266
Chr1	6298360	6299360
Chr1	6298523	6299523
Chr1	6300074	6301074
Chr1	6312404	6313404
Chr1	6329849	6330849
Chr1	6333062	6334062
Chr1	6336187	6337187
Chr1	6403229	6404229
Chr1	6407679	6408679
Chr1	6407937	6408937
Chr1	6457529	6458529
Chr1	6474092	6475092
Chr1	6491480	6492480
Chr1	6497788	6498788
Chr1	6504539	6505539
Chr1	6504732	6505732
Chr1	6532153	6533153
Chr1	6542033	6543033
Chr1	6546288	6547288
Chr1	6561108	6562108
Chr1	6578097	6579097
Chr1	6614981	6615981
Chr1	6616764	6617764
Chr1	6633803	6634803
Chr1	6649724	6650724
Chr1	6658945	6659945
Chr1	6692323	6693323
Chr1	6706145	6707145
Chr1	6726425	6727425
Chr1	6787182	6788182
Chr1	6795603	6796603
Chr1	6798894	6799894
Chr1	6803467	6804467
Chr1	6817523	6818523
Chr1	6830506	6831506
Chr1	6970952	6971952
Chr1	7020206	7021206
Chr1	7072164	7073164
Chr1	7135098	7136098
Chr1	7177198	7178198
Chr1	7267638	7268638
Chr1	7599470	7600470
Chr1	7601438	7602438
Chr1	7681648	7682648
Chr1	7728267	7729267
Chr1	7762054	7763054
Chr1	7910569	7911569
Chr1	7916148	7917148
Chr1	7919175	7920175
Chr1	7924483	7925483
Chr1	7959536	7960536
Chr1	7992499	7993499
Chr1	8000893	8001893
Chr1	8001079	8002079
Chr1	8034927	8035927
Chr1	8042068	8043068
Chr1	8064106	8065106
Chr1	8074222	8075222
Chr1	8160351	8161351
Chr1	8164371	8165371
Chr1	8180224	8181224
Chr1	8180499	8181499
Chr1	8181099	8182099
Chr1	8186915	8187915
Chr1	8196495	8197495
Chr1	8211794	8212794
Chr1	8214449	8215449
Chr1	8217820	8218820
Chr1	8254734	8255734
Chr1	8258234	8259234
Chr1	8262286	8263286
Chr1	8271797	8272797
Chr1	8273397	8274397
Chr1	8284619	8285619
Chr1	8289155	8290155
Chr1	8289307	8290307
Chr1	8336300	8337300
Chr1	8343048	8344048
Chr1	8373982	8374982
Chr1	8408727	8409727
Chr1	8411449	8412449
Chr1	8452274	8453274
Chr1	8486772	8487772
Chr1	8585397	8586397
Chr1	8843732	8844732
Chr1	8848453	8849453
Chr1	8885860	8886860
Chr1	8905177	8906177
Chr1	8908568	8909568
Chr1	8919088	8920088
Chr1	8919940	8920940
Chr1	8922364	8923364
Chr1	8923059	8924059
Chr1	8926231	8927231
Chr1	8931264	8932264
Chr1	8940560	8941560
Chr1	8944656	8945656
Chr1	8949071	8950071
Chr1	8963291	8964291
Chr1	9018519	9019519
Chr1	9022677	9023677
Chr1	9022893	9023893
Chr1	9047702	9048702
Chr1	9064883	9065883
Chr1	9201998	9202998
Chr1	9204999	9205999
Chr1	9266788	9267788
Chr1	9277736	9278736
Chr1	9326854	9327854
Chr1	9442629	9443629
Chr1	9499133	9500133
Chr1	9550799	9551799
Chr1	9567297	9568297
Chr1	9580151	9581151
Chr1	9588940	9589940
Chr1	9636174	9637174
Chr1	9646016	9647016
Chr1	9649454	9650454
Chr1	9675416	9676416
Chr1	9680870	9681870
Chr1	9736446	9737446
Chr1	9736739	9737739
Chr1	9777845	9778845
Chr1	9778280	9779280
Chr1	9784549	9785549
Chr1	9812838	9813838
Chr1	9835122	9836122
Chr1	9852178	9853178
Chr1	9869029	9870029
Chr1	9887387	9888387
Chr1	9906346	9907346
Chr1	9907750	9908750
Chr1	9909364	9910364
Chr1	9910380	9911380
Chr1	9927216	9928216
Chr1	9961361	9962361
Chr1	10066933	10067933
Chr1	10105618	10106618
Chr1	10124939	10125939
Chr1	10243781	10244781
Chr1	10244797	10245797
Chr1	10249521	10250521
Chr1	10273677	10274677
Chr1	10364080	10365080
Chr1	10443976	10444976
Chr1	10487768	10488768
Chr1	10552868	10553868
Chr1	10554374	10555374
Chr1	10554769	10555769
Chr1	10571325	10572325
Chr1	10613038	10614038
Chr1	10615471	10616471
Chr1	10615980	10616980
Chr1	10751408	10752408
Chr1	10781333	10782333
Chr1	10815581	10816581
Chr1	10932928	10933928
Chr1	10939867	10940867
Chr1	10999875	11000875
Chr1	11016820	11017820
Chr1	11020715	11021715
Chr1	11097347	11098347
Chr1	11109831	11110831
Chr1	11111820	11112820
Chr1	11112911	11113911
Chr1	11121411	11122411
Chr1	11371581	11372581
Chr1	11374549	11375549
Chr1	11378755	11379755
Chr1	11397401	11398401
Chr1	11399666	11400666
Chr1	11423954	11424954
Chr1	11443914	11444914
Chr1	11448366	11449366
Chr1	11474909	11475909
Chr1	11624071	11625071
Chr1	11627156	11628156
Chr1	11631903	11632903
Chr1	11705456	11706456
Chr1	11709456	11710456
Chr1	11710681	11711681
Chr1	11722062	11723062
Chr1	11722431	11723431
Chr1	11738908	11739908
Chr1	11741938	11742938
Chr1	11742517	11743517
Chr1	11748317	11749317
Chr1	11749790	11750790
Chr1	11752852	11753852
Chr1	11753612	11754612
Chr1	11756853	11757853
Chr1	11757749	11758749
Chr1	11767598	11768598
Chr1	11768352	11769352
Chr1	11779043	11780043
Chr1	11779514	11780514
Chr1	11790120	11791120
Chr1	11792305	11793305
Chr1	11797835	11798835
Chr1	11798565	11799565
Chr1	11799235	11800235
Chr1	11808863	11809863
Chr1	11810905	11811905
Chr1	11811669	11812669
Chr1	11812353	11813353
Chr1	11822297	11823297
Chr1	11828427	11829427
Chr1	11832176	11833176
Chr1	11837522	11838522
Chr1	11843272	11844272
Chr1	11856054	11857054
Chr1	11858902	11859902
Chr1	11859059	11860059
Chr1	11860527	11861527
Chr1	11861057	11862057
Chr1	11864474	11865474
Chr1	11891924	11892924
Chr1	11895821	11896821
Chr1	11898486	11899486
Chr1	11900863	11901863
Chr1	11901400	11902400
Chr1	11901968	11902968
Chr1	11902501	11903501
Chr1	11910905	11911905
Chr1	11912489	11913489
Chr1	11925285	11926285
Chr1	11939327	11940327
Chr1	11940785	11941785
Chr1	11941747	11942747
Chr1	11953024	11954024
Chr1	11953627	11954627
Chr1	11954871	11955871
Chr1	11965935	11966935
Chr1	11970373	11971373
Chr1	11987621	11988621
Chr1	11990167	11991167
Chr1	11990786	11991786
Chr1	11991044	11992044
Chr1	12026891	12027891
Chr1	12037392	12038392
Chr1	12038137	12039137
Chr1	12043178	12044178
Chr1	12057239	12058239
Chr1	12061245	12062245
Chr1	12064114	12065114
Chr1	12066276	12067276
Chr1	12090966	12091966
Chr1	12094970	12095970
Chr1	12098008	12099008
Chr1	12098404	12099404
Chr1	12100236	12101236
Chr1	12103981	12104981
Chr1	12104410	12105410
Chr1	12109379	12110379
Chr1	12115956	12116956
Chr1	12116212	12117212
Chr1	12120020	12121020
Chr1	12135273	12136273
Chr1	12139295	12140295
Chr1	12139964	12140964
Chr1	12140879	12141879
Chr1	12143511	12144511
Chr1	12173378	12174378
Chr1	12178342	12179342
Chr1	12213053	12214053
Chr1	12224391	12225391
Chr1	12228298	12229298
Chr1	12233153	12234153
Chr1	12242549	12243549
Chr1	12255215	12256215
Chr1	12262322	12263322
Chr1	12268611	12269611
Chr1	12268952	12269952
Chr1	12275302	12276302
Chr1	12275520	12276520
Chr1	12275945	12276945
Chr1	12335650	12336650
Chr1	12335974	12336974
Chr1	12488111	12489111
Chr1	12492264	12493264
Chr1	12495167	12496167
Chr1	12495888	12496888
Chr1	12500841	12501841
Chr1	12509919	12510919
Chr1	12514012	12515012
Chr1	12537005	12538005
Chr1	12539174	12540174
Chr1	12541727	12542727
Chr1	12556969	12557969
Chr1	12570255	12571255
Chr1	12573082	12574082
Chr1	12573518	12574518
Chr1	12583132	12584132
Chr1	12601053	12602053
Chr1	12601735	12602735
Chr1	12612748	12613748
Chr1	12613690	12614690
Chr1	12618015	12619015
Chr1	12625697	12626697
Chr1	12625874	12626874
Chr1	12626560	12627560
Chr1	12627863	12628863
Chr1	12633542	12634542
Chr1	12650743	12651743
Chr1	12650969	12651969
Chr1	12653221	12654221
Chr1	12660945	12661945
Chr1	12661234	12662234
Chr1	12661666	12662666
Chr1	12668150	12669150
Chr1	12670396	12671396
Chr1	12671135	12672135
Chr1	12672979	12673979
Chr1	12674862	12675862
Chr1	12680170	12681170
Chr1	12712255	12713255
Chr1	12717108	12718108
Chr1	12718581	12719581
Chr1	12726028	12727028
Chr1	14133366	14134366
Chr1	14134798	14135798
Chr1	14135198	14136198
Chr1	14135827	14136827
Chr1	14139815	14140815
Chr1	14286575	14287575
Chr1	14291995	14292995
Chr1	14475607	14476607
Chr1	14660026	14661026
Chr1	14743603	14744603
Chr1	14749603	14750603
Chr1	14750240	14751240
Chr1	14759979	14760979
Chr1	14760448	14761448
Chr1	14760954	14761954
Chr1	14761645	14762645
Chr1	14763894	14764894
Chr1	14764621	14765621
Chr1	14765921	14766921
Chr1	14766149	14767149
Chr1	14824876	14825876
Chr1	14849036	14850036
Chr1	14855409	14856409
Chr1	14887330	14888330
Chr1	14912019	14913019
Chr1	14917013	14918013
Chr1	14919048	14920048
Chr1	14920412	14921412
Chr1	14938433	14939433
Chr1	14982724	14983724
Chr1	15058059	15059059
Chr1	15063635	15064635
Chr1	15065590	15066590
Chr1	15068388	15069388
Chr1	15089058	15090058
Chr1	15092764	15093764
Chr1	15095713	15096713
Chr1	15101671	15102671
Chr1	15102361	15103361
Chr1	15106928	15107928
Chr1	15113935	15114935
Chr1	15114787	15115787
Chr1	15130808	15131808
Chr1	15150522	15151522
Chr1	15156803	15157803
Chr1	15164301	15165301
Chr1	15166552	15167552
Chr1	15176737	15177737
Chr1	15202348	15203348
Chr1	15210749	15211749
Chr1	15241567	15242567
Chr1	15241805	15242805
Chr1	15245630	15246630
Chr1	15254029	15255029
Chr1	15255657	15256657
Chr1	15266738	15267738
Chr1	15279359	15280359
Chr1	15353684	15354684
Chr1	15364435	15365435
Chr1	15364691	15365691
Chr1	15372703	15373703
Chr1	15426022	15427022
Chr1	15426521	15427521
Chr1	15432824	15433824
Chr1	15438400	15439400
Chr1	15442116	15443116
Chr1	15497718	15498718
Chr1	15562280	15563280
Chr1	15598765	15599765
Chr1	15605799	15606799
Chr1	15630882	15631882
Chr1	15638081	15639081
Chr1	15650717	15651717
Chr1	15652301	15653301
Chr1	15672647	15673647
Chr1	15684944	15685944
Chr1	15697861	15698861
Chr1	15714015	15715015
Chr1	15738328	15739328
Chr1	15743151	15744151
Chr1	15747134	15748134
Chr1	15749385	15750385
Chr1	15757387	15758387
Chr1	15770573	15771573
Chr1	15775383	15776383
Chr1	15775800	15776800
Chr1	15779024	15780024
Chr1	15798738	15799738
Chr1	15827565	15828565
Chr1	15827826	15828826
Chr1	15845482	15846482
Chr1	15868680	15869680
Chr1	15918480	15919480
Chr1	15923017	15924017
Chr1	15952626	15953626
Chr1	15977822	15978822
Chr1	16004759	16005759
Chr1	16067523	16068523
Chr1	16110317	16111317
Chr1	16115124	16116124
Chr1	16117807	16118807
Chr1	16118199	16119199
Chr1	16121914	16122914
Chr1	16122647	16123647
Chr1	16125150	16126150
Chr1	16128237	16129237
Chr1	16208817	16209817
Chr1	16265518	16266518
Chr1	16275499	16276499
Chr1	16279441	16280441
Chr1	16280438	16281438
Chr1	16283746	16284746
Chr1	16299644	16300644
Chr1	16320705	16321705
Chr1	16322787	16323787
Chr1	16333286	16334286
Chr1	16335154	16336154
Chr1	16340749	16341749
Chr1	16379029	16380029
Chr1	16380982	16381982
Chr1	16381743	16382743
Chr1	16383277	16384277
Chr1	16393540	16394540
Chr1	16396297	16397297
Chr1	16402196	16403196
Chr1	16405096	16406096
Chr1	16408484	16409484
Chr1	16449129	16450129
Chr1	16465673	16466673
Chr1	16468462	16469462
Chr1	16473532	16474532
Chr1	16477582	16478582
Chr1	16487765	16488765
Chr1	16513977	16514977
Chr1	16521286	16522286
Chr1	16523609	16524609
Chr1	16531189	16532189
Chr1	16562142	16563142
Chr1	16562507	16563507
Chr1	16563737	16564737
Chr1	16569323	16570323
Chr1	16569786	16570786
Chr1	16570577	16571577
Chr1	16730149	16731149
Chr1	16756772	16757772
Chr1	16768591	16769591
Chr1	16771319	16772319
Chr1	16816411	16817411
Chr1	16823635	16824635
Chr1	16929261	16930261
Chr1	16933658	16934658
Chr1	16947403	16948403
Chr1	16948396	16949396
Chr1	16949443	16950443
Chr1	16951671	16952671
Chr1	16954740	16955740
Chr1	16958698	16959698
Chr1	16969056	16970056
Chr1	16969490	16970490
Chr1	16971703	16972703
Chr1	17017398	17018398
Chr1	17029407	17030407
Chr1	17035974	17036974
Chr1	17044195	17045195
Chr1	17047017	17048017
Chr1	17076651	17077651
Chr1	17092771	17093771
Chr1	17196322	17197322
Chr1	17213462	17214462
Chr1	17238034	17239034
Chr1	17241666	17242666
Chr1	17249222	17250222
Chr1	17256781	17257781
Chr1	17277517	17278517
Chr1	17299430	17300430
Chr1	17335859	17336859
Chr1	17339391	17340391
Chr1	17385859	17386859
Chr1	17432930	17433930
Chr1	17565578	17566578
Chr1	17574996	17575996
Chr1	17600383	17601383
Chr1	17612080	17613080
Chr1	17645773	17646773
Chr1	17662285	17663285
Chr1	17666592	17667592
Chr1	17694687	17695687
Chr1	17718416	17719416
Chr1	17723547	17724547
Chr1	17723875	17724875
Chr1	17726985	17727985
Chr1	17730729	17731729
Chr1	17732161	17733161
Chr1	17789611	17790611
Chr1	17801909	17802909
Chr1	17811458	17812458
Chr1	17815165	17816165
Chr1	17820409	17821409
Chr1	17828518	17829518
Chr1	17932946	17933946
Chr1	17987778	17988778
Chr1	17992106	17993106
Chr1	17999905	18000905
Chr1	18245628	18246628
Chr1	18249050	18250050
Chr1	18310676	18311676
Chr1	18426673	18427673
Chr1	18543595	18544595
Chr1	18923632	18924632
Chr1	19007486	19008486
Chr1	19134257	19135257
Chr1	19138295	19139295
Chr1	19146943	19147943
Chr1	19162815	19163815
Chr1	19180790	19181790
Chr1	19201424	19202424
Chr1	19210337	19211337
Chr1	19218974	19219974
Chr1	19221594	19222594
Chr1	19239080	19240080
Chr1	19250013	19251013
Chr1	19253929	19254929
Chr1	19276241	19277241
Chr1	19318817	19319817
Chr1	19388802	19389802
Chr1	19399042	19400042
Chr1	19408181	19409181
Chr1	19408385	19409385
Chr1	19408690	19409690
Chr1	19425656	19426656
Chr1	19479367	19480367
Chr1	19529612	19530612
Chr1	19567447	19568447
Chr1	19588149	19589149
Chr1	19626181	19627181
Chr1	19637099	19638099
Chr1	19639660	19640660
Chr1	19642676	19643676
Chr1	19667660	19668660
Chr1	19670528	19671528
Chr1	19700512	19701512
Chr1	19717484	19718484
Chr1	19725332	19726332
Chr1	19731368	19732368
Chr1	19732096	19733096
Chr1	19734485	19735485
Chr1	19762010	19763010
Chr1	19762248	19763248
Chr1	19765996	19766996
Chr1	19772025	19773025
Chr1	19796050	19797050
Chr1	19802814	19803814
Chr1	19804113	19805113
Chr1	19831935	19832935
Chr1	19908191	19909191
Chr1	19908423	19909423
Chr1	19966129	19967129
Chr1	19974924	19975924
Chr1	19979871	19980871
Chr1	20002607	20003607
Chr1	20034808	20035808
Chr1	20041697	20042697
Chr1	20085571	20086571
Chr1	20088468	20089468
Chr1	20091847	20092847
Chr1	20137422	20138422
Chr1	20198322	20199322
Chr1	20244190	20245190
Chr1	20300993	20301993
Chr1	20427096	20428096
Chr1	20436944	20437944
Chr1	20449861	20450861
Chr1	20491583	20492583
Chr1	20510703	20511703
Chr1	20521268	20522268
Chr1	20523645	20524645
Chr1	20526069	20527069
Chr1	20703071	20704071
Chr1	20703204	20704204
Chr1	20756592	20757592
Chr1	20766923	20767923
Chr1	20799402	20800402
Chr1	20820039	20821039
Chr1	20848515	20849515
Chr1	20895687	20896687
Chr1	20904860	20905860
Chr1	20914834	20915834
Chr1	20939678	20940678
Chr1	20966307	20967307
Chr1	20968444	20969444
Chr1	20988379	20989379
Chr1	20992995	20993995
Chr1	21048572	21049572
Chr1	21455589	21456589
Chr1	21543058	21544058
Chr1	21544174	21545174
Chr1	21565367	21566367
Chr1	21581376	21582376
Chr1	21587294	21588294
Chr1	21587575	21588575
Chr1	21589001	21590001
Chr1	21596035	21597035
Chr1	21625181	21626181
Chr1	21633834	21634834
Chr1	21636443	21637443
Chr1	21658059	21659059
Chr1	21659058	21660058
Chr1	21660097	21661097
Chr1	21660342	21661342
Chr1	21667224	21668224
Chr1	21669396	21670396
Chr1	21672428	21673428
Chr1	21672838	21673838
Chr1	21694600	21695600
Chr1	21696766	21697766
Chr1	21823854	21824854
Chr1	21836987	21837987
Chr1	21837348	21838348
Chr1	21842525	21843525
Chr1	21857537	21858537
Chr1	21860340	21861340
Chr1	21860957	21861957
Chr1	21875991	21876991
Chr1	21876354	21877354
Chr1	21877197	21878197
Chr1	21879804	21880804
Chr1	21885206	21886206
Chr1	21894460	21895460
Chr1	21896329	21897329
Chr1	21898983	21899983
Chr1	21911228	21912228
Chr1	21911810	21912810
Chr1	21921771	21922771
Chr1	21935891	21936891
Chr1	21937030	21938030
Chr1	21942523	21943523
Chr1	21946220	21947220
Chr1	21954950	21955950
Chr1	21955160	21956160
Chr1	21959401	21960401
Chr1	21960901	21961901
Chr1	21961157	21962157
Chr1	21974095	21975095
Chr1	21997220	21998220
Chr1	21997449	21998449
Chr1	22000034	22001034
Chr1	22131519	22132519
Chr1	22139619	22140619
Chr1	22143051	22144051
Chr1	22146032	22147032
Chr1	22192472	22193472
Chr1	22222967	22223967
Chr1	22223541	22224541
Chr1	22223975	22224975
Chr1	22224194	22225194
Chr1	22228687	22229687
Chr1	22229835	22230835
Chr1	22232109	22233109
Chr1	22235316	22236316
Chr1	22236476	22237476
Chr1	22236959	22237959
Chr1	22238416	22239416
Chr1	22240283	22241283
Chr1	22241567	22242567
Chr1	22243707	22244707
Chr1	22248312	22249312
Chr1	22251146	22252146
Chr1	22258280	22259280
Chr1	22268011	22269011
Chr1	22282820	22283820
Chr1	22283341	22284341
Chr1	22290105	22291105
Chr1	22291043	22292043
Chr1	22331330	22332330
Chr1	22353682	22354682
Chr1	22356657	22357657
Chr1	22364308	22365308
Chr1	22374850	22375850
Chr1	22398559	22399559
Chr1	22458104	22459104
Chr1	22471673	22472673
Chr1	22471905	22472905
Chr1	22493978	22494978
Chr1	22494129	22495129
Chr1	22500616	22501616
Chr1	22534430	22535430
Chr1	22544843	22545843
Chr1	22602034	22603034
Chr1	22622900	22623900
Chr1	22643429	22644429
Chr1	22691736	22692736
Chr1	22738594	22739594
Chr1	22742725	22743725
Chr1	22746646	22747646
Chr1	22880319	22881319
Chr1	22937649	22938649
Chr1	22968165	22969165
Chr1	22988566	22989566
Chr1	23015684	23016684
Chr1	23030433	23031433
Chr1	23030699	23031699
Chr1	23065884	23066884
Chr1	23172710	23173710
Chr1	23215385	23216385
Chr1	23256468	23257468
Chr1	23301543	23302543
Chr1	23302694	23303694
Chr1	23424821	23425821
Chr1	23495894	23496894
Chr1	23505219	23506219
Chr1	23510227	23511227
Chr1	23536422	23537422
Chr1	23536605	23537605
Chr1	23538176	23539176
Chr1	23544418	23545418
Chr1	23550807	23551807
Chr1	23551139	23552139
Chr1	23582450	23583450
Chr1	23688373	23689373
Chr1	23698193	23699193
Chr1	23706551	23707551
Chr1	23710091	23711091
Chr1	23718211	23719211
Chr1	23730077	23731077
Chr1	23755624	23756624
Chr1	23785502	23786502
Chr1	23785742	23786742
Chr1	23801525	23802525
Chr1	23806467	23807467
Chr1	23823263	23824263
Chr1	23847765	23848765
Chr1	23865954	23866954
Chr1	23870874	23871874
Chr1	23874902	23875902
Chr1	23882341	23883341
Chr1	23916625	23917625
Chr1	23940392	23941392
Chr1	23942611	23943611
Chr1	23961199	23962199
Chr1	23977351	23978351
Chr1	24046628	24047628
Chr1	24099048	24100048
Chr1	24117877	24118877
Chr1	24127720	24128720
Chr1	24128379	24129379
Chr1	24129758	24130758
Chr1	24135928	24136928
Chr1	24149927	24150927
Chr1	24226947	24227947
Chr1	24234532	24235532
Chr1	24234729	24235729
Chr1	24236995	24237995
Chr1	24243018	24244018
Chr1	24281340	24282340
Chr1	24337842	24338842
Chr1	24344612	24345612
Chr1	24344968	24345968
Chr1	24369421	24370421
Chr1	24372555	24373555
Chr1	24373299	24374299
Chr1	24397039	24398039
Chr1	24424845	24425845
Chr1	24435004	24436004
Chr1	24446168	24447168
Chr1	24476103	24477103
Chr1	24525546	24526546
Chr1	24580991	24581991
Chr1	24612411	24613411
Chr1	24651116	24652116
Chr1	24673206	24674206
Chr1	24699770	24700770
Chr1	24711357	24712357
Chr1	24764041	24765041
Chr1	24767071	24768071
Chr1	24779257	24780257
Chr1	24827456	24828456
Chr1	24868189	24869189
Chr1	24877813	24878813
Chr1	24878388	24879388
Chr1	24885194	24886194
Chr1	24912248	24913248
Chr1	24913310	24914310
Chr1	24936728	24937728
Chr1	24946777	24947777
Chr1	24967970	24968970
Chr1	25011578	25012578
Chr1	25014396	25015396
Chr1	25014728	25015728
Chr1	25020569	25021569
Chr1	25030733	25031733
Chr1	25032678	25033678
Chr1	25033732	25034732
Chr1	25056484	25057484
Chr1	25175942	25176942
Chr1	25183838	25184838
Chr1	25224270	25225270
Chr1	25278595	25279595
Chr1	25296534	25297534
Chr1	25316807	25317807
Chr1	25363309	25364309
Chr1	25400139	25401139
Chr1	25427587	25428587
Chr1	25443644	25444644
Chr1	25466327	25467327
Chr1	25466531	25467531
Chr1	25523801	25524801
Chr1	25525007	25526007
Chr1	25542248	25543248
Chr1	25543240	25544240
Chr1	25544525	25545525
Chr1	25574657	25575657
Chr1	25626991	25627991
Chr1	25627254	25628254
Chr1	25627570	25628570
Chr1	25712451	25713451
Chr1	25714954	25715954
Chr1	25719169	25720169
Chr1	25740084	25741084
Chr1	25740304	25741304
Chr1	25744929	25745929
Chr1	25746310	25747310
Chr1	25841025	25842025
Chr1	25843311	25844311
Chr1	25843593	25844593
Chr1	25844178	25845178
Chr1	25849701	25850701
Chr1	25852932	25853932
Chr1	25858691	25859691
Chr1	25874213	25875213
Chr1	25874800	25875800
Chr1	25875140	25876140
Chr1	25896087	25897087
Chr1	25898847	25899847
Chr1	25912270	25913270
Chr1	25934706	25935706
Chr1	25936939	25937939
Chr1	25945259	25946259
Chr1	25999120	26000120
Chr1	26018779	26019779
Chr1	26024510	26025510
Chr1	26025664	26026664
Chr1	26037252	26038252
Chr1	26053916	26054916
Chr1	26056924	26057924
Chr1	26057460	26058460
Chr1	26070295	26071295
Chr1	26110859	26111859
Chr1	26122974	26123974
Chr1	26124197	26125197
Chr1	26128776	26129776
Chr1	26129049	26130049
Chr1	26133413	26134413
Chr1	26137002	26138002
Chr1	26144849	26145849
Chr1	26145202	26146202
Chr1	26215649	26216649
Chr1	26221603	26222603
Chr1	26223752	26224752
Chr1	26225090	26226090
Chr1	26246071	26247071
Chr1	26253034	26254034
Chr1	26325013	26326013
Chr1	26331664	26332664
Chr1	26332254	26333254
Chr1	26336200	26337200
Chr1	26342498	26343498
Chr1	26342786	26343786
Chr1	26342970	26343970
Chr1	26343466	26344466
Chr1	26345937	26346937
Chr1	26347699	26348699
Chr1	26358175	26359175
Chr1	26367868	26368868
Chr1	26370528	26371528
Chr1	26370669	26371669
Chr1	26376010	26377010
Chr1	26380187	26381187
Chr1	26384801	26385801
Chr1	26386043	26387043
Chr1	26386932	26387932
Chr1	26392571	26393571
Chr1	26395421	26396421
Chr1	26398362	26399362
Chr1	26420384	26421384
Chr1	26420921	26421921
Chr1	26471183	26472183
Chr1	26480446	26481446
Chr1	26494650	26495650
Chr1	26516551	26517551
Chr1	26607119	26608119
Chr1	26609041	26610041
Chr1	26609657	26610657
Chr1	26610119	26611119
Chr1	26612129	26613129
Chr1	26612526	26613526
Chr1	26612749	26613749
Chr1	26613314	26614314
Chr1	26613991	26614991
Chr1	26615297	26616297
Chr1	26616379	26617379
Chr1	26631986	26632986
Chr1	26641568	26642568
Chr1	26644716	26645716
Chr1	26646164	26647164
Chr1	26647648	26648648
Chr1	26654992	26655992
Chr1	26665362	26666362
Chr1	26677481	26678481
Chr1	26677690	26678690
Chr1	26684817	26685817
Chr1	26685065	26686065
Chr1	26697300	26698300
Chr1	26698293	26699293
Chr1	26700579	26701579
Chr1	26712204	26713204
Chr1	26713604	26714604
Chr1	26721885	26722885
Chr1	26743233	26744233
Chr1	26776073	26777073
Chr1	26796509	26797509
Chr1	26797235	26798235
Chr1	26813539	26814539
Chr1	26854813	26855813
Chr1	26856822	26857822
Chr1	26864216	26865216
Chr1	26864908	26865908
Chr1	26870298	26871298
Chr1	26870954	26871954
Chr1	26875030	26876030
Chr1	26900799	26901799
Chr1	26901610	26902610
Chr1	27085118	27086118
Chr1	27096212	27097212
Chr1	27115140	27116140
Chr1	27116637	27117637
Chr1	27117163	27118163
Chr1	27125551	27126551
Chr1	27126001	27127001
Chr1	27157905	27158905
Chr1	27179317	27180317
Chr1	27187415	27188415
Chr1	27196141	27197141
Chr1	27213342	27214342
Chr1	27230489	27231489
Chr1	27247026	27248026
Chr1	27249429	27250429
Chr1	27249898	27250898
Chr1	27272886	27273886
Chr1	27276813	27277813
Chr1	27278350	27279350
Chr1	27283347	27284347
Chr1	27287962	27288962
Chr1	27293023	27294023
Chr1	27297033	27298033
Chr1	27317618	27318618
Chr1	27328110	27329110
Chr1	27328319	27329319
Chr1	27341380	27342380
Chr1	27344492	27345492
Chr1	27347329	27348329
Chr1	27348821	27349821
Chr1	27353548	27354548
Chr1	27387080	27388080
Chr1	27401104	27402104
Chr1	27423315	27424315
Chr1	27423640	27424640
Chr1	27428856	27429856
Chr1	27432980	27433980
Chr1	27435233	27436233
Chr1	27471569	27472569
Chr1	27479022	27480022
Chr1	27479638	27480638
Chr1	27480060	27481060
Chr1	27524160	27525160
Chr1	27532043	27533043
Chr1	27546880	27547880
Chr1	27609486	27610486
Chr1	27622911	27623911
Chr1	27626945	27627945
Chr1	27644716	27645716
Chr1	27658818	27659818
Chr1	27677875	27678875
Chr1	27695048	27696048
Chr1	27702219	27703219
Chr1	27703902	27704902
Chr1	27714569	27715569
Chr1	27727023	27728023
Chr1	27727724	27728724
Chr1	27727902	27728902
Chr1	27728509	27729509
Chr1	27820060	27821060
Chr1	27822848	27823848
Chr1	27829253	27830253
Chr1	27834103	27835103
Chr1	27834426	27835426
Chr1	27835440	27836440
Chr1	27843494	27844494
Chr1	27848748	27849748
Chr1	27850287	27851287
Chr1	27852169	27853169
Chr1	27855268	27856268
Chr1	27855741	27856741
Chr1	27865033	27866033
Chr1	27866373	27867373
Chr1	27889404	27890404
Chr1	27890619	27891619
Chr1	27895603	27896603
Chr1	27898610	27899610
Chr1	27907810	27908810
Chr1	27917704	27918704
Chr1	27926628	27927628
Chr1	27931993	27932993
Chr1	27934744	27935744
Chr1	27935084	27936084
Chr1	27935643	27936643
Chr1	27936046	27937046
Chr1	27957219	27958219
Chr1	27970026	27971026
Chr1	27976828	27977828
Chr1	27985117	27986117
Chr1	27995427	27996427
Chr1	27998226	27999226
Chr1	28040326	28041326
Chr1	28089597	28090597
Chr1	28177954	28178954
Chr1	28182650	28183650
Chr1	28183459	28184459
Chr1	28184023	28185023
Chr1	28184346	28185346
Chr1	28186169	28187169
Chr1	28187690	28188690
Chr1	28189311	28190311
Chr1	28189648	28190648
Chr1	28195490	28196490
Chr1	28215845	28216845
Chr1	28254872	28255872
Chr1	28261796	28262796
Chr1	28283379	28284379
Chr1	28431225	28432225
Chr1	28443668	28444668
Chr1	28455194	28456194
Chr1	28473669	28474669
Chr1	28474302	28475302
Chr1	28481504	28482504
Chr1	28484163	28485163
Chr1	28485330	28486330
Chr1	28499955	28500955
Chr1	28500749	28501749
Chr1	28503396	28504396
Chr1	28522682	28523682
Chr1	28588290	28589290
Chr1	28589234	28590234
Chr1	28591061	28592061
Chr1	28610222	28611222
Chr1	28610988	28611988
Chr1	28612315	28613315
Chr1	28622835	28623835
Chr1	28641372	28642372
Chr1	28653193	28654193
Chr1	28674502	28675502
Chr1	28682509	28683509
Chr1	28694377	28695377
Chr1	28955774	28956774
Chr1	28981573	28982573
Chr1	28989897	28990897
Chr1	29106367	29107367
Chr1	29107946	29108946
Chr1	29108173	29109173
Chr1	29108422	29109422
Chr1	29114787	29115787
Chr1	29116707	29117707
Chr1	29134212	29135212
Chr1	29156953	29157953
Chr1	29163246	29164246
Chr1	29172242	29173242
Chr1	29181847	29182847
Chr1	29192231	29193231
Chr1	29203004	29204004
Chr1	29203384	29204384
Chr1	29204530	29205530
Chr1	29208385	29209385
Chr1	29211770	29212770
Chr1	29219576	29220576
Chr1	29219902	29220902
Chr1	29225433	29226433
Chr1	29226823	29227823
Chr1	29261016	29262016
Chr1	29471997	29472997
Chr1	29523716	29524716
Chr1	29528369	29529369
Chr1	29567148	29568148
Chr1	29568370	29569370
Chr1	29575332	29576332
Chr1	29583384	29584384
Chr1	29584854	29585854
Chr1	29632129	29633129
Chr1	29658379	29659379
Chr1	29667105	29668105
Chr1	29675943	29676943
Chr1	29676223	29677223
Chr1	29680755	29681755
Chr1	29839521	29840521
Chr1	30176008	30177008
Chr1	30265523	30266523
Chr1	30447630	30448630
Chr1	30578670	30579670
Chr1	30584006	30585006
[truncated: 101,346 more rows]

[truncated: 3 more sheets: enhancers in K562, silencers in HPC, enhancers in HPC]
